# Supplementary material for: Anaplasma phagocytophilum AFAP targets the host nucleolus and inhibits induced apoptosis
Source: Front Microbiol. 2025 Jan 7;15:1533640. doi: 10.3389/fmicb.2024.1533640 (PMC11747512; doi:10.3389/fmicb.2024.1533640)
Supplement: Supplementary file 3 [file Table_3.XLSX]

## Sheet: BP
Level	GO_ID	Term	Type	Seqs_Num	Sequences
1	GO:0008150	biological_process	Biological Process	546	P49917,Q96EB6,P52292,P05388,P27635,P46087,P46777,P62750,P83731,Q02878,Q14137,Q9NVX2,Q9Y3A4,P28288,O95817,Q7Z3C6,O14980,P06748,Q86XI2,Q8NI77,Q9BXS6,O75419,O94874,Q96RU2,Q99459,Q9UMS4,P32780,P50613,Q9BZE4,O00743,P62753,Q13617,Q15910,Q2Q1W2,Q86VI3,Q07002,Q16762,O75367,O96028,P04637,P16403,P18847,P35251,P42224,P49711,P52952,Q09028,Q15022,Q15648,Q32MZ4,Q4G0J3,Q7L2J0,Q8TF47,Q96IZ0,Q96T58,Q9BQ70,Q9UDR5,…
2	GO:0000003	reproduction	Biological Process	49	Q02880,Q96AY2,Q13144,Q96EB6,Q5TAX3,P62753,Q15648,Q16531,Q9BXW9,P46379,O60216,Q8NI77,P30153,Q9Y4F3,P42345,O00507,P20226,Q16181,Q4G0J3,Q8IXK0,Q8NB90,Q96PN6,Q96SI9,Q9H6S0,Q9UMX1,Q9Y2H6,P17987,P49368,P50990,P50991,P78371,Q99832,Q9H2H9,P47914,Q9H9Y6,Q9UL16,Q96SB4,P78527,P67775,Q9H4I0,Q13042,Q9UJX2,Q9UJX3,Q9UJX4,Q9UJX5,P35520,Q08379,Q8TD08,Q8IY37
2	GO:0002376	immune system process	Biological Process	74	Q96L92,P78527,P04637,Q56NI9,Q8WYA6,Q9H2X3,P42345,P62753,P49917,P46379,Q9NR30,Q96EB6,P19174,O15111,O75569,P02794,Q06265,P27361,P20585,P52952,P29590,Q02880,Q15910,Q9Y4B6,O94874,P38646,Q15758,Q86XI2,Q6IAN0,Q15648,O94887,Q96IZ0,Q96QE3,P62847,Q6SZW1,P42224,Q38SD2,Q9Y6K5,O14730,P30825,P07437,P30153,P67775,O43747,O00743,O95373,P57088,P78362,Q13325,Q7Z2W4,Q92974,Q96SB4,Q9BUZ4,Q9H1D9,Q9NRW3,Q9NVU0,Q9NW08,…
2	GO:0007610	behavior	Biological Process	9	Q8NBU5,P78559,Q96SI9,Q15813,P42858,P50416,P42345,P04637,Q7Z2T5
2	GO:0008152	metabolic process	Biological Process	432	P49917,Q96EB6,P52292,P28288,O95817,Q7Z3C6,P32780,P50613,Q9BZE4,Q07002,Q16762,O75367,O96028,P04637,P16403,P18847,P27635,P35251,P42224,P49711,P52952,Q09028,Q15022,Q15648,Q15910,Q32MZ4,Q4G0J3,Q7L2J0,Q8TF47,Q96IZ0,Q96T58,Q9BQ70,Q9UDR5,Q9UMX1,Q9Y3T9,Q9Y4B6,Q9Y6Q3,Q6IN84,Q9H0A0,O43159,O60264,Q9UIF9,Q01780,O95376,Q149N8,Q9UMS4,Q15020,P78362,Q96SB4,Q504Q3,Q5TAX3,Q9UIV1,Q9UBW8,O75934,Q12872,O75475,O43660,…
2	GO:0009987	cellular process	Biological Process	538	P49917,Q96EB6,P52292,P05388,P27635,P46087,P46777,P62750,P83731,Q02878,Q14137,Q9NVX2,Q9Y3A4,P28288,O95817,Q7Z3C6,O14980,P06748,Q86XI2,Q8NI77,Q9BXS6,O75419,O94874,Q96RU2,Q99459,Q9UMS4,P32780,P50613,Q9BZE4,O00743,P62753,Q13617,Q15910,Q2Q1W2,Q86VI3,Q07002,Q16762,O75367,O96028,P04637,P16403,P18847,P35251,P42224,P49711,P52952,Q09028,Q15022,Q15648,Q32MZ4,Q4G0J3,Q7L2J0,Q8TF47,Q96IZ0,Q96T58,Q9BQ70,Q9UDR5,…
2	GO:0016032	viral process	Biological Process	23	Q9H2X3,Q16531,P35659,P27824,Q4G0J3,Q9BT40,P11142,Q9H6S0,P78362,Q96SB4,Q9UIV1,P19525,Q13325,Q7Z2W4,Q9NRW3,Q9Y6K5,Q02880,Q9P253,P42224,P52292,P05455,P49917,P04637
2	GO:0022414	reproductive process	Biological Process	49	Q02880,Q96AY2,Q13144,Q96EB6,Q5TAX3,P62753,Q15648,Q16531,Q9BXW9,P46379,O60216,Q8NI77,P30153,Q9Y4F3,P42345,O00507,P20226,Q16181,Q4G0J3,Q8IXK0,Q8NB90,Q96PN6,Q96SI9,Q9H6S0,Q9UMX1,Q9Y2H6,P17987,P49368,P50990,P50991,P78371,Q99832,Q9H2H9,P47914,Q9H9Y6,Q9UL16,Q96SB4,P78527,P67775,Q9H4I0,Q13042,Q9UJX2,Q9UJX3,Q9UJX4,Q9UJX5,P35520,Q08379,Q8TD08,Q8IY37
2	GO:0023052	signaling	Biological Process	159	O75419,O94874,Q96RU2,Q99459,Q9UMS4,P01111,P10398,P27361,P62258,Q7Z569,P04637,Q6IAA8,Q96EV8,Q96DX7,P04899,P49407,Q15648,P46379,P29590,P61254,Q13362,Q9NYZ3,P11021,P38398,Q9NXR7,O15397,O43422,P06748,P35659,P40123,P78368,Q01518,Q02952,Q13564,Q14155,Q14738,Q6SZW1,Q8TF05,Q92845,Q96L92,Q96QZ7,Q96RT1,Q99961,Q9BPU6,Q9BUZ4,Q9UKL3,Q9UL63,Q9UMX1,P19174,Q9Y5X3,Q9UNH7,O00507,O15198,Q96EB6,Q9BT40,Q14831,P39086,…
2	GO:0032501	multicellular organismal process	Biological Process	180	Q13428,P15104,P19338,P78362,Q08722,Q15582,Q15648,Q96EB6,Q13144,Q5TAX3,P52952,O94874,Q9BQG0,Q9BZE4,Q9NR30,Q9P2E9,P04637,P19174,P49917,Q8TCT9,Q9BT40,P78527,Q9NVX2,P62258,Q02880,Q8NAT1,Q9P0L2,O00425,Q9NZI8,P19525,P46379,P26373,Q6DKI1,Q9Y3A4,Q14691,Q86XI2,Q9BRT9,Q9GZM8,P42898,Q2Q1W2,Q96Q89,Q9UMX1,P11310,P62753,Q92688,P35520,Q56NI9,P42345,O15111,O96028,Q8WZ42,P42224,Q16531,Q8NI77,P30153,Q9Y4F3,Q9BXW9,…
2	GO:0032502	developmental process	Biological Process	179	P40123,Q01518,Q15020,Q15648,Q92974,Q96F07,Q9Y2A7,Q13428,P15104,P19338,P78362,Q08722,Q15582,Q96EB6,Q13144,Q5TAX3,P52952,O94874,Q9BQG0,Q9BZE4,Q9NR30,Q9P2E9,P04637,P19174,P49917,Q8TCT9,Q9BT40,P78527,Q9NVX2,P62258,Q02880,Q8NAT1,Q9P0L2,P46379,P26373,Q6DKI1,Q9Y3A4,Q14691,Q86XI2,Q9BRT9,Q9GZM8,P42898,Q2Q1W2,Q96Q89,Q9UMX1,P11310,P62753,Q92688,P35520,Q56NI9,P42345,O96028,P42224,O00507,P20226,Q16181,Q4G0J3,…
2	GO:0040007	growth	Biological Process	23	P06748,P42345,Q6IAA8,Q14691,Q86XI2,Q9BRT9,Q9GZM8,Q15910,Q06265,Q96K76,P04637,P29590,P30153,P38398,P67775,Q9Y4B6,Q96PN6,O95376,Q15813,P52952,Q15648,Q92558,Q96F07
2	GO:0040011	locomotion	Biological Process	37	Q01518,P62258,Q02880,Q8NAT1,Q9P0L2,Q8TER5,Q96F07,Q9BPU6,P15104,P19174,P27361,P29590,Q14155,Q92839,O00507,P41743,P57737,Q08722,Q9GZM8,Q9NYB9,Q9Y2A7,Q9UL16,P04899,P11021,Q75N03,Q09028,Q8TD08,Q9BZE4,P83731,Q96EB6,P40429,Q9BW27,P42345,Q9NYC9,Q02952,Q92974,Q96Q89
2	GO:0043473	pigmentation	Biological Process	6	Q8TDH9,O43747,P78537,Q96EV8,Q9NUP1,Q92572
2	GO:0044419	biological process involved in interspecies interaction between organisms	Biological Process	45	P78527,P29590,P42224,Q96DX7,O15111,O75569,P19525,Q7Z2W4,Q9Y6K5,Q9H2X3,Q16531,P62888,P27361,P40429,Q02952,Q96RT1,O14730,P07437,O43747,Q9BT40,Q9NRW3,P11142,Q9H6S0,O00743,O95373,P57088,P78362,Q13325,Q6SZW1,Q92974,Q96SB4,Q9BUZ4,Q9H1D9,Q9NR30,Q9NVU0,Q9NW08,Q9P253,Q6I9Y2,Q8IZ81,Q9HCE1,Q9UIV1,P04637,Q15648,Q08722,Q93009
2	GO:0048511	rhythmic process	Biological Process	12	Q96EB6,P11387,Q16795,P29590,Q06210,Q9BQG0,P42345,P78527,Q15910,Q16531,Q93009,P04637
2	GO:0048518	positive regulation of biological process	Biological Process	205	Q504Q3,Q5TAX3,Q9UIV1,P19525,P27361,P49407,Q86VI3,Q96EB6,Q96EV8,Q9UER7,P01111,Q96DX7,P42224,Q8NBU5,P78527,P46379,Q9NR30,Q92688,Q9NZJ7,Q9UKL3,O94874,P04899,P06748,P18847,P46087,P46781,P52952,P62753,P78362,Q08722,Q15022,Q15910,Q5TA31,Q8TD08,Q96Q89,P38398,P42345,Q9NYB9,Q9Y2A7,Q96PN6,P04637,P46777,P49711,Q15648,Q8WZ42,Q96IZ0,Q9P0L2,P19174,Q02952,Q14155,P41743,Q96QZ7,Q06265,Q96K76,P11021,Q75N03,Q96QE3,…
2	GO:0048519	negative regulation of biological process	Biological Process	167	O75419,O94874,Q96RU2,Q99459,Q9UMS4,O75367,O96028,P04637,P16403,P18847,P27635,P35251,P42224,P49711,P52952,Q09028,Q15022,Q15648,Q15910,Q32MZ4,Q4G0J3,Q7L2J0,Q8TF47,Q96EB6,Q96IZ0,Q96T58,Q9BQ70,Q9UDR5,Q9UMX1,Q9Y3T9,Q9Y4B6,Q9Y6Q3,O43159,O60264,Q9UIF9,Q01780,Q504Q3,Q5TAX3,Q9UIV1,Q06265,P78527,Q12923,Q8IXB1,Q9BT40,P49407,P19174,P29590,P61254,Q13362,Q9NYZ3,Q92974,P38398,Q9NXR7,Q15582,Q75N03,Q9Y5X3,Q9UNH7,…
2	GO:0050789	regulation of biological process	Biological Process	331	P52292,O75419,O94874,Q96RU2,Q99459,Q9UMS4,P32780,P50613,Q9BZE4,Q07002,O75367,O96028,P04637,P16403,P18847,P27635,P35251,P42224,P49711,P52952,Q09028,Q15022,Q15648,Q15910,Q32MZ4,Q4G0J3,Q7L2J0,Q8TF47,Q96EB6,Q96IZ0,Q96T58,Q9BQ70,Q9UDR5,Q9UMX1,Q9Y3T9,Q9Y4B6,Q9Y6Q3,P01111,P10398,P27361,P62258,Q7Z569,O43159,O60264,Q9UIF9,Q01780,Q504Q3,Q5TAX3,Q9UIV1,Q06265,P06748,P42345,Q6IAA8,O00425,Q9NZI8,P19525,P67775,…
2	GO:0050896	response to stimulus	Biological Process	234	P49917,Q96EB6,O75419,O94874,Q96RU2,Q99459,Q9UMS4,P01111,P10398,P27361,P62258,Q7Z569,Q01831,P38398,P49736,Q9BRT9,Q15054,O60216,P29590,P42898,P04637,Q96DX7,P04899,P49407,Q15648,P78527,P42224,Q8WYA6,Q9H2X3,P42345,P62753,P46379,Q9NR30,P19174,O60264,O75367,O75717,P06748,P20585,P32780,P35250,P35251,P50613,Q13112,Q14807,Q149N8,Q16531,Q96K58,P49848,Q9NXR7,Q93009,Q96K76,O96028,Q56NI9,Q96AY2,Q9Y4F3,Q9BQB6,…
2	GO:0051179	localization	Biological Process	182	O14980,P06748,P42858,Q9GZM8,Q9H2H9,Q01518,P62258,Q02880,Q8NAT1,Q9P0L2,Q96EV8,P49407,Q9UL63,Q8NBU5,Q96PN6,Q8TD08,Q9HCU5,Q6I9Y2,Q9BW27,O43592,P05455,P29590,Q96RT1,Q9UID3,O15397,O60518,O95373,P04637,P52292,Q15648,Q8N1F7,Q96P70,Q9UI26,Q9Y5L0,P38646,Q9UIA9,O60725,P41743,P09132,P37108,P49458,P46379,P49754,Q709C8,O43933,Q99797,Q16795,P02792,P02794,Q9UJS0,P50416,P30825,Q15758,O43747,O60749,Q13596,Q92572,…
2	GO:0065007	biological regulation	Biological Process	346	P52292,O75419,O94874,Q96RU2,Q99459,Q9UMS4,P32780,P50613,Q9BZE4,Q07002,O75367,O96028,P04637,P16403,P18847,P27635,P35251,P42224,P49711,P52952,Q09028,Q15022,Q15648,Q15910,Q32MZ4,Q4G0J3,Q7L2J0,Q8TF47,Q96EB6,Q96IZ0,Q96T58,Q9BQ70,Q9UDR5,Q9UMX1,Q9Y3T9,Q9Y4B6,Q9Y6Q3,P01111,P10398,P27361,P62258,Q7Z569,O43159,O60264,Q9UIF9,Q01780,Q504Q3,Q5TAX3,Q9UIV1,Q06265,Q9H2H9,P06748,P42345,Q6IAA8,O00425,Q9NZI8,P19525,…
2	GO:0110148	biomineralization	Biological Process	2	Q14596,Q6P4Q7
3	GO:0019953	sexual reproduction	Biological Process	28	Q96EB6,Q5TAX3,Q16531,Q8NI77,P30153,Q9Y4F3,Q9BXW9,P42345,O00507,P20226,P46379,Q16181,Q4G0J3,Q8IXK0,Q8NB90,Q96PN6,Q96SI9,Q9H6S0,Q9UMX1,Q9Y2H6,P17987,P49368,P50990,P50991,P78371,Q99832,P62753,Q96SB4
3	GO:0032504	multicellular organism reproduction	Biological Process	24	Q96EB6,Q5TAX3,Q16531,Q8NI77,P30153,Q9Y4F3,Q9BXW9,P42345,O00507,P20226,P46379,Q16181,Q4G0J3,Q8IXK0,Q8NB90,Q96PN6,Q96SI9,Q9H6S0,Q9UMX1,Q9Y2H6,P62753,Q96SB4,P35520,Q15648
3	GO:0001776	leukocyte homeostasis	Biological Process	4	P62753,P30153,P67775,Q99576
3	GO:0002200	somatic diversification of immune receptors	Biological Process	7	Q8WYA6,P20585,P49917,Q9Y4B6,P78527,Q96QE3,O96028
3	GO:0002252	immune effector process	Biological Process	11	P42345,P04637,P62753,Q9NR30,P07437,O43747,P49917,Q96QE3,O96028,Q96EB6,Q08722
3	GO:0002253	activation of immune response	Biological Process	7	P78527,P46379,P19174,Q13144,Q14232,Q96IZ0,Q08722
3	GO:0002262	myeloid cell homeostasis	Biological Process	9	O94874,P38646,Q15758,Q86XI2,P62847,P42224,P78527,Q15648,P62753
3	GO:0002440	production of molecular mediator of immune response	Biological Process	8	Q9NR30,Q8WYA6,P20585,P49917,P78527,Q96QE3,O96028,Q96EB6
3	GO:0002520	immune system development	Biological Process	33	P04637,Q56NI9,P42345,P78527,P49917,Q8WYA6,P20585,P52952,P29590,Q02880,Q15910,Q9Y4B6,O94874,P38646,Q15758,Q86XI2,Q6IAN0,Q15648,Q96EB6,O94887,P62753,Q38SD2,Q96QE3,Q86U86,Q9BXW9,Q96QR8,P42224,P35268,O96028,P27361,O95376,Q15020,P19525
3	GO:0002682	regulation of immune system process	Biological Process	32	P78527,P46379,Q9NR30,Q96EB6,P19174,P27361,Q96IZ0,Q96QE3,P42345,Q6SZW1,O15111,Q9Y6K5,O14730,P30825,O43747,Q9H1D9,Q9NW08,Q86U86,Q9BXW9,Q96QR8,P38646,P42224,Q15648,O00743,O96028,Q13144,Q14232,Q08722,Q9UIV1,Q99576,Q96RT1,Q7Z2W4
3	GO:0002683	negative regulation of immune system process	Biological Process	9	P19174,Q96IZ0,O00743,P78527,Q9UIV1,Q9Y6K5,Q99576,P38646,Q08722
3	GO:0002684	positive regulation of immune system process	Biological Process	20	P78527,P46379,Q9NR30,Q96EB6,P27361,Q96QE3,P42345,P30825,O43747,O14730,Q9H1D9,Q9NW08,Q86U86,O96028,P19174,Q13144,Q14232,Q96IZ0,Q08722,Q15648
3	GO:0006955	immune response	Biological Process	47	P78527,Q8WYA6,Q9H2X3,P42345,P04637,P62753,P46379,Q9NR30,Q96EB6,P19174,Q6SZW1,O15111,P42224,Q9Y6K5,O14730,P07437,O43747,O00743,O95373,P29590,P57088,P78362,Q13325,Q7Z2W4,Q92974,Q96SB4,Q9BUZ4,Q9H1D9,Q9NRW3,Q9NVU0,Q9NW08,P49917,Q96QE3,O96028,Q13144,Q14232,Q96IZ0,Q15648,Q9UIV1,P62888,Q96RT1,P40429,Q08722,P19525,O75569,P02794,Q06265
3	GO:0019882	antigen processing and presentation	Biological Process	1	Q9H2X3
3	GO:0031294	lymphocyte costimulation	Biological Process	1	P42345
3	GO:0045058	T cell selection	Biological Process	1	P42345
3	GO:0045321	leukocyte activation	Biological Process	19	Q96L92,P42345,P04637,P62753,P78527,P46379,Q02880,Q15910,Q9Y4B6,Q96IZ0,Q96QE3,P49917,P30825,O43747,Q86U86,Q9BXW9,P35268,O96028,Q08722
3	GO:0050900	leukocyte migration	Biological Process	4	P27361,P40429,Q9BW27,Q08722
3	GO:0007611	learning or memory	Biological Process	3	Q8NBU5,P78559,P42858
3	GO:0007622	rhythmic behavior	Biological Process	2	P04637,P42345
3	GO:0007626	locomotory behavior	Biological Process	2	Q15813,P42345
3	GO:0007631	feeding behavior	Biological Process	1	P50416
3	GO:0007638	mechanosensory behavior	Biological Process	2	P42858,Q96SI9
3	GO:0030534	adult behavior	Biological Process	1	Q15813
3	GO:0048266	behavioral response to pain	Biological Process	1	P42345
3	GO:0050795	regulation of behavior	Biological Process	1	P42345
3	GO:0006734	NADH metabolic process	Biological Process	2	P43304,P04637
3	GO:0006739	NADP metabolic process	Biological Process	2	P04637,P42345
3	GO:0006807	nitrogen compound metabolic process	Biological Process	404	P49917,Q96EB6,P52292,P32780,P50613,Q9BZE4,Q07002,Q16762,O75367,O96028,P04637,P16403,P18847,P27635,P35251,P42224,P49711,P52952,Q09028,Q15022,Q15648,Q15910,Q32MZ4,Q4G0J3,Q7L2J0,Q8TF47,Q96IZ0,Q96T58,Q9BQ70,Q9UDR5,Q9UMX1,Q9Y3T9,Q9Y4B6,Q9Y6Q3,Q6IN84,Q9H0A0,Q01780,O95376,Q149N8,Q9UMS4,Q15020,P78362,Q96SB4,Q504Q3,Q5TAX3,Q9UIV1,Q9UBW8,O75934,Q12872,O75475,O43660,P11142,Q13523,Q8WYA6,Q99459,Q9HCG8,Q9Y388,…
3	GO:0009056	catabolic process	Biological Process	100	O95817,Q7Z3C6,Q16762,Q01780,Q504Q3,Q5TAX3,Q9UIV1,P04637,P50851,Q06265,Q96PN6,A8K9U1,O95376,P46379,P49407,P62256,Q13564,Q15843,Q16531,Q562E7,Q9UJX2,Q9Y4X5,Q9H8Y5,O60502,P15104,Q9HCC0,Q9UDR5,P35520,P11310,P28288,P50416,Q66K74,Q9P253,Q9UID3,Q9Y5X3,P19174,Q9NRW3,Q9UMS4,Q8TD08,P42345,Q08379,O94874,Q6ZN17,Q8NDF8,Q9NZI8,P49754,Q14596,Q96EB6,Q9UI12,Q9UNH7,P43304,Q6SZW1,P11021,P27824,Q8IXB1,Q96CS3,Q13042,…
3	GO:0009058	biosynthetic process	Biological Process	263	Q07002,O75367,O96028,P04637,P16403,P18847,P27635,P35251,P42224,P49711,P52952,Q09028,Q15022,Q15648,Q15910,Q32MZ4,Q4G0J3,Q7L2J0,Q8TF47,Q96EB6,Q96IZ0,Q96T58,Q9BQ70,Q9UDR5,Q9UMX1,Q9Y3T9,Q9Y4B6,Q9Y6Q3,Q504Q3,Q5TAX3,Q9UIV1,Q15054,Q53T94,Q9UIF9,P05386,P05387,P05388,P15880,P18077,P18124,P18621,P26373,P30050,P35268,P36578,P39023,P40429,P42766,P46776,P46777,P46778,P46779,P46781,P47914,P49207,P50914,P61247,…
3	GO:0009892	negative regulation of metabolic process	Biological Process	99	O75367,O96028,P04637,P16403,P18847,P27635,P35251,P42224,P49711,P52952,Q09028,Q15022,Q15648,Q15910,Q32MZ4,Q4G0J3,Q7L2J0,Q8TF47,Q96EB6,Q96IZ0,Q96T58,Q9BQ70,Q9UDR5,Q9UMX1,Q9Y3T9,Q9Y4B6,Q9Y6Q3,O43159,O60264,Q9UIF9,Q01780,Q504Q3,Q5TAX3,Q9UIV1,Q06265,P78527,Q12923,Q8IXB1,Q9BT40,Q9UNH7,Q9BZE4,P42345,Q08379,Q9NZI8,Q86VI3,Q9P0L2,Q9UER7,Q14738,Q9NR30,O00425,P19338,P19525,P40429,P67809,Q2Q1W2,O75569,Q6ZN17,…
3	GO:0009893	positive regulation of metabolic process	Biological Process	142	Q504Q3,Q5TAX3,Q9UIV1,P19525,P27361,P49407,Q86VI3,Q96EB6,Q96EV8,Q9UER7,Q9NR30,Q92688,Q9NZJ7,Q9UKL3,O94874,P38398,P04637,P18847,P42345,P46777,P49711,P52952,P78362,Q15648,Q8WZ42,Q96IZ0,Q9P0L2,Q96PN6,O60264,Q9UIF9,O43159,P29590,P06748,P11021,P50416,Q9BVP2,P17987,P40227,P49368,P50990,P50991,P78371,Q8TD08,Q99832,O95376,Q15370,Q9Y4X5,Q7Z2W4,O15111,P42224,O14730,Q9H1D9,Q9NW08,Q9Y6K5,O60216,Q92974,Q02952,…
3	GO:0019222	regulation of metabolic process	Biological Process	217	P52292,P32780,P50613,Q9BZE4,Q07002,O75367,O96028,P04637,P16403,P18847,P27635,P35251,P42224,P49711,P52952,Q09028,Q15022,Q15648,Q15910,Q32MZ4,Q4G0J3,Q7L2J0,Q8TF47,Q96EB6,Q96IZ0,Q96T58,Q9BQ70,Q9UDR5,Q9UMX1,Q9Y3T9,Q9Y4B6,Q9Y6Q3,O43159,O60264,Q9UIF9,Q01780,Q504Q3,Q5TAX3,Q9UIV1,Q06265,O00425,Q9NZI8,P19525,Q6IAA8,P67775,P78527,Q12923,Q8IXB1,Q9BT40,P27361,P49407,Q86VI3,Q96EV8,Q9UER7,Q9NR30,P11310,P30153,…
3	GO:0019674	NAD metabolic process	Biological Process	3	P43304,P04637,O75367
3	GO:0032259	methylation	Biological Process	22	Q6IN84,B2RD09,Q7L2J0,Q7Z2T5,P49711,Q15910,Q9UIF9,O60725,O60264,Q9H5U6,Q9UNQ2,Q93009,Q16531,P46087,Q96P11,Q9BVS5,Q75N03,Q4G0J3,O43159,O96028,Q99707,Q9NQV6
3	GO:0042445	hormone metabolic process	Biological Process	2	Q15648,Q9UBM7
3	GO:0044237	cellular metabolic process	Biological Process	424	P49917,Q96EB6,P52292,P28288,O95817,Q7Z3C6,P32780,P50613,Q9BZE4,Q07002,Q16762,O75367,O96028,P04637,P16403,P18847,P27635,P35251,P42224,P49711,P52952,Q09028,Q15022,Q15648,Q15910,Q32MZ4,Q4G0J3,Q7L2J0,Q8TF47,Q96IZ0,Q96T58,Q9BQ70,Q9UDR5,Q9UMX1,Q9Y3T9,Q9Y4B6,Q9Y6Q3,Q6IN84,Q9H0A0,Q01780,O95376,Q149N8,Q9UMS4,Q15020,P78362,Q96SB4,Q504Q3,Q5TAX3,Q9UIV1,Q9UBW8,O75934,Q12872,O75475,O43660,P11142,Q13523,Q8WYA6,…
3	GO:0044238	primary metabolic process	Biological Process	410	P49917,Q96EB6,P52292,P28288,P32780,P50613,Q9BZE4,Q07002,O75367,O96028,P04637,P16403,P18847,P27635,P35251,P42224,P49711,P52952,Q09028,Q15022,Q15648,Q15910,Q32MZ4,Q4G0J3,Q7L2J0,Q8TF47,Q96IZ0,Q96T58,Q9BQ70,Q9UDR5,Q9UMX1,Q9Y3T9,Q9Y4B6,Q9Y6Q3,Q6IN84,Q9H0A0,Q01780,O95376,Q149N8,Q9UMS4,Q15020,P78362,Q96SB4,Q504Q3,Q5TAX3,Q9UIV1,Q9UBW8,O75934,Q12872,O75475,O43660,P11142,Q13523,Q8WYA6,Q99459,Q9HCG8,Q9Y388,…
3	GO:0044281	small molecule metabolic process	Biological Process	41	P28288,Q16762,O95573,P50416,Q9BT40,Q9Y4D8,Q96PN6,Q9NPH2,Q06210,P18847,Q9UJS0,P11310,P43304,O15067,P42345,P49588,P08243,P35520,P15104,Q9H2H9,Q9HCC0,Q9UDR5,P42898,P38398,Q9UBM7,Q9BWM7,Q6IAN0,Q99707,Q9HAN9,Q6IA69,Q9NRW3,Q96EB6,P04637,Q6SZW1,Q9BQB6,Q16795,Q9Y2Z4,Q93009,Q16531,O60725,P67775
3	GO:0046034	ATP metabolic process	Biological Process	10	O75367,Q16795,Q9UJS0,P04637,P42345,P67775,Q9HAN9,Q96PN6,P11142,Q9NTK5
3	GO:0070085	glycosylation	Biological Process	6	Q08379,Q06210,O75352,O60502,Q8NAT1,Q14831
3	GO:0070988	demethylation	Biological Process	2	Q9NRW3,Q93009
3	GO:0071704	organic substance metabolic process	Biological Process	418	P49917,Q96EB6,P52292,P28288,P32780,P50613,Q9BZE4,Q07002,Q16762,O75367,O96028,P04637,P16403,P18847,P27635,P35251,P42224,P49711,P52952,Q09028,Q15022,Q15648,Q15910,Q32MZ4,Q4G0J3,Q7L2J0,Q8TF47,Q96IZ0,Q96T58,Q9BQ70,Q9UDR5,Q9UMX1,Q9Y3T9,Q9Y4B6,Q9Y6Q3,Q6IN84,Q9H0A0,O43159,O60264,Q9UIF9,Q01780,O95376,Q149N8,Q9UMS4,Q15020,P78362,Q96SB4,Q504Q3,Q5TAX3,Q9UIV1,Q9UBW8,O75934,Q12872,O75475,O43660,P11142,Q13523,…
3	GO:1990845	adaptive thermogenesis	Biological Process	1	Q6IAN0
3	GO:0001775	cell activation	Biological Process	21	Q96L92,P42345,P04637,P62753,P78527,P46379,Q02880,Q15910,Q9Y4B6,Q96IZ0,Q96QE3,P49917,Q02952,P30825,O43747,Q86U86,Q9BXW9,P35268,O96028,Q08722,Q9NUP1
3	GO:0001906	cell killing	Biological Process	3	P62888,P07437,O43747
3	GO:0006457	protein folding	Biological Process	20	Q15813,Q9BTW9,P11021,P27824,Q8IXB1,P11142,P17066,P38646,Q9NXW2,P78371,P17987,P40227,P49368,P50990,P50991,Q99832,O75352,O95817,Q13427,Q5F1R6
3	GO:0006903	vesicle targeting	Biological Process	4	Q8TD08,Q9HCU5,O00743,O15498
3	GO:0006928	movement of cell or subcellular component	Biological Process	56	Q01518,P62258,Q02880,Q8NAT1,Q9P0L2,Q9NYC9,Q96PN6,A0A6Q8PFA6,Q14807,Q8NI77,Q92845,Q96Q89,Q8TER5,Q96F07,Q9BPU6,P78537,Q8TDH9,Q92572,Q96EV8,Q9NUP1,Q9GZM8,P15104,P19174,P27361,P29590,Q14155,Q92839,O00507,P41743,P57737,Q08722,Q9NYB9,Q9Y2A7,Q13459,O00160,Q9UL16,P04899,P11021,Q75N03,Q09028,Q8TD08,Q9BZE4,P83731,Q96EB6,P42858,Q66K74,P40429,Q9BW27,P42345,Q02952,Q9BQS8,Q9UBF2,O95817,P78559,P11142,Q92974
3	GO:0007017	microtubule-based process	Biological Process	49	P42858,Q9GZM8,P07437,P68366,P78559,Q15813,Q3KQU3,Q66K74,Q7Z4H7,Q9BQE3,Q9BTW9,Q9P0L2,Q9NYC9,Q96PN6,A0A6Q8PFA6,Q14807,Q8NI77,Q92845,Q96Q89,Q08379,Q92974,Q9H3R5,Q16531,O94927,P06748,P38398,Q5VU43,Q9BT25,P78537,Q8TDH9,Q92572,Q96EV8,Q9NUP1,O14980,Q96EB6,Q9H0A0,Q9UL16,Q96BD8,Q8IYT4,Q9BXS6,P30153,O43933,Q9BQS8,Q9UBF2,O95817,Q8TD08,Q14155,P11142,Q9NYZ3
3	GO:0007049	cell cycle	Biological Process	105	Q86XI2,Q8NI77,Q9BXS6,O75419,O94874,Q96RU2,Q99459,Q9UMS4,P32780,P50613,Q9BZE4,O00743,P62753,Q13617,Q15910,Q2Q1W2,Q86VI3,Q07002,P42858,Q9GZM8,O75717,P07437,P67775,P68366,Q14807,Q86U86,Q96BD8,Q9BQE3,Q9BTW9,Q9NVX2,Q9UJX2,Q02880,Q96AY2,P04637,P29590,P61254,Q13362,Q9NYZ3,Q15813,Q66K74,Q9H3R5,Q16531,O60216,Q9H4I0,Q56NI9,Q9NTI5,Q8WZ42,Q96Q89,P38398,Q9NXR7,O94927,P06748,Q08379,Q5VU43,Q7Z4H7,Q9BT25,Q9BXW9,…
3	GO:0007059	chromosome segregation	Biological Process	36	Q86XI2,Q8NI77,Q9BXS6,Q02880,Q96AY2,O60216,Q14807,Q9H4I0,Q56NI9,Q9NTI5,Q8WZ42,Q9UJX2,Q9BXW9,P46379,Q86U86,Q9UJX5,O75367,Q13042,Q9UJX3,Q9UJX4,P30153,Q66K74,P49711,Q96EB6,Q8TD08,O60264,O14730,P11387,P38398,Q71F23,Q8NFH4,Q96BD8,Q96SB4,Q9GZM8,Q9H3R5,Q9Y3D0
3	GO:0007154	cell communication	Biological Process	163	O75419,O94874,Q96RU2,Q99459,Q9UMS4,P01111,P10398,P27361,P62258,Q7Z569,P04637,Q96EV8,Q96DX7,P04899,P49407,Q15648,P46379,P29590,P61254,Q13362,Q9NYZ3,P11021,P38398,Q9NXR7,O15397,O43422,P06748,P35659,P40123,P78368,Q01518,Q02952,Q13564,Q14155,Q14738,Q6SZW1,Q8TF05,Q92845,Q96L92,Q96QZ7,Q96RT1,Q99961,Q9BPU6,Q9BUZ4,Q9UKL3,Q9UL63,Q9UMX1,P19174,Q9Y5X3,Q9UNH7,O00507,O15198,Q96EB6,Q9BT40,Q14831,P39086,Q9NQS5,…
3	GO:0007155	cell adhesion	Biological Process	23	Q9H2X3,Q9UL63,Q15582,Q75N03,Q9BTW9,Q9BZE4,Q08722,Q96QZ7,P29590,P30153,P67775,P42345,P30825,Q96IZ0,Q86U86,Q92845,Q14155,Q9NUP1,Q96F07,Q9Y2H6,O94887,Q92839,Q96RT1
3	GO:0007163	establishment or maintenance of cell polarity	Biological Process	9	P42858,Q9GZM8,Q96L92,P57737,P41743,Q96RT1,Q96Q89,P40123,Q01518
3	GO:0007165	signal transduction	Biological Process	152	O75419,O94874,Q96RU2,Q99459,Q9UMS4,P01111,P10398,P27361,P62258,Q7Z569,P04637,Q96DX7,P04899,P49407,Q15648,P46379,P29590,P61254,Q13362,Q9NYZ3,P11021,P38398,Q9NXR7,Q96QZ7,P19174,Q96RT1,Q9Y5X3,Q9UNH7,O00507,O15198,Q96EB6,Q02952,Q9BT40,Q14831,P39086,Q9NQS5,Q96T58,Q9NVX2,Q08722,O15111,Q9UER7,P42224,A7KAX9,Q86VI3,Q13459,Q92572,Q9GZM8,Q2Q1W2,O95817,Q9H0S4,Q9UKL3,P78527,Q96K76,P32780,Q9NZJ7,Q8WZ42,P35520,…
3	GO:0007272	ensheathment of neurons	Biological Process	3	P42345,Q96P11,Q13144
3	GO:0008037	cell recognition	Biological Process	7	P17987,P49368,P50990,P50991,P78371,Q99832,Q9H2X3
3	GO:0008219	cell death	Biological Process	79	P04637,Q9Y3T9,P52952,O60216,P27361,P29590,P30153,P42858,P46379,P49736,P49848,P61289,P67775,Q08722,Q16531,Q66K74,Q8N8D1,Q96F07,Q96IZ0,Q9BUZ4,Q9NXR7,Q9NZJ7,Q9Y2A7,P62753,O95817,Q9H0S4,Q9UER7,Q9UKL3,P38398,P78527,Q96K76,Q92845,Q96PN6,P11387,P41743,Q96EB6,Q13362,Q96QE3,Q96RU2,P39687,P42224,Q13564,Q92688,O43324,Q13144,Q14155,Q8WYA6,O94874,P06748,P08243,P10398,P11021,P19525,P27635,P35520,P38646,P42345,…
3	GO:0008283	cell population proliferation	Biological Process	61	Q14691,Q86XI2,Q9BRT9,Q9GZM8,P42224,P01111,Q96EB6,P04637,P62753,Q92845,O94874,P04899,P06748,P18847,P46087,P46781,P52952,P78362,Q08722,Q15022,Q15910,Q5TA31,Q8TD08,Q96Q89,Q9UIV1,O43324,O43422,O75569,P02794,P19525,P29590,P49711,P49848,Q09028,Q13362,Q86U86,Q9BZE4,Q9NTI5,Q9ULD5,Q15648,Q9NZI8,Q96IZ0,Q96QE3,Q86VI3,P30825,Q92974,Q9BVP2,P49917,P78527,P41743,O95376,Q15020,Q2Q1W2,P27361,P19174,O00541,P15104,…
3	GO:0016049	cell growth	Biological Process	15	P06748,P42345,Q6IAA8,Q06265,Q96K76,P04637,P29590,P30153,P38398,P67775,Q96PN6,O95376,Q92558,Q96F07,Q9GZM8
3	GO:0019725	cellular homeostasis	Biological Process	17	Q96EB6,P02792,P02794,P06748,Q9UI12,P29590,Q6P4Q7,P27361,P42858,Q9H2V7,P62760,O95817,P19174,P62258,Q8WWC4,P78559,Q96RR1
3	GO:0022402	cell cycle process	Biological Process	80	Q86XI2,Q8NI77,Q9BXS6,O75419,O94874,Q96RU2,Q99459,Q9UMS4,O00743,P62753,Q13617,Q15910,Q2Q1W2,Q86VI3,Q07002,P42858,Q9GZM8,Q02880,Q96AY2,P04637,P29590,P61254,Q13362,Q9NYZ3,Q15813,Q66K74,Q9H3R5,Q16531,O60216,Q14807,Q9H4I0,Q56NI9,Q9NTI5,Q8WZ42,Q9UJX2,Q96Q89,P38398,Q9NXR7,O94927,P06748,Q08379,Q5VU43,Q7Z4H7,Q9BT25,Q9BXW9,P46379,P30153,Q9Y4F3,P83731,O14980,Q96EB6,Q9H0A0,Q96K76,Q86U86,Q9UJX5,P78527,Q01831,…
3	GO:0022406	membrane docking	Biological Process	2	O15498,Q9P253
3	GO:0022412	cellular process involved in reproduction in multicellular organism	Biological Process	13	Q5TAX3,Q16531,Q8NI77,P30153,Q9Y4F3,P42345,Q96PN6,Q96SI9,Q9H6S0,Q9UMX1,Q9Y2H6,P62753,Q96SB4
3	GO:0030029	actin filament-based process	Biological Process	29	O00160,P40123,P41743,Q01518,Q92974,Q9NYB9,O94887,P11171,Q13643,Q92558,Q96EV8,Q9BT40,Q9UL63,P57737,Q13459,Q8WZ42,Q96F07,P42345,Q9Y2A7,A0A0A0MRA8,Q9Y613,Q9NQA3,Q2M389,P49407,Q96IZ0,Q08722,P52952,Q96PN6,Q86VI3
3	GO:0032196	transposition	Biological Process	2	Q9HCE1,Q9NRW3
3	GO:0033059	cellular pigmentation	Biological Process	6	Q8TDH9,O43747,P78537,Q96EV8,Q9NUP1,Q92572
3	GO:0035212	cell competition in a multicellular organism	Biological Process	1	Q9Y4B6
3	GO:0043335	protein unfolding	Biological Process	1	O43933
3	GO:0045103	intermediate filament-based process	Biological Process	4	A0A590UJG2,Q96RT1,Q7Z3Y8,Q9GZM8
3	GO:0048522	positive regulation of cellular process	Biological Process	191	Q504Q3,Q5TAX3,Q9UIV1,P27361,P49407,Q86VI3,Q96EB6,Q96EV8,Q9UER7,P01111,Q96DX7,P42224,Q8NBU5,Q92688,Q9NZJ7,Q9UKL3,O94874,P04899,P06748,P18847,P46087,P46781,P52952,P62753,P78362,Q08722,Q15022,Q15910,Q5TA31,Q8TD08,Q96Q89,P42345,Q9NYB9,Q9Y2A7,P19174,P04637,Q96PN6,Q02952,Q14155,P41743,Q96QZ7,Q06265,Q96K76,P11021,Q75N03,Q96QE3,O60264,Q9UIF9,O43159,P29590,Q9NVN8,P38398,P42858,P50416,Q6IAA8,Q9BVP2,P17987,…
3	GO:0048523	negative regulation of cellular process	Biological Process	159	O75419,O94874,Q96RU2,Q99459,Q9UMS4,O75367,O96028,P04637,P16403,P18847,P27635,P35251,P42224,P49711,P52952,Q09028,Q15022,Q15648,Q15910,Q32MZ4,Q4G0J3,Q7L2J0,Q8TF47,Q96EB6,Q96IZ0,Q96T58,Q9BQ70,Q9UDR5,Q9UMX1,Q9Y3T9,Q9Y4B6,Q9Y6Q3,Q504Q3,Q5TAX3,Q9UIV1,P78527,Q12923,Q8IXB1,Q9BT40,P49407,P29590,P61254,Q13362,Q9NYZ3,Q92974,P38398,Q9NXR7,Q15582,Q75N03,Q9Y5X3,Q9UNH7,Q92845,Q9BZE4,O43324,O43422,O75569,P02794,…
3	GO:0048869	cellular developmental process	Biological Process	115	Q5TAX3,P52952,O94874,Q9BQG0,Q9BZE4,Q9NR30,Q9P2E9,P62258,Q02880,Q8NAT1,Q9P0L2,Q9NVX2,Q15582,P04637,Q56NI9,P42345,P78527,P49917,P42224,Q96PN6,Q96SI9,Q9H6S0,Q9UMX1,Q9Y2H6,Q92845,P78559,Q66K74,Q8TER5,Q96F07,Q9BPU6,Q15910,P67775,Q9GZM8,P41743,Q13144,Q14232,Q96P11,Q13428,Q9H9Y6,O94887,P62753,P29590,O15198,P46379,P61247,P78362,Q16181,Q4G0J3,Q6SZW1,Q8NB90,O60941,O95573,P28370,Q9Y4B6,Q15648,P38646,Q15758,…
3	GO:0050794	regulation of cellular process	Biological Process	321	P52292,O75419,O94874,Q96RU2,Q99459,Q9UMS4,P32780,P50613,Q9BZE4,Q07002,O75367,O96028,P04637,P16403,P18847,P27635,P35251,P42224,P49711,P52952,Q09028,Q15022,Q15648,Q15910,Q32MZ4,Q4G0J3,Q7L2J0,Q8TF47,Q96EB6,Q96IZ0,Q96T58,Q9BQ70,Q9UDR5,Q9UMX1,Q9Y3T9,Q9Y4B6,Q9Y6Q3,P01111,P10398,P27361,P62258,Q7Z569,Q504Q3,Q5TAX3,Q9UIV1,P06748,P42345,Q6IAA8,P67775,P78527,Q12923,Q8IXB1,Q9BT40,P49407,Q86VI3,Q96EV8,Q9UER7,…
3	GO:0051301	cell division	Biological Process	30	Q9BXS6,Q08379,Q9BVP2,Q96Q89,P11387,P67809,Q92974,Q16181,Q86VI3,O60216,O94927,P04899,P07437,P11171,P49917,P50613,Q13042,Q7Z4H7,Q86XI2,Q8NDF8,Q8NFH4,Q96BD8,Q9BQE3,Q9BT25,Q9NTI5,Q9NXR7,Q9UJX2,Q9UJX3,Q9UJX4,Q9UJX5
3	GO:0051641	cellular localization	Biological Process	135	O14980,P06748,P42858,Q9GZM8,Q96EV8,Q8TD08,Q9HCU5,Q6I9Y2,Q9BW27,O43592,P05455,P29590,P62258,Q96RT1,Q9UID3,O15397,O60518,O95373,P04637,P52292,Q15648,Q8N1F7,Q96P70,Q9UI26,Q9Y5L0,P38646,Q9UIA9,O60725,P41743,P09132,P37108,P49458,P46379,P49754,Q709C8,O43933,Q99797,Q9UJS0,P50416,P02792,P02794,O43747,O60749,Q13596,Q92572,Q92974,Q96L92,Q9P253,Q9UBF2,Q9UNH7,Q9Y5X3,O15498,Q08379,Q9Y6D5,P57737,Q7Z3U7,P39687,…
3	GO:0051651	maintenance of location in cell	Biological Process	8	P02792,P02794,P42858,P11021,Q709C8,P19174,P29590,Q96EB6
3	GO:0051674	localization of cell	Biological Process	33	Q01518,P62258,Q02880,Q8NAT1,Q9P0L2,P15104,P19174,P27361,P29590,Q14155,Q92839,O00507,P41743,P57737,Q08722,Q9GZM8,Q9NYB9,Q9Y2A7,Q9UL16,P04899,P11021,Q75N03,Q09028,Q8TD08,Q9BZE4,Q96EB6,P40429,Q9BW27,P42345,Q9NYC9,Q02952,Q92974,Q96Q89
3	GO:0051716	cellular response to stimulus	Biological Process	201	P49917,Q96EB6,O75419,O94874,Q96RU2,Q99459,Q9UMS4,P01111,P10398,P27361,P62258,Q7Z569,Q01831,P38398,P49736,Q9BRT9,Q15054,P04637,Q96DX7,P04899,P49407,Q15648,P46379,O60264,O75367,O75717,P06748,P20585,P32780,P35250,P35251,P50613,Q13112,Q14807,Q149N8,Q16531,Q96K58,P49848,Q9NXR7,Q93009,Q96K76,O60216,O96028,P78527,Q56NI9,Q96AY2,Q9Y4F3,Q9BQB6,P42345,Q13564,Q8TD08,P29590,P61254,Q13362,Q9NYZ3,P11021,O15397,…
3	GO:0055085	transmembrane transport	Biological Process	19	Q9H2H9,P50416,Q9BT40,Q9UJS0,P28288,O43933,P11021,P42858,Q16762,Q9H0U6,Q8WWC4,P41743,P19174,P30825,Q9UI12,Q15758,Q9BWM7,P62258,Q96PN6
3	GO:0061842	microtubule organizing center localization	Biological Process	2	Q9GZM8,Q9Y613
3	GO:0061919	process utilizing autophagic mechanism	Biological Process	25	O95817,Q7Z3C6,P04637,P50851,Q66K74,Q9P253,Q9UID3,Q8TD08,P42345,Q08379,O94874,P49754,Q14596,Q96EB6,Q9UI12,Q9UNH7,Q9Y5X3,Q562E7,P11142,P27361,Q9BQS8,Q96PN6,P42858,Q709C8,Q15042
3	GO:0071840	cellular component organization or biogenesis	Biological Process	295	P05388,P27635,P46087,P46777,P62750,P83731,Q02878,Q14137,Q9NVX2,Q9Y3A4,O95817,Q7Z3C6,O14980,P06748,Q86XI2,Q8NI77,Q9BXS6,P42858,Q9GZM8,Q6IN84,Q9H0A0,O43159,O60264,Q96EB6,Q9UIF9,P07437,P68366,P78559,Q15813,Q3KQU3,Q66K74,Q7Z4H7,Q9BQE3,Q9BTW9,Q9P0L2,Q15020,Q9UMS4,P78362,Q96SB4,O75475,Q12872,P04637,P50851,Q9Y324,O95478,P78527,Q01780,Q9H9Y2,O15213,P62241,Q8IY37,Q969X6,Q9H583,Q9NQZ2,O00541,P18124,P42766,…
3	GO:0097194	execution phase of apoptosis	Biological Process	2	P04637,Q9HAN9
3	GO:0140029	exocytic process	Biological Process	2	O15498,Q9P253
3	GO:0140352	export from cell	Biological Process	18	Q96EV8,Q9NQA3,Q9Y6D5,O15498,Q9P253,P27824,Q9HCU5,Q9UBF2,Q15758,Q14831,P62760,O43747,P04899,Q8WZ42,P50416,Q15042,P62258,Q4J6C6
3	GO:0019042	viral latency	Biological Process	1	P49917
3	GO:0019043	establishment of viral latency	Biological Process	1	P49917
3	GO:0019058	viral life cycle	Biological Process	17	Q9H2X3,Q16531,P35659,P11142,Q9H6S0,P78362,Q96SB4,Q9UIV1,P19525,Q13325,Q7Z2W4,Q9NRW3,Q9Y6K5,Q9BT40,Q02880,Q9P253,P52292
3	GO:0019076	viral release from host cell	Biological Process	1	Q16531
3	GO:0019079	viral genome replication	Biological Process	15	P11142,Q9H6S0,P78362,Q16531,Q96SB4,Q9UIV1,P19525,Q13325,Q7Z2W4,Q9NRW3,Q9Y6K5,Q9BT40,Q02880,P35659,Q9H2X3
3	GO:0019080	viral gene expression	Biological Process	4	P27824,Q4G0J3,Q9BT40,P05455
3	GO:0019081	viral translation	Biological Process	1	P05455
3	GO:0019082	viral protein processing	Biological Process	1	P27824
3	GO:0019083	viral transcription	Biological Process	2	Q4G0J3,Q9BT40
3	GO:0044794	positive regulation by host of viral process	Biological Process	2	P11142,Q9H6S0
3	GO:0046794	transport of virus	Biological Process	2	Q9H2X3,P52292
3	GO:0048524	positive regulation of viral process	Biological Process	6	P78362,Q16531,Q96SB4,Q9UIV1,Q02880,P52292
3	GO:0048525	negative regulation of viral process	Biological Process	10	Q4G0J3,P19525,P78362,Q13325,Q7Z2W4,Q96SB4,Q9NRW3,Q9Y6K5,Q9BT40,P42224
3	GO:0050792	regulation of viral process	Biological Process	14	Q4G0J3,P78362,Q16531,Q96SB4,Q9UIV1,P19525,Q13325,Q7Z2W4,Q9NRW3,Q9Y6K5,Q9BT40,Q02880,P42224,P52292
3	GO:0075522	IRES-dependent viral translational initiation	Biological Process	1	P05455
3	GO:0003006	developmental process involved in reproduction	Biological Process	25	Q13144,Q96EB6,Q5TAX3,P62753,Q15648,P42345,O00507,P20226,P46379,Q16181,Q4G0J3,Q8IXK0,Q8NB90,Q96PN6,Q96SI9,Q9H6S0,Q9UMX1,Q9Y2H6,Q96SB4,P78527,Q16531,Q9Y4F3,Q8NI77,P30153,Q8IY37
3	GO:0007566	embryo implantation	Biological Process	2	P47914,Q9H9Y6
3	GO:0009566	fertilization	Biological Process	7	P17987,P49368,P50990,P50991,P78371,Q99832,Q9Y2H6
3	GO:0022602	ovulation cycle process	Biological Process	1	Q96EB6
3	GO:0035036	sperm-egg recognition	Biological Process	6	P17987,P49368,P50990,P50991,P78371,Q99832
3	GO:0044703	multi-organism reproductive process	Biological Process	5	Q9H2H9,P47914,Q9H9Y6,P35520,Q15648
3	GO:0048609	multicellular organismal reproductive process	Biological Process	24	Q96EB6,Q5TAX3,Q16531,Q8NI77,P30153,Q9Y4F3,Q9BXW9,P42345,O00507,P20226,P46379,Q16181,Q4G0J3,Q8IXK0,Q8NB90,Q96PN6,Q96SI9,Q9H6S0,Q9UMX1,Q9Y2H6,P62753,Q96SB4,P35520,Q15648
3	GO:0051321	meiotic cell cycle	Biological Process	19	Q02880,Q96AY2,Q16531,Q9BXW9,P46379,O60216,Q8NI77,P30153,Q9Y4F3,Q13042,Q9UJX2,Q9UJX3,Q9UJX4,Q9UJX5,Q9H6S0,Q08379,Q8TD08,P67775,Q9H4I0
3	GO:0097722	sperm motility	Biological Process	1	Q9UL16
3	GO:1903046	meiotic cell cycle process	Biological Process	11	Q02880,Q96AY2,Q16531,Q9BXW9,P46379,O60216,Q8NI77,P30153,Q9Y4F3,Q08379,Q8TD08
3	GO:2000241	regulation of reproductive process	Biological Process	10	Q13042,Q9UJX2,Q9UJX3,Q9UJX4,Q9UJX5,Q9H6S0,P30153,Q8TD08,Q8IY37,Q16531
3	GO:2000242	negative regulation of reproductive process	Biological Process	1	Q16531
3	GO:2000243	positive regulation of reproductive process	Biological Process	3	Q9H6S0,Q8TD08,Q8IY37
3	GO:0007267	cell-cell signaling	Biological Process	27	Q96EV8,P04899,P39086,Q14831,P78368,Q16531,Q9P0L2,P30153,P67775,Q9H2H9,P62760,P78559,Q15042,P50416,P19174,P27361,Q02952,Q15910,Q8NBU5,B7ZLD0,P52952,Q38SD2,Q96K76,Q9NVX2,O60941,Q4J6C6,Q9P253
3	GO:0023051	regulation of signaling	Biological Process	97	Q6IAA8,Q96EV8,Q96DX7,P49407,Q9Y5X3,Q9UNH7,Q9NZJ7,Q7Z569,Q02952,P35520,P30153,P67775,P04637,P11021,Q09028,Q96EB6,P42858,P10398,Q9Y6D5,Q9H2H9,P27361,Q14596,P19525,Q13610,O94874,P38398,Q9P253,Q15648,Q6SZW1,Q13459,Q92974,P57737,P62760,O14730,Q9BUZ4,O15111,Q13325,Q7Z2W4,Q9NR30,P42224,Q15910,Q9BT40,Q86VI3,Q9HAN9,P06748,O43324,P41743,Q6NW34,Q9UMX1,Q7Z3E5,P19338,Q92610,P04899,P78559,Q15042,P50416,P19174,…
3	GO:0023056	positive regulation of signaling	Biological Process	45	Q96EV8,Q96DX7,Q02952,P42858,Q6IAA8,P19525,Q15648,P49407,P57737,P62760,O15111,Q13325,Q7Z2W4,Q9NR30,Q15910,Q86VI3,Q9HAN9,O43324,P41743,Q6NW34,Q7Z3E5,Q9BUZ4,P04899,Q96EB6,Q9Y5X3,Q92558,Q96F07,P42345,Q8N1F7,Q15042,P27361,P78368,Q38SD2,Q96K76,Q9NVX2,P29590,P61927,P61254,Q96PN6,P57088,P18847,P30153,O75569,P04637,P49848
3	GO:0023057	negative regulation of signaling	Biological Process	40	P49407,Q9Y5X3,Q9UNH7,Q7Z569,P04637,P11021,Q09028,Q96EB6,P38398,Q9P253,Q6SZW1,O14730,P30153,P67775,P42224,Q9BT40,Q9UMX1,P19338,Q92610,P62760,Q15910,P04899,Q96IZ0,Q8NBU5,Q9UIV1,Q9Y6K5,P18847,Q96RT1,P42345,P52952,Q92974,Q96QE3,Q96K76,O94874,P27361,Q93009,Q08722,P42858,P61289,Q9Y3T9
3	GO:0035637	multicellular organismal signaling	Biological Process	3	P42345,P62258,P52952
3	GO:0001503	ossification	Biological Process	11	O94874,Q9BQG0,Q9BZE4,Q9NR30,Q9P2E9,P35520,P27361,Q14596,O95373,Q9UMX1,Q96PN6
3	GO:0001763	morphogenesis of a branching structure	Biological Process	2	P29590,Q15648
3	GO:0001816	cytokine production	Biological Process	22	O00425,Q9NZI8,P19525,Q9NR30,P38398,Q7Z2W4,Q08722,O60216,P29590,P49407,O15111,P42224,O14730,Q9H1D9,Q9NW08,Q9Y6K5,Q92974,Q02952,Q9Y6D5,Q96EB6,Q96RT1,Q15910
3	GO:0002532	production of molecular mediator involved in inflammatory response	Biological Process	1	Q15910
3	GO:0003008	system process	Biological Process	33	O15111,P62258,Q8WZ42,P49407,Q15582,Q6P4Q7,Q14831,Q8NBU5,P78559,P42224,Q96PN6,Q15813,Q15910,P42345,P27361,P04899,Q9BT40,P42858,Q02952,Q9Y5X3,P52952,P49588,Q9NUP1,Q96P11,Q9Y575,Q15042,Q9NYC9,Q9UL16,P35520,P30825,Q15758,Q9H2H9,P11171
3	GO:0007275	multicellular organism development	Biological Process	138	Q13428,P15104,P19338,P78362,Q08722,Q15582,Q15648,Q96EB6,Q13144,P52952,P04637,P19174,P49917,Q8TCT9,Q9BT40,P78527,Q9NVX2,P62258,Q02880,Q8NAT1,Q9P0L2,P46379,P26373,Q6DKI1,Q9Y3A4,Q14691,Q86XI2,Q9BRT9,Q9GZM8,P42898,Q2Q1W2,Q96Q89,Q9UMX1,P11310,P62753,Q92688,P35520,Q56NI9,P42345,O96028,P42224,Q9Y483,O00425,P39086,Q14155,Q14738,Q66K74,Q6SZW1,Q99707,Q9BPU6,Q9NYB9,Q9NZI8,Q92845,P78559,Q8TER5,Q96F07,Q7L2E3,…
3	GO:0007389	pattern specification process	Biological Process	8	P04637,P78527,Q9NVX2,P52952,Q9UMX1,Q9Y483,Q06587,Q9UL16
3	GO:0007585	respiratory gaseous exchange by respiratory system	Biological Process	2	Q9NYC9,Q9BUZ4
3	GO:0007586	digestion	Biological Process	1	P11171
3	GO:0008340	determination of adult lifespan	Biological Process	1	P04637
3	GO:0009791	post-embryonic development	Biological Process	3	P11310,P42345,Q15813
3	GO:0019827	stem cell population maintenance	Biological Process	7	P49917,Q9BXW9,Q9NZI8,Q09028,Q5TAX3,Q9BVP2,Q9Y483
3	GO:0022404	molting cycle process	Biological Process	3	O94887,Q7Z3Y8,Q5C9Z4
3	GO:0032922	circadian regulation of gene expression	Biological Process	5	P11387,P29590,Q06210,Q96EB6,Q9BQG0
3	GO:0033555	multicellular organismal response to stress	Biological Process	1	P42345
3	GO:0035264	multicellular organism growth	Biological Process	2	P04637,P42345
3	GO:0035265	organ growth	Biological Process	1	P52952
3	GO:0042303	molting cycle	Biological Process	3	O94887,Q7Z3Y8,Q5C9Z4
3	GO:0044706	multi-multicellular organism process	Biological Process	5	Q9H2H9,P47914,Q9H9Y6,P35520,Q15648
3	GO:0048771	tissue remodeling	Biological Process	4	P35520,P04637,Q38SD2,P29590
3	GO:0048871	multicellular organismal homeostasis	Biological Process	5	Q38SD2,O43159,Q96EB6,Q6IAN0,Q9BT40
3	GO:0050817	coagulation	Biological Process	3	Q96EV8,Q9BQB6,Q9NUP1
3	GO:0050879	multicellular organismal movement	Biological Process	3	O15111,P42345,P78559
3	GO:0051239	regulation of multicellular organismal process	Biological Process	62	O00425,Q9NZI8,P19525,Q9NR30,P62258,P42224,P04637,Q92845,P38398,P15104,Q96PN6,P19174,P42345,Q15910,P67775,Q9P0L2,Q16181,P29590,Q9BQB6,P27361,Q14596,Q96P11,Q7Z2W4,Q08722,O60216,P49407,O15111,O14730,Q9H1D9,Q9NW08,Q9Y6K5,Q92974,Q02952,Q9Y6D5,Q86VI3,Q96EB6,Q86U86,Q9BXW9,O75367,Q15648,P78527,Q96QR8,P38646,P52952,P46379,O96028,Q96QE3,P49917,Q96T58,Q9BPU6,Q9Y575,O94874,P41743,Q96RT1,Q6IAN0,P04899,O95373,…
3	GO:0051240	positive regulation of multicellular organismal process	Biological Process	35	P19525,Q9NR30,P38398,Q96PN6,P42345,Q15910,Q7Z2W4,O15111,P42224,O14730,Q9H1D9,Q9NW08,Q9Y6K5,O60216,Q92974,Q02952,Q9Y6D5,Q86VI3,Q86U86,O75367,Q15648,P78527,P19174,Q96EB6,P52952,O96028,Q96QE3,P49917,Q96T58,Q9BQB6,O94874,P41743,Q09028,Q8IY37,Q9BT40
3	GO:0051241	negative regulation of multicellular organismal process	Biological Process	17	P04637,Q92845,P67775,Q9P0L2,P29590,P42224,O60216,P49407,Q9Y6K5,Q15910,Q9BPU6,Q96RT1,Q96PN6,P04899,Q09028,P38646,Q12923
3	GO:0071827	plasma lipoprotein particle organization	Biological Process	1	O95573
3	GO:0090130	tissue migration	Biological Process	4	P15104,P19174,Q96EB6,P42345
3	GO:0009653	anatomical structure morphogenesis	Biological Process	75	P40123,Q01518,Q15020,Q15648,Q92974,Q96F07,Q9Y2A7,P15104,P19338,P78362,Q08722,Q15582,Q96EB6,P52952,P04637,P78527,Q9NVX2,Q6DKI1,Q9Y3A4,P42898,Q2Q1W2,Q96Q89,Q9UMX1,P35520,P42345,O96028,P42224,P62753,P78559,Q02880,Q66K74,Q8TER5,Q9BPU6,Q9UL63,Q13428,Q9H9Y6,Q16181,P29590,P11021,Q9GZM8,Q8WZ42,Q7Z3Y8,P83731,Q8TDH9,P41743,O75569,P27361,P19174,P38398,Q96PN6,Q06587,P67809,Q9BTW9,Q96EV8,Q6SZW1,Q9BXW9,Q9UID3,…
3	GO:0021700	developmental maturation	Biological Process	8	Q5TAX3,O94887,O43747,Q8TDH9,Q9NZJ7,Q5C9Z4,Q9UI12,P30153
3	GO:0048532	anatomical structure arrangement	Biological Process	1	P11021
3	GO:0048589	developmental growth	Biological Process	14	Q14691,Q86XI2,Q9BRT9,Q9GZM8,Q15910,P04637,P42345,Q96PN6,O95376,P52952,Q15648,Q92558,Q96F07,Q15813
3	GO:0048646	anatomical structure formation involved in morphogenesis	Biological Process	27	P15104,P19338,P78362,Q08722,Q15582,Q15648,Q96EB6,P04637,P78527,Q9NVX2,Q6DKI1,Q9Y3A4,P42898,Q2Q1W2,Q96Q89,Q9UMX1,P52952,Q13428,Q9H9Y6,P29590,P42224,Q8WZ42,P19174,P38398,P27361,Q6P4Q7,O75367
3	GO:0048856	anatomical structure development	Biological Process	166	P40123,Q01518,Q15020,Q15648,Q92974,Q96F07,Q9Y2A7,Q13428,P15104,P19338,P78362,Q08722,Q15582,Q96EB6,Q13144,Q5TAX3,P52952,P04637,P19174,P49917,Q8TCT9,Q9BT40,P78527,Q9NVX2,P62258,Q02880,Q8NAT1,Q9P0L2,P46379,P26373,Q6DKI1,Q9Y3A4,Q14691,Q86XI2,Q9BRT9,Q9GZM8,P42898,Q2Q1W2,Q96Q89,Q9UMX1,P11310,P62753,Q92688,P35520,Q56NI9,P42345,O96028,P42224,Q96PN6,Q96SI9,Q9H6S0,Q9Y2H6,Q9Y483,O00425,P39086,Q14155,Q14738,…
3	GO:0050793	regulation of developmental process	Biological Process	53	P42224,P04637,Q92845,Q9UL63,P42345,Q15910,P67775,Q9P0L2,P52952,Q16181,P29590,Q14596,Q96P11,Q86VI3,Q09028,Q86U86,Q9BXW9,P30153,Q15022,Q92688,Q96EB6,O75367,Q15648,P78527,Q96QR8,P38646,Q6NW34,Q92974,O95373,Q9UMX1,P19174,P38398,Q96PN6,P46379,O96028,Q96QE3,Q6SZW1,P49917,Q96T58,Q9BPU6,Q8TDH9,Q16531,O94874,P41743,Q9NYB9,Q96EV8,Q9HCE1,Q14155,P19525,P15104,Q12923,Q8IY37,Q13610
3	GO:0051093	negative regulation of developmental process	Biological Process	22	P42224,P04637,Q92845,P67775,Q9P0L2,P52952,P29590,Q15022,Q92688,Q96EB6,Q15910,P38646,Q15648,Q6NW34,O95373,Q14596,Q9UMX1,Q9BPU6,Q96EV8,Q09028,Q12923,Q16531
3	GO:0051094	positive regulation of developmental process	Biological Process	27	P42345,Q15910,Q86VI3,Q86U86,O75367,Q15648,P78527,P42224,P52952,Q92974,P19174,P38398,Q96EB6,Q96PN6,O96028,Q96QE3,P49917,Q96T58,Q8TDH9,P29590,O94874,P41743,Q14155,O95373,Q09028,Q8IY37,Q13610
3	GO:0098727	maintenance of cell number	Biological Process	8	Q15910,Q5TAX3,Q9BVP2,Q9Y483,P49917,Q9BXW9,Q9NZI8,Q09028
3	GO:0040008	regulation of growth	Biological Process	13	P06748,P42345,Q6IAA8,Q06265,Q96K76,P04637,P29590,P30153,P38398,P67775,Q9Y4B6,Q96PN6,P52952
3	GO:0045926	negative regulation of growth	Biological Process	5	P04637,P29590,P30153,P38398,P67775
3	GO:0045927	positive regulation of growth	Biological Process	4	P42345,Q06265,Q96K76,Q96PN6
3	GO:0040012	regulation of locomotion	Biological Process	18	P15104,P19174,P27361,Q14155,Q92839,P04899,P11021,Q75N03,Q09028,Q8TD08,Q9BZE4,Q96EB6,P42345,Q9UL16,Q02952,Q08722,Q92974,Q96Q89
3	GO:0040013	negative regulation of locomotion	Biological Process	4	Q92839,Q09028,Q8TD08,Q9BZE4
3	GO:0040017	positive regulation of locomotion	Biological Process	12	P19174,P27361,Q14155,P04899,P11021,Q75N03,Q96EB6,P42345,Q02952,Q08722,Q92974,Q96Q89
3	GO:0042330	taxis	Biological Process	7	Q8TER5,Q96F07,Q9BPU6,P27361,P83731,P40429,Q9BW27
3	GO:0048870	cell motility	Biological Process	33	Q01518,P62258,Q02880,Q8NAT1,Q9P0L2,P15104,P19174,P27361,P29590,Q14155,Q92839,O00507,P41743,P57737,Q08722,Q9GZM8,Q9NYB9,Q9Y2A7,Q9UL16,P04899,P11021,Q75N03,Q09028,Q8TD08,Q9BZE4,Q96EB6,P40429,Q9BW27,P42345,Q9NYC9,Q02952,Q92974,Q96Q89
3	GO:0043476	pigment accumulation	Biological Process	2	O43747,Q8TDH9
3	GO:0048066	developmental pigmentation	Biological Process	2	O43747,Q8TDH9
3	GO:0120305	regulation of pigmentation	Biological Process	1	Q8TDH9
3	GO:0031640	killing of cells of another organism	Biological Process	1	P62888
3	GO:0044403	biological process involved in symbiotic interaction	Biological Process	8	Q9H2X3,Q16531,Q9BT40,P11142,Q9H6S0,Q9P253,Q6I9Y2,Q93009
3	GO:0051707	response to other organism	Biological Process	38	P78527,P29590,P42224,Q96DX7,O15111,O75569,P19525,Q7Z2W4,Q9Y6K5,P27361,P40429,Q02952,Q96RT1,O14730,P07437,O43747,Q9NRW3,O00743,O95373,P57088,P78362,Q13325,Q6SZW1,Q92974,Q96SB4,Q9BUZ4,Q9H1D9,Q9H2X3,Q9NR30,Q9NVU0,Q9NW08,Q8IZ81,P62888,Q9HCE1,Q9UIV1,P04637,Q15648,Q08722
3	GO:0007623	circadian rhythm	Biological Process	12	P11387,P29590,Q06210,Q96EB6,Q9BQG0,P42345,P78527,Q15910,Q16531,Q93009,P04637,Q16795
3	GO:0042698	ovulation cycle	Biological Process	1	Q96EB6
3	GO:0048087	positive regulation of developmental pigmentation	Biological Process	1	Q8TDH9
3	GO:0048584	positive regulation of response to stimulus	Biological Process	61	Q96DX7,P78527,P46379,Q96EB6,Q02952,P27361,P42858,Q6IAA8,P19525,Q15648,P49407,P57737,O15111,Q13325,Q7Z2W4,Q9NR30,O43747,Q15910,Q86VI3,Q9HAN9,O43324,O14730,Q9H1D9,Q9NW08,P38398,Q9NXR7,P41743,Q6NW34,Q7Z3E5,Q9BUZ4,P04899,Q9Y5X3,O96028,Q96QE3,Q08722,P19174,Q13144,Q14232,Q96IZ0,Q92558,Q96F07,P42345,Q8N1F7,P78368,Q38SD2,Q96K76,Q9NVX2,P29590,P61927,P61254,O75367,Q96PN6,P57088,P18847,Q86U86,Q02880,Q9UMX1,…
3	GO:0051050	positive regulation of transport	Biological Process	23	Q96EV8,P49407,Q8NBU5,P52952,Q96EB6,P42858,P62760,O95817,O95573,O43747,Q75N03,P41743,P62258,Q92688,Q8WZ42,Q08722,P19174,Q15042,Q96Q89,Q9H2H9,O95376,Q96PN6,Q9BT40
3	GO:0060148	positive regulation of post-transcriptional gene silencing	Biological Process	1	Q2Q1W2
3	GO:1903829	positive regulation of protein localization	Biological Process	27	P62760,O95817,O95573,P62258,Q92688,Q8WZ42,Q96Q89,Q6IAA8,O95373,P41743,O95376,Q96PN6,P06748,P11171,P29590,Q9BVP2,Q9NVN8,P17987,P40227,P49368,P50990,P50991,P78371,Q99832,Q4G0J3,Q7L2J0,P78559
3	GO:1904181	positive regulation of membrane depolarization	Biological Process	1	Q96PN6
3	GO:1904874	positive regulation of telomerase RNA localization to Cajal body	Biological Process	7	P17987,P40227,P49368,P50990,P50991,P78371,Q99832
3	GO:0048585	negative regulation of response to stimulus	Biological Process	43	P49407,P19174,Q9Y5X3,Q9UNH7,Q7Z569,P04637,P11021,Q09028,Q96EB6,P38398,Q9P253,Q6SZW1,O14730,P30153,P67775,P42224,Q9BT40,O00743,P78527,Q9UMX1,P19338,Q92610,Q15910,Q96IZ0,Q9UIV1,Q9Y6K5,P18847,Q96RT1,P42345,P52952,P04899,Q92974,Q96QE3,Q96K76,O75367,O94874,P27361,Q93009,Q709C8,Q08722,P42858,P61289,Q9Y3T9
3	GO:0051051	negative regulation of transport	Biological Process	8	Q9BT40,Q14831,Q9UMX1,Q9UKS6,P04899,P62760,P62258,Q08722
3	GO:0060149	negative regulation of post-transcriptional gene silencing	Biological Process	1	P04637
3	GO:0060967	negative regulation of gene silencing by RNA	Biological Process	1	P04637
3	GO:1903828	negative regulation of protein localization	Biological Process	6	Q9UMX1,P62760,Q9BT40,P42345,P78559,O75367
3	GO:0032879	regulation of localization	Biological Process	69	Q96EV8,Q9UL63,P49407,Q8NBU5,Q8TD08,Q9HCU5,P29590,P15104,P19174,P27361,Q14155,Q92839,P52952,Q9BT40,Q6IAA8,Q96EB6,P50416,Q14831,Q9UKS6,P04899,P11021,Q75N03,Q09028,Q9BZE4,P42858,O94874,Q9GZM8,P62760,O95817,Q9UMX1,O95573,O43747,P41743,O14980,P62258,Q92688,Q8WZ42,Q08722,P42345,P11171,Q9UL16,Q15042,Q02952,O96028,Q96Q89,Q96PN6,O95373,Q9H2H9,P78559,O95376,P11142,P06748,O75367,Q9BVP2,Q9NVN8,P17987,P40227,…
3	GO:0042752	regulation of circadian rhythm	Biological Process	7	P04637,P29590,P42345,P78527,Q15910,Q16531,Q93009
3	GO:0048583	regulation of response to stimulus	Biological Process	104	Q96DX7,P49407,P78527,P29590,P42224,P46379,Q96EB6,P19174,P38398,P49848,Q9NXR7,Q9Y5X3,Q9UNH7,Q9NZJ7,Q7Z569,Q96PN6,Q02952,P35520,P27361,P30153,P67775,Q9BQB6,P04637,P11021,Q09028,P42858,P10398,Q6IAA8,Q9Y6D5,Q14596,P19525,Q13610,O94874,Q9P253,Q15648,Q6SZW1,O15111,Q13459,Q92974,P57737,Q9Y6K5,O14730,Q9BUZ4,Q13325,Q7Z2W4,Q9NR30,O43747,Q15910,Q9BT40,Q86VI3,Q9HAN9,P06748,O43324,Q9H1D9,Q9NW08,P41743,Q6NW34,…
3	GO:0060306	regulation of membrane repolarization	Biological Process	2	P62258,Q96PN6
3	GO:0097006	regulation of plasma lipoprotein particle levels	Biological Process	1	O95573
3	GO:0110149	regulation of biomineralization	Biological Process	1	Q14596
3	GO:1900046	regulation of hemostasis	Biological Process	1	Q9BQB6
3	GO:0006950	response to stress	Biological Process	127	P49917,Q96EB6,O94874,Q96RU2,Q99459,Q9UMS4,Q01831,P38398,O75419,P49736,Q9BRT9,Q15054,O60216,P29590,P42898,P78527,P42224,Q96DX7,P19174,P04637,O60264,O75367,O75717,P06748,P20585,P32780,P35250,P35251,P50613,Q13112,Q14807,Q149N8,Q16531,Q96K58,P49848,Q9NXR7,Q93009,Q96K76,O96028,Q56NI9,Q96AY2,Q9Y4F3,O15111,P42345,Q08722,Q6IAN0,Q8NE71,Q99576,Q13564,Q8TD08,P61254,Q13362,Q9NYZ3,O75475,P11021,P11142,P17066,…
3	GO:0009605	response to external stimulus	Biological Process	71	P78527,P29590,P42224,Q96DX7,P19174,Q8TER5,Q96F07,Q9BPU6,P04899,P42345,Q96SI9,P11142,P15104,P49754,Q96EB6,O15111,O75569,P19525,Q7Z2W4,Q9Y6K5,P27361,Q01831,Q9BQB6,P83731,P50416,Q6IAA8,P40429,Q02952,Q96RT1,P42898,P18847,O43747,Q8TDH9,Q8WZ42,O14730,O43159,P04637,P08243,P11021,Q9BQG0,Q9Y4P3,P35520,P07437,P42858,P11310,Q9NRW3,O00743,O95373,P57088,P78362,Q13325,Q6SZW1,Q92974,Q96SB4,Q9BUZ4,Q9H1D9,Q9H2X3,…
3	GO:0009607	response to biotic stimulus	Biological Process	40	P78527,P29590,P42224,Q96DX7,P04637,P11021,O15111,O75569,P19525,Q7Z2W4,Q9Y6K5,P27361,P40429,Q02952,Q96RT1,O14730,P07437,O43747,Q9NRW3,O00743,O95373,P57088,P78362,Q13325,Q6SZW1,Q92974,Q96SB4,Q9BUZ4,Q9H1D9,Q9H2X3,Q9NR30,Q9NVU0,Q9NW08,Q8IZ81,P62888,Q9HCE1,Q9UIV1,Q15648,Q08722,Q96AY2
3	GO:0009628	response to abiotic stimulus	Biological Process	38	O60216,P29590,P42898,Q99576,Q96SI9,O75475,P42345,Q13144,Q14232,P11310,P42224,P04637,P49917,P38398,Q96RU2,Q9NXR7,Q01831,P78527,Q9BXW9,O95817,P17066,P62258,Q9UER7,P06748,P61254,Q16531,Q96K76,Q9Y3T9,Q8WZ42,P42858,Q02952,Q96EB6,P27361,Q9UKL3,P35520,Q9Y4P3,Q92974,Q15054
3	GO:0009719	response to endogenous stimulus	Biological Process	44	Q15648,O00507,O15198,P04637,P29590,Q96EB6,P27361,Q92572,Q9GZM8,Q2Q1W2,P32780,P11021,Q09028,Q9UNH7,Q8TDD1,Q9UER7,Q709C8,P41743,P42224,P42345,P78527,Q9BT40,O94874,P38398,Q9P253,Q15910,Q92839,Q13144,Q14232,P19338,Q92610,P04899,Q9Y5X3,Q8N8D1,Q96EV8,O15111,Q92974,Q6IAA8,Q02880,P19174,P11142,Q96AY2,P61353,Q92558
3	GO:0042221	response to chemical	Biological Process	105	Q96DX7,Q15648,Q9BQB6,P11142,P17066,Q96CS3,O00507,O15198,P04637,P29590,Q96EB6,P04899,Q8TER5,Q96F07,Q9BPU6,P42224,P42345,P27361,Q92572,Q9GZM8,Q2Q1W2,O15067,O15111,P11387,P28288,P42898,P50416,Q01831,Q96K76,P15104,Q13144,Q14232,Q6SZW1,P32780,P30153,P67775,P11021,P27824,P46379,Q8IXB1,Q9H8Y5,Q09028,Q9UNH7,Q8TDD1,Q9UER7,P18847,P19525,Q9Y4P3,P83731,Q15910,Q96RT1,P40429,Q02952,Q709C8,P41743,P78527,Q9BT40,…
3	GO:0043500	muscle adaptation	Biological Process	3	Q96PN6,Q15813,Q15910
3	GO:0051606	detection of stimulus	Biological Process	1	Q8WZ42
3	GO:0031503	protein-containing complex localization	Biological Process	5	O14980,P06748,Q96P70,Q8NBU5,P29590
3	GO:0033036	macromolecule localization	Biological Process	119	O14980,Q6I9Y2,Q9BW27,P06748,O43592,P05455,P29590,P62258,Q96RT1,Q9UID3,O15397,O60518,O95373,P04637,P52292,Q15648,Q8N1F7,Q96P70,Q9UI26,Q9Y5L0,P38646,Q9UIA9,O60725,P41743,P09132,P37108,P49458,P46379,P49754,Q709C8,O43933,Q99797,P50416,O43747,O60749,Q13596,Q92572,Q92974,Q96L92,Q9P253,Q9UBF2,Q9UNH7,Q9Y5X3,P50851,Q15843,Q6IAA8,Q92845,Q9UMS4,P27824,Q9HCU5,Q96EB6,O15498,P49407,P57737,Q08379,Q2M389,Q2VPB7,…
3	GO:0051234	establishment of localization	Biological Process	148	O14980,P06748,P42858,Q9GZM8,Q9H2H9,Q96EV8,P49407,Q9UL63,Q8NBU5,Q96PN6,Q8TD08,Q9HCU5,Q6I9Y2,Q9BW27,O43592,P05455,P29590,P62258,Q96RT1,Q9UID3,O15397,O60518,O95373,P04637,P52292,Q15648,Q8N1F7,Q96P70,Q9UI26,Q9Y5L0,P38646,Q9UIA9,O60725,P41743,P09132,P37108,P49458,P46379,P49754,Q709C8,O43933,Q99797,Q16795,P02792,P02794,Q9UJS0,P50416,P30825,Q15758,O43747,O60749,Q13596,Q92572,Q92974,Q96L92,Q9P253,Q9UBF2,…
3	GO:0051235	maintenance of location	Biological Process	9	P02792,P02794,P50416,Q96EB6,P42858,P11021,Q709C8,P19174,P29590
3	GO:0065008	regulation of biological quality	Biological Process	103	Q504Q3,Q5TAX3,Q9UIV1,Q9H2H9,Q96EB6,Q96EV8,P62258,Q15648,P02792,P02794,P06748,P62753,Q9UI12,Q9BQB6,Q9UL63,P42345,Q86VI3,P29590,Q9NZI8,Q96PN6,Q6P4Q7,Q9UBM7,Q16181,O94874,P38646,Q15758,Q86XI2,P27361,Q96F07,Q9Y2A7,P42858,P11142,P46379,Q93009,Q96RU2,Q9NVN8,P78527,Q8NDF8,P62847,Q9HCE1,Q9H2V7,P62760,P04637,P04899,Q9BT40,Q15910,P40429,Q9Y4D8,Q6IAA8,P30153,P67775,Q02952,Q9NP64,Q06265,Q38SD2,P42224,Q9Y5X3,…
3	GO:0065009	regulation of molecular function	Biological Process	58	P32780,P50613,Q9BZE4,Q9BT40,Q92688,Q9NZJ7,Q9UKL3,Q9UNH7,P40123,Q01518,P04899,P27361,P42858,P06748,Q96EB6,O15111,O94874,P49407,Q93009,Q96RT1,Q08379,Q9NVN8,P11171,P42345,Q8IXB1,Q8WXX5,Q15042,Q8TC07,Q96K76,Q15910,Q9UMX1,Q14155,Q9GZM8,O95373,Q8WZ42,Q9BUZ4,Q9UER7,P19525,P41743,Q92974,P20585,P04637,Q9NVH6,P15880,P17987,P50991,P78371,Q8TD08,P29590,Q9Y6K5,O75367,P67775,Q86X10,Q96F07,P35250,P62258,P46777,…
3	GO:0031214	biomineral tissue development	Biological Process	2	Q14596,Q6P4Q7
4	GO:0007276	gamete generation	Biological Process	22	Q96EB6,Q5TAX3,Q16531,Q8NI77,P30153,Q9Y4F3,P42345,O00507,P20226,P46379,Q16181,Q4G0J3,Q8IXK0,Q8NB90,Q96PN6,Q96SI9,Q9H6S0,Q9UMX1,Q9Y2H6,P62753,Q96SB4,Q9BXW9
4	GO:0002260	lymphocyte homeostasis	Biological Process	4	P62753,P30153,P67775,Q99576
4	GO:0002562	somatic diversification of immune receptors via germline recombination within a single locus	Biological Process	6	P20585,P49917,Q9Y4B6,P78527,Q96QE3,O96028
4	GO:0002568	somatic diversification of T cell receptor genes	Biological Process	2	P49917,P78527
4	GO:0016445	somatic diversification of immunoglobulins	Biological Process	6	P20585,P49917,P78527,Q96QE3,O96028,Q8WYA6
4	GO:0002263	cell activation involved in immune response	Biological Process	7	P42345,P04637,P62753,O43747,P49917,Q96QE3,O96028
4	GO:0002433	immune response-regulating cell surface receptor signaling pathway involved in phagocytosis	Biological Process	1	Q08722
4	GO:0002443	leukocyte mediated immunity	Biological Process	6	Q9NR30,P07437,O43747,P49917,Q96QE3,O96028
4	GO:0002697	regulation of immune effector process	Biological Process	6	Q9NR30,O43747,O96028,Q96QE3,Q96EB6,Q08722
4	GO:0002698	negative regulation of immune effector process	Biological Process	1	Q08722
4	GO:0002699	positive regulation of immune effector process	Biological Process	5	Q9NR30,O43747,O96028,Q96QE3,Q96EB6
4	GO:0043299	leukocyte degranulation	Biological Process	1	O43747
4	GO:0002218	activation of innate immune response	Biological Process	1	P78527
4	GO:0002757	immune response-activating signal transduction	Biological Process	6	P46379,P19174,Q13144,Q14232,Q96IZ0,Q08722
4	GO:0034101	erythrocyte homeostasis	Biological Process	9	O94874,P38646,Q15758,Q86XI2,P42224,P78527,Q15648,P62753,P62847
4	GO:0002367	cytokine production involved in immune response	Biological Process	2	Q9NR30,Q96EB6
4	GO:0002377	immunoglobulin production	Biological Process	6	Q8WYA6,P20585,P49917,P78527,Q96QE3,O96028
4	GO:0002700	regulation of production of molecular mediator of immune response	Biological Process	4	Q9NR30,O96028,Q96QE3,Q96EB6
4	GO:0002702	positive regulation of production of molecular mediator of immune response	Biological Process	4	Q9NR30,O96028,Q96QE3,Q96EB6
4	GO:0048534	hematopoietic or lymphoid organ development	Biological Process	29	P04637,Q56NI9,P42345,P78527,P49917,P52952,P29590,Q02880,Q15910,Q9Y4B6,O94874,P38646,Q15758,Q86XI2,Q6IAN0,Q15648,Q96EB6,O94887,P62753,Q38SD2,Q86U86,Q9BXW9,Q96QR8,P42224,P35268,P27361,O95376,Q15020,P19525
4	GO:0002685	regulation of leukocyte migration	Biological Process	2	P27361,Q08722
4	GO:0002694	regulation of leukocyte activation	Biological Process	10	Q96IZ0,Q96QE3,P42345,P30825,O43747,Q86U86,Q9BXW9,P78527,O96028,Q08722
4	GO:0050776	regulation of immune response	Biological Process	22	P78527,P46379,Q96EB6,P19174,Q6SZW1,O15111,Q9Y6K5,O14730,O43747,Q9H1D9,Q9NW08,O00743,O96028,Q96QE3,Q13144,Q14232,Q96IZ0,Q15648,Q9UIV1,Q96RT1,Q7Z2W4,Q08722
4	GO:0070235	regulation of activation-induced cell death of T cells	Biological Process	1	Q99576
4	GO:1903706	regulation of hemopoiesis	Biological Process	8	Q86U86,Q9BXW9,P78527,Q96QR8,P38646,P42224,Q15648,P42345
4	GO:0002695	negative regulation of leukocyte activation	Biological Process	1	Q96IZ0
4	GO:0050777	negative regulation of immune response	Biological Process	5	P19174,O00743,P78527,Q9UIV1,Q9Y6K5
4	GO:0050858	negative regulation of antigen receptor-mediated signaling pathway	Biological Process	1	Q96IZ0
4	GO:0070236	negative regulation of activation-induced cell death of T cells	Biological Process	1	Q99576
4	GO:1903707	negative regulation of hemopoiesis	Biological Process	1	P38646
4	GO:0002687	positive regulation of leukocyte migration	Biological Process	2	P27361,Q08722
4	GO:0002696	positive regulation of leukocyte activation	Biological Process	8	Q96QE3,P42345,P30825,O43747,Q86U86,P78527,O96028,Q08722
4	GO:0050778	positive regulation of immune response	Biological Process	15	P78527,P46379,Q96EB6,O43747,O14730,Q9H1D9,Q9NW08,O96028,Q96QE3,P19174,Q13144,Q14232,Q96IZ0,Q15648,Q08722
4	GO:1903708	positive regulation of hemopoiesis	Biological Process	2	Q86U86,P78527
4	GO:0002250	adaptive immune response	Biological Process	7	P42345,Q96EB6,P49917,Q96QE3,O96028,Q8WYA6,Q9H2X3
4	GO:0002437	inflammatory response to antigenic stimulus	Biological Process	1	P19174
4	GO:0006959	humoral immune response	Biological Process	1	P62888
4	GO:0045087	innate immune response	Biological Process	30	P78527,P42224,P07437,O43747,O14730,Q9H1D9,Q9NW08,O00743,P04637,Q15648,Q9UIV1,Q9Y6K5,P40429,Q08722,P19525,O15111,O95373,P29590,P57088,P78362,Q13325,Q6SZW1,Q7Z2W4,Q92974,Q96SB4,Q9BUZ4,Q9H2X3,Q9NR30,Q9NRW3,Q9NVU0
4	GO:0048002	antigen processing and presentation of peptide antigen	Biological Process	1	Q9H2X3
4	GO:0031295	T cell costimulation	Biological Process	1	P42345
4	GO:0043368	positive T cell selection	Biological Process	1	P42345
4	GO:0002366	leukocyte activation involved in immune response	Biological Process	7	P42345,P04637,P62753,O43747,P49917,Q96QE3,O96028
4	GO:0046649	lymphocyte activation	Biological Process	19	Q96L92,P42345,P04637,P62753,P78527,P46379,Q02880,Q15910,Q9Y4B6,Q96IZ0,Q96QE3,P49917,P30825,O43747,Q86U86,Q9BXW9,P35268,O96028,Q08722
4	GO:0030595	leukocyte chemotaxis	Biological Process	3	P27361,P40429,Q9BW27
4	GO:0045123	cellular extravasation	Biological Process	1	Q08722
4	GO:0071674	mononuclear cell migration	Biological Process	2	P27361,Q08722
4	GO:0097529	myeloid leukocyte migration	Biological Process	4	P27361,P40429,Q9BW27,Q08722
4	GO:0007612	learning	Biological Process	3	P78559,P42858,Q8NBU5
4	GO:0007613	memory	Biological Process	2	P78559,Q8NBU5
4	GO:0098598	learned vocalization behavior or vocal learning	Biological Process	1	P42858
4	GO:0048512	circadian behavior	Biological Process	2	P42345,P04637
4	GO:0008344	adult locomotory behavior	Biological Process	1	Q15813
4	GO:0045475	locomotor rhythm	Biological Process	1	P42345
4	GO:0042755	eating behavior	Biological Process	1	P50416
4	GO:0031223	auditory behavior	Biological Process	1	P42858
4	GO:1904059	regulation of locomotor rhythm	Biological Process	1	P42345
4	GO:0006116	NADH oxidation	Biological Process	1	P43304
4	GO:0019661	glucose catabolic process to lactate via pyruvate	Biological Process	1	P04637
4	GO:0006740	NADPH regeneration	Biological Process	2	P04637,P42345
4	GO:1902031	regulation of NADP metabolic process	Biological Process	2	P04637,P42345
4	GO:0034641	cellular nitrogen compound metabolic process	Biological Process	334	P49917,Q96EB6,P52292,Q07002,O75367,O96028,P04637,P16403,P18847,P27635,P35251,P42224,P49711,P52952,Q09028,Q15022,Q15648,Q15910,Q32MZ4,Q4G0J3,Q7L2J0,Q8TF47,Q96IZ0,Q96T58,Q9BQ70,Q9UDR5,Q9UMX1,Q9Y3T9,Q9Y4B6,Q9Y6Q3,Q6IN84,Q9H0A0,Q01780,Q15020,Q9UMS4,P78362,Q96SB4,Q504Q3,Q5TAX3,Q9UIV1,O75934,Q12872,O75475,O43660,P11142,Q13523,Q8WYA6,Q99459,Q9HCG8,Q9Y388,Q9Y324,Q14137,O95478,P78527,Q9H9Y2,O15213,P62241,…
4	GO:0051171	regulation of nitrogen compound metabolic process	Biological Process	199	P52292,P32780,P50613,Q9BZE4,Q07002,O75367,O96028,P04637,P16403,P18847,P27635,P35251,P42224,P49711,P52952,Q09028,Q15022,Q15648,Q15910,Q32MZ4,Q4G0J3,Q7L2J0,Q8TF47,Q96EB6,Q96IZ0,Q96T58,Q9BQ70,Q9UDR5,Q9UMX1,Q9Y3T9,Q9Y4B6,Q9Y6Q3,Q504Q3,Q5TAX3,Q9UIV1,P67775,P78527,Q12923,Q8IXB1,Q9BT40,P27361,P49407,Q86VI3,Q96EV8,Q9UER7,O60264,P30153,Q56NI9,Q9NRL2,P38398,P49848,Q9NXR7,O95625,P28370,P29590,P67809,Q02878,…
4	GO:0051172	negative regulation of nitrogen compound metabolic process	Biological Process	87	O75367,O96028,P04637,P16403,P18847,P27635,P35251,P42224,P49711,P52952,Q09028,Q15022,Q15648,Q15910,Q32MZ4,Q4G0J3,Q7L2J0,Q8TF47,Q96EB6,Q96IZ0,Q96T58,Q9BQ70,Q9UDR5,Q9UMX1,Q9Y3T9,Q9Y4B6,Q9Y6Q3,Q504Q3,Q5TAX3,Q9UIV1,P78527,Q12923,Q8IXB1,Q9BT40,Q9UNH7,Q9BZE4,Q14738,O60264,Q9NR30,Q9UIF9,O00425,P19338,P19525,P40429,P67809,Q2Q1W2,Q9NZI8,O94874,P49407,Q9NVN8,P29590,Q01780,Q8NDF8,Q9H0A0,P46379,P78559,Q93009,…
4	GO:0051173	positive regulation of nitrogen compound metabolic process	Biological Process	121	Q504Q3,Q5TAX3,Q9UIV1,P27361,P49407,Q86VI3,Q96EB6,Q96EV8,Q9UER7,Q92688,Q9NZJ7,Q9UKL3,Q96PN6,O60264,Q9UIF9,O43159,P29590,P06748,P11021,P38398,Q9BVP2,P17987,P40227,P49368,P50990,P50991,P78371,Q8TD08,Q99832,O95376,Q15370,Q9Y4X5,P42345,Q15648,Q9NPJ6,Q8WVV9,P10398,P35659,Q9BQG0,Q9NR30,Q9HCE1,Q14738,P04637,Q96IZ0,Q15910,Q06265,P05455,P46777,P61254,P78527,Q8NE71,Q96P11,Q9H0A0,Q9H5U6,Q16531,Q9Y4B6,Q9NXR7,…
4	GO:1901564	organonitrogen compound metabolic process	Biological Process	251	P32780,P50613,Q9BZE4,Q16762,O95376,Q149N8,Q9UMS4,Q504Q3,Q5TAX3,Q9UIV1,Q9UBW8,Q13427,P67775,P78527,Q12923,Q8IXB1,Q9BT40,P27361,P49407,Q86VI3,Q96EB6,Q96EV8,Q9UER7,P05386,P05387,P05388,P15880,P18077,P18124,P18621,P26373,P27635,P30050,P35268,P36578,P39023,P40429,P42766,P46776,P46777,P46778,P46779,P46781,P47914,P49207,P50914,P61247,P61254,P61353,P61927,P62241,P62266,P62280,P62424,P62750,P62753,P62847,…
4	GO:2001057	reactive nitrogen species metabolic process	Biological Process	1	Q08722
4	GO:0009894	regulation of catabolic process	Biological Process	50	Q504Q3,Q5TAX3,Q9UIV1,Q8TD08,P42345,Q08379,O94874,Q9NZI8,Q96EB6,Q9UI12,Q9UNH7,Q9Y5X3,P50416,O14980,P10398,P46379,P78559,Q93009,O95376,Q15370,Q9Y4X5,Q9HCE1,Q9NP64,Q06265,Q16531,Q9Y4B6,Q96PN6,P67809,Q6ZN17,Q86VM9,Q9UKS6,Q8NDF8,Q7Z2W4,P61289,Q2Q1W2,O00425,Q9BQS8,P04637,Q9HAN9,P06748,P42858,P27361,P67775,Q709C8,O95817,P29590,P46777,Q9UMX1,A7E2V4,Q15042
4	GO:0009895	negative regulation of catabolic process	Biological Process	16	P42345,Q08379,P46379,P78559,Q93009,Q9NP64,P67809,Q8NDF8,O00425,Q9NZI8,P04637,Q9HAN9,P67775,P29590,P46777,Q9UMX1
4	GO:0009896	positive regulation of catabolic process	Biological Process	30	Q504Q3,Q5TAX3,Q9UIV1,O94874,Q96EB6,P50416,O95376,Q15370,Q9Y4X5,Q9HCE1,Q06265,Q16531,Q9Y4B6,Q96PN6,P42345,Q6ZN17,Q86VM9,Q9UKS6,Q8NDF8,Q7Z2W4,Q2Q1W2,P67809,Q9NZI8,Q9BQS8,P42858,P46379,P27361,O95817,A7E2V4,Q15042
4	GO:0044248	cellular catabolic process	Biological Process	98	O95817,Q7Z3C6,Q16762,Q01780,Q504Q3,Q5TAX3,Q9UIV1,P04637,P50851,Q06265,A8K9U1,O95376,P46379,P49407,P62256,Q13564,Q15843,Q16531,Q562E7,Q9UJX2,Q9Y4X5,Q9H8Y5,O60502,P15104,Q9HCC0,Q9UDR5,P35520,P11310,P28288,P50416,Q66K74,Q9P253,Q9UID3,Q9Y5X3,P19174,Q9NRW3,Q9UMS4,Q8TD08,P42345,Q08379,O94874,Q6ZN17,Q8NDF8,Q9NZI8,P49754,Q14596,Q96EB6,Q9UI12,Q9UNH7,P43304,Q6SZW1,P11021,P27824,Q8IXB1,Q96CS3,Q13042,Q9UJX3,…
4	GO:0044282	small molecule catabolic process	Biological Process	12	Q16762,Q96PN6,P15104,Q9HCC0,Q9UDR5,P35520,P11310,P28288,P50416,Q9NRW3,P43304,P04637
4	GO:1901575	organic substance catabolic process	Biological Process	84	Q16762,Q01780,Q504Q3,Q5TAX3,Q9UIV1,Q06265,Q96PN6,A8K9U1,O95376,P46379,P49407,P62256,Q13564,Q15843,Q16531,Q562E7,Q9UJX2,Q9Y4X5,Q9H8Y5,O60502,P15104,Q9HCC0,Q9UDR5,P35520,P11310,P28288,P50416,Q9Y5X3,P19174,Q9NRW3,Q9UMS4,Q6ZN17,Q8NDF8,Q9NZI8,P43304,P04637,Q6SZW1,P42345,P11021,P27824,Q8IXB1,Q96CS3,Q13042,Q9UJX3,Q9UJX4,Q9UJX5,Q13617,O14980,O94874,P10398,P78559,Q93009,Q15370,Q9HCE1,Q9NXW2,A7E2V4,O94888,…
4	GO:0009889	regulation of biosynthetic process	Biological Process	150	Q07002,O75367,O96028,P04637,P16403,P18847,P27635,P35251,P42224,P49711,P52952,Q09028,Q15022,Q15648,Q15910,Q32MZ4,Q4G0J3,Q7L2J0,Q8TF47,Q96EB6,Q96IZ0,Q96T58,Q9BQ70,Q9UDR5,Q9UMX1,Q9Y3T9,Q9Y4B6,Q9Y6Q3,Q504Q3,Q5TAX3,Q9UIV1,Q9BT40,P11310,O60264,O95625,P28370,P29590,P30153,P67775,P67809,Q02878,Q969X6,Q99551,Q9BQG0,Q9NRL2,Q9UER7,Q9UIF9,Q9Y483,O15198,O60216,P35659,P38398,P49407,P49848,P51814,Q15776,Q15843,…
4	GO:0009890	negative regulation of biosynthetic process	Biological Process	64	O75367,O96028,P04637,P16403,P18847,P27635,P35251,P42224,P49711,P52952,Q09028,Q15022,Q15648,Q15910,Q32MZ4,Q4G0J3,Q7L2J0,Q8TF47,Q96EB6,Q96IZ0,Q96T58,Q9BQ70,Q9UDR5,Q9UMX1,Q9Y3T9,Q9Y4B6,Q9Y6Q3,Q504Q3,Q5TAX3,Q9UIV1,O60264,Q9NR30,Q9UIF9,O00425,P19338,P19525,P40429,P67809,Q2Q1W2,Q9NZI8,P29590,Q01780,Q8NDF8,Q9H0A0,Q9NVN8,Q9HCE1,Q06265,P38398,Q9BT40,Q93009,O43159,P11142,Q06587,Q8IXK0,Q96K76,Q9BQG0,Q9HAN9,…
4	GO:0009891	positive regulation of biosynthetic process	Biological Process	80	P17987,P27361,P40227,P49368,P50990,P50991,P78371,Q8TD08,Q99832,Q15648,Q9NPJ6,P04637,Q96IZ0,Q96EB6,Q16531,P05455,P06748,P42345,P46777,P61254,P78527,Q8NE71,Q96P11,Q9H0A0,Q9H5U6,O15111,P28370,P32780,P35251,P38398,P42224,P49711,P49848,P52952,Q01831,Q09028,Q5TA31,Q68DK7,Q8TF47,Q96DX7,Q9BT40,Q9BW27,Q9Y5X3,O60264,P17480,P35659,Q8TED0,Q9BQG0,Q9H583,Q9NR30,O75475,P18847,P19338,P49407,P50613,P67809,Q06265,…
4	GO:0042446	hormone biosynthetic process	Biological Process	2	Q15648,Q9UBM7
4	GO:0044249	cellular biosynthetic process	Biological Process	260	Q07002,O75367,O96028,P04637,P16403,P18847,P27635,P35251,P42224,P49711,P52952,Q09028,Q15022,Q15648,Q15910,Q32MZ4,Q4G0J3,Q7L2J0,Q8TF47,Q96EB6,Q96IZ0,Q96T58,Q9BQ70,Q9UDR5,Q9UMX1,Q9Y3T9,Q9Y4B6,Q9Y6Q3,Q504Q3,Q5TAX3,Q9UIV1,Q15054,Q53T94,Q9UIF9,P05386,P05387,P05388,P15880,P18077,P18124,P18621,P26373,P30050,P35268,P36578,P39023,P40429,P42766,P46776,P46777,P46778,P46779,P46781,P47914,P49207,P50914,P61247,…
4	GO:0044283	small molecule biosynthetic process	Biological Process	18	Q9NPH2,P18847,Q9UJS0,P11310,P08243,P35520,P15104,P28288,P38398,Q9UBM7,P42898,Q99707,Q9H2H9,Q9UDR5,Q96EB6,Q93009,Q16531,Q16795
4	GO:1901576	organic substance biosynthetic process	Biological Process	262	Q07002,O75367,O96028,P04637,P16403,P18847,P27635,P35251,P42224,P49711,P52952,Q09028,Q15022,Q15648,Q15910,Q32MZ4,Q4G0J3,Q7L2J0,Q8TF47,Q96EB6,Q96IZ0,Q96T58,Q9BQ70,Q9UDR5,Q9UMX1,Q9Y3T9,Q9Y4B6,Q9Y6Q3,Q504Q3,Q5TAX3,Q9UIV1,Q15054,Q53T94,Q9UIF9,P05386,P05387,P05388,P15880,P18077,P18124,P18621,P26373,P30050,P35268,P36578,P39023,P40429,P42766,P46776,P46777,P46778,P46779,P46781,P47914,P49207,P50914,P61247,…
4	GO:1903409	reactive oxygen species biosynthetic process	Biological Process	1	Q96PN6
4	GO:0010605	negative regulation of macromolecule metabolic process	Biological Process	96	O75367,O96028,P04637,P16403,P18847,P27635,P35251,P42224,P49711,P52952,Q09028,Q15022,Q15648,Q15910,Q32MZ4,Q4G0J3,Q7L2J0,Q8TF47,Q96EB6,Q96IZ0,Q96T58,Q9BQ70,Q9UDR5,Q9UMX1,Q9Y3T9,Q9Y4B6,Q9Y6Q3,O43159,O60264,Q9UIF9,Q01780,Q504Q3,Q5TAX3,Q9UIV1,Q06265,P78527,Q12923,Q8IXB1,Q9BT40,Q9UNH7,Q9BZE4,Q9NZI8,Q86VI3,Q9P0L2,Q9UER7,Q14738,Q9NR30,O00425,P19338,P19525,P40429,P67809,Q2Q1W2,O75569,Q6ZN17,O94874,P49407,…
4	GO:0031324	negative regulation of cellular metabolic process	Biological Process	90	O75367,O96028,P04637,P16403,P18847,P27635,P35251,P42224,P49711,P52952,Q09028,Q15022,Q15648,Q15910,Q32MZ4,Q4G0J3,Q7L2J0,Q8TF47,Q96EB6,Q96IZ0,Q96T58,Q9BQ70,Q9UDR5,Q9UMX1,Q9Y3T9,Q9Y4B6,Q9Y6Q3,Q504Q3,Q5TAX3,Q9UIV1,P78527,Q12923,Q8IXB1,Q9BT40,Q9UNH7,Q9BZE4,P42345,Q08379,Q14738,O60264,Q9NR30,Q9UIF9,O00425,P19338,P19525,P40429,P67809,Q2Q1W2,Q9NZI8,O94874,P49407,Q9NVN8,P29590,Q01780,Q8NDF8,Q9H0A0,P46379,…
4	GO:0045833	negative regulation of lipid metabolic process	Biological Process	2	Q96EB6,P38398
4	GO:0045912	negative regulation of carbohydrate metabolic process	Biological Process	4	Q9BT40,Q93009,P04637,P67775
4	GO:0062014	negative regulation of small molecule metabolic process	Biological Process	5	Q96EB6,P38398,Q93009,P04637,P67775
4	GO:1902689	negative regulation of NAD metabolic process	Biological Process	1	P04637
4	GO:1903579	negative regulation of ATP metabolic process	Biological Process	2	P04637,P67775
4	GO:0010604	positive regulation of macromolecule metabolic process	Biological Process	134	Q504Q3,Q5TAX3,Q9UIV1,P19525,P27361,P49407,Q86VI3,Q96EB6,Q96EV8,Q9UER7,Q9NR30,Q92688,Q9NZJ7,Q9UKL3,P38398,P04637,P18847,P42345,P46777,P49711,P52952,P78362,Q15648,Q8WZ42,Q96IZ0,Q9P0L2,Q96PN6,O60264,Q9UIF9,O43159,P29590,P06748,P11021,Q9BVP2,P17987,P40227,P49368,P50990,P50991,P78371,Q8TD08,Q99832,O95376,Q15370,Q9Y4X5,Q7Z2W4,O15111,P42224,O14730,Q9H1D9,Q9NW08,Q9Y6K5,O60216,Q92974,Q02952,Q9Y6D5,Q9NPJ6,…
4	GO:0031325	positive regulation of cellular metabolic process	Biological Process	127	Q504Q3,Q5TAX3,Q9UIV1,P27361,P49407,Q86VI3,Q96EB6,Q96EV8,Q9UER7,Q92688,Q9NZJ7,Q9UKL3,O94874,Q96PN6,O60264,Q9UIF9,O43159,P29590,P06748,P11021,P38398,P50416,Q9BVP2,P17987,P40227,P49368,P50990,P50991,P78371,Q8TD08,Q99832,O95376,Q15370,Q9Y4X5,P42345,P04899,Q15648,Q9NPJ6,Q8WVV9,P10398,P35659,Q9BQG0,Q9NR30,Q9HCE1,Q14738,P04637,Q96IZ0,Q15910,Q06265,Q16531,P05455,P46777,P61254,P78527,Q8NE71,Q96P11,Q9H0A0,…
4	GO:0045834	positive regulation of lipid metabolic process	Biological Process	3	P50416,P42345,O95573
4	GO:0045913	positive regulation of carbohydrate metabolic process	Biological Process	4	Q16531,Q96EB6,Q96PN6,P42345
4	GO:0062013	positive regulation of small molecule metabolic process	Biological Process	5	P50416,Q16531,Q96EB6,Q96PN6,P42345
4	GO:1903580	positive regulation of ATP metabolic process	Biological Process	2	P42345,Q96PN6
4	GO:0031323	regulation of cellular metabolic process	Biological Process	207	P52292,P32780,P50613,Q9BZE4,Q07002,O75367,O96028,P04637,P16403,P18847,P27635,P35251,P42224,P49711,P52952,Q09028,Q15022,Q15648,Q15910,Q32MZ4,Q4G0J3,Q7L2J0,Q8TF47,Q96EB6,Q96IZ0,Q96T58,Q9BQ70,Q9UDR5,Q9UMX1,Q9Y3T9,Q9Y4B6,Q9Y6Q3,Q504Q3,Q5TAX3,Q9UIV1,Q6IAA8,P67775,P78527,Q12923,Q8IXB1,Q9BT40,P27361,P49407,Q86VI3,Q96EV8,Q9UER7,P11310,O60264,P30153,Q56NI9,Q9NRL2,P38398,P49848,Q9NXR7,O95625,P28370,P29590,…
4	GO:0060255	regulation of macromolecule metabolic process	Biological Process	208	P52292,P32780,P50613,Q9BZE4,Q07002,O75367,O96028,P04637,P16403,P18847,P27635,P35251,P42224,P49711,P52952,Q09028,Q15022,Q15648,Q15910,Q32MZ4,Q4G0J3,Q7L2J0,Q8TF47,Q96EB6,Q96IZ0,Q96T58,Q9BQ70,Q9UDR5,Q9UMX1,Q9Y3T9,Q9Y4B6,Q9Y6Q3,O43159,O60264,Q9UIF9,Q01780,Q504Q3,Q5TAX3,Q9UIV1,Q06265,O00425,Q9NZI8,P19525,Q6IAA8,P67775,P78527,Q12923,Q8IXB1,Q9BT40,P27361,P49407,Q86VI3,Q96EV8,Q9UER7,Q9NR30,P30153,Q56NI9,…
4	GO:0062012	regulation of small molecule metabolic process	Biological Process	11	Q9BT40,P11310,Q96EB6,P50416,P38398,Q93009,Q16531,Q96PN6,P42345,P04637,P67775
4	GO:0080090	regulation of primary metabolic process	Biological Process	200	P52292,P32780,P50613,Q9BZE4,Q07002,O75367,O96028,P04637,P16403,P18847,P27635,P35251,P42224,P49711,P52952,Q09028,Q15022,Q15648,Q15910,Q32MZ4,Q4G0J3,Q7L2J0,Q8TF47,Q96EB6,Q96IZ0,Q96T58,Q9BQ70,Q9UDR5,Q9UMX1,Q9Y3T9,Q9Y4B6,Q9Y6Q3,Q504Q3,Q5TAX3,Q9UIV1,P67775,P78527,Q12923,Q8IXB1,Q9BT40,P27361,P49407,Q86VI3,Q96EV8,Q9UER7,P11310,O60264,P30153,Q56NI9,Q9NRL2,P38398,P49848,Q9NXR7,O95625,P28370,P29590,P67809,…
4	GO:0120161	regulation of cold-induced thermogenesis	Biological Process	1	Q6IAN0
4	GO:1902688	regulation of NAD metabolic process	Biological Process	2	P04637,O75367
4	GO:1903578	regulation of ATP metabolic process	Biological Process	5	O75367,P42345,P04637,P67775,Q96PN6
4	GO:0043414	macromolecule methylation	Biological Process	18	Q6IN84,B2RD09,Q7L2J0,Q7Z2T5,P49711,Q15910,Q9UIF9,O60725,O60264,Q9H5U6,Q9UNQ2,Q93009,Q16531,P46087,Q96P11,Q9BVS5,Q75N03,Q4G0J3
4	GO:0016131	brassinosteroid metabolic process	Biological Process	1	Q9UBM7
4	GO:0034754	cellular hormone metabolic process	Biological Process	1	Q15648
4	GO:0042403	thyroid hormone metabolic process	Biological Process	1	Q15648
4	GO:0006082	organic acid metabolic process	Biological Process	24	P28288,Q16762,O95573,P50416,P49588,P08243,P35520,P15104,O15067,Q06210,Q9H2H9,Q9HCC0,Q9UDR5,P42898,P38398,P11310,Q9UJS0,Q99707,P04637,Q96EB6,Q9Y2Z4,P42345,O60725,P67775
4	GO:0006091	generation of precursor metabolites and energy	Biological Process	16	O75367,I3L213,P46020,Q93100,P11310,Q9BT40,P42345,Q06210,Q16795,P43304,P78537,P04637,Q9BQG0,Q9UJS0,Q96PN6,P67775
4	GO:0006413	translational initiation	Biological Process	9	O60841,P29590,P42345,Q13144,P06748,P40429,P61247,Q14232,Q8NE71
4	GO:0006575	cellular modified amino acid metabolic process	Biological Process	7	Q15648,P50416,P11310,P42898,Q9NVH6,O60725,Q99707
4	GO:0006725	cellular aromatic compound metabolic process	Biological Process	265	P49917,Q96EB6,P52292,Q07002,O75367,O96028,P04637,P16403,P18847,P27635,P35251,P42224,P49711,P52952,Q09028,Q15022,Q15648,Q15910,Q32MZ4,Q4G0J3,Q7L2J0,Q8TF47,Q96IZ0,Q96T58,Q9BQ70,Q9UDR5,Q9UMX1,Q9Y3T9,Q9Y4B6,Q9Y6Q3,Q6IN84,Q9H0A0,Q01780,Q15020,Q9UMS4,P78362,Q96SB4,Q504Q3,Q5TAX3,Q9UIV1,O75934,Q12872,O75475,O43660,P11142,Q13523,Q8WYA6,Q99459,Q9HCG8,Q9Y388,Q9Y324,Q14137,O95478,P78527,Q9H9Y2,O15213,P62241,…
4	GO:0006730	one-carbon metabolic process	Biological Process	2	P42898,Q9BWM7
4	GO:0006790	sulfur compound metabolic process	Biological Process	9	Q16762,P35520,P42898,Q99707,P38646,Q9Y3D0,Q9UDR5,O95573,O60725
4	GO:0006793	phosphorus metabolic process	Biological Process	67	P32780,P50613,Q9BZE4,P67775,P78527,Q12923,Q8IXB1,Q9BT40,P27361,P49407,Q86VI3,Q96EB6,Q96EV8,Q9UER7,Q06210,P43304,O15067,Q96PN6,O15111,P19525,P41743,P42345,P78362,P78368,Q13523,Q8TF05,Q96SB4,Q9P0L2,O00743,P30153,P63151,Q14738,Q6IAN0,Q9UJS0,Q9UNH7,Q9NPH2,Q9HAN9,P19174,Q6IA69,Q9HCC0,O14730,P10398,P11387,Q07002,Q38SD2,Q8WZ42,Q9Y4B6,Q9NYB9,Q6SZW1,Q13610,Q9UDR5,O95573,Q9UIV1,Q16795,Q15910,P42858,P06748,…
4	GO:0006805	xenobiotic metabolic process	Biological Process	1	Q9BQB6
4	GO:0042180	cellular ketone metabolic process	Biological Process	6	P43304,Q96EB6,P50416,Q9BQB6,P38398,Q16795
4	GO:0044255	cellular lipid metabolic process	Biological Process	15	P28288,O95573,P50416,O75352,P38398,P11310,Q96EB6,Q6IAN0,Q9BT40,P30153,P67775,Q9NPH2,P19174,P78368,Q8IY17
4	GO:0044260	cellular macromolecule metabolic process	Biological Process	292	P49917,Q96EB6,P52292,P32780,P50613,Q9BZE4,Q01780,O95376,Q149N8,Q9UMS4,Q504Q3,Q5TAX3,Q9UIV1,Q9UBW8,Q13427,Q6IN84,Q02880,Q96AY2,Q01831,P78527,P38398,O75419,P49736,Q9BRT9,Q15054,Q06265,B2RD09,Q7L2J0,Q9Y6D5,Q6IAA8,P67775,Q12923,Q8IXB1,Q9BT40,P27361,P49407,Q86VI3,Q96EV8,Q9UER7,P05386,P05387,P05388,P15880,P18077,P18124,P18621,P26373,P27635,P30050,P35268,P36578,P39023,P40429,P42766,P46776,P46777,P46778,…
4	GO:0044262	cellular carbohydrate metabolic process	Biological Process	15	I3L213,P46020,Q93100,P11310,Q9BT40,Q9NPH2,Q96EB6,P43304,Q92839,Q93009,Q16531,Q96PN6,P04637,P67775,P42345
4	GO:0046483	heterocycle metabolic process	Biological Process	265	P49917,Q96EB6,P52292,Q07002,O75367,O96028,P04637,P16403,P18847,P27635,P35251,P42224,P49711,P52952,Q09028,Q15022,Q15648,Q15910,Q32MZ4,Q4G0J3,Q7L2J0,Q8TF47,Q96IZ0,Q96T58,Q9BQ70,Q9UDR5,Q9UMX1,Q9Y3T9,Q9Y4B6,Q9Y6Q3,Q6IN84,Q9H0A0,Q01780,Q15020,Q9UMS4,P78362,Q96SB4,Q504Q3,Q5TAX3,Q9UIV1,O75934,Q12872,O75475,O43660,P11142,Q13523,Q8WYA6,Q99459,Q9HCG8,Q9Y388,Q9Y324,Q14137,O95478,P78527,Q9H9Y2,O15213,P62241,…
4	GO:0072593	reactive oxygen species metabolic process	Biological Process	5	P35520,P04899,Q96PN6,P04637,P38398
4	GO:0090398	cellular senescence	Biological Process	8	Q96EB6,P29590,P04637,P67809,O43324,Q96IZ0,P06748,Q02880
4	GO:0090399	replicative senescence	Biological Process	1	P04637
4	GO:0005975	carbohydrate metabolic process	Biological Process	21	I3L213,P46020,Q93100,P11310,Q9BT40,P50416,Q9Y4D8,Q96PN6,Q9NPH2,P18847,Q9UJS0,O75352,Q96EB6,P43304,P04637,Q92839,Q93009,Q16531,P42345,P67775,Q96PB1
4	GO:0006139	nucleobase-containing compound metabolic process	Biological Process	263	P49917,Q96EB6,P52292,Q07002,O75367,O96028,P04637,P16403,P18847,P27635,P35251,P42224,P49711,P52952,Q09028,Q15022,Q15648,Q15910,Q32MZ4,Q4G0J3,Q7L2J0,Q8TF47,Q96IZ0,Q96T58,Q9BQ70,Q9UDR5,Q9UMX1,Q9Y3T9,Q9Y4B6,Q9Y6Q3,Q6IN84,Q9H0A0,Q01780,Q15020,Q9UMS4,P78362,Q96SB4,Q504Q3,Q5TAX3,Q9UIV1,O75934,Q12872,O75475,O43660,P11142,Q13523,Q8WYA6,Q99459,Q9HCG8,Q9Y388,Q9Y324,Q14137,O95478,P78527,Q9H9Y2,O15213,P62241,…
4	GO:0006520	cellular amino acid metabolic process	Biological Process	14	P49588,P08243,P35520,P15104,O15067,Q06210,Q9H2H9,Q9HCC0,Q9UDR5,P42898,Q9UJS0,Q99707,Q9Y2Z4,O60725
4	GO:0006629	lipid metabolic process	Biological Process	20	P28288,O95573,P50416,O75352,P38398,P11310,Q96EB6,Q6IAN0,Q9BT40,P30153,P67775,Q9UBM7,Q15648,Q9UMS4,Q9NPH2,P19174,O75367,P78368,Q8IY17,P42345
4	GO:0019538	protein metabolic process	Biological Process	229	P32780,P50613,Q9BZE4,O95376,Q149N8,Q9UMS4,Q504Q3,Q5TAX3,Q9UIV1,Q9UBW8,Q13427,P67775,P78527,Q12923,Q8IXB1,Q9BT40,P27361,P49407,Q86VI3,Q96EB6,Q96EV8,Q9UER7,P05386,P05387,P05388,P15880,P18077,P18124,P18621,P26373,P27635,P30050,P35268,P36578,P39023,P40429,P42766,P46776,P46777,P46778,P46779,P46781,P47914,P49207,P50914,P61247,P61254,P61353,P61927,P62241,P62266,P62280,P62424,P62750,P62753,P62847,P62888,…
4	GO:0005996	monosaccharide metabolic process	Biological Process	11	Q9BT40,P50416,Q9Y4D8,Q96PN6,P18847,Q9UJS0,P11310,Q96EB6,P04637,Q93009,Q16531
4	GO:0006066	alcohol metabolic process	Biological Process	3	Q9NPH2,P43304,Q9UBM7
4	GO:0006766	vitamin metabolic process	Biological Process	2	Q99707,Q9BQB6
4	GO:0018904	ether metabolic process	Biological Process	1	Q6IAN0
4	GO:0055086	nucleobase-containing small molecule metabolic process	Biological Process	15	Q06210,O15067,Q96PN6,P42345,Q9UJS0,Q9HAN9,Q6IA69,Q9NRW3,Q9HCC0,Q6SZW1,Q9UDR5,O95573,Q16795,O60725,P67775
4	GO:0006119	oxidative phosphorylation	Biological Process	2	O75367,Q16795
4	GO:0006754	ATP biosynthetic process	Biological Process	3	Q16795,Q96PN6,Q9UJS0
4	GO:0006757	ATP generation from ADP	Biological Process	2	P42345,P67775
4	GO:0019660	glycolytic fermentation	Biological Process	1	P04637
4	GO:1990966	ATP generation from poly-ADP-D-ribose	Biological Process	1	Q9HAN9
4	GO:0043413	macromolecule glycosylation	Biological Process	5	Q08379,Q06210,O75352,O60502,Q8NAT1
4	GO:0097502	mannosylation	Biological Process	1	Q8NAT1
4	GO:0080111	DNA demethylation	Biological Process	2	Q93009,Q9NRW3
4	GO:0019637	organophosphate metabolic process	Biological Process	20	Q06210,P43304,O15067,Q96PN6,Q6IAN0,Q9BT40,Q9UJS0,Q9NPH2,Q9HAN9,P19174,Q6IA69,Q9HCC0,Q6SZW1,Q9UDR5,O95573,Q16795,P42345,Q8IY17,P67775,P04637
4	GO:0035383	thioester metabolic process	Biological Process	2	Q9UDR5,O95573
4	GO:0043170	macromolecule metabolic process	Biological Process	396	P49917,Q96EB6,P52292,P32780,P50613,Q9BZE4,Q07002,O75367,O96028,P04637,P16403,P18847,P27635,P35251,P42224,P49711,P52952,Q09028,Q15022,Q15648,Q15910,Q32MZ4,Q4G0J3,Q7L2J0,Q8TF47,Q96IZ0,Q96T58,Q9BQ70,Q9UDR5,Q9UMX1,Q9Y3T9,Q9Y4B6,Q9Y6Q3,Q6IN84,Q9H0A0,O43159,O60264,Q9UIF9,Q01780,O95376,Q149N8,Q9UMS4,Q15020,P78362,Q96SB4,Q504Q3,Q5TAX3,Q9UIV1,Q9UBW8,O75934,Q12872,O75475,O43660,P11142,Q13523,Q8WYA6,Q99459,…
4	GO:0046500	S-adenosylmethionine metabolic process	Biological Process	1	P42898
4	GO:1901135	carbohydrate derivative metabolic process	Biological Process	21	Q06210,Q92839,O60502,P43304,Q96PN6,O15067,Q08379,O75352,Q8NAT1,Q9UJS0,Q9NRW3,Q9HCC0,Q9UDR5,O95573,Q16795,Q96IZ0,P42345,O60725,P67775,P04637,Q9HAN9
4	GO:1901360	organic cyclic compound metabolic process	Biological Process	267	P49917,Q96EB6,P52292,Q07002,O75367,O96028,P04637,P16403,P18847,P27635,P35251,P42224,P49711,P52952,Q09028,Q15022,Q15648,Q15910,Q32MZ4,Q4G0J3,Q7L2J0,Q8TF47,Q96IZ0,Q96T58,Q9BQ70,Q9UDR5,Q9UMX1,Q9Y3T9,Q9Y4B6,Q9Y6Q3,Q6IN84,Q9H0A0,Q01780,Q15020,Q9UMS4,P78362,Q96SB4,Q504Q3,Q5TAX3,Q9UIV1,O75934,Q12872,O75475,O43660,P11142,Q13523,Q8WYA6,Q99459,Q9HCG8,Q9Y388,Q9Y324,Q14137,O95478,P78527,Q9H9Y2,O15213,P62241,…
4	GO:1901568	fatty acid derivative metabolic process	Biological Process	1	O95573
4	GO:1901615	organic hydroxy compound metabolic process	Biological Process	7	Q9NPH2,P43304,Q15648,Q9UBM7,P28288,P04637,Q96EB6
4	GO:0106106	cold-induced thermogenesis	Biological Process	1	Q6IAN0
4	GO:0030168	platelet activation	Biological Process	1	Q9NUP1
4	GO:0050865	regulation of cell activation	Biological Process	10	Q96IZ0,Q96QE3,P42345,P30825,O43747,Q86U86,Q9BXW9,P78527,O96028,Q08722
4	GO:0050866	negative regulation of cell activation	Biological Process	1	Q96IZ0
4	GO:0050867	positive regulation of cell activation	Biological Process	8	Q96QE3,P42345,P30825,O43747,Q86U86,P78527,O96028,Q08722
4	GO:0072537	fibroblast activation	Biological Process	1	Q02952
4	GO:0001909	leukocyte mediated cytotoxicity	Biological Process	2	P07437,O43747
4	GO:0031341	regulation of cell killing	Biological Process	1	O43747
4	GO:0031343	positive regulation of cell killing	Biological Process	1	O43747
4	GO:0006458	'de novo' protein folding	Biological Process	6	P11021,P11142,P17066,P38646,Q9NXW2,P78371
4	GO:0007023	post-chaperonin tubulin folding pathway	Biological Process	2	Q15813,Q9BTW9
4	GO:0034975	protein folding in endoplasmic reticulum	Biological Process	3	P11021,P27824,Q8IXB1
4	GO:0042026	protein refolding	Biological Process	4	P11021,P11142,P17066,P38646
4	GO:0061077	chaperone-mediated protein folding	Biological Process	12	P11021,P11142,P17066,P38646,Q9NXW2,P78371,P17987,P40227,P49368,P50990,P50991,Q99832
4	GO:1903332	regulation of protein folding	Biological Process	1	P11021
4	GO:0048199	vesicle targeting, to, from or within Golgi	Biological Process	3	Q8TD08,Q9HCU5,O00743
4	GO:0007018	microtubule-based movement	Biological Process	21	Q9NYC9,Q96PN6,P78537,Q8TDH9,Q92572,Q96EV8,Q9NUP1,Q9GZM8,Q9UL16,P42858,Q66K74,Q92845,Q9BQS8,Q9UBF2,O95817,P78559,P11142,A0A6Q8PFA6,Q14807,Q8NI77,Q96Q89
4	GO:0030048	actin filament-based movement	Biological Process	3	O00160,Q96PN6,Q13459
4	GO:0051270	regulation of cellular component movement	Biological Process	19	P15104,P19174,P27361,Q14155,Q92839,P04899,P11021,Q75N03,Q09028,Q8TD08,Q9BZE4,Q96EB6,P42345,Q9UL16,Q02952,Q96PN6,Q08722,Q92974,Q96Q89
4	GO:0051271	negative regulation of cellular component movement	Biological Process	5	Q92839,Q09028,Q8TD08,Q9BZE4,Q96PN6
4	GO:0051272	positive regulation of cellular component movement	Biological Process	12	P19174,P27361,Q14155,P04899,P11021,Q75N03,Q96EB6,P42345,Q02952,Q08722,Q92974,Q96Q89
4	GO:0097485	neuron projection guidance	Biological Process	4	Q8TER5,Q96F07,Q9BPU6,P83731
4	GO:0000226	microtubule cytoskeleton organization	Biological Process	31	P42858,Q9GZM8,Q66K74,Q8NI77,Q08379,Q92974,Q15813,Q9H3R5,Q16531,O94927,P06748,P38398,Q5VU43,Q7Z4H7,Q9BT25,O14980,Q96EB6,Q9H0A0,Q96BD8,P78559,Q9BTW9,Q8IYT4,Q9BXS6,P07437,P30153,Q8TD08,Q14155,P68366,Q3KQU3,Q9BQE3,Q9P0L2
4	GO:0031023	microtubule organizing center organization	Biological Process	11	O94927,P06748,P38398,Q08379,Q5VU43,Q7Z4H7,Q9BT25,Q9GZM8,O14980,Q96EB6,Q9H0A0
4	GO:0032886	regulation of microtubule-based process	Biological Process	18	Q92974,O14980,P06748,Q96EB6,Q9H0A0,O94927,Q7Z4H7,Q9BT25,Q96BD8,P78559,Q66K74,Q9BTW9,P38398,Q9UL16,Q8NI77,Q5VU43,Q8TD08,Q14155
4	GO:0051231	spindle elongation	Biological Process	1	P30153
4	GO:0060152	microtubule-based peroxisome localization	Biological Process	1	O43933
4	GO:0000278	mitotic cell cycle	Biological Process	67	Q86XI2,Q8NI77,Q9BXS6,O00743,P62753,Q13617,Q15910,Q2Q1W2,Q86VI3,Q07002,P42858,Q9GZM8,P04637,P29590,P61254,Q13362,Q9NYZ3,Q15813,Q66K74,Q9H3R5,Q56NI9,Q9NTI5,Q8WZ42,Q14807,Q9UJX2,Q96Q89,P38398,Q9NXR7,P62258,Q13042,Q96EB6,Q9UJX3,Q9UJX4,Q9UJX5,P83731,O60216,Q96K76,Q86U86,P78527,Q01831,Q96AY2,Q9BXW9,Q13564,O75367,Q9NVX2,P08243,P30153,Q9H6S0,Q08379,O43660,Q7L2J0,Q16531,Q96QE3,P49736,Q9BRX5,O75419,Q14691,…
4	GO:0045786	negative regulation of cell cycle	Biological Process	29	O75419,O94874,Q96RU2,Q99459,Q9UMS4,P04637,P29590,P61254,Q13362,Q9NYZ3,P38398,Q9NXR7,P06748,O60216,Q96K76,P78527,Q01831,Q96AY2,Q9BXW9,Q13564,O95373,Q9NVX2,Q9H6S0,Q96EB6,O75367,O60264,Q15910,O43159,P49848
4	GO:0045787	positive regulation of cell cycle	Biological Process	19	P06748,Q96Q89,O75367,Q9BXS6,Q13042,Q9UJX2,Q9UJX3,Q9UJX4,O60216,P08243,Q9H6S0,Q15648,O43660,Q7L2J0,Q96QE3,Q15910,Q8TD08,Q86XI2,P78362
4	GO:0051726	regulation of cell cycle	Biological Process	60	O75419,O94874,Q96RU2,Q99459,Q9UMS4,P32780,P50613,Q9BZE4,P04637,P29590,P61254,Q13362,Q9NYZ3,Q96Q89,Q9UJX2,P38398,Q9NXR7,P62258,Q13042,Q96EB6,Q9UJX3,Q9UJX4,Q9UJX5,O14980,P06748,Q9H0A0,O60216,Q96K76,Q86U86,P78527,Q01831,Q96AY2,Q9BXW9,Q13564,O75367,O95373,O43159,P49848,P78362,Q9BXS6,Q9NVX2,P08243,Q9H6S0,Q15648,P49711,O43660,Q7L2J0,Q16531,Q96QE3,Q15910,Q9BQG0,P30153,Q8TD08,O60264,Q86XI2,P61289,P67775,…
4	GO:0051304	chromosome separation	Biological Process	12	Q02880,Q96AY2,Q9UJX2,Q86U86,Q9UJX5,O60216,Q13042,Q9UJX3,Q9UJX4,P30153,Q8TD08,Q86XI2
4	GO:0051983	regulation of chromosome segregation	Biological Process	10	Q9UJX2,Q86U86,Q9UJX5,O60216,Q13042,Q9UJX3,Q9UJX4,Q86XI2,Q96EB6,Q8TD08
4	GO:0051984	positive regulation of chromosome segregation	Biological Process	1	Q86XI2
4	GO:0051985	negative regulation of chromosome segregation	Biological Process	2	O60216,Q96EB6
4	GO:0098813	nuclear chromosome segregation	Biological Process	26	Q86XI2,Q8NI77,Q9BXS6,Q02880,Q96AY2,O60216,Q14807,Q9H4I0,Q56NI9,Q9NTI5,Q8WZ42,Q9UJX2,Q9BXW9,P46379,Q86U86,Q9UJX5,O75367,Q13042,Q9UJX3,Q9UJX4,P30153,Q66K74,P49711,Q96EB6,Q8TD08,O60264
4	GO:0010646	regulation of cell communication	Biological Process	97	Q96EV8,Q96DX7,P49407,Q9Y5X3,Q9UNH7,Q9NZJ7,Q7Z569,Q02952,P35520,P30153,P67775,P04637,P11021,Q09028,Q96EB6,P42858,P10398,Q6IAA8,Q9Y6D5,Q9H2H9,P27361,Q14596,P19525,Q13610,O94874,P38398,Q9P253,Q15648,Q6SZW1,Q13459,Q92974,P57737,P62760,O14730,Q9BUZ4,O15111,Q13325,Q7Z2W4,Q9NR30,P42224,Q15910,Q9BT40,Q86VI3,Q9HAN9,P06748,O43324,P41743,Q6NW34,Q9UMX1,Q7Z3E5,P19338,Q92610,P04899,P78559,Q15042,P50416,P19174,…
4	GO:0010647	positive regulation of cell communication	Biological Process	45	Q96EV8,Q96DX7,Q02952,P42858,Q6IAA8,P19525,Q15648,P49407,P57737,P62760,O15111,Q13325,Q7Z2W4,Q9NR30,Q15910,Q86VI3,Q9HAN9,O43324,P41743,Q6NW34,Q7Z3E5,Q9BUZ4,P04899,Q96EB6,Q9Y5X3,Q92558,Q96F07,P42345,Q8N1F7,Q15042,P27361,P78368,Q38SD2,Q96K76,Q9NVX2,P29590,P61927,P61254,Q96PN6,P57088,P18847,P30153,O75569,P04637,P49848
4	GO:0010648	negative regulation of cell communication	Biological Process	40	P49407,Q9Y5X3,Q9UNH7,Q7Z569,P04637,P11021,Q09028,Q96EB6,P38398,Q9P253,Q6SZW1,O14730,P30153,P67775,P42224,Q9BT40,Q9UMX1,P19338,Q92610,P62760,Q15910,P04899,Q96IZ0,Q8NBU5,Q9UIV1,Q9Y6K5,P18847,Q96RT1,P42345,P52952,Q92974,Q96QE3,Q96K76,O94874,P27361,Q93009,Q08722,P42858,P61289,Q9Y3T9
4	GO:0019226	transmission of nerve impulse	Biological Process	1	P42345
4	GO:0031668	cellular response to extracellular stimulus	Biological Process	17	P11142,P15104,P42345,P49754,Q96EB6,Q6IAA8,P18847,P19525,P27361,O43159,P04637,P08243,P11021,Q9BQG0,Q9Y4P3,P35520,Q15648
4	GO:0007162	negative regulation of cell adhesion	Biological Process	5	Q9BTW9,Q9BZE4,Q96IZ0,Q15582,Q75N03
4	GO:0030155	regulation of cell adhesion	Biological Process	15	Q15582,Q75N03,Q9BTW9,Q9BZE4,Q08722,Q96QZ7,P42345,P30825,Q96IZ0,Q86U86,Q92845,Q14155,P29590,P30153,P67775
4	GO:0031589	cell-substrate adhesion	Biological Process	3	Q9UL63,Q9BTW9,Q14155
4	GO:0045785	positive regulation of cell adhesion	Biological Process	7	Q08722,Q96QZ7,P42345,P30825,Q86U86,Q92845,Q14155
4	GO:0098609	cell-cell adhesion	Biological Process	13	Q9H2X3,Q9BZE4,Q08722,Q96QZ7,P42345,P30825,Q96IZ0,Q86U86,Q92845,Q9NUP1,Q75N03,Q96F07,Q9Y2H6
4	GO:0030010	establishment of cell polarity	Biological Process	6	P42858,Q9GZM8,Q96L92,P41743,Q96Q89,P57737
4	GO:0032878	regulation of establishment or maintenance of cell polarity	Biological Process	1	Q96Q89
4	GO:0061245	establishment or maintenance of bipolar cell polarity	Biological Process	2	P41743,Q96RT1
4	GO:0061339	establishment or maintenance of monopolar cell polarity	Biological Process	1	P41743
4	GO:0002764	immune response-regulating signaling pathway	Biological Process	12	P46379,Q6SZW1,O15111,P19174,Q9Y6K5,O14730,Q13144,Q14232,Q96IZ0,Q96RT1,Q7Z2W4,Q08722
4	GO:0006984	ER-nucleus signaling pathway	Biological Process	3	P04637,P11021,P57088
4	GO:0007166	cell surface receptor signaling pathway	Biological Process	67	Q96DX7,P04899,P46379,P19174,Q96RT1,Q9Y5X3,Q9UNH7,O00507,O15198,P04637,P29590,Q96EB6,Q14831,P39086,Q96T58,Q9NVX2,Q08722,P42224,P27361,Q92572,Q9GZM8,Q2Q1W2,O95817,Q9H0S4,Q9UER7,Q9UKL3,P78368,Q16531,Q9P0L2,Q9UMX1,P30153,P67775,P11021,Q09028,Q13610,O15111,Q13459,Q9UIV1,P49407,P41743,Q6NW34,Q7Z3E5,P19338,Q92610,Q9BT40,Q14155,Q13144,Q14232,Q96IZ0,Q92558,Q96F07,B7ZLD0,Q15042,Q15648,Q9Y6K5,Q8N1F7,O94887,…
4	GO:0007186	G protein-coupled receptor signaling pathway	Biological Process	6	P04899,P49407,Q02952,Q14831,Q9NQS5,Q9BT40
4	GO:0007212	dopamine receptor signaling pathway	Biological Process	1	Q96EV8
4	GO:0009755	hormone-mediated signaling pathway	Biological Process	8	Q15648,Q8TDD1,Q9UER7,O94874,P38398,Q9P253,Q96EB6,P32780
4	GO:0009966	regulation of signal transduction	Biological Process	87	Q96DX7,P49407,Q9Y5X3,Q9UNH7,Q7Z569,Q02952,P35520,P30153,P67775,P04637,P11021,Q09028,Q96EB6,P42858,P10398,Q6IAA8,Q9Y6D5,P27361,Q14596,P19525,Q13610,O94874,P38398,Q9P253,Q15648,Q6SZW1,Q13459,Q92974,P57737,O14730,Q9BUZ4,O15111,Q13325,Q7Z2W4,Q9NR30,P42224,Q15910,Q9BT40,Q86VI3,Q9HAN9,P06748,O43324,P41743,Q6NW34,Q9UMX1,Q7Z3E5,P19338,Q92610,P04899,Q96IZ0,A7KAX9,Q86X10,Q8TER5,Q92558,Q96F07,Q12923,P42345,…
4	GO:0009967	positive regulation of signal transduction	Biological Process	42	Q96DX7,Q02952,P42858,Q6IAA8,P19525,Q15648,P49407,P57737,O15111,Q13325,Q7Z2W4,Q9NR30,Q15910,Q86VI3,Q9HAN9,O43324,P41743,Q6NW34,Q7Z3E5,Q9BUZ4,P04899,Q96EB6,Q9Y5X3,Q92558,Q96F07,P42345,Q8N1F7,P27361,P78368,Q38SD2,Q96K76,Q9NVX2,P29590,P61927,P61254,Q96PN6,P57088,P18847,P30153,O75569,P04637,P49848
4	GO:0009968	negative regulation of signal transduction	Biological Process	38	P49407,Q9Y5X3,Q9UNH7,P04637,P11021,Q09028,Q96EB6,P38398,Q9P253,Q6SZW1,O14730,P30153,P67775,P42224,Q9BT40,Q9UMX1,P19338,Q92610,Q15910,Q96IZ0,Q9UIV1,Q9Y6K5,P18847,Q96RT1,P42345,P52952,P04899,Q92974,Q96QE3,Q96K76,O94874,P27361,Q93009,Q08722,P42858,P61289,Q9Y3T9,Q7Z569
4	GO:0030522	intracellular receptor signaling pathway	Biological Process	13	Q15648,Q8TDD1,Q9UER7,O94874,P38398,Q9P253,Q96EB6,Q9Y6K5,O14730,P29590,Q15910,Q96RT1,Q7Z2W4
4	GO:0030968	endoplasmic reticulum unfolded protein response	Biological Process	7	Q8IXB1,P11021,O94874,P57088,P18847,P19525,Q9Y4P3
4	GO:0035556	intracellular signal transduction	Biological Process	96	O75419,O94874,Q96RU2,Q99459,Q9UMS4,P01111,P10398,P27361,P62258,Q7Z569,P04637,P29590,P61254,Q13362,Q9NYZ3,P38398,Q9NXR7,O15111,Q9UER7,A7KAX9,Q86VI3,Q13459,P78527,Q96K76,Q8WZ42,Q02952,P35520,O94887,Q92558,Q9NYB9,Q9Y2A7,P19174,P30153,P67775,P40123,Q01518,Q01831,Q96AY2,Q9BXW9,P42345,P62753,Q96EB6,Q6IAA8,Q9Y6D5,Q14596,P19525,Q13564,Q92974,P49407,P57737,Q9Y6K5,O14730,Q96QE3,P46379,Q9BUZ4,Q13325,Q7Z2W4,…
4	GO:0038034	signal transduction in absence of ligand	Biological Process	2	O95817,P30153
4	GO:0060395	SMAD protein signal transduction	Biological Process	3	Q8N1F7,O15198,P29590
4	GO:0097190	apoptotic signaling pathway	Biological Process	31	P04637,O95817,Q9H0S4,Q9UER7,Q9UKL3,P29590,P38398,P78527,Q96K76,P46379,Q13362,Q96EB6,Q96QE3,Q96RU2,Q8IXB1,O43159,Q9BQG0,Q13617,Q92974,P61254,Q96PN6,P18847,P04899,O43324,P42858,P61289,P30153,Q9Y3T9,O75569,P49848,Q96IZ0
4	GO:0098926	postsynaptic signal transduction	Biological Process	1	P04899
4	GO:0099004	calmodulin dependent kinase signaling pathway	Biological Process	1	P42858
4	GO:0008366	axon ensheathment	Biological Process	3	P42345,Q96P11,Q13144
4	GO:0009988	cell-cell recognition	Biological Process	7	P17987,P49368,P50990,P50991,P78371,Q99832,Q9H2X3
4	GO:0010941	regulation of cell death	Biological Process	62	Q9Y3T9,O95817,P04637,Q96PN6,P52952,Q92845,O60216,P41743,Q96EB6,P39687,P42224,Q13564,Q92688,Q9BUZ4,Q9UER7,O43324,P42858,P49848,P62753,P78527,Q13144,Q14155,Q8WYA6,Q96IZ0,Q9NZJ7,O94874,P06748,P08243,P10398,P11021,P19525,P27635,P35520,P38646,P42345,P46379,P61247,Q15648,Q16531,Q96K76,Q9NXR7,Q6SZW1,P49588,P49917,Q9HAN9,Q9UNH7,P61081,P78362,P29590,Q92974,Q99576,Q02952,P38398,Q96QE3,P61254,P18847,Q9BQG0,…
4	GO:0010942	positive regulation of cell death	Biological Process	24	P04637,Q96PN6,O43324,P42858,P49848,P62753,P78527,Q13144,Q14155,Q8WYA6,Q96EB6,Q96IZ0,Q9NZJ7,P61081,P78362,P29590,Q02952,P61254,P18847,Q9BQG0,P19174,P41743,P30153,O75569
4	GO:0012501	programmed cell death	Biological Process	79	P04637,Q9Y3T9,P52952,O60216,P27361,P29590,P30153,P42858,P46379,P49736,P49848,P61289,P67775,Q08722,Q16531,Q66K74,Q8N8D1,Q96F07,Q96IZ0,Q9BUZ4,Q9NXR7,Q9NZJ7,Q9Y2A7,P62753,O95817,Q9H0S4,Q9UER7,Q9UKL3,P38398,P78527,Q96K76,Q92845,Q96PN6,P41743,Q96EB6,Q13362,Q96QE3,Q96RU2,P39687,P42224,Q13564,Q92688,O43324,Q13144,Q14155,Q8WYA6,O94874,P06748,P08243,P10398,P11021,P19525,P27635,P35520,P38646,P42345,P61247,…
4	GO:0036473	cell death in response to oxidative stress	Biological Process	5	P29590,Q9UER7,Q96IZ0,Q96EB6,Q96PN6
4	GO:0060548	negative regulation of cell death	Biological Process	37	Q9Y3T9,O95817,P52952,Q92845,O60216,P41743,O94874,P04637,P06748,P08243,P10398,P11021,P19525,P27635,P35520,P38646,P42345,P46379,P61247,P62753,P78527,Q15648,Q16531,Q96EB6,Q96K76,Q9NXR7,P49588,P49917,Q9HAN9,Q9UNH7,Q92974,Q99576,P38398,Q96QE3,P04899,P42858,P61289
4	GO:0070265	necrotic cell death	Biological Process	3	Q92974,P04637,Q7Z3C6
4	GO:0070997	neuron death	Biological Process	14	Q9UER7,Q13564,Q6SZW1,O60216,P41743,P49588,P49917,Q96EB6,Q9HAN9,Q9UNH7,P04637,P61081,P78362,Q96PN6
4	GO:0001833	inner cell mass cell proliferation	Biological Process	4	Q14691,Q86XI2,Q9BRT9,Q9GZM8
4	GO:0008284	positive regulation of cell population proliferation	Biological Process	28	P01111,Q96EB6,P42224,Q96QE3,Q86VI3,P30825,P29590,P49917,P52952,O94874,P41743,P27361,P04899,P19174,Q15648,P06748,P18847,P46087,P46781,P62753,P78362,Q08722,Q15022,Q15910,Q5TA31,Q8TD08,Q96Q89,Q9UIV1
4	GO:0008285	negative regulation of cell population proliferation	Biological Process	21	P42224,P04637,Q92845,Q15648,Q96IZ0,P19525,P02794,O43324,O43422,O75569,P06748,P29590,P49711,P49848,Q09028,Q13362,Q86U86,Q9BZE4,Q9NTI5,Q9UIV1,Q9ULD5
4	GO:0010463	mesenchymal cell proliferation	Biological Process	1	P42224
4	GO:0014009	glial cell proliferation	Biological Process	3	O94874,P41743,P04637
4	GO:0033002	muscle cell proliferation	Biological Process	4	P78527,P42224,P52952,P04899
4	GO:0033687	osteoblast proliferation	Biological Process	1	P19525
4	GO:0042127	regulation of cell population proliferation	Biological Process	48	P42224,P01111,Q96EB6,P04637,Q92845,O94874,P04899,P06748,P18847,P46087,P46781,P52952,P62753,P78362,Q08722,Q15022,Q15910,Q5TA31,Q8TD08,Q96Q89,Q9UIV1,O43324,O43422,O75569,P02794,P19525,P29590,P49711,P49848,Q09028,Q13362,Q86U86,Q9BZE4,Q9NTI5,Q9ULD5,Q15648,Q96IZ0,Q96QE3,Q86VI3,P30825,P49917,P78527,P41743,P27361,P19174,Q2Q1W2,Q92974,Q9BVP2
4	GO:0048144	fibroblast proliferation	Biological Process	5	P29590,P49917,P02794,P04637,Q96IZ0
4	GO:0050673	epithelial cell proliferation	Biological Process	8	P42224,P01111,Q96EB6,Q15648,Q86VI3,P78527,P52952,P19174
4	GO:0061351	neural precursor cell proliferation	Biological Process	6	P04637,Q92845,Q9NZI8,Q92974,Q2Q1W2,P04899
4	GO:0070661	leukocyte proliferation	Biological Process	6	P04637,P62753,Q96IZ0,Q96QE3,P30825,P27361
4	GO:0072089	stem cell proliferation	Biological Process	6	O95376,Q15020,P19525,P04637,P49917,Q2Q1W2
4	GO:0072111	cell proliferation involved in kidney development	Biological Process	1	P42224
4	GO:0001558	regulation of cell growth	Biological Process	11	P42345,Q06265,Q96K76,P04637,P29590,P30153,P38398,P67775,Q96PN6,P06748,Q6IAA8
4	GO:0030307	positive regulation of cell growth	Biological Process	4	Q96PN6,P42345,Q06265,Q96K76
4	GO:0030308	negative regulation of cell growth	Biological Process	5	P04637,P29590,P30153,P38398,P67775
4	GO:0048588	developmental cell growth	Biological Process	5	Q96PN6,Q92558,Q96F07,Q9GZM8,O95376
4	GO:0006884	cell volume homeostasis	Biological Process	1	P06748
4	GO:0046716	muscle cell cellular homeostasis	Biological Process	1	O95817
4	GO:0055082	cellular chemical homeostasis	Biological Process	14	Q96EB6,P02792,P02794,Q9UI12,P29590,Q6P4Q7,P27361,P42858,Q9H2V7,P62760,P19174,P62258,Q8WWC4,Q96RR1
4	GO:0070050	neuron cellular homeostasis	Biological Process	2	Q9UI12,P78559
4	GO:0000910	cytokinesis	Biological Process	4	Q9BXS6,Q96Q89,Q16181,Q86VI3
4	GO:0007051	spindle organization	Biological Process	12	Q15813,Q66K74,Q9H3R5,Q16531,Q5VU43,O94927,P07437,Q08379,Q7Z4H7,Q9BT25,P30153,Q8TD08
4	GO:0007062	sister chromatid cohesion	Biological Process	8	Q56NI9,Q9NTI5,O60216,O75367,P30153,P49711,Q14807,Q9H4I0
4	GO:0007098	centrosome cycle	Biological Process	11	Q9GZM8,O14980,P06748,Q96EB6,Q9H0A0,P38398,O94927,Q08379,Q5VU43,Q7Z4H7,Q9BT25
4	GO:0007099	centriole replication	Biological Process	2	P06748,P38398
4	GO:0008608	attachment of spindle microtubules to kinetochore	Biological Process	1	Q96EB6
4	GO:0010564	regulation of cell cycle process	Biological Process	48	O75419,O94874,Q96RU2,Q99459,Q9UMS4,P04637,P29590,P61254,Q13362,Q9NYZ3,Q96Q89,Q9UJX2,P38398,Q9NXR7,O14980,P06748,Q96EB6,Q9H0A0,O60216,Q96K76,Q86U86,Q9UJX5,P78527,Q01831,Q96AY2,Q9BXW9,Q13564,O75367,Q9BXS6,Q13042,Q9UJX3,Q9UJX4,Q15648,P49711,O43660,Q7L2J0,Q16531,Q96QE3,Q15910,O43159,Q9BQG0,P30153,Q8TD08,O60264,Q86XI2,P50613,P61289,P67775
4	GO:0010948	negative regulation of cell cycle process	Biological Process	24	O75419,O94874,Q96RU2,Q99459,Q9UMS4,P04637,P29590,P61254,Q13362,Q9NYZ3,P38398,Q9NXR7,P06748,O60216,Q96K76,P78527,Q01831,Q96AY2,Q9BXW9,Q13564,Q96EB6,O75367,O60264,Q15910
4	GO:0032506	cytokinetic process	Biological Process	2	Q96Q89,Q86VI3
4	GO:0034085	establishment of sister chromatid cohesion	Biological Process	1	O60216
4	GO:0034086	maintenance of sister chromatid cohesion	Biological Process	1	O75367
4	GO:0044770	cell cycle phase transition	Biological Process	43	O75419,O94874,Q96RU2,Q99459,Q9UMS4,O00743,P62753,Q13617,Q15910,Q2Q1W2,Q86VI3,Q07002,P04637,P29590,P61254,Q13362,Q9NYZ3,Q9UJX2,P38398,Q9NXR7,P83731,O60216,Q96K76,Q86U86,Q9UJX5,P78527,Q01831,Q96AY2,Q9BXW9,Q13564,Q13042,Q9UJX3,Q9UJX4,O43660,Q7L2J0,Q16531,Q96QE3,O75367,P06748,Q8TD08,P50613,P61289,P67775
4	GO:0044786	cell cycle DNA replication	Biological Process	5	Q96QE3,P49736,Q9BRX5,O75419,Q14691
4	GO:0044837	actomyosin contractile ring organization	Biological Process	1	Q86VI3
4	GO:0045023	G0 to G1 transition	Biological Process	2	Q86U86,Q15648
4	GO:0051298	centrosome duplication	Biological Process	5	O14980,P06748,Q96EB6,Q9H0A0,P38398
4	GO:0051299	centrosome separation	Biological Process	1	Q9GZM8
4	GO:0051310	metaphase plate congression	Biological Process	5	Q14807,Q8NI77,Q9UJX2,Q96EB6,Q66K74
4	GO:0051653	spindle localization	Biological Process	3	P42858,Q9GZM8,Q9BXS6
4	GO:0060184	cell cycle switching	Biological Process	1	Q9H6S0
4	GO:0070314	G1 to G0 transition	Biological Process	4	O43159,Q9BQG0,P04637,Q15910
4	GO:0071163	DNA replication preinitiation complex assembly	Biological Process	1	O75419
4	GO:0090068	positive regulation of cell cycle process	Biological Process	16	P06748,Q96Q89,O75367,Q9BXS6,Q13042,Q9UJX2,Q9UJX3,Q9UJX4,O60216,Q15648,O43660,Q7L2J0,Q96QE3,Q15910,Q8TD08,Q86XI2
4	GO:1902292	cell cycle DNA replication initiation	Biological Process	2	P49736,Q9BRX5
4	GO:1902296	DNA strand elongation involved in cell cycle DNA replication	Biological Process	1	Q14691
4	GO:1903047	mitotic cell cycle process	Biological Process	57	Q86XI2,Q8NI77,Q9BXS6,O00743,P62753,Q13617,Q15910,Q2Q1W2,Q86VI3,Q07002,P42858,Q9GZM8,P04637,P29590,P61254,Q13362,Q9NYZ3,Q15813,Q66K74,Q9H3R5,Q56NI9,Q9NTI5,Q8WZ42,Q14807,Q9UJX2,Q96Q89,P38398,Q9NXR7,P83731,O60216,Q96K76,Q86U86,Q9UJX5,P78527,Q01831,Q96AY2,Q9BXW9,Q13564,O75367,Q13042,Q9UJX3,Q9UJX4,P30153,Q08379,O43660,Q7L2J0,Q16531,Q96QE3,Q96EB6,P49736,Q9BRX5,O75419,Q14691,O60264,P50613,P61289,P67775
4	GO:2000689	actomyosin contractile ring assembly actin filament organization	Biological Process	1	Q86VI3
4	GO:0140056	organelle localization by membrane tethering	Biological Process	2	O15498,Q9P253
4	GO:0001556	oocyte maturation	Biological Process	2	P30153,Q5TAX3
4	GO:0007056	spindle assembly involved in female meiosis	Biological Process	1	Q16531
4	GO:0007140	male meiotic nuclear division	Biological Process	1	Q8NI77
4	GO:0007143	female meiotic nuclear division	Biological Process	3	Q16531,P30153,Q9Y4F3
4	GO:0007281	germ cell development	Biological Process	11	Q5TAX3,Q96PN6,Q96SI9,Q9H6S0,Q9UMX1,Q9Y2H6,P62753,Q96SB4,Q9Y4F3,P30153,P42345
4	GO:0007289	spermatid nucleus differentiation	Biological Process	1	Q96SB4
4	GO:0009994	oocyte differentiation	Biological Process	3	Q5TAX3,Q9H6S0,P30153
4	GO:0035092	sperm DNA condensation	Biological Process	1	Q96SB4
4	GO:0048515	spermatid differentiation	Biological Process	6	Q96PN6,Q96SI9,Q9H6S0,Q9UMX1,Q9Y2H6,Q96SB4
4	GO:1903537	meiotic cell cycle process involved in oocyte maturation	Biological Process	1	P30153
4	GO:0030036	actin cytoskeleton organization	Biological Process	27	O00160,P40123,P41743,Q01518,Q92974,Q9NYB9,P57737,Q92558,Q8WZ42,Q96F07,P42345,Q9Y2A7,A0A0A0MRA8,P11171,Q9Y613,Q9NQA3,Q2M389,P49407,Q96IZ0,Q08722,Q9BT40,P52952,Q86VI3,O94887,Q13643,Q96EV8,Q9UL63
4	GO:0032970	regulation of actin filament-based process	Biological Process	11	Q96F07,P42345,Q9Y2A7,Q2M389,Q9NQA3,Q9Y613,Q08722,Q9BT40,Q96PN6,Q92558,Q9NYB9
4	GO:0010528	regulation of transposition	Biological Process	2	Q9HCE1,Q9NRW3
4	GO:0010529	negative regulation of transposition	Biological Process	2	Q9HCE1,Q9NRW3
4	GO:0032197	transposition, RNA-mediated	Biological Process	2	Q9HCE1,Q9NRW3
4	GO:0043482	cellular pigment accumulation	Biological Process	2	O43747,Q8TDH9
4	GO:0048753	pigment granule organization	Biological Process	6	O43747,P78537,Q8TDH9,Q96EV8,Q9NUP1,Q92572
4	GO:0051875	pigment granule localization	Biological Process	1	Q8TDH9
4	GO:0045104	intermediate filament cytoskeleton organization	Biological Process	4	Q7Z3Y8,Q9GZM8,A0A590UJG2,Q96RT1
4	GO:0010524	positive regulation of calcium ion transport into cytosol	Biological Process	2	P42858,P19174
4	GO:0032388	positive regulation of intracellular transport	Biological Process	6	O95817,P62258,Q92688,Q96Q89,O95376,Q96PN6
4	GO:0034764	positive regulation of transmembrane transport	Biological Process	4	P42858,P41743,P19174,Q9H2H9
4	GO:0044089	positive regulation of cellular component biogenesis	Biological Process	15	P42345,Q9NYB9,Q9Y2A7,Q504Q3,Q9NVN8,P42858,P04637,Q08722,Q9Y613,Q5VU43,Q9GZM8,P67775,Q16181,Q8TD08,Q15042
4	GO:0045597	positive regulation of cell differentiation	Biological Process	19	P42345,Q15910,Q86U86,O75367,Q15648,P78527,P42224,P52952,Q92974,Q96PN6,P49917,Q96T58,Q8TDH9,Q96EB6,O94874,P41743,Q14155,O95373,Q13610
4	GO:0051130	positive regulation of cellular component organization	Biological Process	44	P49407,Q8NBU5,Q96EV8,P42345,Q9NYB9,Q9Y2A7,Q504Q3,P41743,Q9NVN8,P29590,Q9BVP2,P17987,P27361,P40227,P49368,P50990,P50991,P78371,Q8TD08,Q99832,O75367,P42858,Q96PN6,Q75N03,Q9BXS6,Q13042,Q9UJX2,Q9UJX3,Q9UJX4,O60216,P04637,Q08722,Q9Y613,Q5VU43,Q15910,Q9GZM8,P67775,Q9BQS8,Q16181,Q15042,Q86XI2,Q14155,Q92558,P49917
4	GO:0051781	positive regulation of cell division	Biological Process	2	Q96Q89,P67809
4	GO:0150032	positive regulation of protein localization to lysosome	Biological Process	1	Q6IAA8
4	GO:1900078	positive regulation of cellular response to insulin stimulus	Biological Process	3	P04899,Q96EB6,Q9Y5X3
4	GO:1900182	positive regulation of protein localization to nucleus	Biological Process	12	O95817,P06748,P17987,P40227,P49368,P50990,P50991,P78371,Q4G0J3,Q7L2J0,Q99832,O95373
4	GO:1903532	positive regulation of secretion by cell	Biological Process	5	Q96EV8,P62760,O43747,Q8WZ42,Q15042
4	GO:1903749	positive regulation of establishment of protein localization to mitochondrion	Biological Process	2	O95376,Q96PN6
4	GO:1904377	positive regulation of protein localization to cell periphery	Biological Process	3	O95573,P41743,P11171
4	GO:1904816	positive regulation of protein localization to chromosome, telomeric region	Biological Process	10	P17987,P40227,P49368,P50990,P50991,P78371,Q99832,P29590,Q9BVP2,Q9NVN8
4	GO:1905477	positive regulation of protein localization to membrane	Biological Process	2	O95573,P41743
4	GO:1905898	positive regulation of response to endoplasmic reticulum stress	Biological Process	3	Q96EB6,P57088,P46379
4	GO:2000010	positive regulation of protein localization to cell surface	Biological Process	1	P78559
4	GO:2001022	positive regulation of response to DNA damage stimulus	Biological Process	8	O43324,P38398,Q96EB6,Q9NXR7,P61254,Q86U86,P78527,Q02880
4	GO:2001040	positive regulation of cellular response to drug	Biological Process	1	Q9UMX1
4	GO:0032387	negative regulation of intracellular transport	Biological Process	2	Q9UMX1,Q9BT40
4	GO:0034763	negative regulation of transmembrane transport	Biological Process	2	Q9BT40,P62258
4	GO:0045596	negative regulation of cell differentiation	Biological Process	17	P42224,P04637,Q92845,P67775,Q9P0L2,P52952,Q96EB6,Q15910,P38646,Q15648,Q6NW34,O95373,Q14596,Q9UMX1,Q9BPU6,Q15022,Q92688
4	GO:0051129	negative regulation of cellular component organization	Biological Process	23	Q92974,P06748,Q9BTW9,O14730,P11021,P29590,Q01780,Q8NDF8,Q9H0A0,Q9NVN8,Q9UKS6,O60216,P38398,Q9BPU6,Q9BT40,Q96EV8,P11142,P40429,P04637,Q12923,O60264,P42345,Q14155
4	GO:0051283	negative regulation of sequestering of calcium ion	Biological Process	2	P42858,P19174
4	GO:1900077	negative regulation of cellular response to insulin stimulus	Biological Process	3	P19338,Q92610,Q9BT40
4	GO:1900181	negative regulation of protein localization to nucleus	Biological Process	2	Q9UMX1,P42345
4	GO:1902817	negative regulation of protein localization to microtubule	Biological Process	1	P78559
4	GO:1903531	negative regulation of secretion by cell	Biological Process	3	Q14831,P04899,P62760
4	GO:1903573	negative regulation of response to endoplasmic reticulum stress	Biological Process	2	O94874,P11021
4	GO:1904815	negative regulation of protein localization to chromosome, telomeric region	Biological Process	1	O75367
4	GO:1905090	negative regulation of parkin-mediated stimulation of mitophagy in response to mitochondrial depolarization	Biological Process	1	Q709C8
4	GO:1905476	negative regulation of protein localization to membrane	Biological Process	1	Q9BT40
4	GO:2000655	negative regulation of cellular response to testosterone stimulus	Biological Process	1	Q96EB6
4	GO:2001021	negative regulation of response to DNA damage stimulus	Biological Process	3	Q96EB6,Q96QE3,Q96K76
4	GO:0001708	cell fate specification	Biological Process	2	Q9UMX1,Q09028
4	GO:0010623	programmed cell death involved in cell development	Biological Process	2	P78527,Q16531
4	GO:0030154	cell differentiation	Biological Process	112	Q5TAX3,P52952,O94874,Q9BQG0,Q9BZE4,Q9NR30,Q9P2E9,P62258,Q02880,Q8NAT1,Q9P0L2,Q9NVX2,Q15582,P04637,Q56NI9,P42345,P78527,P49917,P42224,Q96PN6,Q96SI9,Q9H6S0,Q9UMX1,Q9Y2H6,Q92845,P78559,Q66K74,Q8TER5,Q96F07,Q9BPU6,Q15910,P67775,Q9GZM8,P41743,Q13144,Q14232,Q96P11,Q13428,Q9H9Y6,O94887,P62753,P29590,O60941,O95573,P28370,Q9Y4B6,Q15648,P38646,Q15758,Q86XI2,Q6IAN0,Q96EB6,Q8WZ42,P50416,Q16762,Q7Z3Y8,Q99707,…
4	GO:0032989	cellular component morphogenesis	Biological Process	24	P78559,Q02880,Q66K74,Q8TER5,Q96F07,Q9BPU6,Q9GZM8,Q8WZ42,P83731,Q96PN6,Q96EV8,Q96Q89,Q9Y2A7,Q6SZW1,Q15813,P52952,Q9NYB9,Q92558,O60749,Q13459,Q13596,Q9NZI8,Q9HCE1,Q14155
4	GO:0045165	cell fate commitment	Biological Process	8	P42345,P04637,P78527,Q9UMX1,Q09028,Q92974,P52952,P29590
4	GO:0048468	cell development	Biological Process	57	Q5TAX3,P42345,Q96PN6,Q96SI9,Q9H6S0,Q9UMX1,Q9Y2H6,P04637,Q92845,P78559,Q02880,Q66K74,Q8TER5,Q96F07,Q9BPU6,Q9GZM8,Q9P0L2,P41743,Q13144,Q14232,Q96P11,Q15910,Q13428,O94887,P62753,Q8WZ42,Q99707,P78537,Q8TDH9,Q96EV8,Q9NUP1,P83731,Q96SB4,P78527,Q16531,Q15648,Q38SD2,Q9NZJ7,Q9Y4F3,O95376,Q9BTW9,Q96Q89,Q9Y2A7,Q6SZW1,Q15813,P49917,Q96T58,P52952,O94874,Q9NYB9,P27361,Q14831,Q92558,Q9NZI8,Q9HCE1,Q14155,P30153
4	GO:0048469	cell maturation	Biological Process	4	Q5TAX3,O94887,Q9NZJ7,P30153
4	GO:0003254	regulation of membrane depolarization	Biological Process	1	Q96PN6
4	GO:0010453	regulation of cell fate commitment	Biological Process	1	Q09028
4	GO:0031641	regulation of myelination	Biological Process	2	P42345,Q96P11
4	GO:0034762	regulation of transmembrane transport	Biological Process	6	Q9BT40,P42858,P41743,P19174,P62258,Q9H2H9
4	GO:0044087	regulation of cellular component biogenesis	Biological Process	35	Q8TD08,Q9HCU5,P42345,Q9NYB9,Q9Y2A7,Q504Q3,O94927,Q7Z4H7,Q9BT25,Q96F07,Q9BTW9,O14730,P11021,Q9NVN8,Q9NRL2,O94887,P49754,Q9P253,P11142,P42858,P04637,P06748,P38398,Q9Y613,Q08722,Q9BT40,Q5VU43,Q9GZM8,P19525,P67775,P40429,Q16181,Q12923,Q14155,Q15042
4	GO:0045595	regulation of cell differentiation	Biological Process	35	P42224,P04637,Q92845,P42345,Q15910,P67775,Q9P0L2,P52952,Q86U86,Q9BXW9,Q15022,Q92688,Q96EB6,O75367,Q15648,P78527,Q96QR8,P38646,Q6NW34,Q92974,O95373,Q14596,Q9UMX1,Q96PN6,P49917,Q96T58,Q9BPU6,Q8TDH9,O94874,P41743,Q14155,P19525,Q09028,Q13610,P30153
4	GO:0051128	regulation of cellular component organization	Biological Process	94	P06748,P42345,Q6IAA8,Q9UL63,P49407,Q8NBU5,Q96EV8,Q8TD08,Q9HCU5,Q92974,Q96Q89,Q9UJX2,Q9NYB9,Q9Y2A7,Q504Q3,O14980,Q96EB6,Q9H0A0,O94927,Q7Z4H7,Q9BT25,Q9GZM8,Q9P0L2,P41743,Q86U86,Q9UJX5,Q9UKS6,Q06265,Q96K76,P04637,P29590,P30153,P38398,P67775,Q96F07,Q96BD8,P78559,Q66K74,Q9BTW9,O14730,P11021,Q9NVN8,Q9NRL2,Q9BVP2,Q01780,Q8NDF8,P17987,P27361,P40227,P49368,P50990,P50991,P78371,Q99832,O94887,O75367,Q2M389,…
4	GO:0051282	regulation of sequestering of calcium ion	Biological Process	2	P42858,P19174
4	GO:0051302	regulation of cell division	Biological Process	2	Q96Q89,P67809
4	GO:0060341	regulation of cellular localization	Biological Process	40	Q8TD08,Q9HCU5,P29590,P42858,Q9GZM8,P62760,O95817,Q9UMX1,O95573,O14980,P62258,Q92688,P19174,Q9BT40,Q96Q89,Q6IAA8,P42345,O95373,Q96EB6,P78559,P41743,O95376,Q96PN6,P15104,P06748,P11171,O75367,Q9BVP2,Q9NVN8,P17987,P40227,P49368,P50990,P50991,P78371,Q99832,Q4G0J3,Q7L2J0,Q93009,P27361
4	GO:0060627	regulation of vesicle-mediated transport	Biological Process	18	Q9UL63,P49407,Q8NBU5,Q96EV8,Q8TD08,Q9HCU5,Q9UKS6,O95573,O43747,Q75N03,P62760,P04899,Q08722,Q15042,Q93009,Q4J6C6,Q9P253,P27361
4	GO:0080135	regulation of cellular response to stress	Biological Process	29	P38398,P49848,Q9NXR7,P27361,Q14596,P19525,P04637,P06748,O43324,Q96EB6,Q9BUZ4,P42345,Q96IZ0,P61254,Q96QE3,Q92974,Q96K76,Q96PN6,P11021,O94874,P57088,P46379,Q709C8,P29590,P35659,Q86U86,O96028,P78527,Q02880
4	GO:0090287	regulation of cellular response to growth factor stimulus	Biological Process	7	P04637,P11021,Q09028,Q96EB6,Q9UNH7,Q92558,Q96F07
4	GO:1900076	regulation of cellular response to insulin stimulus	Biological Process	6	P19338,Q92610,Q9BT40,P04899,Q96EB6,Q9Y5X3
4	GO:1900117	regulation of execution phase of apoptosis	Biological Process	1	P04637
4	GO:1903530	regulation of secretion by cell	Biological Process	10	Q96EV8,Q14831,P62760,O43747,P04899,Q8WZ42,P50416,Q15042,Q4J6C6,Q9P253
4	GO:2000654	regulation of cellular response to testosterone stimulus	Biological Process	1	Q96EB6
4	GO:2001038	regulation of cellular response to drug	Biological Process	1	Q9UMX1
4	GO:0008356	asymmetric cell division	Biological Process	2	Q92974,Q08379
4	GO:0017145	stem cell division	Biological Process	1	Q9BVP2
4	GO:0040016	embryonic cleavage	Biological Process	1	P11387
4	GO:0055057	neuroblast division	Biological Process	1	Q92974
4	GO:0046907	intracellular transport	Biological Process	90	O14980,P06748,Q8TD08,Q9HCU5,Q6I9Y2,Q9BW27,O43592,P05455,P29590,P62258,Q96RT1,Q9UID3,O15397,O60518,O95373,P04637,P52292,Q15648,Q8N1F7,Q96P70,Q9UI26,Q9Y5L0,P38646,Q9UIA9,O60725,P41743,P09132,P37108,P49458,P46379,P49754,Q709C8,O43933,Q99797,Q9UJS0,P50416,O43747,O60749,Q13596,Q92572,Q92974,Q96L92,Q9P253,Q9UBF2,Q9UNH7,Q9Y5X3,O15498,Q08379,P57737,Q7Z3U7,P39687,Q8NFH4,Q9Y613,P78537,Q8TDH9,Q96EV8,Q9NUP1,…
4	GO:0051640	organelle localization	Biological Process	31	O14980,P06748,P42858,Q9GZM8,Q8TD08,Q9HCU5,O15498,Q9P253,Q14807,Q8NI77,Q9UJX2,Q9Y613,O43747,Q92572,O00160,Q8TDH9,P78537,Q6IAA8,Q9BXS6,Q66K74,O00743,O75153,Q96EV8,Q9NUP1,P42345,Q9P0L2,Q96EB6,O43933,Q92845,Q9BQS8,Q9UBF2
4	GO:0051649	establishment of localization in cell	Biological Process	103	O14980,P06748,P42858,Q9GZM8,Q96EV8,Q8TD08,Q9HCU5,Q6I9Y2,Q9BW27,O43592,P05455,P29590,P62258,Q96RT1,Q9UID3,O15397,O60518,O95373,P04637,P52292,Q15648,Q8N1F7,Q96P70,Q9UI26,Q9Y5L0,P38646,Q9UIA9,O60725,P41743,P09132,P37108,P49458,P46379,P49754,Q709C8,O43933,Q99797,Q9UJS0,P50416,O43747,O60749,Q13596,Q92572,Q92974,Q96L92,Q9P253,Q9UBF2,Q9UNH7,Q9Y5X3,O15498,Q08379,P57737,Q7Z3U7,P39687,Q8NFH4,Q14807,Q8NI77,…
4	GO:0051668	localization within membrane	Biological Process	20	O60725,P41743,P09132,P37108,P49458,P46379,Q9Y6D5,P11021,Q96L92,Q9NQA3,Q9UID3,Q8WWC4,Q9Y575,O95573,Q4J6C6,Q9NZJ7,Q6IAA8,Q9BT40,Q15042,Q8NBU5
4	GO:0070727	cellular macromolecule localization	Biological Process	89	P29590,P62258,Q96RT1,Q9UID3,O15397,O60518,O95373,P04637,P52292,Q15648,Q8N1F7,Q96P70,Q9BW27,Q9UI26,Q9Y5L0,O14980,P38646,Q9UIA9,O60725,P41743,P09132,P37108,P49458,P46379,P49754,Q709C8,O43933,Q99797,O43592,O43747,O60749,P06748,Q13596,Q92572,Q92974,Q96L92,Q9P253,Q9UBF2,Q9UNH7,Q9Y5X3,Q96CS3,P11021,Q9HCU5,Q8WWC4,Q9GZM8,P50851,Q7Z3C6,O43660,Q96Q89,Q9Y575,O95817,Q9UMX1,O95573,Q4J6C6,Q9NZJ7,Q92688,P11142,…
4	GO:0032507	maintenance of protein location in cell	Biological Process	3	P11021,Q709C8,P29590
4	GO:0051208	sequestering of calcium ion	Biological Process	2	P42858,P19174
4	GO:0051657	maintenance of organelle location	Biological Process	1	Q96EB6
4	GO:0097577	sequestering of iron ion	Biological Process	2	P02792,P02794
4	GO:0033554	cellular response to stress	Biological Process	89	P49917,Q96EB6,O94874,Q96RU2,Q99459,Q9UMS4,Q01831,P38398,O75419,P49736,Q9BRT9,Q15054,O60264,O75367,O75717,P06748,P20585,P32780,P35250,P35251,P50613,Q13112,Q14807,Q149N8,Q16531,Q96K58,P49848,Q9NXR7,Q93009,Q96K76,P04637,O60216,O96028,P78527,Q56NI9,Q96AY2,Q9Y4F3,P42345,Q13564,Q8TD08,P29590,P61254,Q13362,Q9NYZ3,P11021,Q9UER7,P11142,P15104,P49754,Q9NZI8,P27824,P46379,Q8IXB1,Q96CS3,Q9H8Y5,P18847,P19525,…
4	GO:0061646	positive regulation of glutamate neurotransmitter secretion in response to membrane depolarization	Biological Process	2	Q15042,Q96EV8
4	GO:0070887	cellular response to chemical stimulus	Biological Process	79	Q96DX7,Q15648,Q9BQB6,O00507,O15198,P04637,P29590,Q96EB6,P04899,P27361,Q92572,Q9GZM8,Q2Q1W2,P32780,P11021,Q09028,Q9UNH7,Q8TDD1,Q9UER7,P18847,P19525,Q9Y4P3,P42345,P41743,P42224,P78527,Q9BT40,O94874,P38398,Q9P253,O15111,O75569,Q8TCT9,Q9BXW9,O95817,P62760,Q15910,Q92839,Q8IXB1,P19338,Q92610,Q9Y5X3,P40429,Q9BW27,Q92558,Q96F07,Q96EV8,Q9UIV1,Q9Y6K5,P06748,Q02880,Q9H8Y5,Q9NXW2,Q92974,Q6IAA8,Q96PN6,P49917,…
4	GO:0071216	cellular response to biotic stimulus	Biological Process	4	P04637,P11021,P27361,Q96AY2
4	GO:0104004	cellular response to environmental stimulus	Biological Process	18	P04637,P06748,P61254,Q16531,Q96K76,Q96RU2,Q9Y3T9,Q01831,Q96EB6,O95817,P27361,Q9UKL3,P42345,Q92974,P38398,P49917,Q9NXR7,Q15054
4	GO:0034219	carbohydrate transmembrane transport	Biological Process	2	Q9BT40,P41743
4	GO:0034220	ion transmembrane transport	Biological Process	11	Q9UJS0,P42858,Q8WWC4,P19174,Q9UI12,P30825,Q15758,Q9BWM7,P62258,Q9H2H9,Q96PN6
4	GO:0045117	azole transmembrane transport	Biological Process	1	P30825
4	GO:0071806	protein transmembrane transport	Biological Process	2	O43933,P11021
4	GO:0072530	purine-containing compound transmembrane transport	Biological Process	1	Q96PN6
4	GO:0098739	import across plasma membrane	Biological Process	3	P30825,Q15758,Q9H2H9
4	GO:0140115	export across plasma membrane	Biological Process	1	P62258
4	GO:1901679	nucleotide transmembrane transport	Biological Process	1	Q96PN6
4	GO:1903825	organic acid transmembrane transport	Biological Process	7	Q9H2H9,P50416,Q9UJS0,P28288,P30825,Q15758,Q9BWM7
4	GO:1990542	mitochondrial transmembrane transport	Biological Process	7	P50416,Q16762,Q9H0U6,Q8WWC4,Q9UJS0,Q9BWM7,Q96PN6
4	GO:0051642	centrosome localization	Biological Process	2	Q9Y613,Q9GZM8
4	GO:0006914	autophagy	Biological Process	25	O95817,Q7Z3C6,P04637,P50851,Q8TD08,P42345,Q08379,O94874,P49754,Q14596,Q96EB6,Q9UI12,Q9UNH7,Q9Y5X3,Q562E7,P11142,P27361,Q9BQS8,Q96PN6,P42858,Q709C8,Q15042,Q66K74,Q9P253,Q9UID3
4	GO:0016043	cellular component organization	Biological Process	247	P05388,P27635,P46087,P46777,P62750,P83731,Q02878,Q14137,Q9NVX2,Q9Y3A4,O95817,Q7Z3C6,Q86XI2,Q8NI77,Q9BXS6,P42858,Q9GZM8,O43159,O60264,Q96EB6,Q9UIF9,P07437,P68366,P78559,Q15813,Q3KQU3,Q66K74,Q7Z4H7,Q9BQE3,Q9BTW9,Q9P0L2,Q15020,Q9UMS4,P78362,Q96SB4,O75475,Q12872,P04637,P50851,Q02880,Q96AY2,P78527,Q53T94,P06748,P42345,Q6IAA8,Q9UL63,P49407,Q8NBU5,Q96EV8,Q8TD08,Q9HCU5,Q96RR1,P11387,O75419,P49736,Q14691,…
4	GO:0044085	cellular component biogenesis	Biological Process	188	P05388,P27635,P46087,P46777,P62750,P83731,Q02878,Q14137,Q9NVX2,Q9Y3A4,O95817,Q7Z3C6,O14980,P06748,Q6IN84,Q9H0A0,O43159,O60264,Q96EB6,Q9UIF9,Q15020,Q9UMS4,P78362,Q96SB4,O75475,Q12872,Q9Y324,O95478,P78527,Q01780,Q9H9Y2,O15213,P62241,Q8IY37,Q969X6,Q9H583,Q9NQZ2,O00541,P18124,P42766,Q6DKI1,Q9BYG3,Q9BZE4,Q9NVP1,Q06265,P62424,P62906,Q9BRU9,Q53T94,Q8TD08,Q9HCU5,O75367,P07305,P16403,P49736,Q09028,Q13112,…
4	GO:0006921	cellular component disassembly involved in execution phase of apoptosis	Biological Process	1	Q9HAN9
4	GO:1900119	positive regulation of execution phase of apoptosis	Biological Process	1	P04637
4	GO:0006904	vesicle docking involved in exocytosis	Biological Process	2	O15498,Q9P253
4	GO:0032940	secretion by cell	Biological Process	17	Q96EV8,Q9NQA3,Q9Y6D5,O15498,Q9P253,P27824,Q9HCU5,Q9UBF2,Q15758,Q14831,P62760,O43747,P04899,Q8WZ42,P50416,Q15042,Q4J6C6
4	GO:0075713	establishment of integrated proviral latency	Biological Process	1	P49917
4	GO:0019062	virion attachment to host cell	Biological Process	1	Q9H2X3
4	GO:0046718	viral entry into host cell	Biological Process	2	Q9H2X3,Q9P253
4	GO:0075733	intracellular transport of virus	Biological Process	2	P52292,Q9H2X3
4	GO:1903900	regulation of viral life cycle	Biological Process	12	P78362,Q16531,Q96SB4,Q9UIV1,P19525,Q13325,Q7Z2W4,Q9NRW3,Q9Y6K5,Q9BT40,Q02880,P52292
4	GO:1903902	positive regulation of viral life cycle	Biological Process	1	P52292
4	GO:0039694	viral RNA genome replication	Biological Process	3	Q9BT40,Q9NRW3,Q02880
4	GO:0044827	modulation by host of viral genome replication	Biological Process	2	P11142,Q9H6S0
4	GO:0044829	positive regulation by host of viral genome replication	Biological Process	2	P11142,Q9H6S0
4	GO:0045069	regulation of viral genome replication	Biological Process	11	P78362,Q16531,Q96SB4,Q9UIV1,P19525,Q13325,Q7Z2W4,Q9NRW3,Q9Y6K5,Q9BT40,Q02880
4	GO:0045070	positive regulation of viral genome replication	Biological Process	5	Q02880,P78362,Q16531,Q96SB4,Q9UIV1
4	GO:0045071	negative regulation of viral genome replication	Biological Process	8	Q9BT40,Q9NRW3,P19525,P78362,Q13325,Q7Z2W4,Q96SB4,Q9Y6K5
4	GO:0032897	negative regulation of viral transcription	Biological Process	1	Q4G0J3
4	GO:0043922	negative regulation by host of viral transcription	Biological Process	1	Q9BT40
4	GO:0046782	regulation of viral transcription	Biological Process	1	Q4G0J3
4	GO:0075509	endocytosis involved in viral entry into host cell	Biological Process	1	Q9H2X3
4	GO:0046726	positive regulation by virus of viral protein levels in host cell	Biological Process	1	Q16531
4	GO:0046725	negative regulation by virus of viral protein levels in host cell	Biological Process	1	P42224
4	GO:0046719	regulation by virus of viral protein levels in host cell	Biological Process	2	P42224,Q16531
4	GO:0001892	embryonic placenta development	Biological Process	1	Q15648
4	GO:0007283	spermatogenesis	Biological Process	14	Q96PN6,Q96SI9,Q9H6S0,Q9UMX1,Q9Y2H6,Q96SB4,O00507,P20226,P46379,Q16181,Q4G0J3,Q8IXK0,Q8NB90,Q96EB6
4	GO:0007548	sex differentiation	Biological Process	5	Q13144,Q96EB6,Q9Y2H6,Q8NI77,Q8IY37
4	GO:0035234	ectopic germ cell programmed cell death	Biological Process	2	P78527,Q16531
4	GO:0045136	development of secondary sexual characteristics	Biological Process	1	Q15648
4	GO:0045137	development of primary sexual characteristics	Biological Process	5	Q13144,Q96EB6,Q9Y2H6,Q8NI77,Q8IY37
4	GO:0048608	reproductive structure development	Biological Process	7	Q13144,Q96EB6,P62753,Q15648,Q9Y2H6,Q8NI77,Q8IY37
4	GO:0060008	Sertoli cell differentiation	Biological Process	1	Q9Y2H6
4	GO:0060009	Sertoli cell development	Biological Process	1	Q9Y2H6
4	GO:0060744	mammary gland branching involved in thelarche	Biological Process	1	Q15648
4	GO:0060745	mammary gland branching involved in pregnancy	Biological Process	1	Q15648
4	GO:0007338	single fertilization	Biological Process	6	P17987,P49368,P50990,P50991,P78371,Q99832
4	GO:0001542	ovulation from ovarian follicle	Biological Process	1	Q96EB6
4	GO:0007339	binding of sperm to zona pellucida	Biological Process	6	P17987,P49368,P50990,P50991,P78371,Q99832
4	GO:0007565	female pregnancy	Biological Process	5	P47914,Q9H9Y6,P35520,Q15648,Q9H2H9
4	GO:0022605	mammalian oogenesis stage	Biological Process	1	P62753
4	GO:0030728	ovulation	Biological Process	1	Q96EB6
4	GO:0060135	maternal process involved in female pregnancy	Biological Process	2	Q15648,P35520
4	GO:0051445	regulation of meiotic cell cycle	Biological Process	7	Q9H6S0,Q8TD08,Q13042,Q9UJX2,Q9UJX3,Q9UJX4,Q9UJX5
4	GO:0051446	positive regulation of meiotic cell cycle	Biological Process	2	Q9H6S0,Q8TD08
4	GO:0030317	flagellated sperm motility	Biological Process	1	Q9UL16
4	GO:0000212	meiotic spindle organization	Biological Process	3	Q16531,P30153,Q08379
4	GO:0007131	reciprocal meiotic recombination	Biological Process	4	Q02880,Q96AY2,Q9BXW9,O60216
4	GO:0034089	establishment of meiotic sister chromatid cohesion	Biological Process	1	O60216
4	GO:0044771	meiotic cell cycle phase transition	Biological Process	1	Q8TD08
4	GO:0045132	meiotic chromosome segregation	Biological Process	7	Q02880,Q96AY2,Q9BXW9,P46379,O60216,P30153,Q8TD08
4	GO:0051232	meiotic spindle elongation	Biological Process	1	P30153
4	GO:0051307	meiotic chromosome separation	Biological Process	3	Q02880,Q96AY2,Q8TD08
4	GO:0061982	meiosis I cell cycle process	Biological Process	6	Q02880,Q96AY2,Q9BXW9,P46379,O60216,Q8TD08
4	GO:0061983	meiosis II cell cycle process	Biological Process	2	O60216,P30153
4	GO:0070192	chromosome organization involved in meiotic cell cycle	Biological Process	4	Q9BXW9,P46379,O60216,P30153
4	GO:0140013	meiotic nuclear division	Biological Process	11	Q02880,Q96AY2,Q16531,Q9BXW9,P46379,O60216,Q8NI77,P30153,Q9Y4F3,Q08379,Q8TD08
4	GO:1990918	double-strand break repair involved in meiotic recombination	Biological Process	1	Q9BXW9
4	GO:1901993	regulation of meiotic cell cycle phase transition	Biological Process	1	Q8TD08
4	GO:1903538	regulation of meiotic cell cycle process involved in oocyte maturation	Biological Process	1	P30153
4	GO:1905132	regulation of meiotic chromosome separation	Biological Process	1	Q8TD08
4	GO:1905939	regulation of gonad development	Biological Process	1	Q8IY37
4	GO:1905134	positive regulation of meiotic chromosome separation	Biological Process	1	Q8TD08
4	GO:1905941	positive regulation of gonad development	Biological Process	1	Q8IY37
4	GO:0007214	gamma-aminobutyric acid signaling pathway	Biological Process	1	P04899
4	GO:0023061	signal release	Biological Process	6	Q96EV8,P62760,P50416,Q15042,Q4J6C6,Q9P253
4	GO:0099536	synaptic signaling	Biological Process	15	Q96EV8,P04899,P39086,Q14831,Q9H2H9,P78559,Q15042,P19174,P27361,Q02952,Q15910,Q8NBU5,Q4J6C6,Q9P253,O60941
4	GO:0198738	cell-cell signaling by wnt	Biological Process	10	P78368,Q16531,Q9P0L2,P30153,P67775,B7ZLD0,P52952,Q38SD2,Q96K76,Q9NVX2
4	GO:1905114	cell surface receptor signaling pathway involved in cell-cell signaling	Biological Process	11	P78368,Q16531,Q9P0L2,P30153,P67775,B7ZLD0,Q15042,P52952,Q38SD2,Q96K76,Q9NVX2
4	GO:0001919	regulation of receptor recycling	Biological Process	1	Q6IAA8
4	GO:0046883	regulation of hormone secretion	Biological Process	2	P62760,P50416
4	GO:0099177	regulation of trans-synaptic signaling	Biological Process	13	Q96EV8,Q9H2H9,P78559,Q15042,P19174,P27361,P39086,Q02952,P04899,Q14831,Q8NBU5,Q4J6C6,Q9P253
4	GO:1903779	regulation of cardiac conduction	Biological Process	1	P52952
4	GO:0046887	positive regulation of hormone secretion	Biological Process	1	P62760
4	GO:0050806	positive regulation of synaptic transmission	Biological Process	2	Q96EV8,Q15042
4	GO:0046888	negative regulation of hormone secretion	Biological Process	1	P62760
4	GO:0050805	negative regulation of synaptic transmission	Biological Process	2	Q8NBU5,P04899
4	GO:0061337	cardiac conduction	Biological Process	2	P62258,P52952
4	GO:0001649	osteoblast differentiation	Biological Process	8	O95373,Q14596,Q9UMX1,O94874,Q9BQG0,Q9BZE4,Q9NR30,Q9P2E9
4	GO:0030278	regulation of ossification	Biological Process	3	Q14596,Q96PN6,P27361
4	GO:0030282	bone mineralization	Biological Process	1	Q14596
4	GO:0036075	replacement ossification	Biological Process	1	P35520
4	GO:0045778	positive regulation of ossification	Biological Process	1	Q96PN6
4	GO:0061138	morphogenesis of a branching epithelium	Biological Process	2	P29590,Q15648
4	GO:0001817	regulation of cytokine production	Biological Process	22	P19525,Q9NR30,P38398,Q7Z2W4,Q08722,O60216,P29590,P49407,O15111,P42224,O14730,Q9H1D9,Q9NW08,Q9Y6K5,Q92974,Q02952,Q9Y6D5,Q96EB6,Q96RT1,Q15910,O00425,Q9NZI8
4	GO:0001818	negative regulation of cytokine production	Biological Process	6	O60216,P29590,P49407,Q9Y6K5,Q96RT1,Q15910
4	GO:0001819	positive regulation of cytokine production	Biological Process	15	Q9NR30,P38398,Q7Z2W4,P19525,O15111,P42224,O14730,Q9H1D9,Q9NW08,Q9Y6K5,O60216,Q92974,Q02952,Q9Y6D5,Q96EB6
4	GO:0002534	cytokine production involved in inflammatory response	Biological Process	1	Q15910
4	GO:0010573	vascular endothelial growth factor production	Biological Process	1	P38398
4	GO:0032602	chemokine production	Biological Process	3	P19525,Q9Y6K5,Q96RT1
4	GO:0032606	type I interferon production	Biological Process	7	Q7Z2W4,O15111,P42224,O14730,Q9H1D9,Q9NW08,Q9Y6K5
4	GO:0032609	interferon-gamma production	Biological Process	1	Q08722
4	GO:0032612	interleukin-1 production	Biological Process	2	O60216,P29590
4	GO:0032613	interleukin-10 production	Biological Process	2	Q08722,O60216
4	GO:0032615	interleukin-12 production	Biological Process	1	Q08722
4	GO:0032635	interleukin-6 production	Biological Process	3	Q08722,P49407,Q92974
4	GO:0032637	interleukin-8 production	Biological Process	1	P49407
4	GO:0071706	tumor necrosis factor superfamily cytokine production	Biological Process	6	Q08722,O60216,Q02952,Q92974,Q9Y6D5,Q9Y6K5
4	GO:0003012	muscle system process	Biological Process	8	O15111,Q8WZ42,Q96PN6,Q15813,Q15910,P52952,Q9Y575,P42345
4	GO:0003013	circulatory system process	Biological Process	14	P62258,P42224,Q02952,Q9Y5X3,P52952,Q9Y575,P42345,Q8WZ42,P35520,Q96PN6,P04899,P30825,Q15758,Q9H2H9
4	GO:0003014	renal system process	Biological Process	2	P04899,Q9BT40
4	GO:0003016	respiratory system process	Biological Process	1	Q9NYC9
4	GO:0022600	digestive system process	Biological Process	1	P11171
4	GO:0044057	regulation of system process	Biological Process	6	P62258,Q96PN6,P52952,Q9Y575,P11171,Q9BT40
4	GO:0050877	nervous system process	Biological Process	16	O15111,P49407,Q15582,Q6P4Q7,Q14831,Q8NBU5,P78559,P42345,P27361,P42858,P49588,Q9NUP1,Q96P11,Q15042,Q9NYC9,Q9UL16
4	GO:0009790	embryo development	Biological Process	35	P04637,P19174,P49917,Q8TCT9,Q9BT40,P78527,Q9NVX2,P26373,Q6DKI1,Q9Y3A4,Q14691,Q86XI2,Q9BRT9,Q9GZM8,P42898,Q2Q1W2,Q96Q89,Q9UMX1,Q15648,P52952,P62753,Q13428,Q9H9Y6,Q16181,Q8TDH9,P11387,O75569,P27361,P38398,Q71F23,Q16531,P46379,P67809,O75367,P27635
4	GO:0035295	tube development	Biological Process	21	P15104,P19338,P78362,Q08722,Q15582,Q15648,Q96EB6,P52952,P42898,Q2Q1W2,Q96Q89,Q9UMX1,P29590,P42224,Q9BUZ4,P46379,P19174,P38398,P27361,P40429,Q8NI77
4	GO:0046660	female sex differentiation	Biological Process	2	Q13144,Q96EB6
4	GO:0046661	male sex differentiation	Biological Process	3	Q9Y2H6,Q8NI77,Q8IY37
4	GO:0048731	system development	Biological Process	118	Q13428,P15104,P19338,P78362,Q08722,Q15582,Q15648,Q96EB6,Q13144,P52952,P62258,Q02880,Q8NAT1,Q9P0L2,P46379,Q9NVX2,P42898,Q2Q1W2,Q96Q89,Q9UMX1,P11310,P62753,Q92688,P35520,P04637,Q56NI9,P42345,P78527,P49917,O96028,P42224,O00425,P39086,Q14155,Q14738,Q66K74,Q6SZW1,Q99707,Q9BPU6,Q9NYB9,Q9NZI8,Q92845,P78559,Q8TER5,Q96F07,Q7L2E3,Q99961,Q9Y2A7,P28370,Q09028,Q15042,Q8IY37,Q8NB90,Q9NQZ2,Q9UJX3,Q9BQ70,Q9GZM8,…
4	GO:0048736	appendage development	Biological Process	1	Q15648
4	GO:2000026	regulation of multicellular organismal development	Biological Process	30	P42224,P04637,Q92845,Q15910,Q16181,P29590,Q14596,P42345,Q96P11,Q86U86,Q9BXW9,O75367,Q15648,P78527,Q96QR8,P38646,P19174,P38398,Q96EB6,Q96PN6,P46379,P49917,Q96T58,Q9BPU6,P52952,O94874,P41743,O95373,P15104,Q12923
4	GO:0003002	regionalization	Biological Process	7	P04637,P78527,Q9NVX2,Q9Y483,Q06587,Q9UMX1,P52952
4	GO:0007379	segment specification	Biological Process	1	Q9Y483
4	GO:0009799	specification of symmetry	Biological Process	3	P52952,Q9UMX1,Q9UL16
4	GO:0060581	cell fate commitment involved in pattern specification	Biological Process	1	Q9UMX1
4	GO:0035019	somatic stem cell population maintenance	Biological Process	1	P49917
4	GO:0097150	neuronal stem cell population maintenance	Biological Process	2	Q9BXW9,Q9NZI8
4	GO:1902455	negative regulation of stem cell population maintenance	Biological Process	1	Q09028
4	GO:1902459	positive regulation of stem cell population maintenance	Biological Process	1	Q09028
4	GO:2000036	regulation of stem cell population maintenance	Biological Process	1	Q09028
4	GO:0022405	hair cycle process	Biological Process	3	Q7Z3Y8,Q5C9Z4,O94887
4	GO:0048265	response to pain	Biological Process	1	P42345
4	GO:0046620	regulation of organ growth	Biological Process	1	P52952
4	GO:0060419	heart growth	Biological Process	1	P52952
4	GO:0042633	hair cycle	Biological Process	3	O94887,Q7Z3Y8,Q5C9Z4
4	GO:0001974	blood vessel remodeling	Biological Process	1	P35520
4	GO:0034103	regulation of tissue remodeling	Biological Process	1	P04637
4	GO:0046849	bone remodeling	Biological Process	1	Q38SD2
4	GO:0060056	mammary gland involution	Biological Process	1	P29590
4	GO:0001659	temperature homeostasis	Biological Process	1	Q6IAN0
4	GO:0001894	tissue homeostasis	Biological Process	1	Q38SD2
4	GO:0050891	multicellular organismal water homeostasis	Biological Process	1	Q9BT40
4	GO:0097009	energy homeostasis	Biological Process	2	O43159,Q96EB6
4	GO:0007596	blood coagulation	Biological Process	3	Q9BQB6,Q9NUP1,Q96EV8
4	GO:0050818	regulation of coagulation	Biological Process	1	Q9BQB6
4	GO:0050820	positive regulation of coagulation	Biological Process	1	Q9BQB6
4	GO:0050881	musculoskeletal movement	Biological Process	3	O15111,P42345,P78559
4	GO:0010632	regulation of epithelial cell migration	Biological Process	4	P15104,P19174,Q96EB6,P42345
4	GO:0010718	positive regulation of epithelial to mesenchymal transition	Biological Process	2	P42345,Q15910
4	GO:0014742	positive regulation of muscle hypertrophy	Biological Process	1	Q96PN6
4	GO:0033601	positive regulation of mammary gland epithelial cell proliferation	Biological Process	1	Q86VI3
4	GO:0045618	positive regulation of keratinocyte differentiation	Biological Process	2	O75367,Q15648
4	GO:0045830	positive regulation of isotype switching	Biological Process	2	O96028,Q96QE3
4	GO:0051962	positive regulation of nervous system development	Biological Process	6	Q96PN6,P42345,P49917,Q96T58,O94874,P41743
4	GO:1903524	positive regulation of blood circulation	Biological Process	1	P52952
4	GO:1904018	positive regulation of vasculature development	Biological Process	3	P19174,P38398,Q96EB6
4	GO:1904179	positive regulation of adipose tissue development	Biological Process	1	Q96EB6
4	GO:1905209	positive regulation of cardiocyte differentiation	Biological Process	1	P52952
4	GO:2001153	positive regulation of renal water transport	Biological Process	1	Q9BT40
4	GO:0010719	negative regulation of epithelial to mesenchymal transition	Biological Process	2	P67775,Q9P0L2
4	GO:0045617	negative regulation of keratinocyte differentiation	Biological Process	1	Q15910
4	GO:0045932	negative regulation of muscle contraction	Biological Process	1	Q96PN6
4	GO:0051961	negative regulation of nervous system development	Biological Process	4	P04637,Q92845,Q9BPU6,Q12923
4	GO:0090185	negative regulation of kidney development	Biological Process	1	P42224
4	GO:0140199	negative regulation of adenylate cyclase-activating adrenergic receptor signaling pathway involved in heart process	Biological Process	1	P04899
4	GO:1901343	negative regulation of vasculature development	Biological Process	2	P29590,P42224
4	GO:1903523	negative regulation of blood circulation	Biological Process	1	Q96PN6
4	GO:0034377	plasma lipoprotein particle assembly	Biological Process	1	O95573
4	GO:0090132	epithelium migration	Biological Process	4	P15104,P19174,Q96EB6,P42345
4	GO:0000902	cell morphogenesis	Biological Process	31	P78559,Q02880,Q66K74,Q8TER5,Q96F07,Q9BPU6,Q9UL63,Q16181,Q9GZM8,P83731,Q96PN6,Q9BTW9,Q96EV8,Q96Q89,Q9Y2A7,Q6SZW1,Q15813,Q9NYB9,O60749,Q13459,Q13596,Q92558,Q9NZI8,Q9HCE1,Q14155,P78527,P40123,Q01518,Q15020,Q15648,Q92974
4	GO:0002089	lens morphogenesis in camera-type eye	Biological Process	1	Q9NYB9
4	GO:0003149	membranous septum morphogenesis	Biological Process	1	O96028
4	GO:0003151	outflow tract morphogenesis	Biological Process	1	P52952
4	GO:0003179	heart valve morphogenesis	Biological Process	2	P52952,P42345
4	GO:0003206	cardiac chamber morphogenesis	Biological Process	4	P52952,O96028,Q15648,P04637
4	GO:0009887	animal organ morphogenesis	Biological Process	22	P52952,Q9UMX1,P35520,P42345,O96028,Q15648,P42224,Q8TDH9,P41743,O75569,P27361,Q06587,Q9NVX2,Q9BXW9,Q9UID3,Q8WZ42,P29590,Q7Z3C6,P04637,P40429,Q6P4Q7,Q9NYB9
4	GO:0010171	body morphogenesis	Biological Process	1	Q15042
4	GO:0021575	hindbrain morphogenesis	Biological Process	2	P35520,P11021
4	GO:0021587	cerebellum morphogenesis	Biological Process	2	P11021,P35520
4	GO:0022603	regulation of anatomical structure morphogenesis	Biological Process	16	Q9UL63,Q16181,P29590,P42224,P19174,P38398,Q96EB6,Q96PN6,Q6SZW1,Q9BPU6,Q9NYB9,Q96EV8,Q9HCE1,Q14155,P15104,P78527
4	GO:0031069	hair follicle morphogenesis	Biological Process	1	Q7Z3Y8
4	GO:0035107	appendage morphogenesis	Biological Process	1	Q15648
4	GO:0035239	tube morphogenesis	Biological Process	16	P15104,P19338,P78362,Q08722,Q15582,Q15648,Q96EB6,P52952,P42898,Q2Q1W2,Q96Q89,Q9UMX1,P29590,P42224,P19174,P38398
4	GO:0048598	embryonic morphogenesis	Biological Process	13	P42898,Q2Q1W2,Q96Q89,Q9UMX1,P52952,P04637,P62753,Q8TDH9,Q15648,O75569,P27361,O75367,P67809
4	GO:0048729	tissue morphogenesis	Biological Process	11	P42898,Q2Q1W2,Q96Q89,Q9UMX1,P52952,Q15648,P42224,Q7Z3Y8,Q8WZ42,P29590,P42345
4	GO:0060323	head morphogenesis	Biological Process	1	Q15042
4	GO:0060325	face morphogenesis	Biological Process	1	Q15042
4	GO:0060411	cardiac septum morphogenesis	Biological Process	3	P52952,O96028,P04637
4	GO:0060560	developmental growth involved in morphogenesis	Biological Process	5	Q96PN6,Q15648,Q92558,Q96F07,Q9GZM8
4	GO:0060561	apoptotic process involved in morphogenesis	Biological Process	2	P52952,P29590
4	GO:0061383	trabecula morphogenesis	Biological Process	2	P52952,Q15648
4	GO:0072028	nephron morphogenesis	Biological Process	1	P42224
4	GO:0016188	synaptic vesicle maturation	Biological Process	1	Q9UI12
4	GO:0048757	pigment granule maturation	Biological Process	2	O43747,Q8TDH9
4	GO:0071695	anatomical structure maturation	Biological Process	5	Q5TAX3,O94887,Q9NZJ7,Q5C9Z4,P30153
4	GO:0021577	hindbrain structural organization	Biological Process	1	P11021
4	GO:0021589	cerebellum structural organization	Biological Process	1	P11021
4	GO:0001832	blastocyst growth	Biological Process	4	Q14691,Q86XI2,Q9BRT9,Q9GZM8
4	GO:0042246	tissue regeneration	Biological Process	1	Q15910
4	GO:0048638	regulation of developmental growth	Biological Process	2	Q96PN6,P52952
4	GO:0048639	positive regulation of developmental growth	Biological Process	1	Q96PN6
4	GO:0055017	cardiac muscle tissue growth	Biological Process	1	P52952
4	GO:0001525	angiogenesis	Biological Process	11	P29590,P42224,P19174,P38398,Q96EB6,P15104,P19338,P78362,Q08722,Q15582,Q15648
4	GO:0001704	formation of primary germ layer	Biological Process	1	O75367
4	GO:0001756	somitogenesis	Biological Process	3	P04637,P78527,Q9NVX2
4	GO:0001825	blastocyst formation	Biological Process	3	Q9NVX2,Q6DKI1,Q9Y3A4
4	GO:0003207	cardiac chamber formation	Biological Process	1	P52952
4	GO:0010927	cellular component assembly involved in morphogenesis	Biological Process	2	Q8WZ42,P52952
4	GO:0014029	neural crest formation	Biological Process	2	Q13428,Q9H9Y6
4	GO:0030220	platelet formation	Biological Process	1	P78527
4	GO:0035148	tube formation	Biological Process	4	P42898,Q2Q1W2,Q96Q89,Q9UMX1
4	GO:0048645	animal organ formation	Biological Process	1	P27361
4	GO:0060343	trabecula formation	Biological Process	1	P52952
4	GO:0097186	amelogenesis	Biological Process	1	Q6P4Q7
4	GO:0001568	blood vessel development	Biological Process	13	P15104,P19338,P78362,Q08722,Q15582,Q15648,Q96EB6,P52952,P29590,P42224,Q9UMX1,P19174,P38398
4	GO:0001824	blastocyst development	Biological Process	8	Q6DKI1,Q9Y3A4,Q9NVX2,Q14691,Q86XI2,Q9BRT9,Q9GZM8,P26373
4	GO:0001942	hair follicle development	Biological Process	2	Q7Z3Y8,Q5C9Z4
4	GO:0002088	lens development in camera-type eye	Biological Process	2	Q9NYB9,Q15648
4	GO:0003170	heart valve development	Biological Process	2	P42345,P52952
4	GO:0003205	cardiac chamber development	Biological Process	5	P52952,O96028,Q15648,Q9UMX1,P04637
4	GO:0003279	cardiac septum development	Biological Process	4	P52952,O96028,Q9UMX1,P04637
4	GO:0009888	tissue development	Biological Process	40	P04637,P78527,Q9NVX2,P42898,Q2Q1W2,Q96Q89,Q9UMX1,P52952,Q15582,Q15648,P42224,P67775,P67809,P42345,Q15910,Q9P0L2,Q13428,Q9H9Y6,Q14596,P50416,Q16762,Q7Z3Y8,Q86VI3,P18847,O75367,Q9NTW7,Q5C9Z4,P27361,Q8WZ42,P11310,Q9Y2H6,P35520,P29590,Q6IAN0,Q6P4Q7,Q9NYB9,P07437,Q2TB10,O95373,Q96EB6
4	GO:0016358	dendrite development	Biological Process	9	Q96EV8,Q6SZW1,Q9P0L2,Q9BPU6,Q9NYB9,Q9NZI8,Q15910,P78559,Q66K74
4	GO:0021517	ventral spinal cord development	Biological Process	1	Q9UMX1
4	GO:0021536	diencephalon development	Biological Process	1	Q15042
4	GO:0021537	telencephalon development	Biological Process	6	P62258,Q13144,Q15910,Q9GZM8,Q96P11,Q9NZI8
4	GO:0021543	pallium development	Biological Process	6	P62258,Q13144,Q15910,Q9GZM8,Q96P11,Q9NZI8
4	GO:0021549	cerebellum development	Biological Process	5	P35520,P11021,P49588,Q15910,P04637
4	GO:0021675	nerve development	Biological Process	1	P83731
4	GO:0021680	cerebellar Purkinje cell layer development	Biological Process	2	P11021,P49588
4	GO:0021695	cerebellar cortex development	Biological Process	3	P11021,P49588,Q15910
4	GO:0021766	hippocampus development	Biological Process	3	P62258,Q13144,Q15910
4	GO:0021854	hypothalamus development	Biological Process	1	Q15042
4	GO:0021987	cerebral cortex development	Biological Process	3	Q9GZM8,P62258,Q96P11
4	GO:0022037	metencephalon development	Biological Process	5	P04637,P35520,P11021,P49588,Q15910
4	GO:0022038	corpus callosum development	Biological Process	1	Q96P11
4	GO:0030900	forebrain development	Biological Process	8	P62258,Q13144,Q15910,Q9GZM8,Q15042,Q96P11,Q9NZI8,Q02880
4	GO:0030901	midbrain development	Biological Process	2	P11021,P62258
4	GO:0030902	hindbrain development	Biological Process	5	P04637,P35520,P11021,P49588,Q15910
4	GO:0031018	endocrine pancreas development	Biological Process	1	Q2TB10
4	GO:0031099	regeneration	Biological Process	4	Q15910,Q15648,Q99707,P50416
4	GO:0048513	animal organ development	Biological Process	88	Q13144,Q96EB6,P46379,Q9NVX2,P11310,Q15648,P62753,P52952,Q9UMX1,P35520,Q15582,P04637,Q56NI9,P42345,P78527,P49917,O96028,P42224,P28370,Q09028,Q15042,Q66K74,Q8IY37,Q8NB90,Q9NQZ2,Q9UJX3,Q9BQ70,Q13643,Q15910,P67775,Q9P0L2,Q13428,Q9H9Y6,P11021,Q92688,P49588,P62258,Q9GZM8,Q96P11,Q9NZI8,P29590,Q02880,Q9Y4B6,O94874,P38646,Q15758,Q86XI2,Q6IAN0,O94887,Q9BUZ4,Q14596,P27361,Q2TB10,Q7Z3Y8,Q8TDH9,Q86VI3,P18847,…
4	GO:0048839	inner ear development	Biological Process	3	Q8TDH9,P49736,Q92688
4	GO:0048840	otolith development	Biological Process	1	Q8TDH9
4	GO:0048857	neural nucleus development	Biological Process	2	P11021,P62258
4	GO:0060021	roof of mouth development	Biological Process	1	Q92688
4	GO:0060041	retina development in camera-type eye	Biological Process	3	Q15648,P83731,Q96EV8
4	GO:0060322	head development	Biological Process	27	P28370,P46379,P78527,Q09028,Q15042,Q15648,Q66K74,Q8IY37,Q8NB90,Q9NQZ2,Q9UJX3,P04637,P35520,P11021,Q92688,P49588,Q15910,P62258,Q13144,Q9GZM8,Q96P11,Q9NZI8,Q02880,Q9BXW9,Q9UID3,P27361,O15067
4	GO:0060324	face development	Biological Process	2	Q15042,P27361
4	GO:0060996	dendritic spine development	Biological Process	2	Q9NYB9,Q96EV8
4	GO:0061061	muscle structure development	Biological Process	12	P52952,Q15648,Q13643,Q96EB6,P42345,Q8WZ42,P18847,P01111,Q86U86,O15111,Q15910,P11310
4	GO:0072006	nephron development	Biological Process	2	P42224,Q9BW27
4	GO:0090102	cochlea development	Biological Process	1	P49736
4	GO:1902742	apoptotic process involved in development	Biological Process	2	P52952,P29590
4	GO:0045682	regulation of epidermis development	Biological Process	3	Q15910,O75367,Q15648
4	GO:0050773	regulation of dendrite development	Biological Process	4	Q6SZW1,Q9BPU6,Q15910,Q9P0L2
4	GO:0060998	regulation of dendritic spine development	Biological Process	1	Q96EV8
4	GO:0090183	regulation of kidney development	Biological Process	2	P42224,Q15910
4	GO:1904177	regulation of adipose tissue development	Biological Process	1	Q96EB6
4	GO:1904748	regulation of apoptotic process involved in development	Biological Process	1	P29590
4	GO:0045683	negative regulation of epidermis development	Biological Process	1	Q15910
4	GO:0061000	negative regulation of dendritic spine development	Biological Process	1	Q96EV8
4	GO:0045684	positive regulation of epidermis development	Biological Process	2	O75367,Q15648
4	GO:1900006	positive regulation of dendrite development	Biological Process	1	Q15910
4	GO:1904747	positive regulation of apoptotic process involved in development	Biological Process	1	P29590
4	GO:2000394	positive regulation of lamellipodium morphogenesis	Biological Process	1	Q14155
4	GO:0014834	skeletal muscle satellite cell maintenance involved in skeletal muscle regeneration	Biological Process	1	Q15910
4	GO:0050920	regulation of chemotaxis	Biological Process	1	P27361
4	GO:2000145	regulation of cell motility	Biological Process	18	P15104,P19174,P27361,Q14155,Q92839,P04899,P11021,Q75N03,Q09028,Q8TD08,Q9BZE4,Q96EB6,P42345,Q9UL16,Q02952,Q08722,Q92974,Q96Q89
4	GO:2000146	negative regulation of cell motility	Biological Process	4	Q92839,Q09028,Q8TD08,Q9BZE4
4	GO:0050921	positive regulation of chemotaxis	Biological Process	1	P27361
4	GO:2000147	positive regulation of cell motility	Biological Process	12	P19174,P27361,Q14155,P04899,P11021,Q75N03,Q96EB6,P42345,Q02952,Q08722,Q92974,Q96Q89
4	GO:0006935	chemotaxis	Biological Process	7	Q8TER5,Q96F07,Q9BPU6,P27361,P83731,P40429,Q9BW27
4	GO:0001539	cilium or flagellum-dependent cell motility	Biological Process	2	Q9UL16,Q9NYC9
4	GO:0016477	cell migration	Biological Process	31	Q01518,P62258,Q02880,Q8NAT1,Q9P0L2,P15104,P19174,P27361,P29590,Q14155,Q92839,Q9GZM8,P04899,P11021,Q75N03,Q09028,Q8TD08,Q9BZE4,Q96EB6,P40429,Q9BW27,P42345,Q02952,Q08722,Q92974,Q96Q89,O00507,P41743,P57737,Q9NYB9,Q9Y2A7
4	GO:0048070	regulation of developmental pigmentation	Biological Process	1	Q8TDH9
4	GO:0050931	pigment cell differentiation	Biological Process	2	O43747,Q8TDH9
4	GO:0044406	adhesion of symbiont to host	Biological Process	1	Q9H2X3
4	GO:0051701	biological process involved in interaction with host	Biological Process	5	Q9H2X3,Q16531,Q9P253,Q6I9Y2,Q93009
4	GO:0051702	biological process involved in interaction with symbiont	Biological Process	4	Q9BT40,P11142,Q9H6S0,Q16531
4	GO:0009615	response to virus	Biological Process	18	P29590,P42224,Q96DX7,Q9Y6K5,O14730,Q8IZ81,P19525,Q13325,Q7Z2W4,Q9H1D9,Q9HCE1,Q9NR30,Q9NRW3,Q9NVU0,Q9NW08,Q9UIV1,O15111,O75569
4	GO:0009617	response to bacterium	Biological Process	7	P27361,O15111,P40429,Q02952,Q96RT1,Q9Y6K5,P62888
4	GO:0019730	antimicrobial humoral response	Biological Process	1	P62888
4	GO:0098542	defense response to other organism	Biological Process	35	P78527,P29590,P42224,Q96DX7,Q9Y6K5,O14730,P07437,O43747,Q9NRW3,O00743,O15111,O95373,P57088,P78362,Q13325,Q6SZW1,Q7Z2W4,Q92974,Q96SB4,Q9BUZ4,Q9H1D9,Q9H2X3,Q9NR30,Q9NVU0,Q9NW08,Q8IZ81,P62888,P19525,Q9HCE1,Q9UIV1,P04637,Q15648,P40429,Q08722,P27361
4	GO:0050942	positive regulation of pigment cell differentiation	Biological Process	1	Q8TDH9
4	GO:0002833	positive regulation of response to biotic stimulus	Biological Process	7	P78527,O43747,O14730,Q9H1D9,Q9NW08,Q15648,Q7Z2W4
4	GO:0031349	positive regulation of defense response	Biological Process	8	P78527,O43747,O14730,Q9H1D9,Q9NW08,Q08722,Q15648,P27361
4	GO:0032103	positive regulation of response to external stimulus	Biological Process	9	P78527,P27361,O43747,O14730,Q9H1D9,Q9NW08,Q08722,Q15648,Q7Z2W4
4	GO:0060760	positive regulation of response to cytokine stimulus	Biological Process	2	Q96DX7,Q15648
4	GO:1902884	positive regulation of response to oxidative stress	Biological Process	2	Q96IZ0,O75367
4	GO:1903036	positive regulation of response to wounding	Biological Process	1	P42345
4	GO:2001025	positive regulation of response to drug	Biological Process	1	Q9UMX1
4	GO:0010875	positive regulation of cholesterol efflux	Biological Process	1	Q96EB6
4	GO:0032411	positive regulation of transporter activity	Biological Process	1	P42858
4	GO:0032892	positive regulation of organic acid transport	Biological Process	3	Q15042,Q96EV8,Q9H2H9
4	GO:0043270	positive regulation of ion transport	Biological Process	6	P52952,P42858,P19174,Q15042,Q96EV8,Q9H2H9
4	GO:0045807	positive regulation of endocytosis	Biological Process	4	P49407,Q8NBU5,Q96EV8,Q75N03
4	GO:0050766	positive regulation of phagocytosis	Biological Process	1	Q08722
4	GO:0051047	positive regulation of secretion	Biological Process	6	Q96EV8,P62760,O43747,Q8WZ42,Q15042,O95573
4	GO:0051222	positive regulation of protein transport	Biological Process	9	P62760,O95817,O95573,P62258,Q92688,Q8WZ42,Q96Q89,O95376,Q96PN6
4	GO:0051590	positive regulation of neurotransmitter transport	Biological Process	2	Q96EV8,Q15042
4	GO:0051954	positive regulation of amine transport	Biological Process	3	Q15042,Q96EV8,Q9H2H9
4	GO:1900370	positive regulation of post-transcriptional gene silencing by RNA	Biological Process	1	Q2Q1W2
4	GO:1904951	positive regulation of establishment of protein localization	Biological Process	16	P62760,O95817,O95573,P62258,Q92688,Q8WZ42,Q96Q89,O95376,Q96PN6,P17987,P40227,P49368,P50990,P50991,P78371,Q99832
4	GO:0051901	positive regulation of mitochondrial depolarization	Biological Process	1	Q96PN6
4	GO:0002832	negative regulation of response to biotic stimulus	Biological Process	5	O14730,O00743,P78527,Q9UIV1,Q9Y6K5
4	GO:0031348	negative regulation of defense response	Biological Process	6	P19174,O14730,O00743,P78527,Q9UIV1,Q9Y6K5
4	GO:0032102	negative regulation of response to external stimulus	Biological Process	6	P19174,O14730,O00743,P78527,Q9UIV1,Q9Y6K5
4	GO:0060761	negative regulation of response to cytokine stimulus	Biological Process	2	Q9UIV1,Q9Y6K5
4	GO:1902883	negative regulation of response to oxidative stress	Biological Process	1	O75367
4	GO:0032410	negative regulation of transporter activity	Biological Process	1	P62258
4	GO:0032891	negative regulation of organic acid transport	Biological Process	1	Q14831
4	GO:0043271	negative regulation of ion transport	Biological Process	4	Q14831,Q9BT40,Q9UKS6,P62258
4	GO:0045806	negative regulation of endocytosis	Biological Process	1	Q9UKS6
4	GO:0050765	negative regulation of phagocytosis	Biological Process	1	Q08722
4	GO:0051048	negative regulation of secretion	Biological Process	3	Q14831,P04899,P62760
4	GO:0051224	negative regulation of protein transport	Biological Process	3	Q9UMX1,P62760,Q9BT40
4	GO:0051953	negative regulation of amine transport	Biological Process	1	Q14831
4	GO:1900369	negative regulation of post-transcriptional gene silencing by RNA	Biological Process	1	P04637
4	GO:1904950	negative regulation of establishment of protein localization	Biological Process	3	Q9UMX1,P62760,Q9BT40
4	GO:0010883	regulation of lipid storage	Biological Process	2	P50416,Q96EB6
4	GO:0032880	regulation of protein localization	Biological Process	38	Q9GZM8,P62760,O95817,Q9UMX1,O95573,O14980,P62258,Q92688,Q8WZ42,P50416,O96028,Q9BT40,Q96Q89,Q6IAA8,P42345,O95373,P78559,P41743,O95376,Q96PN6,P11142,P15104,P06748,P11171,O75367,P29590,Q9BVP2,Q9NVN8,P17987,P40227,P49368,P50990,P50991,P78371,Q99832,Q4G0J3,Q7L2J0,O94874
4	GO:0051049	regulation of transport	Biological Process	41	Q96EV8,Q9UL63,P49407,Q8NBU5,Q8TD08,Q9HCU5,P29590,P52952,Q9BT40,Q6IAA8,Q96EB6,Q14831,Q9UKS6,P42858,Q9GZM8,P62760,O95817,Q9UMX1,O95573,O43747,Q75N03,P04899,P41743,O14980,P62258,Q92688,Q8WZ42,Q08722,P50416,P19174,P11171,Q15042,Q96Q89,Q9H2H9,O95376,Q96PN6,P11142,Q93009,Q4J6C6,Q9P253,P27361
4	GO:1904872	regulation of telomerase RNA localization to Cajal body	Biological Process	8	P17987,P40227,P49368,P50990,P50991,P78371,Q99832,Q01780
4	GO:0009649	entrainment of circadian clock	Biological Process	2	P04637,P29590
4	GO:0002831	regulation of response to biotic stimulus	Biological Process	15	P78527,P29590,P42224,Q96DX7,O14730,O43747,Q9H1D9,Q9NW08,O00743,Q8IZ81,Q15648,Q9UIV1,Q9Y6K5,Q7Z2W4,P27361
4	GO:0032101	regulation of response to external stimulus	Biological Process	20	P78527,P29590,P42224,Q96DX7,P19174,P27361,Q9BQB6,O14730,O43747,Q9H1D9,Q9NW08,O00743,Q8IZ81,O94874,Q9BXW9,Q08722,Q15648,Q9UIV1,Q9Y6K5,Q7Z2W4
4	GO:0043502	regulation of muscle adaptation	Biological Process	1	Q96PN6
4	GO:0060759	regulation of response to cytokine stimulus	Biological Process	4	Q96DX7,Q15648,Q9UIV1,Q9Y6K5
4	GO:0080134	regulation of response to stress	Biological Process	45	P78527,P29590,P42224,Q96DX7,P19174,P38398,P49848,Q9NXR7,Q9BQB6,P27361,Q14596,P19525,O14730,O43747,P04637,P06748,O43324,Q96EB6,Q9H1D9,Q9NW08,O00743,Q9BUZ4,Q8IZ81,O94874,Q9BXW9,Q08722,Q15648,Q9UIV1,Q9Y6K5,P42345,Q96IZ0,P61254,Q96QE3,Q92974,Q96K76,O75367,Q96PN6,P11021,P57088,P46379,Q709C8,P35659,Q86U86,O96028,Q02880
4	GO:2001023	regulation of response to drug	Biological Process	1	Q9UMX1
4	GO:0070167	regulation of biomineral tissue development	Biological Process	1	Q14596
4	GO:0030193	regulation of blood coagulation	Biological Process	1	Q9BQB6
4	GO:0001666	response to hypoxia	Biological Process	8	P04637,P35520,P42345,Q96EB6,Q9Y4P3,O60216,P29590,P42898
4	GO:0002931	response to ischemia	Biological Process	1	P04637
4	GO:0003299	muscle hypertrophy in response to stress	Biological Process	1	Q15910
4	GO:0006952	defense response	Biological Process	42	P78527,P29590,P42224,Q96DX7,P19174,O15111,P42345,Q08722,Q6IAN0,Q8NE71,Q9Y6K5,O14730,P07437,O43747,Q9NRW3,O00743,O95373,P57088,P78362,Q13325,Q6SZW1,Q7Z2W4,Q92974,Q96SB4,Q9BUZ4,Q9H1D9,Q9H2X3,Q9NR30,Q9NVU0,Q9NW08,Q8IZ81,O94874,Q9BXW9,P62888,P19525,Q9HCE1,Q9UIV1,P04637,Q15648,P40429,P27361,Q15910
4	GO:0006970	response to osmotic stress	Biological Process	4	P04637,P42345,Q92974,Q99576
4	GO:0006979	response to oxidative stress	Biological Process	17	P29590,O15111,O75569,Q8TCT9,Q9BXW9,P27361,Q9UER7,P42224,Q96EB6,Q02880,Q15910,Q9H8Y5,P04637,Q96IZ0,O75367,Q96PN6,O75475
4	GO:0009408	response to heat	Biological Process	9	O95817,P17066,P62258,Q9UER7,P42345,Q96EB6,O75475,Q13144,Q14232
4	GO:0009409	response to cold	Biological Process	1	P11310
4	GO:0009611	response to wounding	Biological Process	7	Q96EV8,Q9BQB6,Q99707,Q6SZW1,Q9NUP1,P42345,Q9HAN9
4	GO:0032057	negative regulation of translational initiation in response to stress	Biological Process	1	P29590
4	GO:0035966	response to topologically incorrect protein	Biological Process	14	P11142,P17066,Q96CS3,P11021,P18847,P19525,Q9Y4P3,O95817,Q9UER7,Q8IXB1,Q9NXW2,P46379,O94874,P57088
4	GO:0042594	response to starvation	Biological Process	15	P11142,P15104,P42345,P49754,Q96EB6,P18847,P19525,P27361,O43159,P04637,P08243,P11021,Q9BQG0,Q9Y4P3,P11310
4	GO:0009581	detection of external stimulus	Biological Process	1	Q8WZ42
4	GO:0009612	response to mechanical stimulus	Biological Process	8	Q96SI9,Q01831,Q8WZ42,P42858,O95817,P27361,Q9UKL3,P42224
4	GO:0009991	response to extracellular stimulus	Biological Process	22	P04899,P42224,P42345,P11142,P15104,P49754,Q96EB6,P50416,Q6IAA8,P42898,P18847,P19525,P27361,O43159,P04637,P08243,P11021,Q9BQG0,Q9Y4P3,P35520,P11310,Q15648
4	GO:0043207	response to external biotic stimulus	Biological Process	38	P78527,P29590,P42224,Q96DX7,O15111,O75569,P19525,Q7Z2W4,Q9Y6K5,P27361,P40429,Q02952,Q96RT1,O14730,P07437,O43747,Q9NRW3,O00743,O95373,P57088,P78362,Q13325,Q6SZW1,Q92974,Q96SB4,Q9BUZ4,Q9H1D9,Q9H2X3,Q9NR30,Q9NVU0,Q9NW08,Q8IZ81,P62888,Q9HCE1,Q9UIV1,P04637,Q15648,Q08722
4	GO:0071496	cellular response to external stimulus	Biological Process	19	P11142,P15104,P42345,P49754,Q96EB6,Q6IAA8,P18847,P19525,P27361,O43159,P04637,P08243,P11021,Q9BQG0,Q9Y4P3,P35520,Q15648,O95817,Q9UKL3
4	GO:0009266	response to temperature stimulus	Biological Process	10	O75475,P42345,Q13144,Q14232,P11310,O95817,P17066,P62258,Q9UER7,Q96EB6
4	GO:0009314	response to radiation	Biological Process	16	P29590,P04637,P49917,P38398,Q96RU2,Q9NXR7,Q01831,P78527,Q9BXW9,P06748,P61254,Q16531,Q96K76,Q9Y3T9,Q96EB6,Q15054
4	GO:0009582	detection of abiotic stimulus	Biological Process	1	Q8WZ42
4	GO:0051602	response to electrical stimulus	Biological Process	1	Q02952
4	GO:0070482	response to oxygen levels	Biological Process	8	O60216,P29590,P42898,P04637,P35520,P42345,Q96EB6,Q9Y4P3
4	GO:0071214	cellular response to abiotic stimulus	Biological Process	18	P04637,P06748,P61254,Q16531,Q96K76,Q96RU2,Q9Y3T9,Q01831,Q96EB6,O95817,P27361,Q9UKL3,P42345,Q92974,P38398,P49917,Q9NXR7,Q15054
4	GO:0009725	response to hormone	Biological Process	27	Q15648,P27361,Q92572,Q9GZM8,P32780,Q8TDD1,Q9UER7,Q709C8,Q96EB6,P41743,P42224,P42345,P78527,Q9BT40,O94874,P38398,Q9P253,Q13144,Q14232,P19338,Q92610,P04899,Q9Y5X3,Q8N8D1,O15111,P11142,P61353
4	GO:0036119	response to platelet-derived growth factor	Biological Process	1	Q92839
4	GO:0070849	response to epidermal growth factor	Biological Process	6	P19174,P19338,Q15648,Q9BT40,Q9UNH7,P27361
4	GO:0071495	cellular response to endogenous stimulus	Biological Process	38	Q15648,O00507,O15198,P04637,P29590,Q96EB6,P27361,Q92572,Q9GZM8,Q2Q1W2,P32780,P11021,Q09028,Q9UNH7,Q8TDD1,Q9UER7,P41743,P42224,P42345,P78527,Q9BT40,O94874,P38398,Q9P253,Q15910,Q92839,P19338,Q92610,P04899,Q9Y5X3,Q96EV8,Q92974,Q6IAA8,Q02880,P19174,P11142,Q96AY2,Q92558
4	GO:0071559	response to transforming growth factor beta	Biological Process	8	O00507,O15198,P04637,P29590,Q96EB6,P11021,Q09028,Q9UNH7
4	GO:0071772	response to BMP	Biological Process	3	O00507,O15198,P27361
4	GO:0071774	response to fibroblast growth factor	Biological Process	1	Q2Q1W2
4	GO:1990089	response to nerve growth factor	Biological Process	1	Q92558
4	GO:0001101	response to acid chemical	Biological Process	5	O15111,P42345,P42898,Q6IAA8,O94874
4	GO:0007584	response to nutrient	Biological Process	6	P42345,P42898,P35520,Q15648,P04899,P42224
4	GO:0009410	response to xenobiotic stimulus	Biological Process	12	Q9BQB6,P04637,Q9UMX1,O15067,O15111,P11387,P28288,P42224,P42898,P50416,Q01831,Q96K76
4	GO:0009636	response to toxic substance	Biological Process	2	Q12923,O15111
4	GO:0010033	response to organic substance	Biological Process	87	Q96DX7,Q15648,P11142,P17066,Q96CS3,O00507,O15198,P04637,P29590,Q96EB6,P04899,P27361,Q92572,Q9GZM8,Q2Q1W2,P15104,Q13144,Q14232,Q6SZW1,P32780,O15111,Q9BQB6,P28288,P50416,P11021,P27824,P46379,Q8IXB1,Q9H8Y5,Q09028,Q9UNH7,Q8TDD1,Q9UER7,P18847,P19525,Q9Y4P3,Q15910,Q96RT1,P40429,Q02952,Q709C8,P41743,P42224,P42345,P78527,Q9BT40,O94874,P38398,Q9P253,P42898,Q9H6S0,O95817,P62760,Q92839,Q9NXW2,P63151,Q9NR30,…
4	GO:0010035	response to inorganic substance	Biological Process	16	P67775,P42224,Q96EB6,Q8WZ42,Q9UJS0,Q02880,Q15910,Q9H8Y5,Q96PN6,O15111,P27361,Q9UER7,P49917,Q99707,Q96IZ0,P04637
4	GO:0046677	response to antibiotic	Biological Process	2	Q15910,P04637
4	GO:0046685	response to arsenic-containing substance	Biological Process	1	Q9UER7
4	GO:1901698	response to nitrogen compound	Biological Process	45	P04899,P27361,Q92572,Q9GZM8,Q9BQB6,P11021,P27824,P46379,Q8IXB1,Q96CS3,Q9H8Y5,Q96RT1,Q709C8,Q96EB6,P41743,P42224,P42345,P78527,Q9BT40,P42898,Q15910,Q9NXW2,O15111,P63151,P50416,Q9NR30,Q13144,Q14232,P19338,Q92610,Q9Y5X3,P35520,Q96EV8,P06748,Q92974,Q6IAA8,Q02880,O14730,P38398,Q99707,P04637,Q9UER7,O94874,Q8TCT9,Q9UNH7
4	GO:1901700	response to oxygen-containing compound	Biological Process	42	P04899,P27361,Q92572,Q9GZM8,P15104,Q13144,Q14232,Q6SZW1,O15111,Q15910,Q96RT1,P40429,Q02952,Q709C8,Q96EB6,P41743,P42224,P42345,P78527,Q9BT40,P42898,P62760,P50416,P19338,Q92610,Q9Y5X3,P35520,Q96EV8,Q02880,Q9H8Y5,Q15648,Q92974,Q6IAA8,Q96RR1,Q8NI77,P38398,Q99707,P04637,Q96IZ0,O94874,P61353,Q9UNH7
4	GO:1902074	response to salt	Biological Process	1	Q9UER7
4	GO:0014888	striated muscle adaptation	Biological Process	1	Q15910
4	GO:0014889	muscle atrophy	Biological Process	1	Q15813
4	GO:0000054	ribosomal subunit export from nucleus	Biological Process	2	O14980,P06748
4	GO:0031144	proteasome localization	Biological Process	1	Q96P70
4	GO:0099590	neurotransmitter receptor internalization	Biological Process	1	Q8NBU5
4	GO:0006403	RNA localization	Biological Process	21	O14980,Q6I9Y2,Q9BW27,P06748,O43592,P05455,Q8N1F7,Q16762,Q9H0U6,P67809,O00425,Q8NFH4,Q9NZI8,P17987,P50991,P78371,Q01780,P40227,P49368,P50990,Q99832
4	GO:0008104	protein localization	Biological Process	110	P29590,P62258,Q96RT1,Q9UID3,O15397,O60518,O95373,P04637,P52292,Q15648,Q8N1F7,Q96P70,Q9BW27,Q9UI26,Q9Y5L0,O14980,P38646,Q9UIA9,O60725,P41743,P09132,P37108,P49458,P46379,P49754,Q709C8,O43933,Q99797,O43592,O43747,O60749,P06748,Q13596,Q92572,Q92974,Q96L92,Q9P253,Q9UBF2,Q9UNH7,Q9Y5X3,P27824,Q9HCU5,O15498,P49407,P57737,Q08379,Q2M389,Q2VPB7,Q7Z3U7,Q8NFH4,Q8NI77,Q9P2E9,Q9UPQ3,Q9Y6D5,Q96CS3,P11021,O94874,…
4	GO:0010876	lipid localization	Biological Process	7	P50416,Q709C8,Q96EB6,P28288,Q9H2V7,O95573,Q9UID3
4	GO:0006810	transport	Biological Process	135	O14980,P06748,Q9H2H9,Q96EV8,P49407,Q9UL63,Q8NBU5,Q96PN6,Q8TD08,Q9HCU5,Q6I9Y2,Q9BW27,O43592,P05455,P29590,P62258,Q96RT1,Q9UID3,O15397,O60518,O95373,P04637,P52292,Q15648,Q8N1F7,Q96P70,Q9UI26,Q9Y5L0,P38646,Q9UIA9,O60725,P41743,P09132,P37108,P49458,P46379,P49754,Q709C8,O43933,Q99797,Q16795,P02792,P02794,Q9UJS0,P50416,P30825,Q15758,O43747,O60749,Q13596,Q92572,Q92974,Q96L92,Q9P253,Q9UBF2,Q9UNH7,Q9Y5X3,…
4	GO:0045184	establishment of protein localization	Biological Process	85	P29590,P62258,Q96RT1,Q9UID3,O15397,O60518,O95373,P04637,P52292,Q15648,Q8N1F7,Q96P70,Q9BW27,Q9UI26,Q9Y5L0,O14980,P38646,Q9UIA9,O60725,P41743,P09132,P37108,P49458,P46379,P49754,Q709C8,O43933,Q99797,O43592,O43747,O60749,P06748,Q13596,Q92572,Q92974,Q96L92,Q9P253,Q9UBF2,Q9UNH7,Q9Y5X3,P27824,Q9HCU5,O15498,P49407,P57737,Q08379,Q2M389,Q2VPB7,Q7Z3U7,Q8NFH4,Q8NI77,Q9P2E9,Q9UPQ3,Q9Y6D5,Q96CS3,P11021,Q8WWC4,…
4	GO:0051236	establishment of RNA localization	Biological Process	13	O14980,Q6I9Y2,Q9BW27,P06748,O43592,P05455,Q8N1F7,Q16762,Q9H0U6,P67809,O00425,Q8NFH4,Q9NZI8
4	GO:0051656	establishment of organelle localization	Biological Process	26	O14980,P06748,P42858,Q9GZM8,Q8TD08,Q9HCU5,O15498,Q14807,Q8NI77,Q9UJX2,Q9Y613,O43747,Q92572,O00160,Q8TDH9,Q9BXS6,Q66K74,O00743,P78537,Q96EV8,Q9NUP1,Q9P0L2,Q92845,Q9BQS8,Q9UBF2,Q96EB6
4	GO:0019915	lipid storage	Biological Process	2	P50416,Q96EB6
4	GO:0045185	maintenance of protein location	Biological Process	3	P11021,Q709C8,P29590
4	GO:0051238	sequestering of metal ion	Biological Process	2	P02792,P02794
4	GO:0001505	regulation of neurotransmitter levels	Biological Process	5	Q9H2H9,Q96EV8,Q15042,Q4J6C6,Q9P253
4	GO:0002027	regulation of heart rate	Biological Process	1	P62258
4	GO:0006450	regulation of translational fidelity	Biological Process	1	P49588
4	GO:0008217	regulation of blood pressure	Biological Process	1	Q9Y5X3
4	GO:0008360	regulation of cell shape	Biological Process	2	Q16181,Q9UL63
4	GO:0010522	regulation of calcium ion transport into cytosol	Biological Process	3	P42858,P19174,P29590
4	GO:0010817	regulation of hormone levels	Biological Process	4	Q15648,Q9UBM7,P62760,P50416
4	GO:0031647	regulation of protein stability	Biological Process	26	P42345,P42858,P78527,Q96EB6,O75569,O95817,P04637,P06748,P17987,P29590,P40227,P46379,P46777,P49368,P50613,P50990,P50991,P78371,Q562E7,Q93009,Q96DX7,Q99832,Q9BZE4,P11142,Q96RU2,Q9NVN8
4	GO:0042391	regulation of membrane potential	Biological Process	4	Q96PN6,P42345,Q15042,P62258
4	GO:0042592	homeostatic process	Biological Process	41	Q96EB6,P02792,P02794,P06748,P62753,Q9UI12,P29590,Q6P4Q7,O94874,P38646,Q15758,Q86XI2,P27361,P42858,Q8NDF8,P62847,Q9H2V7,P62760,Q15910,Q9BT40,Q9Y4D8,Q6IAA8,P30153,P67775,Q38SD2,P42224,P78527,Q15648,O95817,Q16531,Q15020,P19174,P62258,Q8WWC4,Q9NVX2,P78559,Q99576,Q96RR1,O43159,Q6IAN0,P40429
4	GO:0043114	regulation of vascular permeability	Biological Process	1	Q02952
4	GO:0043487	regulation of RNA stability	Biological Process	14	Q504Q3,Q5TAX3,Q9UIV1,Q9NZI8,Q9HCE1,Q9NP64,Q06265,P67809,Q6ZN17,Q86VM9,Q8NDF8,Q2Q1W2,O00425,P06748
4	GO:0048167	regulation of synaptic plasticity	Biological Process	3	Q15042,P78559,Q9H2H9
4	GO:0050803	regulation of synapse structure or activity	Biological Process	5	P07437,Q9NYB9,Q96EV8,P11142,Q12923
4	GO:0050878	regulation of body fluid levels	Biological Process	6	Q15648,Q96EV8,Q9BQB6,P04899,Q9BT40,Q9NUP1
4	GO:0060296	regulation of cilium beat frequency involved in ciliary motility	Biological Process	1	Q9UL16
4	GO:0061635	regulation of protein complex stability	Biological Process	1	P11142
4	GO:0090066	regulation of anatomical structure size	Biological Process	8	P06748,P42345,Q86VI3,Q96F07,Q9Y2A7,Q96PN6,P78537,P35520
4	GO:0090559	regulation of membrane permeability	Biological Process	2	P04637,P42345
4	GO:0099072	regulation of postsynaptic membrane neurotransmitter receptor levels	Biological Process	5	Q8NBU5,P41743,Q96L92,Q96RT1,Q9UNH7
4	GO:0099149	regulation of postsynaptic neurotransmitter receptor internalization	Biological Process	1	Q8NBU5
4	GO:0010469	regulation of signaling receptor activity	Biological Process	1	Q9UNH7
4	GO:0032409	regulation of transporter activity	Biological Process	2	P42858,P62258
4	GO:0043462	regulation of ATP-dependent activity	Biological Process	5	Q8IXB1,Q8WXX5,P20585,P04637,Q96EB6
4	GO:0044092	negative regulation of molecular function	Biological Process	22	Q9BT40,Q9UNH7,P04899,O15111,O94874,P49407,Q93009,Q96EB6,Q96RT1,Q08379,Q9NVN8,Q9BZE4,Q96K76,Q9UMX1,P06748,O95373,P04637,Q9NVH6,P29590,O75367,P62258,P46777
4	GO:0044093	positive regulation of molecular function	Biological Process	34	Q92688,Q9NZJ7,Q9UKL3,P40123,Q01518,P27361,P42858,P11171,P42345,Q8IXB1,Q8WXX5,Q96EB6,Q15910,Q14155,Q15042,Q9GZM8,Q9BUZ4,Q9UER7,O15111,P06748,P19525,P41743,Q92974,P20585,P15880,P17987,P50991,P78371,Q8TD08,P67775,Q86X10,Q96F07,P35250,P07305
4	GO:0050790	regulation of catalytic activity	Biological Process	42	P32780,P50613,Q9BZE4,Q9BT40,Q92688,Q9NZJ7,Q9UKL3,Q9UNH7,P40123,Q01518,P04899,P27361,P06748,Q96EB6,P42345,Q15042,Q8TC07,Q96K76,Q15910,Q14155,Q9GZM8,P42858,O95373,Q8WZ42,Q9BUZ4,Q9UER7,P20585,P04637,Q9NVH6,P15880,P17987,P50991,P78371,Q8TD08,P29590,Q9Y6K5,O75367,P67775,Q86X10,Q96F07,P35250,P46777
4	GO:0051090	regulation of DNA-binding transcription factor activity	Biological Process	11	O15111,O94874,P49407,Q93009,Q96EB6,Q96RT1,Q9UMX1,P06748,P19525,P41743,Q92974
4	GO:0051098	regulation of binding	Biological Process	7	Q08379,Q9NVN8,P11171,Q9BZE4,Q14155,P67775,P07305
4	GO:0034505	tooth mineralization	Biological Process	1	Q6P4Q7
5	GO:0007292	female gamete generation	Biological Process	7	Q96EB6,Q5TAX3,Q16531,P30153,Q9Y4F3,P62753,Q9H6S0
5	GO:0048232	male gamete generation	Biological Process	15	Q8NI77,O00507,P20226,P46379,Q16181,Q4G0J3,Q8IXK0,Q8NB90,Q96EB6,Q96PN6,Q96SI9,Q9H6S0,Q9UMX1,Q9Y2H6,Q96SB4
5	GO:0043029	T cell homeostasis	Biological Process	4	P62753,Q99576,P30153,P67775
5	GO:0002681	somatic recombination of T cell receptor gene segments	Biological Process	2	P49917,P78527
5	GO:0016447	somatic recombination of immunoglobulin gene segments	Biological Process	5	P49917,P78527,Q96QE3,O96028,P20585
5	GO:0033151	V(D)J recombination	Biological Process	3	P49917,P78527,Q9Y4B6
5	GO:0002208	somatic diversification of immunoglobulins involved in immune response	Biological Process	3	P49917,Q96QE3,O96028
5	GO:0038096	Fc-gamma receptor signaling pathway involved in phagocytosis	Biological Process	1	Q08722
5	GO:0002371	dendritic cell cytokine production	Biological Process	1	Q9NR30
5	GO:0002444	myeloid leukocyte mediated immunity	Biological Process	1	Q9NR30
5	GO:0002449	lymphocyte mediated immunity	Biological Process	5	P07437,O43747,P49917,Q96QE3,O96028
5	GO:0002703	regulation of leukocyte mediated immunity	Biological Process	4	Q9NR30,O43747,O96028,Q96QE3
5	GO:0002705	positive regulation of leukocyte mediated immunity	Biological Process	4	Q9NR30,O43747,O96028,Q96QE3
5	GO:0043300	regulation of leukocyte degranulation	Biological Process	1	O43747
5	GO:1905449	regulation of Fc-gamma receptor signaling pathway involved in phagocytosis	Biological Process	1	Q08722
5	GO:1905450	negative regulation of Fc-gamma receptor signaling pathway involved in phagocytosis	Biological Process	1	Q08722
5	GO:0043302	positive regulation of leukocyte degranulation	Biological Process	1	O43747
5	GO:0043320	natural killer cell degranulation	Biological Process	1	O43747
5	GO:0002429	immune response-activating cell surface receptor signaling pathway	Biological Process	6	P19174,Q13144,Q14232,Q96IZ0,Q08722,P46379
5	GO:0030218	erythrocyte differentiation	Biological Process	8	P38646,P42224,P78527,Q15648,P62753,O94874,Q15758,Q86XI2
5	GO:0002718	regulation of cytokine production involved in immune response	Biological Process	2	Q9NR30,Q96EB6
5	GO:0002720	positive regulation of cytokine production involved in immune response	Biological Process	2	Q9NR30,Q96EB6
5	GO:0061082	myeloid leukocyte cytokine production	Biological Process	2	Q9NR30,Q96EB6
5	GO:0002381	immunoglobulin production involved in immunoglobulin-mediated immune response	Biological Process	3	P49917,Q96QE3,O96028
5	GO:0002637	regulation of immunoglobulin production	Biological Process	2	O96028,Q96QE3
5	GO:0002639	positive regulation of immunoglobulin production	Biological Process	2	O96028,Q96QE3
5	GO:0030097	hemopoiesis	Biological Process	28	P04637,Q56NI9,P42345,P78527,P49917,P29590,Q02880,Q15910,Q9Y4B6,O94874,P38646,Q15758,Q86XI2,Q6IAN0,Q15648,Q96EB6,O94887,P62753,Q38SD2,Q86U86,Q9BXW9,Q96QR8,P42224,P35268,O95376,Q15020,P19525,P52952
5	GO:0048536	spleen development	Biological Process	1	P52952
5	GO:0048538	thymus development	Biological Process	1	P27361
5	GO:0048539	bone marrow development	Biological Process	1	P04637
5	GO:0002688	regulation of leukocyte chemotaxis	Biological Process	1	P27361
5	GO:0002691	regulation of cellular extravasation	Biological Process	1	Q08722
5	GO:0071675	regulation of mononuclear cell migration	Biological Process	2	P27361,Q08722
5	GO:1905521	regulation of macrophage migration	Biological Process	1	P27361
5	GO:0051249	regulation of lymphocyte activation	Biological Process	10	Q96IZ0,Q96QE3,P42345,P30825,O43747,Q86U86,Q9BXW9,P78527,O96028,Q08722
5	GO:0002819	regulation of adaptive immune response	Biological Process	3	Q96EB6,O96028,Q96QE3
5	GO:0002861	regulation of inflammatory response to antigenic stimulus	Biological Process	1	P19174
5	GO:0045088	regulation of innate immune response	Biological Process	9	P78527,O43747,O14730,Q9H1D9,Q9NW08,O00743,Q15648,Q9UIV1,Q9Y6K5
5	GO:0050854	regulation of antigen receptor-mediated signaling pathway	Biological Process	1	Q96IZ0
5	GO:0060368	regulation of Fc receptor mediated stimulatory signaling pathway	Biological Process	1	Q08722
5	GO:0062207	regulation of pattern recognition receptor signaling pathway	Biological Process	4	Q6SZW1,O14730,Q96RT1,Q7Z2W4
5	GO:0045637	regulation of myeloid cell differentiation	Biological Process	6	P38646,P42224,P78527,Q15648,P42345,Q96QR8
5	GO:1902105	regulation of leukocyte differentiation	Biological Process	4	Q86U86,Q9BXW9,P78527,P42345
5	GO:0051250	negative regulation of lymphocyte activation	Biological Process	1	Q96IZ0
5	GO:0002862	negative regulation of inflammatory response to antigenic stimulus	Biological Process	1	P19174
5	GO:0045824	negative regulation of innate immune response	Biological Process	4	Q9UIV1,Q9Y6K5,O00743,P78527
5	GO:0050860	negative regulation of T cell receptor signaling pathway	Biological Process	1	Q96IZ0
5	GO:0002690	positive regulation of leukocyte chemotaxis	Biological Process	1	P27361
5	GO:0002693	positive regulation of cellular extravasation	Biological Process	1	Q08722
5	GO:0071677	positive regulation of mononuclear cell migration	Biological Process	1	Q08722
5	GO:1905523	positive regulation of macrophage migration	Biological Process	1	P27361
5	GO:0051251	positive regulation of lymphocyte activation	Biological Process	8	Q96QE3,P42345,P30825,O43747,Q86U86,P78527,O96028,Q08722
5	GO:0002821	positive regulation of adaptive immune response	Biological Process	3	O96028,Q96QE3,Q96EB6
5	GO:0045089	positive regulation of innate immune response	Biological Process	6	P78527,O43747,Q15648,O14730,Q9H1D9,Q9NW08
5	GO:1902107	positive regulation of leukocyte differentiation	Biological Process	2	Q86U86,P78527
5	GO:0002460	adaptive immune response based on somatic recombination of immune receptors built from immunoglobulin superfamily domains	Biological Process	4	P42345,P49917,Q96QE3,O96028
5	GO:0002228	natural killer cell mediated immunity	Biological Process	2	P07437,O43747
5	GO:0034340	response to type I interferon	Biological Process	3	P42224,Q9UIV1,Q9Y6K5
5	GO:0034341	response to interferon-gamma	Biological Process	5	P04637,P42224,Q15648,P40429,Q08722
5	GO:0140374	antiviral innate immune response	Biological Process	1	P19525
5	GO:0046968	peptide antigen transport	Biological Process	1	Q9H2X3
5	GO:0043369	CD4-positive or CD8-positive, alpha-beta T cell lineage commitment	Biological Process	1	P42345
5	GO:0002285	lymphocyte activation involved in immune response	Biological Process	7	P42345,P04637,P62753,O43747,P49917,Q96QE3,O96028
5	GO:0001767	establishment of lymphocyte polarity	Biological Process	1	Q96L92
5	GO:0030098	lymphocyte differentiation	Biological Process	11	P42345,P04637,P78527,Q02880,Q15910,Q9Y4B6,P49917,P62753,Q86U86,Q9BXW9,P35268
5	GO:0030101	natural killer cell activation	Biological Process	3	Q96L92,O43747,P46379
5	GO:0042110	T cell activation	Biological Process	11	P42345,P04637,P62753,P78527,P49917,P30825,Q96IZ0,Q86U86,Q9BXW9,P35268,Q08722
5	GO:0042113	B cell activation	Biological Process	9	P04637,P78527,Q02880,Q15910,Q9Y4B6,Q96IZ0,Q96QE3,P49917,O96028
5	GO:0046651	lymphocyte proliferation	Biological Process	5	P04637,P62753,Q96IZ0,Q96QE3,P30825
5	GO:0048246	macrophage chemotaxis	Biological Process	3	P27361,P40429,Q9BW27
5	GO:0071621	granulocyte chemotaxis	Biological Process	1	P27361
5	GO:0035696	monocyte extravasation	Biological Process	1	Q08722
5	GO:0097530	granulocyte migration	Biological Process	1	P27361
5	GO:1905517	macrophage migration	Biological Process	3	P27361,P40429,Q9BW27
5	GO:0008306	associative learning	Biological Process	1	P78559
5	GO:0098597	observational learning	Biological Process	1	P42858
5	GO:0042297	vocal learning	Biological Process	1	P42858
5	GO:0006127	glycerophosphate shuttle	Biological Process	1	P43304
5	GO:1904023	regulation of glucose catabolic process to lactate via pyruvate	Biological Process	1	P04637
5	GO:1904024	negative regulation of glucose catabolic process to lactate via pyruvate	Biological Process	1	P04637
5	GO:0006098	pentose-phosphate shunt	Biological Process	2	P04637,P42345
5	GO:0043456	regulation of pentose-phosphate shunt	Biological Process	2	P04637,P42345
5	GO:0006577	amino-acid betaine metabolic process	Biological Process	3	P50416,P11310,Q9NVH6
5	GO:0009439	cyanate metabolic process	Biological Process	1	Q16762
5	GO:0043603	cellular amide metabolic process	Biological Process	110	Q504Q3,Q5TAX3,Q9UIV1,P05386,P05387,P05388,P15880,P18077,P18124,P18621,P26373,P27635,P30050,P35268,P36578,P39023,P40429,P42766,P46776,P46777,P46778,P46779,P46781,P47914,P49207,P50914,P61247,P61254,P61353,P61927,P62241,P62266,P62280,P62424,P62750,P62753,P62847,P62888,P62899,P62906,P62910,P62917,P83731,P83881,P84098,Q02543,Q02878,Q07020,Q9UNX3,Q9Y3U8,A8K7N0,F8W7C6,O00425,O43324,P19525,P82912,P82914,…
5	GO:0044270	cellular nitrogen compound catabolic process	Biological Process	22	Q01780,Q504Q3,Q5TAX3,Q9UIV1,Q06265,Q16762,Q9NRW3,Q6ZN17,Q8NDF8,Q9NZI8,Q6SZW1,Q9HCE1,Q9NP64,P67809,Q86VM9,Q7Z2W4,Q2Q1W2,O00425,P05455,Q9HAN9,P06748,A7E2V4
5	GO:0044271	cellular nitrogen compound biosynthetic process	Biological Process	244	Q07002,O75367,O96028,P04637,P16403,P18847,P27635,P35251,P42224,P49711,P52952,Q09028,Q15022,Q15648,Q15910,Q32MZ4,Q4G0J3,Q7L2J0,Q8TF47,Q96EB6,Q96IZ0,Q96T58,Q9BQ70,Q9UDR5,Q9UMX1,Q9Y3T9,Q9Y4B6,Q9Y6Q3,Q504Q3,Q5TAX3,Q9UIV1,Q15054,Q53T94,Q9UIF9,P05386,P05387,P05388,P15880,P18077,P18124,P18621,P26373,P30050,P35268,P36578,P39023,P40429,P42766,P46776,P46777,P46778,P46779,P46781,P47914,P49207,P50914,P61247,…
5	GO:0072521	purine-containing compound metabolic process	Biological Process	10	O15067,Q96PN6,Q9UJS0,Q9HCC0,Q9UDR5,O95573,Q16795,P42345,O60725,P67775
5	GO:0072524	pyridine-containing compound metabolic process	Biological Process	3	Q6IA69,Q9HAN9,Q6SZW1
5	GO:0072527	pyrimidine-containing compound metabolic process	Biological Process	2	P42345,Q9NRW3
5	GO:0019219	regulation of nucleobase-containing compound metabolic process	Biological Process	153	P52292,Q07002,O75367,O96028,P04637,P16403,P18847,P27635,P35251,P42224,P49711,P52952,Q09028,Q15022,Q15648,Q15910,Q32MZ4,Q4G0J3,Q7L2J0,Q8TF47,Q96EB6,Q96IZ0,Q96T58,Q9BQ70,Q9UDR5,Q9UMX1,Q9Y3T9,Q9Y4B6,Q9Y6Q3,Q504Q3,Q5TAX3,Q9UIV1,O60264,P30153,P67775,Q56NI9,Q9NRL2,P38398,P49848,Q9NXR7,O95625,P28370,P29590,P67809,Q02878,Q969X6,Q99551,Q9BQG0,Q9UER7,Q9UIF9,Q9Y483,O15198,O60216,P35659,P49407,P51814,Q15776,…
5	GO:0034248	regulation of cellular amide metabolic process	Biological Process	33	Q504Q3,Q5TAX3,Q9UIV1,P27635,Q13428,Q96EY7,O60841,O00425,P19338,P19525,P40429,P67809,Q2Q1W2,Q9NZI8,P29590,Q9HCE1,Q06265,P05455,P06748,P42345,P46777,P61254,P78527,Q8NE71,Q96P11,Q9H0A0,Q9H5U6,P49458,Q13144,Q8NDF8,Q92552,P49588,P04637
5	GO:0051246	regulation of protein metabolic process	Biological Process	98	P32780,P50613,Q9BZE4,Q504Q3,Q5TAX3,Q9UIV1,P67775,P78527,Q12923,Q8IXB1,Q9BT40,P27361,P49407,Q86VI3,Q96EB6,Q96EV8,Q9UER7,P27635,Q13428,Q96EY7,O60841,Q92688,Q9NZJ7,Q9UKL3,Q9UNH7,Q96PN6,Q14738,O00425,P19338,P19525,P40429,P67809,Q2Q1W2,Q9NZI8,Q15843,O60264,Q9UIF9,O43159,P29590,O94874,Q9NVN8,P06748,P11021,P38398,O14980,P10398,P46379,P78559,Q93009,O95376,Q15370,Q9Y4X5,P42345,Q13610,Q9BVP2,P35659,Q9BQG0,…
5	GO:0080164	regulation of nitric oxide metabolic process	Biological Process	1	Q08722
5	GO:0150172	regulation of phosphatidylcholine metabolic process	Biological Process	1	O95573
5	GO:0034249	negative regulation of cellular amide metabolic process	Biological Process	15	Q504Q3,Q5TAX3,Q9UIV1,O00425,P19338,P19525,P40429,P67809,Q2Q1W2,Q9NZI8,P29590,Q9HCE1,Q06265,P49458,Q8NDF8
5	GO:0045934	negative regulation of nucleobase-containing compound metabolic process	Biological Process	62	O75367,O96028,P04637,P16403,P18847,P27635,P35251,P42224,P49711,P52952,Q09028,Q15022,Q15648,Q15910,Q32MZ4,Q4G0J3,Q7L2J0,Q8TF47,Q96EB6,Q96IZ0,Q96T58,Q9BQ70,Q9UDR5,Q9UMX1,Q9Y3T9,Q9Y4B6,Q9Y6Q3,Q9BZE4,O60264,Q9NR30,Q9UIF9,P29590,Q01780,Q8NDF8,Q9H0A0,Q9NVN8,Q9NP64,O43159,P11142,P38398,Q06587,Q8IXK0,Q96K76,Q9BQG0,Q9BT40,Q9HAN9,Q9UBW7,Q9UER7,Q9UIV1,Q9ULD5,Q9UNH7,P07305,P20585,Q92522,P06748,Q12872,P67809,…
5	GO:0051248	negative regulation of protein metabolic process	Biological Process	43	Q504Q3,Q5TAX3,Q9UIV1,P78527,Q12923,Q8IXB1,Q9BT40,Q9UNH7,Q14738,O00425,P19338,P19525,P40429,P67809,Q2Q1W2,Q9NZI8,O94874,P49407,Q9BZE4,Q9NVN8,P46379,P78559,Q93009,P29590,Q13610,P38398,Q9HCE1,P30153,P67775,Q96K76,Q06265,P06748,O95373,P04637,P49458,Q38SD2,Q8NDF8,Q96DX7,O75367,Q96EB6,P62258,P46777,Q9UMX1
5	GO:0034250	positive regulation of cellular amide metabolic process	Biological Process	15	P05455,P06748,P42345,P46777,P61254,P78527,Q8NE71,Q96P11,Q9H0A0,Q9H5U6,Q13144,Q8NDF8,Q92552,P67809,Q9NZI8
5	GO:0045935	positive regulation of nucleobase-containing compound metabolic process	Biological Process	85	Q504Q3,Q5TAX3,Q9UIV1,P29590,Q9BVP2,P17987,P27361,P40227,P49368,P50990,P50991,P78371,Q8TD08,Q99832,Q15648,Q9NPJ6,Q8WVV9,Q9HCE1,P04637,Q06265,P38398,Q96EB6,Q9NXR7,O60264,Q96QE3,Q9NRL2,P42345,O15111,P06748,P28370,P32780,P35251,P42224,P49711,P49848,P52952,Q01831,Q09028,Q5TA31,Q68DK7,Q8TF47,Q96DX7,Q9BT40,Q9BW27,Q9Y5X3,P17480,P35659,Q8TED0,Q9BQG0,Q9H583,Q9NR30,O75475,P18847,P19338,P49407,P50613,P67809,…
5	GO:0051247	positive regulation of protein metabolic process	Biological Process	55	P27361,P49407,Q86VI3,Q96EB6,Q96EV8,Q9UER7,Q92688,Q9NZJ7,Q9UKL3,Q96PN6,O60264,Q9UIF9,O43159,P29590,P06748,P11021,P38398,O95376,Q15370,Q9Y4X5,P42345,P10398,Q9BVP2,P35659,Q9BQG0,Q9NR30,Q14738,Q96IZ0,Q15910,P05455,P46777,P61254,P78527,Q8NE71,Q96P11,Q9H0A0,Q9H5U6,Q16531,Q9Y4B6,Q9BUZ4,Q96F07,Q13144,P04637,Q38SD2,Q92974,Q9UKS6,P15880,Q08379,Q8NDF8,Q92552,P67775,P67809,Q9NZI8,Q15042,P46379
5	GO:0150173	positive regulation of phosphatidylcholine metabolic process	Biological Process	1	O95573
5	GO:0000096	sulfur amino acid metabolic process	Biological Process	4	Q16762,P35520,P42898,Q99707
5	GO:0006022	aminoglycan metabolic process	Biological Process	1	Q92839
5	GO:0006518	peptide metabolic process	Biological Process	104	Q504Q3,Q5TAX3,Q9UIV1,P05386,P05387,P05388,P15880,P18077,P18124,P18621,P26373,P27635,P30050,P35268,P36578,P39023,P40429,P42766,P46776,P46777,P46778,P46779,P46781,P47914,P49207,P50914,P61247,P61254,P61353,P61927,P62241,P62266,P62280,P62424,P62750,P62753,P62847,P62888,P62899,P62906,P62910,P62917,P83731,P83881,P84098,Q02543,Q02878,Q07020,Q9UNX3,Q9Y3U8,A8K7N0,F8W7C6,O00425,O43324,P19525,P82912,P82914,…
5	GO:0006665	sphingolipid metabolic process	Biological Process	3	P30153,P67775,P78368
5	GO:0009112	nucleobase metabolic process	Biological Process	1	P42345
5	GO:0009116	nucleoside metabolic process	Biological Process	2	Q9NRW3,O60725
5	GO:0033013	tetrapyrrole metabolic process	Biological Process	1	Q99707
5	GO:0042558	pteridine-containing compound metabolic process	Biological Process	2	P42898,Q99707
5	GO:0046470	phosphatidylcholine metabolic process	Biological Process	3	Q6IAN0,O95573,Q8IY17
5	GO:1901565	organonitrogen compound catabolic process	Biological Process	58	Q16762,A8K9U1,O95376,P46379,P49407,P62256,Q13564,Q15843,Q16531,Q562E7,Q9UJX2,Q9Y4X5,Q9H8Y5,O60502,P15104,Q9HCC0,Q9UDR5,P35520,Q9Y5X3,Q9NRW3,Q9UMS4,Q6SZW1,P42345,P11021,P27824,Q8IXB1,Q96CS3,Q13042,Q9UJX3,Q9UJX4,Q9UJX5,Q13617,O14980,O94874,P10398,P78559,Q93009,Q15370,Q9NXW2,A7E2V4,O94888,P29590,Q13362,Q16186,Q2Q1W2,Q5TA31,Q96EB6,Q9BUZ4,Q9Y4B6,Q9UKS6,P61289,O95817,P11142,Q96RU2,O60524,Q8TCT9,P46777,…
5	GO:1901566	organonitrogen compound biosynthetic process	Biological Process	128	Q504Q3,Q5TAX3,Q9UIV1,P05386,P05387,P05388,P15880,P18077,P18124,P18621,P26373,P27635,P30050,P35268,P36578,P39023,P40429,P42766,P46776,P46777,P46778,P46779,P46781,P47914,P49207,P50914,P61247,P61254,P61353,P61927,P62241,P62266,P62280,P62424,P62750,P62753,P62847,P62888,P62899,P62906,P62910,P62917,P83731,P83881,P84098,Q02543,Q02878,Q07020,Q9UNX3,Q9Y3U8,Q92839,O15067,Q96PN6,P42345,A8K7N0,F8W7C6,O00425,…
5	GO:0046209	nitric oxide metabolic process	Biological Process	1	Q08722
5	GO:0031329	regulation of cellular catabolic process	Biological Process	47	Q504Q3,Q5TAX3,Q9UIV1,Q8TD08,P42345,Q08379,O94874,Q9NZI8,Q96EB6,Q9UI12,Q9UNH7,Q9Y5X3,P50416,O14980,P10398,P46379,P78559,Q93009,O95376,Q15370,Q9Y4X5,Q9HCE1,Q9NP64,Q06265,Q96PN6,P67809,Q6ZN17,Q86VM9,Q9UKS6,Q8NDF8,Q7Z2W4,P61289,Q2Q1W2,O00425,Q9BQS8,P04637,Q9HAN9,P06748,P42858,P27361,Q709C8,O95817,P29590,P46777,Q9UMX1,A7E2V4,Q15042
5	GO:0042176	regulation of protein catabolic process	Biological Process	16	O14980,O94874,P10398,P46379,P78559,Q93009,O95376,Q15370,Q9Y4X5,Q16531,Q9Y4B6,Q9UKS6,P61289,P29590,P46777,Q9UMX1
5	GO:0043470	regulation of carbohydrate catabolic process	Biological Process	4	Q96PN6,P42345,P04637,P67775
5	GO:0050994	regulation of lipid catabolic process	Biological Process	1	P50416
5	GO:0031330	negative regulation of cellular catabolic process	Biological Process	15	P42345,Q08379,P46379,P78559,Q93009,Q9NP64,P67809,Q8NDF8,O00425,Q9NZI8,P04637,Q9HAN9,P29590,P46777,Q9UMX1
5	GO:0042177	negative regulation of protein catabolic process	Biological Process	6	P46379,P78559,Q93009,P29590,P46777,Q9UMX1
5	GO:0045820	negative regulation of glycolytic process	Biological Process	1	P67775
5	GO:0031331	positive regulation of cellular catabolic process	Biological Process	28	Q504Q3,Q5TAX3,Q9UIV1,O94874,Q96EB6,P50416,O95376,Q15370,Q9Y4X5,Q9HCE1,Q06265,Q96PN6,P42345,Q6ZN17,Q86VM9,Q9UKS6,Q8NDF8,Q7Z2W4,Q2Q1W2,P67809,Q9NZI8,Q9BQS8,P42858,P46379,P27361,O95817,A7E2V4,Q15042
5	GO:0045732	positive regulation of protein catabolic process	Biological Process	7	O95376,Q15370,Q9Y4X5,Q9UKS6,P46379,Q16531,Q9Y4B6
5	GO:0050996	positive regulation of lipid catabolic process	Biological Process	1	P50416
5	GO:0016054	organic acid catabolic process	Biological Process	8	Q16762,P15104,Q9HCC0,Q9UDR5,P35520,P11310,P28288,P50416
5	GO:0019439	aromatic compound catabolic process	Biological Process	21	Q01780,Q504Q3,Q5TAX3,Q9UIV1,Q06265,Q9NRW3,Q6ZN17,Q8NDF8,Q9NZI8,Q6SZW1,Q9HCE1,Q9NP64,P67809,Q86VM9,Q7Z2W4,Q2Q1W2,O00425,P05455,Q9HAN9,P06748,A7E2V4
5	GO:0044242	cellular lipid catabolic process	Biological Process	5	P11310,P28288,P50416,P19174,Q8IY17
5	GO:0044265	cellular macromolecule catabolic process	Biological Process	63	Q01780,Q504Q3,Q5TAX3,Q9UIV1,Q06265,A8K9U1,O95376,P46379,P49407,P62256,Q13564,Q15843,Q16531,Q562E7,Q9UJX2,Q9Y4X5,Q9H8Y5,O60502,Q9Y5X3,Q9UMS4,Q6ZN17,Q8NDF8,Q9NZI8,P11021,P27824,Q8IXB1,Q96CS3,Q13042,Q9UJX3,Q9UJX4,Q9UJX5,Q13617,O14980,O94874,P10398,P78559,Q93009,Q15370,Q9HCE1,Q9NXW2,A7E2V4,O94888,P29590,Q13362,Q16186,Q2Q1W2,Q5TA31,Q96EB6,Q9BUZ4,Q9NP64,P67809,Q86VM9,Q7Z2W4,P61289,O00425,P05455,Q96RU2,…
5	GO:0044273	sulfur compound catabolic process	Biological Process	2	Q16762,P35520
5	GO:0044275	cellular carbohydrate catabolic process	Biological Process	4	P43304,Q96PN6,P04637,P42345
5	GO:0046700	heterocycle catabolic process	Biological Process	21	Q01780,Q504Q3,Q5TAX3,Q9UIV1,Q06265,Q9NRW3,Q6ZN17,Q8NDF8,Q9NZI8,Q6SZW1,Q9HCE1,Q9NP64,P67809,Q86VM9,Q7Z2W4,Q2Q1W2,O00425,P05455,Q9HAN9,P06748,A7E2V4
5	GO:0034656	nucleobase-containing small molecule catabolic process	Biological Process	1	Q9NRW3
5	GO:0046164	alcohol catabolic process	Biological Process	1	P43304
5	GO:0046365	monosaccharide catabolic process	Biological Process	2	Q96PN6,P04637
5	GO:0009057	macromolecule catabolic process	Biological Process	69	Q01780,Q504Q3,Q5TAX3,Q9UIV1,Q06265,A8K9U1,O95376,P46379,P49407,P62256,Q13564,Q15843,Q16531,Q562E7,Q9UJX2,Q9Y4X5,Q9H8Y5,O60502,Q9Y5X3,Q9UMS4,Q6ZN17,Q8NDF8,Q9NZI8,P42345,P11021,P27824,Q8IXB1,Q96CS3,Q13042,Q9UJX3,Q9UJX4,Q9UJX5,Q13617,O14980,O94874,P10398,P78559,Q93009,Q15370,Q9HCE1,Q9NXW2,A7E2V4,O94888,P29590,Q13362,Q16186,Q2Q1W2,Q5TA31,Q96EB6,Q9BUZ4,Q9NP64,Q9Y4B6,Q96PN6,P67809,Q86VM9,Q9UKS6,Q7Z2W4,…
5	GO:0016042	lipid catabolic process	Biological Process	5	P11310,P28288,P50416,P19174,Q8IY17
5	GO:0016052	carbohydrate catabolic process	Biological Process	5	Q96PN6,P43304,P04637,P42345,P67775
5	GO:0046434	organophosphate catabolic process	Biological Process	3	P19174,Q6SZW1,Q8IY17
5	GO:1901136	carbohydrate derivative catabolic process	Biological Process	2	O60502,Q9NRW3
5	GO:1901361	organic cyclic compound catabolic process	Biological Process	21	Q01780,Q504Q3,Q5TAX3,Q9UIV1,Q06265,Q9NRW3,Q6ZN17,Q8NDF8,Q9NZI8,Q6SZW1,Q9HCE1,Q9NP64,P67809,Q86VM9,Q7Z2W4,Q2Q1W2,O00425,P05455,Q9HAN9,P06748,A7E2V4
5	GO:1901616	organic hydroxy compound catabolic process	Biological Process	1	P43304
5	GO:0010556	regulation of macromolecule biosynthetic process	Biological Process	145	Q07002,O75367,O96028,P04637,P16403,P18847,P27635,P35251,P42224,P49711,P52952,Q09028,Q15022,Q15648,Q15910,Q32MZ4,Q4G0J3,Q7L2J0,Q8TF47,Q96EB6,Q96IZ0,Q96T58,Q9BQ70,Q9UDR5,Q9UMX1,Q9Y3T9,Q9Y4B6,Q9Y6Q3,Q504Q3,Q5TAX3,Q9UIV1,Q9BT40,O60264,O95625,P28370,P29590,P30153,P67775,P67809,Q02878,Q969X6,Q99551,Q9BQG0,Q9NRL2,Q9UER7,Q9UIF9,Q9Y483,O15198,O60216,P35659,P38398,P49407,P49848,P51814,Q15776,Q15843,Q3KP31,…
5	GO:0031326	regulation of cellular biosynthetic process	Biological Process	148	Q07002,O75367,O96028,P04637,P16403,P18847,P27635,P35251,P42224,P49711,P52952,Q09028,Q15022,Q15648,Q15910,Q32MZ4,Q4G0J3,Q7L2J0,Q8TF47,Q96EB6,Q96IZ0,Q96T58,Q9BQ70,Q9UDR5,Q9UMX1,Q9Y3T9,Q9Y4B6,Q9Y6Q3,Q504Q3,Q5TAX3,Q9UIV1,Q9BT40,O60264,O95625,P28370,P29590,P30153,P67775,P67809,Q02878,Q969X6,Q99551,Q9BQG0,Q9NRL2,Q9UER7,Q9UIF9,Q9Y483,O15198,O60216,P35659,P38398,P49407,P49848,P51814,Q15776,Q15843,Q3KP31,…
5	GO:0043255	regulation of carbohydrate biosynthetic process	Biological Process	5	Q9BT40,P11310,Q93009,Q16531,Q96EB6
5	GO:0046890	regulation of lipid biosynthetic process	Biological Process	4	Q96EB6,P38398,P42345,O95573
5	GO:1903426	regulation of reactive oxygen species biosynthetic process	Biological Process	1	Q96PN6
5	GO:0010558	negative regulation of macromolecule biosynthetic process	Biological Process	62	O75367,O96028,P04637,P16403,P18847,P27635,P35251,P42224,P49711,P52952,Q09028,Q15022,Q15648,Q15910,Q32MZ4,Q4G0J3,Q7L2J0,Q8TF47,Q96EB6,Q96IZ0,Q96T58,Q9BQ70,Q9UDR5,Q9UMX1,Q9Y3T9,Q9Y4B6,Q9Y6Q3,Q504Q3,Q5TAX3,Q9UIV1,O60264,Q9NR30,Q9UIF9,O00425,P19338,P19525,P40429,P67809,Q2Q1W2,Q9NZI8,P29590,Q01780,Q8NDF8,Q9H0A0,Q9NVN8,Q9HCE1,Q06265,Q9BT40,O43159,P11142,P38398,Q06587,Q8IXK0,Q96K76,Q9BQG0,Q9HAN9,Q9UBW7,…
5	GO:0031327	negative regulation of cellular biosynthetic process	Biological Process	63	O75367,O96028,P04637,P16403,P18847,P27635,P35251,P42224,P49711,P52952,Q09028,Q15022,Q15648,Q15910,Q32MZ4,Q4G0J3,Q7L2J0,Q8TF47,Q96EB6,Q96IZ0,Q96T58,Q9BQ70,Q9UDR5,Q9UMX1,Q9Y3T9,Q9Y4B6,Q9Y6Q3,Q504Q3,Q5TAX3,Q9UIV1,O60264,Q9NR30,Q9UIF9,O00425,P19338,P19525,P40429,P67809,Q2Q1W2,Q9NZI8,P29590,Q01780,Q8NDF8,Q9H0A0,Q9NVN8,Q9HCE1,Q06265,P38398,Q9BT40,Q93009,O43159,P11142,Q06587,Q8IXK0,Q96K76,Q9BQG0,Q9HAN9,…
5	GO:0051055	negative regulation of lipid biosynthetic process	Biological Process	2	Q96EB6,P38398
5	GO:1903427	negative regulation of reactive oxygen species biosynthetic process	Biological Process	1	Q96PN6
5	GO:0010557	positive regulation of macromolecule biosynthetic process	Biological Process	76	P17987,P27361,P40227,P49368,P50990,P50991,P78371,Q8TD08,Q99832,Q15648,Q9NPJ6,P04637,Q96IZ0,Q96EB6,P05455,P06748,P42345,P46777,P61254,P78527,Q8NE71,Q96P11,Q9H0A0,Q9H5U6,O15111,P28370,P32780,P35251,P38398,P42224,P49711,P49848,P52952,Q01831,Q09028,Q5TA31,Q68DK7,Q8TF47,Q96DX7,Q9BT40,Q9BW27,Q9Y5X3,O60264,P17480,P35659,Q8TED0,Q9BQG0,Q9H583,Q9NR30,O75475,P18847,P19338,P49407,P50613,P67809,Q06265,Q92974,…
5	GO:0031328	positive regulation of cellular biosynthetic process	Biological Process	79	P17987,P27361,P40227,P49368,P50990,P50991,P78371,Q8TD08,Q99832,Q15648,Q9NPJ6,P04637,Q96IZ0,Q16531,Q96EB6,P05455,P06748,P42345,P46777,P61254,P78527,Q8NE71,Q96P11,Q9H0A0,Q9H5U6,O15111,P28370,P32780,P35251,P38398,P42224,P49711,P49848,P52952,Q01831,Q09028,Q5TA31,Q68DK7,Q8TF47,Q96DX7,Q9BT40,Q9BW27,Q9Y5X3,O60264,P17480,P35659,Q8TED0,Q9BQG0,Q9H583,Q9NR30,O75475,P18847,P19338,P49407,P50613,P67809,Q06265,…
5	GO:0046889	positive regulation of lipid biosynthetic process	Biological Process	2	O95573,P42345
5	GO:1903428	positive regulation of reactive oxygen species biosynthetic process	Biological Process	1	Q96PN6
5	GO:0120178	steroid hormone biosynthetic process	Biological Process	2	Q15648,Q9UBM7
5	GO:0006702	androgen biosynthetic process	Biological Process	1	Q15648
5	GO:0008654	phospholipid biosynthetic process	Biological Process	4	Q6IAN0,Q9BT40,O95573,Q9NPH2
5	GO:0016053	organic acid biosynthetic process	Biological Process	10	P08243,P35520,P15104,P28288,P38398,P42898,Q99707,Q9H2H9,Q9UDR5,Q96EB6
5	GO:0018130	heterocycle biosynthetic process	Biological Process	153	Q07002,O75367,O96028,P04637,P16403,P18847,P27635,P35251,P42224,P49711,P52952,Q09028,Q15022,Q15648,Q15910,Q32MZ4,Q4G0J3,Q7L2J0,Q8TF47,Q96EB6,Q96IZ0,Q96T58,Q9BQ70,Q9UDR5,Q9UMX1,Q9Y3T9,Q9Y4B6,Q9Y6Q3,Q15054,Q53T94,Q9UIF9,Q06210,O15067,Q96PN6,P42345,P27361,Q13610,Q4G0F4,O60264,P20226,P49848,Q99551,O95625,P28370,P29590,P30153,P67775,P67809,Q02878,Q969X6,Q9BQG0,Q9NRL2,Q9UER7,Q9Y483,O15198,O60216,P35659,…
5	GO:0019438	aromatic compound biosynthetic process	Biological Process	153	Q07002,O75367,O96028,P04637,P16403,P18847,P27635,P35251,P42224,P49711,P52952,Q09028,Q15022,Q15648,Q15910,Q32MZ4,Q4G0J3,Q7L2J0,Q8TF47,Q96EB6,Q96IZ0,Q96T58,Q9BQ70,Q9UDR5,Q9UMX1,Q9Y3T9,Q9Y4B6,Q9Y6Q3,Q15054,Q53T94,Q9UIF9,Q06210,O15067,Q96PN6,P27361,Q13610,Q4G0F4,O60264,P20226,P49848,Q99551,O95625,P28370,P29590,P30153,P67775,P67809,Q02878,Q969X6,Q9BQG0,Q9NRL2,Q9UER7,Q9Y483,O15198,O60216,P35659,P38398,…
5	GO:0034637	cellular carbohydrate biosynthetic process	Biological Process	4	P11310,Q9BT40,Q9NPH2,Q92839
5	GO:0034645	cellular macromolecule biosynthetic process	Biological Process	113	Q504Q3,Q5TAX3,Q9UIV1,P05386,P05387,P05388,P15880,P18077,P18124,P18621,P26373,P27635,P30050,P35268,P36578,P39023,P40429,P42766,P46776,P46777,P46778,P46779,P46781,P47914,P49207,P50914,P61247,P61254,P61353,P61927,P62241,P62266,P62280,P62424,P62750,P62753,P62847,P62888,P62899,P62906,P62910,P62917,P83731,P83881,P84098,Q02543,Q02878,Q07020,Q9UNX3,Q9Y3U8,P11310,Q9BT40,A8K7N0,F8W7C6,O00425,O43324,P19525,…
5	GO:0042181	ketone biosynthetic process	Biological Process	1	Q16795
5	GO:0044272	sulfur compound biosynthetic process	Biological Process	4	P35520,P42898,Q99707,O95573
5	GO:0045017	glycerolipid biosynthetic process	Biological Process	4	Q6IAN0,Q9BT40,Q96EB6,O95573
5	GO:0046460	neutral lipid biosynthetic process	Biological Process	1	Q96EB6
5	GO:0046467	membrane lipid biosynthetic process	Biological Process	1	P78368
5	GO:0046504	glycerol ether biosynthetic process	Biological Process	1	Q6IAN0
5	GO:0046165	alcohol biosynthetic process	Biological Process	2	Q9NPH2,Q9UBM7
5	GO:0046364	monosaccharide biosynthetic process	Biological Process	6	P18847,Q9UJS0,P11310,Q93009,Q16531,Q96EB6
5	GO:0008610	lipid biosynthetic process	Biological Process	12	P28288,P38398,Q6IAN0,Q9BT40,Q9UBM7,Q15648,Q9NPH2,Q96EB6,P78368,P42345,O95573,Q9UMS4
5	GO:0009059	macromolecule biosynthetic process	Biological Process	243	Q07002,O75367,O96028,P04637,P16403,P18847,P27635,P35251,P42224,P49711,P52952,Q09028,Q15022,Q15648,Q15910,Q32MZ4,Q4G0J3,Q7L2J0,Q8TF47,Q96EB6,Q96IZ0,Q96T58,Q9BQ70,Q9UDR5,Q9UMX1,Q9Y3T9,Q9Y4B6,Q9Y6Q3,Q504Q3,Q5TAX3,Q9UIV1,Q15054,Q53T94,Q9UIF9,P05386,P05387,P05388,P15880,P18077,P18124,P18621,P26373,P30050,P35268,P36578,P39023,P40429,P42766,P46776,P46777,P46778,P46779,P46781,P47914,P49207,P50914,P61247,…
5	GO:0016051	carbohydrate biosynthetic process	Biological Process	10	P11310,Q9BT40,Q9NPH2,P18847,Q9UJS0,O75352,Q92839,Q93009,Q16531,Q96EB6
5	GO:0035384	thioester biosynthetic process	Biological Process	1	O95573
5	GO:0090407	organophosphate biosynthetic process	Biological Process	10	O15067,Q96PN6,Q6IAN0,Q9BT40,Q9UJS0,Q9NPH2,Q9HAN9,Q6IA69,O95573,Q16795
5	GO:1901137	carbohydrate derivative biosynthetic process	Biological Process	12	Q92839,Q06210,Q96PN6,O15067,Q08379,O75352,O60502,Q8NAT1,Q9UJS0,O95573,Q16795,Q96IZ0
5	GO:1901362	organic cyclic compound biosynthetic process	Biological Process	155	Q07002,O75367,O96028,P04637,P16403,P18847,P27635,P35251,P42224,P49711,P52952,Q09028,Q15022,Q15648,Q15910,Q32MZ4,Q4G0J3,Q7L2J0,Q8TF47,Q96EB6,Q96IZ0,Q96T58,Q9BQ70,Q9UDR5,Q9UMX1,Q9Y3T9,Q9Y4B6,Q9Y6Q3,Q15054,Q53T94,Q9UIF9,Q06210,O15067,Q96PN6,P42345,P27361,Q13610,Q4G0F4,O60264,P20226,P49848,Q99551,O95625,P28370,P29590,P30153,P67775,P67809,Q02878,Q969X6,Q9BQG0,Q9NRL2,Q9UER7,Q9Y483,O15198,O60216,P35659,…
5	GO:1901503	ether biosynthetic process	Biological Process	1	Q6IAN0
5	GO:1901570	fatty acid derivative biosynthetic process	Biological Process	1	O95573
5	GO:1901617	organic hydroxy compound biosynthetic process	Biological Process	4	Q9NPH2,Q9UBM7,P28288,Q96EB6
5	GO:0010629	negative regulation of gene expression	Biological Process	42	O43159,O60264,Q96EB6,Q9UIF9,Q01780,Q504Q3,Q5TAX3,Q9UIV1,Q06265,Q9NZI8,O00425,P19338,P19525,P40429,P67809,Q2Q1W2,O75569,Q6ZN17,Q9NRL2,P07305,Q15910,O60216,P29590,P49407,Q9HCE1,Q9Y6K5,O75367,P38398,P49458,P06748,Q12872,Q8NDF8,Q7Z2W4,P05455,P49711,Q96RT1,Q15022,P04637,Q86VI3,Q96IZ0,Q9P0L2,Q9UER7
5	GO:0051053	negative regulation of DNA metabolic process	Biological Process	12	P04637,Q9BZE4,P29590,Q01780,Q8NDF8,Q9H0A0,Q9NVN8,P07305,P16403,P20585,Q92522,Q9HAN9
5	GO:0051253	negative regulation of RNA metabolic process	Biological Process	54	O75367,O96028,P04637,P16403,P18847,P27635,P35251,P42224,P49711,P52952,Q09028,Q15022,Q15648,Q15910,Q32MZ4,Q4G0J3,Q7L2J0,Q8TF47,Q96EB6,Q96IZ0,Q96T58,Q9BQ70,Q9UDR5,Q9UMX1,Q9Y3T9,Q9Y4B6,Q9Y6Q3,O60264,Q9NR30,Q9UIF9,Q9NP64,O43159,P11142,P29590,P38398,Q06587,Q8IXK0,Q96K76,Q9BQG0,Q9BT40,Q9HAN9,Q9UBW7,Q9UER7,Q9UIV1,Q9ULD5,Q9UNH7,P06748,Q12872,P67809,Q8NDF8,O00425,Q9NZI8,O95817,Q6ZN17
5	GO:0070874	negative regulation of glycogen metabolic process	Biological Process	1	Q9BT40
5	GO:0010563	negative regulation of phosphorus metabolic process	Biological Process	16	P78527,Q12923,Q8IXB1,Q9BT40,Q9UNH7,Q14738,Q13610,Q96EB6,P30153,P67775,P06748,O95373,Q38SD2,O75367,P62258,P04637
5	GO:0010677	negative regulation of cellular carbohydrate metabolic process	Biological Process	3	Q9BT40,Q93009,P67775
5	GO:0032269	negative regulation of cellular protein metabolic process	Biological Process	43	Q504Q3,Q5TAX3,Q9UIV1,P78527,Q12923,Q8IXB1,Q9BT40,Q9UNH7,Q14738,O00425,P19338,P19525,P40429,P67809,Q2Q1W2,Q9NZI8,O94874,P49407,Q9BZE4,Q9NVN8,P46379,P78559,Q93009,P29590,Q13610,P38398,Q9HCE1,P30153,P67775,Q96K76,Q06265,P06748,O95373,P04637,P49458,Q38SD2,Q8NDF8,Q96DX7,O75367,Q96EB6,P62258,P46777,Q9UMX1
5	GO:0045922	negative regulation of fatty acid metabolic process	Biological Process	2	Q96EB6,P38398
5	GO:0090209	negative regulation of triglyceride metabolic process	Biological Process	1	Q96EB6
5	GO:1901003	negative regulation of fermentation	Biological Process	1	P04637
5	GO:2000378	negative regulation of reactive oxygen species metabolic process	Biological Process	3	Q96PN6,P04637,P38398
5	GO:2000773	negative regulation of cellular senescence	Biological Process	2	P67809,Q96EB6
5	GO:0045721	negative regulation of gluconeogenesis	Biological Process	1	Q93009
5	GO:0045980	negative regulation of nucleotide metabolic process	Biological Process	1	P67775
5	GO:0010628	positive regulation of gene expression	Biological Process	50	P19525,Q9NR30,P38398,Q7Z2W4,O15111,P42224,O14730,Q9H1D9,Q9NW08,Q9Y6K5,O60216,Q92974,Q02952,Q9Y6D5,Q8WVV9,P05455,P06748,P42345,P46777,P61254,P78527,Q8NE71,Q96P11,Q9H0A0,Q9H5U6,O75367,P04637,Q9Y3T9,Q13144,P11142,P19338,Q9UMS4,P67809,O96028,Q96QE3,Q8NDF8,Q96EB6,Q92552,O00425,Q9NZI8,P18847,P49711,P52952,P78362,Q15648,Q86VI3,Q8WZ42,Q96EV8,Q96IZ0,Q9P0L2
5	GO:0051054	positive regulation of DNA metabolic process	Biological Process	23	P29590,Q9BVP2,P17987,P27361,P40227,P49368,P50990,P50991,P78371,Q8TD08,Q99832,P38398,Q96EB6,Q9NXR7,O60264,Q96QE3,Q9NRL2,O96028,P35250,Q93009,Q86U86,P78527,Q02880
5	GO:0051254	positive regulation of RNA metabolic process	Biological Process	67	Q504Q3,Q5TAX3,Q9UIV1,Q15648,Q9NPJ6,Q8WVV9,Q9HCE1,P04637,Q06265,O15111,P06748,P28370,P32780,P35251,P38398,P42224,P49711,P49848,P52952,Q01831,Q09028,Q5TA31,Q68DK7,Q8TF47,Q96DX7,Q9BT40,Q9BW27,Q9Y5X3,O60264,P17480,P35659,Q8TED0,Q9BQG0,Q9H583,Q9NR30,O75475,P18847,P19338,P27361,P49407,P50613,P67809,P78527,Q92974,Q96EB6,Q99459,Q9NQV6,Q9NTW7,Q9Y613,P42345,P11142,Q9UMS4,Q6ZN17,Q86VM9,Q8NDF8,P20226,Q7Z2W4,…
5	GO:0070875	positive regulation of glycogen metabolic process	Biological Process	1	Q96PN6
5	GO:0010562	positive regulation of phosphorus metabolic process	Biological Process	17	P27361,P49407,Q86VI3,Q96EB6,Q96EV8,Q9UER7,Q96PN6,P42345,P10398,Q14738,Q15910,Q9BUZ4,P04637,Q38SD2,Q92974,P67775,O95573
5	GO:0010676	positive regulation of cellular carbohydrate metabolic process	Biological Process	3	Q16531,Q96EB6,Q96PN6
5	GO:0032270	positive regulation of cellular protein metabolic process	Biological Process	52	P27361,P49407,Q86VI3,Q96EB6,Q96EV8,Q9UER7,Q92688,Q9NZJ7,Q9UKL3,Q96PN6,O60264,Q9UIF9,O43159,P29590,P06748,P11021,P38398,O95376,Q15370,Q9Y4X5,P42345,P10398,Q9BVP2,P35659,Q9BQG0,Q9NR30,Q14738,Q15910,P05455,P46777,P61254,P78527,Q8NE71,Q96P11,Q9H0A0,Q9H5U6,Q9BUZ4,Q96F07,Q13144,P04637,Q38SD2,Q92974,Q9UKS6,P15880,Q08379,Q8NDF8,Q92552,P67775,P67809,Q9NZI8,Q15042,P46379
5	GO:0045923	positive regulation of fatty acid metabolic process	Biological Process	1	P50416
5	GO:1903020	positive regulation of glycoprotein metabolic process	Biological Process	2	Q96IZ0,Q08379
5	GO:2000379	positive regulation of reactive oxygen species metabolic process	Biological Process	3	P04899,Q96PN6,P04637
5	GO:2000774	positive regulation of cellular senescence	Biological Process	4	O43324,P04637,Q96EB6,Q96IZ0
5	GO:1903727	positive regulation of phospholipid metabolic process	Biological Process	1	O95573
5	GO:0045821	positive regulation of glycolytic process	Biological Process	1	P42345
5	GO:0010907	positive regulation of glucose metabolic process	Biological Process	3	Q16531,Q96EB6,Q96PN6
5	GO:0045981	positive regulation of nucleotide metabolic process	Biological Process	2	P42345,Q96PN6
5	GO:2001171	positive regulation of ATP biosynthetic process	Biological Process	1	Q96PN6
5	GO:0010565	regulation of cellular ketone metabolic process	Biological Process	3	Q96EB6,P50416,P38398
5	GO:0010675	regulation of cellular carbohydrate metabolic process	Biological Process	9	Q9BT40,P11310,Q96EB6,Q93009,Q16531,Q96PN6,P04637,P67775,P42345
5	GO:0032268	regulation of cellular protein metabolic process	Biological Process	94	P32780,P50613,Q9BZE4,Q504Q3,Q5TAX3,Q9UIV1,P67775,P78527,Q12923,Q8IXB1,Q9BT40,P27361,P49407,Q86VI3,Q96EB6,Q96EV8,Q9UER7,P27635,Q13428,Q96EY7,O60841,Q92688,Q9NZJ7,Q9UKL3,Q9UNH7,Q96PN6,Q14738,O00425,P19338,P19525,P40429,P67809,Q2Q1W2,Q9NZI8,O60264,Q9UIF9,O43159,P29590,O94874,Q9NVN8,P06748,P11021,P38398,O14980,P10398,P46379,P78559,Q93009,O95376,Q15370,Q9Y4X5,P42345,Q13610,Q9BVP2,P35659,Q9BQG0,Q9NR30,…
5	GO:0043467	regulation of generation of precursor metabolites and energy	Biological Process	6	O75367,Q9BT40,Q96PN6,P42345,P04637,P67775
5	GO:0050746	regulation of lipoprotein metabolic process	Biological Process	1	Q15042
5	GO:0051174	regulation of phosphorus metabolic process	Biological Process	36	P32780,P50613,Q9BZE4,P67775,P78527,Q12923,Q8IXB1,Q9BT40,P27361,P49407,Q86VI3,Q96EB6,Q96EV8,Q9UER7,Q9UNH7,Q96PN6,Q14738,P42345,P10398,Q13610,Q9UIV1,P30153,Q15910,P42858,P06748,O95373,Q8WZ42,Q9BUZ4,P19338,Q92610,P04637,Q38SD2,Q92974,O75367,P62258,O95573
5	GO:0090207	regulation of triglyceride metabolic process	Biological Process	1	Q96EB6
5	GO:1903018	regulation of glycoprotein metabolic process	Biological Process	2	Q96IZ0,Q08379
5	GO:1904251	regulation of bile acid metabolic process	Biological Process	1	Q96EB6
5	GO:2000377	regulation of reactive oxygen species metabolic process	Biological Process	4	P04899,Q96PN6,P04637,P38398
5	GO:2000772	regulation of cellular senescence	Biological Process	5	P67809,Q96EB6,O43324,P04637,Q96IZ0
5	GO:0010468	regulation of gene expression	Biological Process	160	Q07002,O75367,O96028,P04637,P16403,P18847,P27635,P35251,P42224,P49711,P52952,Q09028,Q15022,Q15648,Q15910,Q32MZ4,Q4G0J3,Q7L2J0,Q8TF47,Q96EB6,Q96IZ0,Q96T58,Q9BQ70,Q9UDR5,Q9UMX1,Q9Y3T9,Q9Y4B6,Q9Y6Q3,O43159,O60264,Q9UIF9,Q01780,Q504Q3,Q5TAX3,Q9UIV1,Q06265,O00425,Q9NZI8,P19525,Q9NR30,O95625,P28370,P29590,P30153,P67775,P67809,Q02878,Q969X6,Q99551,Q9BQG0,Q9NRL2,Q9UER7,Q9Y483,O15198,O60216,P35659,P38398,…
5	GO:0032069	regulation of nuclease activity	Biological Process	3	P06748,Q96EB6,Q9Y6K5
5	GO:0032881	regulation of polysaccharide metabolic process	Biological Process	2	Q9BT40,Q96PN6
5	GO:0043471	regulation of cellular carbohydrate catabolic process	Biological Process	3	Q96PN6,P04637,P42345
5	GO:0051052	regulation of DNA metabolic process	Biological Process	44	P52292,O60264,P30153,P67775,Q56NI9,Q9NRL2,P38398,P49848,Q9NXR7,P04637,Q9BZE4,P49736,P06748,Q96EB6,P29590,Q9BVP2,Q01780,Q8NDF8,Q9H0A0,Q9NVN8,P17987,P27361,P40227,P49368,P50990,P50991,P78371,Q8TD08,Q99832,P49711,Q93009,Q9UIF9,Q96QE3,P07305,P16403,P20585,Q92522,O96028,P35250,Q9HAN9,P35659,Q86U86,P78527,Q02880
5	GO:0051252	regulation of RNA metabolic process	Biological Process	130	Q07002,O75367,O96028,P04637,P16403,P18847,P27635,P35251,P42224,P49711,P52952,Q09028,Q15022,Q15648,Q15910,Q32MZ4,Q4G0J3,Q7L2J0,Q8TF47,Q96EB6,Q96IZ0,Q96T58,Q9BQ70,Q9UDR5,Q9UMX1,Q9Y3T9,Q9Y4B6,Q9Y6Q3,Q504Q3,Q5TAX3,Q9UIV1,O60264,O95625,P28370,P29590,P30153,P67775,P67809,Q02878,Q969X6,Q99551,Q9BQG0,Q9NRL2,Q9UER7,Q9UIF9,Q9Y483,O15198,O60216,P35659,P38398,P49407,P49848,P51814,Q15776,Q15843,Q3KP31,Q6ZN55,…
5	GO:0006140	regulation of nucleotide metabolic process	Biological Process	3	P42345,P67775,Q96PN6
5	GO:0010906	regulation of glucose metabolic process	Biological Process	7	Q9BT40,P11310,Q93009,Q16531,Q96EB6,Q96PN6,P04637
5	GO:0006109	regulation of carbohydrate metabolic process	Biological Process	9	Q9BT40,P11310,Q96EB6,Q93009,Q16531,Q96PN6,P42345,P04637,P67775
5	GO:0019216	regulation of lipid metabolic process	Biological Process	6	Q96EB6,P50416,P38398,P42345,O95573,O75367
5	GO:0002082	regulation of oxidative phosphorylation	Biological Process	1	O75367
5	GO:0006110	regulation of glycolytic process	Biological Process	2	P42345,P67775
5	GO:2001169	regulation of ATP biosynthetic process	Biological Process	1	Q96PN6
5	GO:0001510	RNA methylation	Biological Process	11	Q6IN84,Q7Z2T5,Q9H5U6,Q9UNQ2,P46087,Q96P11,Q9BVS5,Q75N03,Q4G0J3,B2RD09,Q7L2J0
5	GO:0006306	DNA methylation	Biological Process	6	P49711,Q93009,O60264,Q9UIF9,Q16531,Q15910
5	GO:0006479	protein methylation	Biological Process	3	O60725,O60264,Q9UIF9
5	GO:0016132	brassinosteroid biosynthetic process	Biological Process	1	Q9UBM7
5	GO:0008209	androgen metabolic process	Biological Process	1	Q15648
5	GO:0006590	thyroid hormone generation	Biological Process	1	Q15648
5	GO:0043436	oxoacid metabolic process	Biological Process	23	P28288,O95573,P50416,P49588,P08243,P35520,P15104,O15067,Q06210,Q9H2H9,Q9HCC0,Q9UDR5,P42898,P38398,P11310,Q9UJS0,Q99707,P04637,Q96EB6,Q9Y2Z4,P42345,O60725,P67775
5	GO:0097089	methyl-branched fatty acid metabolic process	Biological Process	1	P28288
5	GO:0015980	energy derivation by oxidation of organic compounds	Biological Process	15	O75367,I3L213,P46020,Q93100,P11310,Q9BT40,P42345,Q06210,Q16795,P43304,P78537,P04637,Q9BQG0,Q9UJS0,Q96PN6
5	GO:0022900	electron transport chain	Biological Process	4	Q16795,P43304,Q9BQG0,Q9UJS0
5	GO:0002183	cytoplasmic translational initiation	Biological Process	2	P40429,P42345
5	GO:0006446	regulation of translational initiation	Biological Process	6	P29590,P42345,Q13144,P06748,P40429,O60841
5	GO:0045947	negative regulation of translational initiation	Biological Process	2	P29590,P40429
5	GO:0045948	positive regulation of translational initiation	Biological Process	2	P42345,Q13144
5	GO:0006760	folic acid-containing compound metabolic process	Biological Process	2	P42898,Q99707
5	GO:0042398	cellular modified amino acid biosynthetic process	Biological Process	2	P11310,Q9NVH6
5	GO:0046498	S-adenosylhomocysteine metabolic process	Biological Process	1	O60725
5	GO:0018958	phenol-containing compound metabolic process	Biological Process	1	Q15648
5	GO:0035999	tetrahydrofolate interconversion	Biological Process	1	P42898
5	GO:0016226	iron-sulfur cluster assembly	Biological Process	2	P38646,Q9Y3D0
5	GO:0046499	S-adenosylmethioninamine metabolic process	Biological Process	1	O60725
5	GO:0070813	hydrogen sulfide metabolic process	Biological Process	1	P35520
5	GO:0006047	UDP-N-acetylglucosamine metabolic process	Biological Process	1	Q06210
5	GO:0006796	phosphate-containing compound metabolic process	Biological Process	67	P32780,P50613,Q9BZE4,P67775,P78527,Q12923,Q8IXB1,Q9BT40,P27361,P49407,Q86VI3,Q96EB6,Q96EV8,Q9UER7,Q06210,P43304,O15067,Q96PN6,O15111,P19525,P41743,P42345,P78362,P78368,Q13523,Q8TF05,Q96SB4,Q9P0L2,O00743,P30153,P63151,Q14738,Q6IAN0,Q9UJS0,Q9UNH7,Q9NPH2,Q9HAN9,P19174,Q6IA69,Q9HCC0,O14730,P10398,P11387,Q07002,Q38SD2,Q8WZ42,Q9Y4B6,Q9NYB9,Q6SZW1,Q13610,Q9UDR5,O95573,Q9UIV1,Q16795,Q15910,P42858,P06748,…
5	GO:1901661	quinone metabolic process	Biological Process	2	Q9BQB6,Q16795
5	GO:0006490	oligosaccharide-lipid intermediate biosynthetic process	Biological Process	1	O75352
5	GO:0006631	fatty acid metabolic process	Biological Process	6	P28288,O95573,P50416,P38398,P11310,Q96EB6
5	GO:0006638	neutral lipid metabolic process	Biological Process	2	P50416,Q96EB6
5	GO:0006643	membrane lipid metabolic process	Biological Process	3	P30153,P67775,P78368
5	GO:0006644	phospholipid metabolic process	Biological Process	6	Q6IAN0,Q9BT40,Q9NPH2,P19174,Q8IY17,O95573
5	GO:0030258	lipid modification	Biological Process	4	P11310,P28288,P50416,Q9BT40
5	GO:0046485	ether lipid metabolic process	Biological Process	1	Q6IAN0
5	GO:0046486	glycerolipid metabolic process	Biological Process	7	P50416,Q96EB6,Q6IAN0,Q9BT40,Q8IY17,P19174,O95573
5	GO:0097384	cellular lipid biosynthetic process	Biological Process	1	Q6IAN0
5	GO:0006259	DNA metabolic process	Biological Process	83	P49917,Q96EB6,P52292,Q02880,Q96AY2,Q01831,P78527,P38398,O75419,P49736,Q9BRT9,Q15054,P11387,P49005,Q09028,Q13112,Q9BQ67,O75717,P35250,P35251,Q9BV38,Q9NRL2,Q96RR1,Q14691,Q9BRX5,O60264,P30153,P67775,Q56NI9,O75367,O94874,P06748,P20585,P32780,P50613,Q14807,Q149N8,Q16531,Q96K58,Q96RU2,Q99459,P49848,Q9NXR7,Q93009,Q96K76,P04637,O60216,O96028,Q9Y4F3,Q9UMS4,P49711,Q15910,Q9UIF9,Q9BZE4,P29590,Q9BVP2,Q01780,…
5	GO:0009100	glycoprotein metabolic process	Biological Process	6	Q08379,Q06210,O75352,O60502,Q8NAT1,Q96IZ0
5	GO:0043112	receptor metabolic process	Biological Process	3	Q9Y6D5,Q6IAA8,O43933
5	GO:0044264	cellular polysaccharide metabolic process	Biological Process	7	I3L213,P46020,Q93100,P11310,Q9BT40,Q92839,Q96PN6
5	GO:0044267	cellular protein metabolic process	Biological Process	223	P32780,P50613,Q9BZE4,O95376,Q149N8,Q9UMS4,Q504Q3,Q5TAX3,Q9UIV1,Q9UBW8,Q13427,P67775,P78527,Q12923,Q8IXB1,Q9BT40,P27361,P49407,Q86VI3,Q96EB6,Q96EV8,Q9UER7,P05386,P05387,P05388,P15880,P18077,P18124,P18621,P26373,P27635,P30050,P35268,P36578,P39023,P40429,P42766,P46776,P46777,P46778,P46779,P46781,P47914,P49207,P50914,P61247,P61254,P61353,P61927,P62241,P62266,P62280,P62424,P62750,P62753,P62847,P62888,…
5	GO:0006020	inositol metabolic process	Biological Process	1	Q9NPH2
5	GO:0019400	alditol metabolic process	Biological Process	1	P43304
5	GO:0006801	superoxide metabolic process	Biological Process	2	P04899,P35520
5	GO:0090400	stress-induced premature senescence	Biological Process	2	P04637,Q96EB6
5	GO:0090402	oncogene-induced cell senescence	Biological Process	1	P29590
5	GO:0005976	polysaccharide metabolic process	Biological Process	7	I3L213,P46020,Q93100,P11310,Q9BT40,Q92839,Q96PN6
5	GO:0009311	oligosaccharide metabolic process	Biological Process	1	O75352
5	GO:0034654	nucleobase-containing compound biosynthetic process	Biological Process	153	Q07002,O75367,O96028,P04637,P16403,P18847,P27635,P35251,P42224,P49711,P52952,Q09028,Q15022,Q15648,Q15910,Q32MZ4,Q4G0J3,Q7L2J0,Q8TF47,Q96EB6,Q96IZ0,Q96T58,Q9BQ70,Q9UDR5,Q9UMX1,Q9Y3T9,Q9Y4B6,Q9Y6Q3,Q15054,Q53T94,Q9UIF9,Q06210,O15067,Q96PN6,P27361,Q13610,Q4G0F4,O60264,P20226,P49848,Q99551,O95625,P28370,P29590,P30153,P67775,P67809,Q02878,Q969X6,Q9BQG0,Q9NRL2,Q9UER7,Q9Y483,O15198,O60216,P35659,P38398,…
5	GO:0034655	nucleobase-containing compound catabolic process	Biological Process	21	Q01780,Q504Q3,Q5TAX3,Q9UIV1,Q06265,Q9NRW3,Q6ZN17,Q8NDF8,Q9NZI8,Q6SZW1,Q9HCE1,Q9NP64,P67809,Q86VM9,Q7Z2W4,Q2Q1W2,O00425,P05455,Q9HAN9,P06748,A7E2V4
5	GO:0090304	nucleic acid metabolic process	Biological Process	252	P49917,Q96EB6,P52292,Q07002,O75367,O96028,P04637,P16403,P18847,P27635,P35251,P42224,P49711,P52952,Q09028,Q15022,Q15648,Q15910,Q32MZ4,Q4G0J3,Q7L2J0,Q8TF47,Q96IZ0,Q96T58,Q9BQ70,Q9UDR5,Q9UMX1,Q9Y3T9,Q9Y4B6,Q9Y6Q3,Q6IN84,Q9H0A0,Q01780,Q15020,Q9UMS4,P78362,Q96SB4,Q504Q3,Q5TAX3,Q9UIV1,O75934,Q12872,O75475,O43660,P11142,Q13523,Q8WYA6,Q99459,Q9HCG8,Q9Y388,Q9Y324,Q14137,O95478,P78527,Q9H9Y2,O15213,P62241,…
5	GO:0008652	cellular amino acid biosynthetic process	Biological Process	7	P08243,P35520,P15104,P42898,Q99707,Q9H2H9,Q9UDR5
5	GO:0009063	cellular amino acid catabolic process	Biological Process	4	P15104,Q9HCC0,Q9UDR5,P35520
5	GO:0009081	branched-chain amino acid metabolic process	Biological Process	1	Q9HCC0
5	GO:0009448	gamma-aminobutyric acid metabolic process	Biological Process	1	Q9H2H9
5	GO:0043038	amino acid activation	Biological Process	2	P49588,Q9Y2Z4
5	GO:1901605	alpha-amino acid metabolic process	Biological Process	12	P08243,P35520,P15104,O15067,Q06210,Q9H2H9,Q9HCC0,Q9UDR5,P42898,Q9UJS0,Q99707,O60725
5	GO:0008202	steroid metabolic process	Biological Process	4	Q9UBM7,P28288,Q15648,Q96EB6
5	GO:0006508	proteolysis	Biological Process	58	Q9UBW8,Q8TCT9,A8K9U1,O95376,P46379,P49407,P62256,Q13564,Q15843,Q16531,Q562E7,Q9UJX2,Q9Y4X5,Q9H8Y5,Q99797,Q92688,Q9NZJ7,Q9UKL3,Q9UMS4,O00507,Q93009,Q96RU2,P11021,P27824,Q8IXB1,Q96CS3,Q13042,Q9UJX3,Q9UJX4,Q9UJX5,Q13617,O14980,O94874,P10398,P78559,Q15370,Q96K76,Q9NXW2,A7E2V4,O94888,P29590,Q13362,Q16186,Q2Q1W2,Q5TA31,Q96EB6,Q9BUZ4,P04637,Q96F07,Q9UKS6,P61289,Q9NXR7,O60524,P46777,Q9UMX1,P48147,Q4J6C6,…
5	GO:0030163	protein catabolic process	Biological Process	51	A8K9U1,O95376,P46379,P49407,P62256,Q13564,Q15843,Q16531,Q562E7,Q9UJX2,Q9Y4X5,Q9H8Y5,O60502,Q9Y5X3,Q9UMS4,P11021,P27824,Q8IXB1,Q96CS3,Q13042,Q9UJX3,Q9UJX4,Q9UJX5,Q13617,O14980,O94874,P10398,P78559,Q93009,Q15370,Q9NXW2,A7E2V4,O94888,P29590,Q13362,Q16186,Q2Q1W2,Q5TA31,Q96EB6,Q9BUZ4,Q9Y4B6,Q9UKS6,P61289,O95817,P11142,Q96RU2,O60524,Q8TCT9,P46777,Q9UMX1,P42345
5	GO:0036211	protein modification process	Biological Process	113	P32780,P50613,Q9BZE4,O95376,Q149N8,Q9UMS4,Q9UBW8,Q13427,P67775,P78527,Q12923,Q8IXB1,Q9BT40,P27361,P49407,Q86VI3,Q96EB6,Q96EV8,Q9UER7,O15111,P19525,P41743,P42345,P78362,P78368,Q13523,Q8TF05,Q96SB4,Q9P0L2,O00743,P30153,P63151,Q14738,Q9H0A0,O60725,Q08379,Q06210,O75352,O60502,Q8NAT1,Q9UNH7,Q96PN6,A7E2V4,P38398,Q06587,Q13042,Q13564,Q13617,Q15370,Q15648,Q16531,Q75N03,Q7Z569,Q93009,Q96DX7,Q9P253,Q9UJX2,…
5	GO:0042157	lipoprotein metabolic process	Biological Process	2	P15104,Q15042
5	GO:0042982	amyloid precursor protein metabolic process	Biological Process	1	Q96IZ0
5	GO:0051604	protein maturation	Biological Process	4	Q8TCT9,Q99797,Q96F07,Q9Y3D0
5	GO:0019318	hexose metabolic process	Biological Process	11	Q9BT40,P50416,Q9Y4D8,Q96PN6,P18847,Q9UJS0,P11310,Q96EB6,P04637,Q93009,Q16531
5	GO:0019751	polyol metabolic process	Biological Process	2	Q9NPH2,P43304
5	GO:0034308	primary alcohol metabolic process	Biological Process	1	P43304
5	GO:1902652	secondary alcohol metabolic process	Biological Process	1	Q9UBM7
5	GO:0006767	water-soluble vitamin metabolic process	Biological Process	1	Q99707
5	GO:0006775	fat-soluble vitamin metabolic process	Biological Process	1	Q9BQB6
5	GO:0006662	glycerol ether metabolic process	Biological Process	1	Q6IAN0
5	GO:0006753	nucleoside phosphate metabolic process	Biological Process	12	O15067,Q96PN6,Q9UJS0,Q9HAN9,Q6IA69,Q9HCC0,Q6SZW1,Q9UDR5,O95573,Q16795,P42345,P67775
5	GO:0009225	nucleotide-sugar metabolic process	Biological Process	1	Q06210
5	GO:0019646	aerobic electron transport chain	Biological Process	1	Q16795
5	GO:0042773	ATP synthesis coupled electron transport	Biological Process	1	Q16795
5	GO:0042776	proton motive force-driven mitochondrial ATP synthesis	Biological Process	1	Q16795
5	GO:0015986	proton motive force-driven ATP synthesis	Biological Process	1	Q16795
5	GO:0006096	glycolytic process	Biological Process	2	P42345,P67775
5	GO:0006486	protein glycosylation	Biological Process	5	Q06210,O75352,O60502,Q8NAT1,Q08379
5	GO:0035268	protein mannosylation	Biological Process	1	Q8NAT1
5	GO:1901535	regulation of DNA demethylation	Biological Process	1	Q93009
5	GO:1901537	positive regulation of DNA demethylation	Biological Process	1	Q93009
5	GO:0006002	fructose 6-phosphate metabolic process	Biological Process	1	Q06210
5	GO:0019693	ribose phosphate metabolic process	Biological Process	9	Q96PN6,O15067,Q9UJS0,Q9HCC0,Q9UDR5,O95573,Q16795,P42345,P67775
5	GO:0051156	glucose 6-phosphate metabolic process	Biological Process	2	P04637,P42345
5	GO:0052646	alditol phosphate metabolic process	Biological Process	1	P43304
5	GO:0006637	acyl-CoA metabolic process	Biological Process	2	Q9UDR5,O95573
5	GO:0010467	gene expression	Biological Process	292	Q07002,O75367,O96028,P04637,P16403,P18847,P27635,P35251,P42224,P49711,P52952,Q09028,Q15022,Q15648,Q15910,Q32MZ4,Q4G0J3,Q7L2J0,Q8TF47,Q96EB6,Q96IZ0,Q96T58,Q9BQ70,Q9UDR5,Q9UMX1,Q9Y3T9,Q9Y4B6,Q9Y6Q3,Q6IN84,Q9H0A0,O43159,O60264,Q9UIF9,Q01780,Q15020,Q9UMS4,P78362,Q96SB4,Q504Q3,Q5TAX3,Q9UIV1,O75934,Q12872,O75475,O43660,P11142,Q13523,Q8WYA6,Q99459,Q9HCG8,Q9Y388,Q9Y324,Q14137,O95478,P78527,Q9H9Y2,O15213,…
5	GO:0043412	macromolecule modification	Biological Process	129	P32780,P50613,Q9BZE4,Q6IN84,Q9H0A0,O95376,Q149N8,Q9UMS4,Q9UBW8,Q13427,B2RD09,Q7L2J0,P67775,P78527,Q12923,Q8IXB1,Q9BT40,P27361,P49407,Q86VI3,Q96EB6,Q96EV8,Q9UER7,Q7Z2T5,P49711,Q15910,Q9UIF9,P05455,P49588,Q9NXG2,O15111,P19525,P41743,P42345,P78362,P78368,Q13523,Q8TF05,Q96SB4,Q9P0L2,O00743,P30153,P63151,Q14738,O60725,Q08379,Q06210,O75352,O60502,Q8NAT1,Q9UNH7,Q96PN6,Q9NRW3,A7E2V4,P38398,Q06587,Q13042,…
5	GO:0006040	amino sugar metabolic process	Biological Process	2	O60502,Q06210
5	GO:1901657	glycosyl compound metabolic process	Biological Process	2	Q9NRW3,O60725
5	GO:0035337	fatty-acyl-CoA metabolic process	Biological Process	1	O95573
5	GO:0006089	lactate metabolic process	Biological Process	1	P04637
5	GO:0008206	bile acid metabolic process	Biological Process	2	P28288,Q96EB6
5	GO:0016125	sterol metabolic process	Biological Process	1	Q9UBM7
5	GO:0016128	phytosteroid metabolic process	Biological Process	1	Q9UBM7
5	GO:0070527	platelet aggregation	Biological Process	1	Q9NUP1
5	GO:0035733	hepatic stellate cell activation	Biological Process	1	Q02952
5	GO:0001910	regulation of leukocyte mediated cytotoxicity	Biological Process	1	O43747
5	GO:0001912	positive regulation of leukocyte mediated cytotoxicity	Biological Process	1	O43747
5	GO:0042267	natural killer cell mediated cytotoxicity	Biological Process	2	O43747,P07437
5	GO:0051084	'de novo' post-translational protein folding	Biological Process	6	P11021,P11142,P17066,P38646,Q9NXW2,P78371
5	GO:0060904	regulation of protein folding in endoplasmic reticulum	Biological Process	1	P11021
5	GO:0051085	chaperone cofactor-dependent protein refolding	Biological Process	5	P11021,P11142,P17066,P38646,Q9NXW2
5	GO:0051086	chaperone mediated protein folding independent of cofactor	Biological Process	1	P78371
5	GO:0048207	vesicle targeting, rough ER to cis-Golgi	Biological Process	3	Q8TD08,Q9HCU5,O00743
5	GO:0003341	cilium movement	Biological Process	3	Q96PN6,Q9UL16,Q9NYC9
5	GO:0034643	establishment of mitochondrion localization, microtubule-mediated	Biological Process	1	Q66K74
5	GO:0060632	regulation of microtubule-based movement	Biological Process	1	Q9UL16
5	GO:0099111	microtubule-based transport	Biological Process	17	Q96PN6,P78537,Q8TDH9,Q92572,Q96EV8,Q9NUP1,Q9GZM8,P42858,Q66K74,Q9UL16,Q92845,Q9BQS8,Q9UBF2,Q9NYC9,O95817,P78559,P11142
5	GO:0030050	vesicle transport along actin filament	Biological Process	1	O00160
5	GO:0070252	actin-mediated cell contraction	Biological Process	1	Q96PN6
5	GO:1903115	regulation of actin filament-based movement	Biological Process	1	Q96PN6
5	GO:0106135	negative regulation of cardiac muscle cell contraction	Biological Process	1	Q96PN6
5	GO:0007411	axon guidance	Biological Process	4	P83731,Q8TER5,Q96F07,Q9BPU6
5	GO:0001578	microtubule bundle formation	Biological Process	1	Q66K74
5	GO:0007020	microtubule nucleation	Biological Process	7	O94927,Q7Z4H7,Q9BT25,Q5VU43,Q14155,Q08379,Q9GZM8
5	GO:0031109	microtubule polymerization or depolymerization	Biological Process	13	Q8NI77,Q08379,Q9GZM8,Q92974,O94927,Q7Z4H7,Q9BT25,Q96BD8,P78559,Q66K74,Q9BTW9,Q5VU43,Q14155
5	GO:0031122	cytoplasmic microtubule organization	Biological Process	2	Q5VU43,Q8IYT4
5	GO:0034453	microtubule anchoring	Biological Process	1	Q66K74
5	GO:0051013	microtubule severing	Biological Process	1	Q8IYT4
5	GO:0051293	establishment of spindle localization	Biological Process	3	P42858,Q9GZM8,Q9BXS6
5	GO:0070507	regulation of microtubule cytoskeleton organization	Biological Process	12	Q92974,O94927,Q7Z4H7,Q9BT25,Q96BD8,P78559,Q66K74,Q9BTW9,Q5VU43,Q8TD08,Q14155,Q8NI77
5	GO:1902850	microtubule cytoskeleton organization involved in mitosis	Biological Process	7	P42858,Q9GZM8,Q15813,Q66K74,Q9H3R5,Q9BXS6,Q08379
5	GO:0098534	centriole assembly	Biological Process	2	P06748,P38398
5	GO:0046605	regulation of centrosome cycle	Biological Process	5	O14980,P06748,Q96EB6,Q9H0A0,P38398
5	GO:0007346	regulation of mitotic cell cycle	Biological Process	35	P04637,P29590,P61254,Q13362,Q9NYZ3,Q96Q89,P38398,Q9NXR7,Q9UJX2,O60216,Q96K76,Q86U86,Q9UJX5,P78527,Q01831,Q96AY2,Q9BXW9,Q13564,Q9BXS6,Q13042,Q9UJX3,Q9UJX4,Q9NVX2,P08243,Q9H6S0,O43660,Q7L2J0,Q16531,Q96QE3,P50613,P61289,P67775,Q15910,P62258,Q96EB6
5	GO:0045930	negative regulation of mitotic cell cycle	Biological Process	17	P04637,P29590,P61254,Q13362,Q9NYZ3,P38398,Q9NXR7,O60216,Q96K76,P78527,Q01831,Q96AY2,Q9BXW9,Q13564,Q9H6S0,Q15910,Q9NVX2
5	GO:0045931	positive regulation of mitotic cell cycle	Biological Process	7	Q13042,Q9UJX2,Q9UJX3,Q9UJX4,O43660,Q7L2J0,P08243
5	GO:0045736	negative regulation of cyclin-dependent protein serine/threonine kinase activity	Biological Process	1	O95373
5	GO:1904029	regulation of cyclin-dependent protein kinase activity	Biological Process	4	P32780,P50613,Q9BZE4,O95373
5	GO:0051306	mitotic sister chromatid separation	Biological Process	8	Q9UJX2,Q86U86,Q9UJX5,O60216,Q13042,Q9UJX3,Q9UJX4,P30153
5	GO:1905818	regulation of chromosome separation	Biological Process	9	Q9UJX2,Q86U86,Q9UJX5,O60216,Q13042,Q9UJX3,Q9UJX4,Q8TD08,Q86XI2
5	GO:1905819	negative regulation of chromosome separation	Biological Process	1	O60216
5	GO:1905820	positive regulation of chromosome separation	Biological Process	6	Q13042,Q9UJX2,Q9UJX3,Q9UJX4,Q8TD08,Q86XI2
5	GO:0033045	regulation of sister chromatid segregation	Biological Process	9	Q9UJX2,Q86U86,Q9UJX5,O60216,Q13042,Q9UJX3,Q9UJX4,Q96EB6,Q8TD08
5	GO:0033046	negative regulation of sister chromatid segregation	Biological Process	1	O60216
5	GO:0051986	negative regulation of attachment of spindle microtubules to kinetochore	Biological Process	1	Q96EB6
5	GO:0000819	sister chromatid segregation	Biological Process	22	Q86XI2,Q8NI77,Q9BXS6,O60216,Q14807,Q9H4I0,Q56NI9,Q9NTI5,Q8WZ42,Q9UJX2,Q86U86,Q9UJX5,O75367,Q13042,Q9UJX3,Q9UJX4,P30153,P49711,Q96EB6,Q8TD08,O60264,Q02880
5	GO:0019228	neuronal action potential	Biological Process	1	P42345
5	GO:0031669	cellular response to nutrient levels	Biological Process	16	P11142,P15104,P42345,P49754,Q96EB6,P18847,P19525,P27361,O43159,P04637,P08243,P11021,Q9BQG0,Q9Y4P3,Q15648,Q6IAA8
5	GO:0042262	DNA protection	Biological Process	1	P35520
5	GO:0010812	negative regulation of cell-substrate adhesion	Biological Process	1	Q9BTW9
5	GO:0022408	negative regulation of cell-cell adhesion	Biological Process	2	Q96IZ0,Q9BZE4
5	GO:0010810	regulation of cell-substrate adhesion	Biological Process	2	Q9BTW9,Q14155
5	GO:0022407	regulation of cell-cell adhesion	Biological Process	8	Q9BZE4,Q08722,Q96QZ7,P42345,P30825,Q96IZ0,Q86U86,Q92845
5	GO:0007160	cell-matrix adhesion	Biological Process	2	Q14155,Q9UL63
5	GO:0010811	positive regulation of cell-substrate adhesion	Biological Process	1	Q14155
5	GO:0034446	substrate adhesion-dependent cell spreading	Biological Process	1	Q14155
5	GO:0022409	positive regulation of cell-cell adhesion	Biological Process	6	P42345,P30825,Q86U86,Q92845,Q08722,Q96QZ7
5	GO:0007159	leukocyte cell-cell adhesion	Biological Process	6	P42345,P30825,Q96IZ0,Q86U86,Q08722,Q9H2X3
5	GO:0034109	homotypic cell-cell adhesion	Biological Process	1	Q9NUP1
5	GO:0098742	cell-cell adhesion via plasma-membrane adhesion molecules	Biological Process	1	Q92845
5	GO:0051294	establishment of spindle orientation	Biological Process	2	P42858,Q9GZM8
5	GO:0061162	establishment of monopolar cell polarity	Biological Process	1	P41743
5	GO:2000114	regulation of establishment of cell polarity	Biological Process	1	Q96Q89
5	GO:0035088	establishment or maintenance of apical/basal cell polarity	Biological Process	2	P41743,Q96RT1
5	GO:0002221	pattern recognition receptor signaling pathway	Biological Process	6	Q6SZW1,O15111,Q9Y6K5,O14730,Q96RT1,Q7Z2W4
5	GO:0002768	immune response-regulating cell surface receptor signaling pathway	Biological Process	6	P46379,P19174,Q13144,Q14232,Q96IZ0,Q08722
5	GO:0006983	ER overload response	Biological Process	2	P04637,P11021
5	GO:0036499	PERK-mediated unfolded protein response	Biological Process	2	P11021,P57088
5	GO:0036500	ATF6-mediated unfolded protein response	Biological Process	1	P11021
5	GO:0007167	enzyme linked receptor protein signaling pathway	Biological Process	23	P19174,Q96RT1,Q9Y5X3,Q9UNH7,O00507,O15198,P04637,P29590,Q96EB6,P27361,Q92572,Q9GZM8,Q2Q1W2,P11021,Q09028,P19338,Q92610,Q9BT40,P04899,Q14155,Q92558,Q96F07,Q8N1F7
5	GO:0007215	glutamate receptor signaling pathway	Biological Process	2	Q14831,P39086
5	GO:0007219	Notch signaling pathway	Biological Process	5	P49407,P41743,Q6NW34,Q96T58,Q9NVX2
5	GO:0007224	smoothened signaling pathway	Biological Process	2	Q9UMX1,Q7Z3E5
5	GO:0007229	integrin-mediated signaling pathway	Biological Process	2	Q08722,Q96RT1
5	GO:0019221	cytokine-mediated signaling pathway	Biological Process	9	Q96DX7,O15111,P04637,P42224,Q96EB6,Q15648,Q9UIV1,Q9Y6K5,P27361
5	GO:0023035	CD40 signaling pathway	Biological Process	1	Q9BXW9
5	GO:0031663	lipopolysaccharide-mediated signaling pathway	Biological Process	1	P27361
5	GO:0035385	Roundabout signaling pathway	Biological Process	1	Q13459
5	GO:0035590	purinergic nucleotide receptor signaling pathway	Biological Process	1	P04899
5	GO:0036337	Fas signaling pathway	Biological Process	1	Q9UKL3
5	GO:0038179	neurotrophin signaling pathway	Biological Process	2	Q92558,Q96F07
5	GO:0071526	semaphorin-plexin signaling pathway	Biological Process	1	O94887
5	GO:0097191	extrinsic apoptotic signaling pathway	Biological Process	11	O95817,Q9H0S4,Q9UER7,Q9UKL3,P38398,Q92974,P18847,P42858,P61289,P29590,P30153
5	GO:0097696	receptor signaling pathway via STAT	Biological Process	5	P42224,Q13610,Q9UIV1,P30153,P67775
5	GO:0007188	adenylate cyclase-modulating G protein-coupled receptor signaling pathway	Biological Process	3	P04899,Q02952,Q14831
5	GO:0007213	G protein-coupled acetylcholine receptor signaling pathway	Biological Process	1	P04899
5	GO:0007216	G protein-coupled glutamate receptor signaling pathway	Biological Process	1	Q14831
5	GO:0007218	neuropeptide signaling pathway	Biological Process	1	Q9NQS5
5	GO:0008277	regulation of G protein-coupled receptor signaling pathway	Biological Process	2	P49407,P04899
5	GO:0035588	G protein-coupled purinergic receptor signaling pathway	Biological Process	1	P04899
5	GO:0045744	negative regulation of G protein-coupled receptor signaling pathway	Biological Process	2	P49407,P04899
5	GO:0071875	adrenergic receptor signaling pathway	Biological Process	1	P04899
5	GO:0086103	G protein-coupled receptor signaling pathway involved in heart process	Biological Process	1	P04899
5	GO:0060159	regulation of dopamine receptor signaling pathway	Biological Process	1	Q96EV8
5	GO:0002154	thyroid hormone mediated signaling pathway	Biological Process	1	Q15648
5	GO:0043401	steroid hormone mediated signaling pathway	Biological Process	7	Q15648,Q8TDD1,Q9UER7,O94874,P38398,Q9P253,Q96EB6
5	GO:0001959	regulation of cytokine-mediated signaling pathway	Biological Process	4	Q96DX7,Q15648,Q9UIV1,Q9Y6K5
5	GO:0008589	regulation of smoothened signaling pathway	Biological Process	2	Q9UMX1,Q7Z3E5
5	GO:0008593	regulation of Notch signaling pathway	Biological Process	3	P49407,P41743,Q6NW34
5	GO:0023058	adaptation of signaling pathway	Biological Process	1	P49407
5	GO:0030111	regulation of Wnt signaling pathway	Biological Process	7	P52952,P78368,Q38SD2,Q96K76,Q9NVX2,P30153,P67775
5	GO:0033143	regulation of intracellular steroid hormone receptor signaling pathway	Biological Process	5	O94874,P38398,Q9P253,Q15648,Q96EB6
5	GO:0035358	regulation of peroxisome proliferator activated receptor signaling pathway	Biological Process	1	Q96EB6
5	GO:0046626	regulation of insulin receptor signaling pathway	Biological Process	6	P19338,Q92610,Q9BT40,P04899,Q96EB6,Q9Y5X3
5	GO:0048385	regulation of retinoic acid receptor signaling pathway	Biological Process	1	Q15910
5	GO:0051386	regulation of neurotrophin TRK receptor signaling pathway	Biological Process	2	Q92558,Q96F07
5	GO:0060390	regulation of SMAD protein signal transduction	Biological Process	1	Q8N1F7
5	GO:0070562	regulation of vitamin D receptor signaling pathway	Biological Process	1	Q15648
5	GO:0090092	regulation of transmembrane receptor protein serine/threonine kinase signaling pathway	Biological Process	6	P04637,P11021,Q09028,Q96EB6,Q9UNH7,Q8N1F7
5	GO:1900101	regulation of endoplasmic reticulum unfolded protein response	Biological Process	3	P11021,O94874,P57088
5	GO:1901184	regulation of ERBB signaling pathway	Biological Process	2	Q9Y5X3,Q9UNH7
5	GO:1902531	regulation of intracellular signal transduction	Biological Process	57	Q02952,P35520,P10398,Q96EB6,Q6IAA8,Q9Y6D5,P27361,Q14596,P19525,Q13459,Q92974,P49407,P57737,O14730,O94874,Q9BUZ4,O15111,Q13325,Q7Z2W4,Q9NR30,P42224,Q15910,Q9BT40,P30153,Q86VI3,Q9HAN9,P04637,P06748,O43324,A7KAX9,Q86X10,Q8TER5,Q12923,P42345,P67775,P18847,P04899,Q96RT1,Q96DX7,P46087,P46777,Q14137,Q14146,Q93009,P29590,P61927,P61254,Q96QE3,Q96K76,Q38SD2,Q96PN6,P42858,P38398,Q9NXR7,Q9Y3T9,O75569,P49848
5	GO:1904892	regulation of receptor signaling pathway via STAT	Biological Process	3	Q13610,P30153,P67775
5	GO:2000348	regulation of CD40 signaling pathway	Biological Process	1	Q9BXW9
5	GO:2001233	regulation of apoptotic signaling pathway	Biological Process	18	P38398,Q92974,Q96EB6,Q96QE3,P61254,Q96K76,P04637,Q96PN6,P18847,P04899,O43324,P42858,P61289,P29590,P30153,Q9Y3T9,O75569,P49848
5	GO:0001961	positive regulation of cytokine-mediated signaling pathway	Biological Process	2	Q15648,Q96DX7
5	GO:0030177	positive regulation of Wnt signaling pathway	Biological Process	4	P78368,Q38SD2,Q96K76,Q9NVX2
5	GO:0031587	positive regulation of inositol 1,4,5-trisphosphate-sensitive calcium-release channel activity	Biological Process	1	P42858
5	GO:0033145	positive regulation of intracellular steroid hormone receptor signaling pathway	Biological Process	1	Q15648
5	GO:0045747	positive regulation of Notch signaling pathway	Biological Process	2	P41743,Q6NW34
5	GO:0045880	positive regulation of smoothened signaling pathway	Biological Process	1	Q7Z3E5
5	GO:0046628	positive regulation of insulin receptor signaling pathway	Biological Process	3	P04899,Q96EB6,Q9Y5X3
5	GO:0051388	positive regulation of neurotrophin TRK receptor signaling pathway	Biological Process	2	Q92558,Q96F07
5	GO:0062208	positive regulation of pattern recognition receptor signaling pathway	Biological Process	1	Q7Z2W4
5	GO:0090100	positive regulation of transmembrane receptor protein serine/threonine kinase signaling pathway	Biological Process	1	Q8N1F7
5	GO:1900103	positive regulation of endoplasmic reticulum unfolded protein response	Biological Process	1	P57088
5	GO:1902533	positive regulation of intracellular signal transduction	Biological Process	27	Q02952,Q6IAA8,P19525,P49407,P57737,O15111,Q13325,Q7Z2W4,Q9NR30,Q15910,Q86VI3,Q9HAN9,O43324,Q9BUZ4,P42345,Q96EB6,P04899,P27361,Q96DX7,P29590,P61927,P61254,Q96PN6,O75569,P04637,P49848,Q38SD2
5	GO:2001235	positive regulation of apoptotic signaling pathway	Biological Process	10	P61254,Q96EB6,Q96PN6,P18847,P29590,P30153,O75569,P04637,P49848,O43324
5	GO:0001960	negative regulation of cytokine-mediated signaling pathway	Biological Process	2	Q9UIV1,Q9Y6K5
5	GO:0022401	negative adaptation of signaling pathway	Biological Process	1	P49407
5	GO:0030178	negative regulation of Wnt signaling pathway	Biological Process	1	P52952
5	GO:0033144	negative regulation of intracellular steroid hormone receptor signaling pathway	Biological Process	3	P38398,Q9P253,Q96EB6
5	GO:0034122	negative regulation of toll-like receptor signaling pathway	Biological Process	1	Q6SZW1
5	GO:0045746	negative regulation of Notch signaling pathway	Biological Process	1	P49407
5	GO:0045879	negative regulation of smoothened signaling pathway	Biological Process	1	Q9UMX1
5	GO:0046627	negative regulation of insulin receptor signaling pathway	Biological Process	3	P19338,Q92610,Q9BT40
5	GO:0048387	negative regulation of retinoic acid receptor signaling pathway	Biological Process	1	Q15910
5	GO:0090101	negative regulation of transmembrane receptor protein serine/threonine kinase signaling pathway	Biological Process	5	P04637,P11021,Q09028,Q96EB6,Q9UNH7
5	GO:1900102	negative regulation of endoplasmic reticulum unfolded protein response	Biological Process	2	O94874,P11021
5	GO:1901185	negative regulation of ERBB signaling pathway	Biological Process	2	Q9Y5X3,Q9UNH7
5	GO:1902532	negative regulation of intracellular signal transduction	Biological Process	15	Q96EB6,O14730,P42224,Q9BT40,P30153,P67775,P18847,Q96RT1,P42345,Q96QE3,Q92974,Q96K76,P27361,Q93009,Q9Y3T9
5	GO:1904893	negative regulation of receptor signaling pathway via STAT	Biological Process	2	P30153,P67775
5	GO:2001234	negative regulation of apoptotic signaling pathway	Biological Process	9	P38398,Q92974,Q96EB6,Q96QE3,Q96K76,P42858,P61289,Q9Y3T9,P04899
5	GO:0002753	cytoplasmic pattern recognition receptor signaling pathway	Biological Process	4	Q9Y6K5,O14730,Q96RT1,Q7Z2W4
5	GO:0030518	intracellular steroid hormone receptor signaling pathway	Biological Process	7	Q8TDD1,Q9UER7,O94874,P38398,Q9P253,Q15648,Q96EB6
5	GO:0035357	peroxisome proliferator activated receptor signaling pathway	Biological Process	2	Q96EB6,Q15648
5	GO:0035872	nucleotide-binding domain, leucine rich repeat containing receptor signaling pathway	Biological Process	1	Q96RT1
5	GO:0048384	retinoic acid receptor signaling pathway	Biological Process	2	Q15910,P29590
5	GO:0070561	vitamin D receptor signaling pathway	Biological Process	1	Q15648
5	GO:0036498	IRE1-mediated unfolded protein response	Biological Process	4	P11021,O94874,P57088,Q8IXB1
5	GO:0000075	cell cycle checkpoint signaling	Biological Process	17	O75419,O94874,Q96RU2,Q99459,Q9UMS4,P04637,P29590,P61254,Q13362,Q9NYZ3,P38398,Q9NXR7,P78527,Q01831,Q96AY2,Q9BXW9,Q13564
5	GO:0000165	MAPK cascade	Biological Process	19	Q9UER7,P27361,Q14596,P19525,Q15910,Q9BT40,P30153,Q6IAA8,Q86VI3,Q9HAN9,Q9BUZ4,P18847,P04899,P49407,Q02952,P01111,P10398,P62258,Q7Z569
5	GO:0007249	I-kappaB kinase/NF-kappaB signaling	Biological Process	9	O15111,O94874,Q9BUZ4,Q13325,Q7Z2W4,Q9NR30,O14730,P42224,Q96EB6
5	GO:0007264	small GTPase mediated signal transduction	Biological Process	16	P01111,P04637,Q7Z569,Q86VI3,O15111,Q13459,O94887,Q92558,Q9NYB9,Q9Y2A7,Q9Y6D5,Q92974,P49407,A7KAX9,Q86X10,Q8TER5
5	GO:0010737	protein kinase A signaling	Biological Process	2	Q02952,Q8WZ42
5	GO:0019932	second-messenger-mediated signaling	Biological Process	8	P35520,P19174,P40123,Q01518,P42345,P42858,P30153,P67775
5	GO:0031098	stress-activated protein kinase signaling cascade	Biological Process	5	Q9UER7,P27361,Q14596,P19525,Q9BUZ4
5	GO:0031929	TOR signaling	Biological Process	7	P10398,Q96EB6,Q6IAA8,P42345,P27361,Q93009,P62753
5	GO:0035329	hippo signaling	Biological Process	1	P57737
5	GO:0038061	NIK/NF-kappaB signaling	Biological Process	3	P19525,Q96DX7,O15111
5	GO:0042770	signal transduction in response to DNA damage	Biological Process	20	O94874,Q96RU2,Q99459,Q9UMS4,P04637,P29590,P61254,Q13362,Q9NYZ3,P38398,Q9NXR7,P78527,Q01831,Q96AY2,Q9BXW9,P06748,O43324,Q96EB6,P27361,Q96QE3
5	GO:0043491	protein kinase B signaling	Biological Process	6	Q12923,P42345,Q96EB6,P30153,P67775,Q9BT40
5	GO:0048017	inositol lipid-mediated signaling	Biological Process	1	P19174
5	GO:0070528	protein kinase C signaling	Biological Process	1	Q02952
5	GO:0072331	signal transduction by p53 class mediator	Biological Process	20	P04637,P29590,P61254,Q13362,Q9NYZ3,P46379,Q96EB6,Q96QE3,Q96RU2,P06748,O43324,O43159,Q9BQG0,P42345,P46087,P46777,Q14137,Q14146,Q93009,P61927
5	GO:0097193	intrinsic apoptotic signaling pathway	Biological Process	21	P29590,P38398,P78527,Q96K76,Q9UER7,P04637,P46379,Q13362,Q96EB6,Q96QE3,Q96RU2,Q8IXB1,O43159,Q9BQG0,P61254,Q92974,Q96PN6,Q9Y3T9,O75569,P49848,Q13617
5	GO:0097192	extrinsic apoptotic signaling pathway in absence of ligand	Biological Process	2	P30153,O95817
5	GO:0060391	positive regulation of SMAD protein signal transduction	Biological Process	1	Q8N1F7
5	GO:0001836	release of cytochrome c from mitochondria	Biological Process	1	P04637
5	GO:0095500	acetylcholine receptor signaling pathway	Biological Process	1	P04899
5	GO:0061762	CAMKK-AMPK signaling cascade	Biological Process	1	P42858
5	GO:0042552	myelination	Biological Process	3	P42345,Q96P11,Q13144
5	GO:0010939	regulation of necrotic cell death	Biological Process	2	Q92974,P04637
5	GO:0043067	regulation of programmed cell death	Biological Process	62	Q9Y3T9,O95817,P04637,Q96PN6,P52952,Q92845,O60216,P41743,Q96EB6,P39687,P42224,Q13564,Q92688,Q9BUZ4,Q9UER7,O43324,P42858,P49848,P62753,P78527,Q13144,Q14155,Q8WYA6,Q96IZ0,Q9NZJ7,O94874,P06748,P08243,P10398,P11021,P19525,P27635,P35520,P38646,P42345,P46379,P61247,Q15648,Q16531,Q96K76,Q9NXR7,Q6SZW1,P49588,P49917,Q9HAN9,Q9UNH7,P61081,P78362,P29590,Q92974,Q99576,Q02952,P38398,Q96QE3,P61254,P18847,Q9BQG0,…
5	GO:1901214	regulation of neuron death	Biological Process	13	Q13564,Q6SZW1,O60216,P41743,P49588,P49917,Q96EB6,Q9HAN9,Q9UNH7,P04637,P61081,P78362,Q96PN6
5	GO:1903201	regulation of oxidative stress-induced cell death	Biological Process	3	Q96IZ0,Q96EB6,Q96PN6
5	GO:0010940	positive regulation of necrotic cell death	Biological Process	1	P04637
5	GO:0043068	positive regulation of programmed cell death	Biological Process	24	P04637,Q96PN6,O43324,P42858,P49848,P62753,P78527,Q13144,Q14155,Q8WYA6,Q96EB6,Q96IZ0,Q9NZJ7,P61081,P78362,P29590,Q02952,P61254,P18847,Q9BQG0,P19174,P41743,P30153,O75569
5	GO:1901216	positive regulation of neuron death	Biological Process	4	P04637,P61081,P78362,Q96PN6
5	GO:1903209	positive regulation of oxidative stress-induced cell death	Biological Process	2	Q96IZ0,Q96PN6
5	GO:0006915	apoptotic process	Biological Process	77	P04637,Q9Y3T9,P52952,P62753,O95817,Q9H0S4,Q9UER7,Q9UKL3,P29590,P38398,P78527,Q96K76,Q92845,Q96PN6,O60216,P41743,Q96EB6,P46379,Q13362,Q96QE3,Q96RU2,P39687,P42224,Q13564,Q92688,Q9BUZ4,O43324,P42858,P49848,Q13144,Q14155,Q8WYA6,Q96IZ0,Q9NZJ7,O94874,P06748,P08243,P10398,P11021,P19525,P27635,P35520,P38646,P42345,P61247,Q15648,Q16531,Q9NXR7,Q6SZW1,P49588,P49917,Q9HAN9,Q9UNH7,P61081,P78362,Q8IXB1,Q99576,…
5	GO:0043069	negative regulation of programmed cell death	Biological Process	37	Q9Y3T9,O95817,P52952,Q92845,O60216,P41743,O94874,P04637,P06748,P08243,P10398,P11021,P19525,P27635,P35520,P38646,P42345,P46379,P61247,P62753,P78527,Q15648,Q16531,Q96EB6,Q96K76,Q9NXR7,P49588,P49917,Q9HAN9,Q9UNH7,Q92974,Q99576,P38398,Q96QE3,P04899,P42858,P61289
5	GO:0097300	programmed necrotic cell death	Biological Process	3	Q92974,P04637,Q7Z3C6
5	GO:0097468	programmed cell death in response to reactive oxygen species	Biological Process	1	Q96IZ0
5	GO:0008631	intrinsic apoptotic signaling pathway in response to oxidative stress	Biological Process	4	Q9UER7,Q96EB6,Q96PN6,P29590
5	GO:0036474	cell death in response to hydrogen peroxide	Biological Process	1	Q96IZ0
5	GO:0036475	neuron death in response to oxidative stress	Biological Process	2	Q9UER7,Q96PN6
5	GO:1903202	negative regulation of oxidative stress-induced cell death	Biological Process	1	Q96EB6
5	GO:0060547	negative regulation of necrotic cell death	Biological Process	1	Q92974
5	GO:1901215	negative regulation of neuron death	Biological Process	7	O60216,P41743,P49588,P49917,Q96EB6,Q9HAN9,Q9UNH7
5	GO:0051402	neuron apoptotic process	Biological Process	14	Q9UER7,Q13564,Q6SZW1,O60216,P41743,P49588,P49917,Q96EB6,Q9HAN9,Q9UNH7,P04637,P61081,P78362,Q96PN6
5	GO:0002053	positive regulation of mesenchymal cell proliferation	Biological Process	1	P42224
5	GO:0048146	positive regulation of fibroblast proliferation	Biological Process	2	P29590,P49917
5	GO:0048661	positive regulation of smooth muscle cell proliferation	Biological Process	2	P04899,P42224
5	GO:0050679	positive regulation of epithelial cell proliferation	Biological Process	6	P01111,Q96EB6,Q86VI3,P19174,Q15648,P52952
5	GO:0060252	positive regulation of glial cell proliferation	Biological Process	2	O94874,P41743
5	GO:0070665	positive regulation of leukocyte proliferation	Biological Process	3	Q96QE3,P30825,P27361
5	GO:2000179	positive regulation of neural precursor cell proliferation	Biological Process	1	P04899
5	GO:0033689	negative regulation of osteoblast proliferation	Biological Process	1	P19525
5	GO:0048147	negative regulation of fibroblast proliferation	Biological Process	3	P02794,P04637,Q96IZ0
5	GO:0050680	negative regulation of epithelial cell proliferation	Biological Process	2	P42224,Q15648
5	GO:0060253	negative regulation of glial cell proliferation	Biological Process	1	P04637
5	GO:0070664	negative regulation of leukocyte proliferation	Biological Process	1	Q96IZ0
5	GO:2000178	negative regulation of neural precursor cell proliferation	Biological Process	2	P04637,Q92845
5	GO:2000647	negative regulation of stem cell proliferation	Biological Process	1	P04637
5	GO:0010464	regulation of mesenchymal cell proliferation	Biological Process	1	P42224
5	GO:0072135	kidney mesenchymal cell proliferation	Biological Process	1	P42224
5	GO:0060251	regulation of glial cell proliferation	Biological Process	3	O94874,P41743,P04637
5	GO:0014855	striated muscle cell proliferation	Biological Process	1	P52952
5	GO:0048659	smooth muscle cell proliferation	Biological Process	3	P78527,P42224,P04899
5	GO:0033688	regulation of osteoblast proliferation	Biological Process	1	P19525
5	GO:0048145	regulation of fibroblast proliferation	Biological Process	5	P29590,P49917,P02794,P04637,Q96IZ0
5	GO:0048660	regulation of smooth muscle cell proliferation	Biological Process	3	P42224,P04899,P78527
5	GO:0050678	regulation of epithelial cell proliferation	Biological Process	8	P42224,P01111,Q96EB6,Q15648,Q86VI3,P52952,P19174,P78527
5	GO:0060043	regulation of cardiac muscle cell proliferation	Biological Process	1	P52952
5	GO:0070663	regulation of leukocyte proliferation	Biological Process	4	Q96IZ0,Q96QE3,P30825,P27361
5	GO:0072091	regulation of stem cell proliferation	Biological Process	2	P19525,P04637
5	GO:2000177	regulation of neural precursor cell proliferation	Biological Process	4	P04637,Q92845,P04899,Q2Q1W2
5	GO:0001935	endothelial cell proliferation	Biological Process	4	P42224,P01111,Q96EB6,P19174
5	GO:0033598	mammary gland epithelial cell proliferation	Biological Process	2	Q86VI3,Q15648
5	GO:0043616	keratinocyte proliferation	Biological Process	1	Q15648
5	GO:0072575	epithelial cell proliferation involved in liver morphogenesis	Biological Process	1	Q15648
5	GO:0007405	neuroblast proliferation	Biological Process	3	P04637,Q92845,Q92974
5	GO:0021846	cell proliferation in forebrain	Biological Process	1	Q9NZI8
5	GO:0032943	mononuclear cell proliferation	Biological Process	5	P04637,P62753,Q96IZ0,Q96QE3,P30825
5	GO:0061517	macrophage proliferation	Biological Process	1	P27361
5	GO:0071425	hematopoietic stem cell proliferation	Biological Process	3	P19525,O95376,Q15020
5	GO:0072203	cell proliferation involved in metanephros development	Biological Process	1	P42224
5	GO:0061387	regulation of extent of cell growth	Biological Process	1	Q96PN6
5	GO:0045773	positive regulation of axon extension	Biological Process	1	Q96PN6
5	GO:1990138	neuron projection extension	Biological Process	4	Q96PN6,Q92558,Q96F07,Q9GZM8
5	GO:0001678	cellular glucose homeostasis	Biological Process	3	P62760,Q96RR1,Q96EB6
5	GO:0006873	cellular ion homeostasis	Biological Process	11	P02792,P02794,Q9UI12,P29590,Q6P4Q7,P27361,P42858,Q9H2V7,P19174,P62258,Q8WWC4
5	GO:0035356	cellular triglyceride homeostasis	Biological Process	1	Q96EB6
5	GO:0097401	synaptic vesicle lumen acidification	Biological Process	1	Q9UI12
5	GO:0032465	regulation of cytokinesis	Biological Process	1	Q96Q89
5	GO:0032467	positive regulation of cytokinesis	Biological Process	1	Q96Q89
5	GO:0061640	cytoskeleton-dependent cytokinesis	Biological Process	4	Q9BXS6,Q96Q89,Q86VI3,Q16181
5	GO:0007052	mitotic spindle organization	Biological Process	4	Q08379,Q15813,Q66K74,Q9H3R5
5	GO:0030953	astral microtubule organization	Biological Process	1	Q5VU43
5	GO:0051225	spindle assembly	Biological Process	7	Q16531,Q08379,Q8TD08,O94927,P07437,Q7Z4H7,Q9BT25
5	GO:0090224	regulation of spindle organization	Biological Process	1	Q8TD08
5	GO:0007063	regulation of sister chromatid cohesion	Biological Process	3	O75367,O60216,P49711
5	GO:0007064	mitotic sister chromatid cohesion	Biological Process	4	O60216,O75367,Q56NI9,Q9NTI5
5	GO:0045876	positive regulation of sister chromatid cohesion	Biological Process	2	O75367,O60216
5	GO:0051177	meiotic sister chromatid cohesion	Biological Process	2	O60216,P30153
5	GO:0070601	centromeric sister chromatid cohesion	Biological Process	2	P30153,P49711
5	GO:0046606	negative regulation of centrosome cycle	Biological Process	2	P06748,P38398
5	GO:0046599	regulation of centriole replication	Biological Process	2	P38398,P06748
5	GO:0046600	negative regulation of centriole replication	Biological Process	1	P38398
5	GO:0051315	attachment of mitotic spindle microtubules to kinetochore	Biological Process	1	Q96EB6
5	GO:0051988	regulation of attachment of spindle microtubules to kinetochore	Biological Process	1	Q96EB6
5	GO:0007088	regulation of mitotic nuclear division	Biological Process	7	Q9BXS6,O60216,Q13042,Q9UJX2,Q9UJX3,Q9UJX4,Q96Q89
5	GO:0032954	regulation of cytokinetic process	Biological Process	1	Q96Q89
5	GO:0070316	regulation of G0 to G1 transition	Biological Process	2	Q15648,Q86U86
5	GO:0090235	regulation of metaphase plate congression	Biological Process	1	Q96EB6
5	GO:1901987	regulation of cell cycle phase transition	Biological Process	36	O75419,O94874,Q96RU2,Q99459,Q9UMS4,P04637,P29590,P61254,Q13362,Q9NYZ3,P38398,Q9NXR7,Q9UJX2,O60216,Q96K76,Q86U86,Q9UJX5,P78527,Q01831,Q96AY2,Q9BXW9,Q13564,Q13042,Q9UJX3,Q9UJX4,O43660,Q7L2J0,Q16531,Q96QE3,O75367,P06748,Q15910,Q8TD08,P50613,P61289,P67775
5	GO:1903379	regulation of mitotic chromosome condensation	Biological Process	1	O60264
5	GO:1903450	regulation of G1 to G0 transition	Biological Process	3	P04637,O43159,Q9BQG0
5	GO:0045839	negative regulation of mitotic nuclear division	Biological Process	1	O60216
5	GO:1901988	negative regulation of cell cycle phase transition	Biological Process	21	O75419,O94874,Q96RU2,Q99459,Q9UMS4,P04637,P29590,P61254,Q13362,Q9NYZ3,P38398,Q9NXR7,O60216,Q96K76,P78527,Q01831,Q96AY2,Q9BXW9,Q13564,O75367,Q15910
5	GO:1903451	negative regulation of G1 to G0 transition	Biological Process	1	P04637
5	GO:1905213	negative regulation of mitotic chromosome condensation	Biological Process	1	O60264
5	GO:0000912	assembly of actomyosin apparatus involved in cytokinesis	Biological Process	1	Q86VI3
5	GO:1902410	mitotic cytokinetic process	Biological Process	2	Q96Q89,Q86VI3
5	GO:0034087	establishment of mitotic sister chromatid cohesion	Biological Process	1	O60216
5	GO:0034088	maintenance of mitotic sister chromatid cohesion	Biological Process	1	O75367
5	GO:0034091	regulation of maintenance of sister chromatid cohesion	Biological Process	1	O75367
5	GO:0034093	positive regulation of maintenance of sister chromatid cohesion	Biological Process	1	O75367
5	GO:0044772	mitotic cell cycle phase transition	Biological Process	33	O00743,P62753,Q13617,Q15910,Q2Q1W2,Q86VI3,Q07002,P04637,P29590,P61254,Q13362,Q9NYZ3,Q9UJX2,P38398,Q9NXR7,P83731,O60216,Q96K76,Q86U86,Q9UJX5,P78527,Q13564,Q13042,Q9UJX3,Q9UJX4,O43660,Q7L2J0,Q01831,Q16531,Q96QE3,P50613,P61289,P67775
5	GO:0044784	metaphase/anaphase transition of cell cycle	Biological Process	8	Q9UJX2,Q86U86,Q9UJX5,O60216,Q13042,Q9UJX3,Q9UJX4,Q8TD08
5	GO:0044839	cell cycle G2/M phase transition	Biological Process	9	P38398,Q9NXR7,O60216,Q96K76,Q13564,P04637,O75367,P06748,Q96QE3
5	GO:0044843	cell cycle G1/S phase transition	Biological Process	19	O00743,P62753,Q13617,Q15910,Q2Q1W2,Q86VI3,Q07002,P04637,P29590,P61254,Q13362,Q9NYZ3,P78527,O43660,Q7L2J0,P50613,P61289,P67775,Q86U86
5	GO:1901989	positive regulation of cell cycle phase transition	Biological Process	10	Q13042,Q9UJX2,Q9UJX3,Q9UJX4,O43660,Q7L2J0,P06748,Q96QE3,Q15910,Q8TD08
5	GO:0033260	nuclear DNA replication	Biological Process	5	P49736,Q9BRX5,O75419,Q14691,Q96QE3
5	GO:0000915	actomyosin contractile ring assembly	Biological Process	1	Q86VI3
5	GO:0070318	positive regulation of G0 to G1 transition	Biological Process	1	Q15648
5	GO:0010824	regulation of centrosome duplication	Biological Process	5	P06748,P38398,O14980,Q96EB6,Q9H0A0
5	GO:0010825	positive regulation of centrosome duplication	Biological Process	1	P06748
5	GO:0010826	negative regulation of centrosome duplication	Biological Process	2	P38398,P06748
5	GO:0007100	mitotic centrosome separation	Biological Process	1	Q9GZM8
5	GO:0007080	mitotic metaphase plate congression	Biological Process	4	Q96EB6,Q14807,Q8NI77,Q9UJX2
5	GO:0051728	cell cycle switching, mitotic to meiotic cell cycle	Biological Process	1	Q9H6S0
5	GO:1902977	mitotic DNA replication preinitiation complex assembly	Biological Process	1	O75419
5	GO:0045840	positive regulation of mitotic nuclear division	Biological Process	5	Q13042,Q9UJX2,Q9UJX3,Q9UJX4,Q9BXS6
5	GO:1905832	positive regulation of spindle assembly	Biological Process	1	Q8TD08
5	GO:1902315	nuclear cell cycle DNA replication initiation	Biological Process	2	P49736,Q9BRX5
5	GO:1902319	DNA strand elongation involved in nuclear cell cycle DNA replication	Biological Process	1	Q14691
5	GO:0000070	mitotic sister chromatid segregation	Biological Process	18	Q56NI9,Q9NTI5,Q8WZ42,Q9BXS6,Q14807,Q8NI77,Q9UJX2,Q86U86,Q9UJX5,O60216,O75367,Q13042,Q9UJX3,Q9UJX4,P30153,Q96EB6,O60264,Q86XI2
5	GO:0000083	regulation of transcription involved in G1/S transition of mitotic cell cycle	Biological Process	1	Q07002
5	GO:0000281	mitotic cytokinesis	Biological Process	3	Q96Q89,Q86VI3,Q9BXS6
5	GO:0007076	mitotic chromosome condensation	Biological Process	3	O60264,Q8WZ42,Q9BXS6
5	GO:0007093	mitotic cell cycle checkpoint signaling	Biological Process	12	P04637,P29590,P61254,Q13362,Q9NYZ3,P38398,Q9NXR7,P78527,Q01831,Q96AY2,Q9BXW9,Q13564
5	GO:0140014	mitotic nuclear division	Biological Process	22	Q86XI2,Q8NI77,Q9BXS6,Q56NI9,Q9NTI5,Q8WZ42,Q14807,Q9UJX2,Q96Q89,Q9GZM8,P83731,Q86U86,Q9UJX5,O60216,O75367,Q13042,Q9UJX3,Q9UJX4,P30153,Q08379,Q96EB6,O60264
5	GO:1902969	mitotic DNA replication	Biological Process	4	P49736,Q9BRX5,O75419,Q14691
5	GO:1902975	mitotic DNA replication initiation	Biological Process	2	P49736,Q9BRX5
5	GO:1902983	DNA strand elongation involved in mitotic DNA replication	Biological Process	1	Q14691
5	GO:1903479	mitotic actomyosin contractile ring assembly actin filament organization	Biological Process	1	Q86VI3
5	GO:0048278	vesicle docking	Biological Process	2	O15498,Q9P253
5	GO:0007286	spermatid development	Biological Process	6	Q96SB4,Q96PN6,Q96SI9,Q9H6S0,Q9UMX1,Q9Y2H6
5	GO:0048477	oogenesis	Biological Process	5	Q5TAX3,P62753,Q9H6S0,P30153,Q9Y4F3
5	GO:0048599	oocyte development	Biological Process	3	Q5TAX3,P30153,Q9H6S0
5	GO:0007015	actin filament organization	Biological Process	20	Q9NYB9,P57737,Q92558,Q8WZ42,Q96F07,P42345,Q9Y2A7,Q9NQA3,Q2M389,P49407,Q96IZ0,Q9Y613,Q08722,Q9BT40,Q86VI3,O00160,P40123,P41743,Q01518,Q92974
5	GO:0030866	cortical actin cytoskeleton organization	Biological Process	5	Q86VI3,A0A0A0MRA8,P11171,Q9Y2A7,Q9Y613
5	GO:0031032	actomyosin structure organization	Biological Process	9	Q8WZ42,P49407,Q9Y613,P42345,Q08722,Q9BT40,P52952,Q86VI3,P11171
5	GO:0031033	myosin filament organization	Biological Process	1	Q8WZ42
5	GO:0032956	regulation of actin cytoskeleton organization	Biological Process	10	Q96F07,P42345,Q9Y2A7,Q2M389,Q9NQA3,Q9Y613,Q08722,Q9BT40,Q92558,Q9NYB9
5	GO:0099140	presynaptic actin cytoskeleton organization	Biological Process	1	P40123
5	GO:0010525	regulation of transposition, RNA-mediated	Biological Process	2	Q9HCE1,Q9NRW3
5	GO:0010526	negative regulation of transposition, RNA-mediated	Biological Process	2	Q9HCE1,Q9NRW3
5	GO:0032438	melanosome organization	Biological Process	6	O43747,Q92572,P78537,Q8TDH9,Q96EV8,Q9NUP1
5	GO:0032400	melanosome localization	Biological Process	1	Q8TDH9
5	GO:0051904	pigment granule transport	Biological Process	1	Q8TDH9
5	GO:0051905	establishment of pigment granule localization	Biological Process	1	Q8TDH9
5	GO:0045109	intermediate filament organization	Biological Process	1	Q7Z3Y8
5	GO:0060052	neurofilament cytoskeleton organization	Biological Process	1	Q9GZM8
5	GO:0051281	positive regulation of release of sequestered calcium ion into cytosol	Biological Process	2	P42858,P19174
5	GO:0046824	positive regulation of nucleocytoplasmic transport	Biological Process	3	O95817,P62258,Q92688
5	GO:0090316	positive regulation of intracellular protein transport	Biological Process	6	O95817,P62258,Q92688,O95376,Q96PN6,Q96Q89
5	GO:0010828	positive regulation of glucose transmembrane transport	Biological Process	1	P41743
5	GO:0034767	positive regulation of ion transmembrane transport	Biological Process	3	P42858,P19174,Q9H2H9
5	GO:0031334	positive regulation of protein-containing complex assembly	Biological Process	6	P42345,Q9Y2A7,P04637,Q5VU43,P67775,Q9NVN8
5	GO:0032233	positive regulation of actin filament bundle assembly	Biological Process	3	P42345,Q08722,Q9Y613
5	GO:0120034	positive regulation of plasma membrane bounded cell projection assembly	Biological Process	6	P42345,Q9NYB9,Q9Y2A7,P42858,Q9GZM8,Q16181
5	GO:1902117	positive regulation of organelle assembly	Biological Process	5	Q504Q3,P42858,Q16181,Q8TD08,Q15042
5	GO:0010720	positive regulation of cell development	Biological Process	8	Q96PN6,P42345,P49917,Q96T58,O94874,P41743,Q14155,P78527
5	GO:0030858	positive regulation of epithelial cell differentiation	Biological Process	3	O75367,Q15648,O95373
5	GO:0045639	positive regulation of myeloid cell differentiation	Biological Process	3	P42224,P78527,Q15648
5	GO:0045663	positive regulation of myoblast differentiation	Biological Process	1	Q86U86
5	GO:0045666	positive regulation of neuron differentiation	Biological Process	2	P52952,Q92974
5	GO:0051149	positive regulation of muscle cell differentiation	Biological Process	2	P42345,Q96EB6
5	GO:1903226	positive regulation of endodermal cell differentiation	Biological Process	1	O75367
5	GO:2000738	positive regulation of stem cell differentiation	Biological Process	2	P52952,Q13610
5	GO:0010638	positive regulation of organelle organization	Biological Process	33	Q504Q3,P42345,Q9Y2A7,P29590,Q9BVP2,P17987,P27361,P40227,P49368,P50990,P50991,P78371,Q8TD08,Q99832,O75367,P42858,Q9BXS6,Q13042,Q9UJX2,Q9UJX3,Q9UJX4,O60216,Q08722,Q9Y613,Q5VU43,P04637,Q9BQS8,Q16181,Q15042,Q86XI2,Q92558,Q9NYB9,P49917
5	GO:0031346	positive regulation of cell projection organization	Biological Process	10	P42345,Q9NYB9,Q9Y2A7,P41743,P42858,Q96PN6,Q15910,Q9GZM8,Q16181,Q14155
5	GO:0043243	positive regulation of protein-containing complex disassembly	Biological Process	1	Q9BQS8
5	GO:1902905	positive regulation of supramolecular fiber organization	Biological Process	7	P42345,Q9Y2A7,Q08722,Q9Y613,Q5VU43,Q92558,Q9NYB9
5	GO:0042307	positive regulation of protein import into nucleus	Biological Process	1	O95817
5	GO:1904751	positive regulation of protein localization to nucleolus	Biological Process	1	P06748
5	GO:1904871	positive regulation of protein localization to Cajal body	Biological Process	9	P17987,P40227,P49368,P50990,P50991,P78371,Q4G0J3,Q7L2J0,Q99832
5	GO:0001956	positive regulation of neurotransmitter secretion	Biological Process	2	Q15042,Q96EV8
5	GO:0014049	positive regulation of glutamate secretion	Biological Process	2	Q15042,Q96EV8
5	GO:0045921	positive regulation of exocytosis	Biological Process	2	O43747,P62760
5	GO:0050714	positive regulation of protein secretion	Biological Process	2	P62760,Q8WZ42
5	GO:1903955	positive regulation of protein targeting to mitochondrion	Biological Process	2	O95376,Q96PN6
5	GO:1903078	positive regulation of protein localization to plasma membrane	Biological Process	2	O95573,P41743
5	GO:1904778	positive regulation of protein localization to cell cortex	Biological Process	1	P11171
5	GO:1904851	positive regulation of establishment of protein localization to telomere	Biological Process	7	P17987,P40227,P49368,P50990,P50991,P78371,Q99832
5	GO:1902237	positive regulation of endoplasmic reticulum stress-induced intrinsic apoptotic signaling pathway	Biological Process	1	Q96EB6
5	GO:1904294	positive regulation of ERAD pathway	Biological Process	1	P46379
5	GO:0043517	positive regulation of DNA damage response, signal transduction by p53 class mediator	Biological Process	2	P61254,O43324
5	GO:0045739	positive regulation of DNA repair	Biological Process	6	Q86U86,Q96EB6,P78527,Q02880,P38398,Q9NXR7
5	GO:1902231	positive regulation of intrinsic apoptotic signaling pathway in response to DNA damage	Biological Process	1	P61254
5	GO:0046823	negative regulation of nucleocytoplasmic transport	Biological Process	1	Q9UMX1
5	GO:0090317	negative regulation of intracellular protein transport	Biological Process	2	Q9UMX1,Q9BT40
5	GO:0010829	negative regulation of glucose transmembrane transport	Biological Process	1	Q9BT40
5	GO:0034766	negative regulation of ion transmembrane transport	Biological Process	1	P62258
5	GO:0010721	negative regulation of cell development	Biological Process	3	P04637,Q92845,Q9BPU6
5	GO:0030857	negative regulation of epithelial cell differentiation	Biological Process	2	P42224,Q15910
5	GO:0045599	negative regulation of fat cell differentiation	Biological Process	1	Q96EB6
5	GO:0045638	negative regulation of myeloid cell differentiation	Biological Process	1	P38646
5	GO:0045665	negative regulation of neuron differentiation	Biological Process	2	Q15648,Q6NW34
5	GO:0045668	negative regulation of osteoblast differentiation	Biological Process	3	O95373,Q14596,Q9UMX1
5	GO:0051148	negative regulation of muscle cell differentiation	Biological Process	2	P52952,Q15910
5	GO:1901533	negative regulation of hematopoietic progenitor cell differentiation	Biological Process	1	P38646
5	GO:2000737	negative regulation of stem cell differentiation	Biological Process	2	P38646,Q15910
5	GO:0010639	negative regulation of organelle organization	Biological Process	15	Q92974,P06748,Q9BTW9,P29590,Q01780,Q8NDF8,Q9H0A0,Q9NVN8,O60216,P38398,Q9BT40,P04637,O60264,P42345,Q14155
5	GO:0031333	negative regulation of protein-containing complex assembly	Biological Process	6	Q9BTW9,P11142,P40429,Q14155,O14730,P11021
5	GO:0031345	negative regulation of cell projection organization	Biological Process	2	Q9BPU6,Q96EV8
5	GO:0043242	negative regulation of protein-containing complex disassembly	Biological Process	1	Q92974
5	GO:1901889	negative regulation of cell junction assembly	Biological Process	1	Q12923
5	GO:1902904	negative regulation of supramolecular fiber organization	Biological Process	5	Q92974,Q9BTW9,Q9BT40,Q14155,P11142
5	GO:1905809	negative regulation of synapse organization	Biological Process	1	Q12923
5	GO:0051209	release of sequestered calcium ion into cytosol	Biological Process	2	P42858,P19174
5	GO:0042308	negative regulation of protein import into nucleus	Biological Process	1	Q9UMX1
5	GO:0014050	negative regulation of glutamate secretion	Biological Process	1	Q14831
5	GO:0045920	negative regulation of exocytosis	Biological Process	1	P04899
5	GO:0050709	negative regulation of protein secretion	Biological Process	1	P62760
5	GO:0090315	negative regulation of protein targeting to membrane	Biological Process	1	Q9BT40
5	GO:0043518	negative regulation of DNA damage response, signal transduction by p53 class mediator	Biological Process	1	Q96EB6
5	GO:1902230	negative regulation of intrinsic apoptotic signaling pathway in response to DNA damage	Biological Process	3	Q96EB6,Q96QE3,Q96K76
5	GO:0042659	regulation of cell fate specification	Biological Process	1	Q09028
5	GO:0048665	neuron fate specification	Biological Process	1	Q9UMX1
5	GO:0060573	cell fate specification involved in pattern specification	Biological Process	1	Q9UMX1
5	GO:0001570	vasculogenesis	Biological Process	1	P52952
5	GO:0001826	inner cell mass cell differentiation	Biological Process	1	Q9NVX2
5	GO:0002062	chondrocyte differentiation	Biological Process	1	Q15582
5	GO:0002244	hematopoietic progenitor cell differentiation	Biological Process	8	P49917,P78527,O94874,P04637,Q15648,P19525,P38646,Q56NI9
5	GO:0002521	leukocyte differentiation	Biological Process	16	P42345,P04637,P78527,Q02880,Q15910,Q9Y4B6,Q6IAN0,Q15648,Q96EB6,O94887,P49917,P62753,Q38SD2,Q86U86,Q9BXW9,P35268
5	GO:0010001	glial cell differentiation	Biological Process	6	Q13144,Q14232,Q96P11,P42345,Q15022,P27361
5	GO:0021515	cell differentiation in spinal cord	Biological Process	1	Q9UMX1
5	GO:0022008	neurogenesis	Biological Process	50	P62258,Q02880,Q8NAT1,Q9P0L2,P04637,Q92845,P78559,Q66K74,Q8TER5,Q96F07,Q9BPU6,Q9GZM8,P41743,Q13144,Q14232,Q96P11,Q15910,O94887,Q9UMX1,O60941,O95573,P28370,Q99707,P78537,Q8TDH9,Q96EV8,Q9NUP1,P83731,Q9NZJ7,Q15648,Q6NW34,P52952,Q92974,Q96PN6,Q9BTW9,P42345,Q15022,Q96Q89,Q9Y2A7,Q6SZW1,Q15813,P49917,Q96T58,P27361,O94874,Q9NYB9,Q14831,Q92558,Q9NZI8,Q9HCE1
5	GO:0030099	myeloid cell differentiation	Biological Process	15	O94874,P38646,Q15758,Q86XI2,Q6IAN0,Q15648,Q96EB6,O94887,Q38SD2,Q96QR8,P42224,P78527,P42345,P62753,P29590
5	GO:0030182	neuron differentiation	Biological Process	37	P78559,Q02880,Q66K74,Q8TER5,Q96F07,Q9BPU6,Q9GZM8,Q9P0L2,P41743,O94887,Q9UMX1,Q99707,P78537,Q8TDH9,Q96EV8,Q9NUP1,P83731,Q9NZJ7,Q15648,Q6NW34,P52952,Q92974,Q96PN6,Q9BTW9,Q96Q89,Q9Y2A7,Q6SZW1,Q15813,Q9NYB9,Q14831,Q92558,Q9NZI8,Q9HCE1,Q15910,O60941,O95573,P28370
5	GO:0030855	epithelial cell differentiation	Biological Process	13	P42224,Q15648,Q15910,O75367,Q9Y2H6,Q9NYB9,P07437,Q2TB10,O95373,P50416,P52952,Q16762,Q7Z3Y8
5	GO:0035051	cardiocyte differentiation	Biological Process	5	P52952,Q8WZ42,P11310,P42345,P27361
5	GO:0035914	skeletal muscle cell differentiation	Biological Process	1	P18847
5	GO:0035987	endodermal cell differentiation	Biological Process	1	O75367
5	GO:0042692	muscle cell differentiation	Biological Process	7	P52952,P42345,Q8WZ42,O15111,Q96EB6,Q15910,P11310
5	GO:0045444	fat cell differentiation	Biological Process	3	Q96EB6,Q6IAN0,Q15648
5	GO:0045445	myoblast differentiation	Biological Process	2	Q86U86,P01111
5	GO:0048762	mesenchymal cell differentiation	Biological Process	9	P42345,Q15910,P67775,Q9P0L2,Q13428,Q9H9Y6,P27361,P42224,Q9NTW7
5	GO:0048863	stem cell differentiation	Biological Process	13	Q13428,P52952,O94874,P04637,Q15648,P27361,P19525,P78527,P38646,Q09028,Q15910,Q13610,Q9Y483
5	GO:0061005	cell differentiation involved in kidney development	Biological Process	1	P42224
5	GO:0090077	foam cell differentiation	Biological Process	1	P42224
5	GO:0032990	cell part morphogenesis	Biological Process	22	P78559,Q02880,Q66K74,Q8TER5,Q96F07,Q9BPU6,Q9GZM8,P83731,Q96PN6,Q96EV8,Q96Q89,Q9Y2A7,Q6SZW1,Q15813,Q9NYB9,Q92558,O60749,Q13459,Q13596,Q9NZI8,Q9HCE1,Q14155
5	GO:0002326	B cell lineage commitment	Biological Process	2	P04637,P78527
5	GO:0002360	T cell lineage commitment	Biological Process	3	P42345,P04637,P78527
5	GO:0042693	muscle cell fate commitment	Biological Process	1	P52952
5	GO:0048663	neuron fate commitment	Biological Process	1	Q9UMX1
5	GO:0055059	asymmetric neuroblast division	Biological Process	1	Q92974
5	GO:0060911	cardiac cell fate commitment	Biological Process	1	P52952
5	GO:0000904	cell morphogenesis involved in differentiation	Biological Process	17	P78559,Q02880,Q66K74,Q8TER5,Q96F07,Q9BPU6,Q9GZM8,P83731,Q96PN6,Q9BTW9,Q96EV8,Q6SZW1,Q15813,Q9NYB9,Q9NZI8,Q14155,P78527
5	GO:0002064	epithelial cell development	Biological Process	2	Q9Y2H6,Q9NYB9
5	GO:0014031	mesenchymal cell development	Biological Process	2	Q13428,P27361
5	GO:0021782	glial cell development	Biological Process	3	Q13144,Q14232,Q96P11
5	GO:0048666	neuron development	Biological Process	29	P78559,Q02880,Q66K74,Q8TER5,Q96F07,Q9BPU6,Q9GZM8,Q9P0L2,P41743,O94887,Q99707,P78537,Q8TDH9,Q96EV8,Q9NUP1,P83731,Q9NZJ7,Q96PN6,Q9BTW9,Q96Q89,Q9Y2A7,Q6SZW1,Q15813,Q9NYB9,Q14831,Q92558,Q9NZI8,Q9HCE1,Q15910
5	GO:0048864	stem cell development	Biological Process	2	Q13428,P27361
5	GO:0055001	muscle cell development	Biological Process	3	Q8WZ42,P52952,P42345
5	GO:0055006	cardiac cell development	Biological Process	3	Q8WZ42,P52952,P42345
5	GO:0060284	regulation of cell development	Biological Process	12	P04637,Q92845,Q15910,Q96PN6,P42345,P49917,Q96T58,Q9BPU6,O94874,P41743,Q14155,P78527
5	GO:0061515	myeloid cell development	Biological Process	3	Q15648,Q38SD2,P62753
5	GO:0098751	bone cell development	Biological Process	2	Q15648,Q38SD2
5	GO:0042551	neuron maturation	Biological Process	2	O94887,Q9NZJ7
5	GO:0051900	regulation of mitochondrial depolarization	Biological Process	1	Q96PN6
5	GO:0010827	regulation of glucose transmembrane transport	Biological Process	2	Q9BT40,P41743
5	GO:0022898	regulation of transmembrane transporter activity	Biological Process	2	P42858,P62258
5	GO:0034765	regulation of ion transmembrane transport	Biological Process	4	P42858,P19174,P62258,Q9H2H9
5	GO:1903789	regulation of amino acid transmembrane transport	Biological Process	1	Q9H2H9
5	GO:0010847	regulation of chromatin assembly	Biological Process	1	Q9NRL2
5	GO:0032231	regulation of actin filament bundle assembly	Biological Process	4	Q9Y613,P42345,Q08722,Q9BT40
5	GO:0043254	regulation of protein-containing complex assembly	Biological Process	22	Q8TD08,Q9HCU5,O94927,Q7Z4H7,Q9BT25,Q96F07,P42345,Q9Y2A7,Q9BTW9,O14730,P11021,Q9NVN8,O94887,P49754,Q9P253,P04637,Q5VU43,P19525,P11142,P67775,P40429,Q14155
5	GO:0060491	regulation of cell projection assembly	Biological Process	7	P42345,Q9NYB9,Q9Y2A7,P42858,Q9GZM8,Q8TD08,Q16181
5	GO:1901888	regulation of cell junction assembly	Biological Process	1	Q12923
5	GO:1902115	regulation of organelle assembly	Biological Process	8	Q504Q3,P42858,P06748,P38398,Q8TD08,Q16181,P42345,Q15042
5	GO:0010717	regulation of epithelial to mesenchymal transition	Biological Process	4	P42345,Q15910,P67775,Q9P0L2
5	GO:0030856	regulation of epithelial cell differentiation	Biological Process	5	P42224,Q15910,O75367,Q15648,O95373
5	GO:0045598	regulation of fat cell differentiation	Biological Process	1	Q96EB6
5	GO:0045661	regulation of myoblast differentiation	Biological Process	1	Q86U86
5	GO:0045664	regulation of neuron differentiation	Biological Process	4	Q15648,Q6NW34,P52952,Q92974
5	GO:0045667	regulation of osteoblast differentiation	Biological Process	3	O95373,Q14596,Q9UMX1
5	GO:0045685	regulation of glial cell differentiation	Biological Process	1	P42345
5	GO:0050932	regulation of pigment cell differentiation	Biological Process	1	Q8TDH9
5	GO:0051147	regulation of muscle cell differentiation	Biological Process	4	P42345,P52952,Q96EB6,Q15910
5	GO:1901532	regulation of hematopoietic progenitor cell differentiation	Biological Process	3	P19525,P78527,P38646
5	GO:1903224	regulation of endodermal cell differentiation	Biological Process	1	O75367
5	GO:1905207	regulation of cardiocyte differentiation	Biological Process	1	P52952
5	GO:2000736	regulation of stem cell differentiation	Biological Process	7	P52952,P19525,P78527,P38646,Q15910,Q13610,Q09028
5	GO:0030100	regulation of endocytosis	Biological Process	6	Q9UL63,P49407,Q8NBU5,Q96EV8,Q9UKS6,Q75N03
5	GO:0031344	regulation of cell projection organization	Biological Process	16	P42345,Q9NYB9,Q9Y2A7,Q9GZM8,Q9P0L2,P41743,P42858,Q96PN6,Q6SZW1,Q9BPU6,Q96EV8,Q9HCE1,Q15910,Q8TD08,Q16181,Q14155
5	GO:0033043	regulation of organelle organization	Biological Process	64	Q8TD08,Q9HCU5,Q92974,Q96Q89,Q9UJX2,Q504Q3,P06748,O94927,Q7Z4H7,Q9BT25,Q86U86,Q9UJX5,Q96F07,P42345,Q9Y2A7,Q96BD8,P78559,Q66K74,Q9BTW9,P29590,Q9BVP2,Q01780,Q8NDF8,Q9H0A0,Q9NVN8,P17987,P27361,P40227,P49368,P50990,P50991,P78371,Q99832,O75367,Q2M389,Q9NQA3,P42858,Q9BXS6,O60216,Q13042,Q9UJX3,Q9UJX4,P38398,Q9Y613,Q08722,Q9BT40,Q8NI77,P49711,Q5VU43,P04637,Q9BQS8,Q96PN6,Q96EB6,Q16181,P57088,Q15042,Q93009,…
5	GO:0043244	regulation of protein-containing complex disassembly	Biological Process	4	Q92974,P78559,Q66K74,Q9BQS8
5	GO:0050807	regulation of synapse organization	Biological Process	5	Q9NYB9,Q96EV8,P11142,Q12923,P07437
5	GO:1902275	regulation of chromatin organization	Biological Process	1	Q9NRL2
5	GO:1902903	regulation of supramolecular fiber organization	Biological Process	20	Q92974,O94927,Q7Z4H7,Q9BT25,Q96F07,P42345,Q9Y2A7,P78559,Q66K74,Q9BTW9,Q2M389,Q9NQA3,Q9Y613,Q08722,Q9BT40,Q5VU43,P11142,Q14155,Q92558,Q9NYB9
5	GO:0051279	regulation of release of sequestered calcium ion into cytosol	Biological Process	2	P42858,P19174
5	GO:0032386	regulation of intracellular transport	Biological Process	14	Q8TD08,Q9HCU5,Q9GZM8,O95817,Q9UMX1,O14980,P62258,Q92688,Q9BT40,Q96Q89,O95376,Q96PN6,Q93009,P27361
5	GO:0061178	regulation of insulin secretion involved in cellular response to glucose stimulus	Biological Process	1	P62760
5	GO:0070202	regulation of establishment of protein localization to chromosome	Biological Process	7	P17987,P40227,P49368,P50990,P50991,P78371,Q99832
5	GO:0150031	regulation of protein localization to lysosome	Biological Process	1	Q6IAA8
5	GO:1900180	regulation of protein localization to nucleus	Biological Process	15	O95817,Q9UMX1,P42345,O95373,P15104,P06748,P17987,P40227,P49368,P50990,P50991,P78371,Q4G0J3,Q7L2J0,Q99832
5	GO:1902816	regulation of protein localization to microtubule	Biological Process	1	P78559
5	GO:1903747	regulation of establishment of protein localization to mitochondrion	Biological Process	2	O95376,Q96PN6
5	GO:1904375	regulation of protein localization to cell periphery	Biological Process	3	O95573,P41743,P11171
5	GO:1904814	regulation of protein localization to chromosome, telomeric region	Biological Process	11	O75367,P29590,Q9BVP2,Q9NVN8,P17987,P40227,P49368,P50990,P50991,P78371,Q99832
5	GO:1905475	regulation of protein localization to membrane	Biological Process	3	O95573,Q9BT40,P41743
5	GO:2000008	regulation of protein localization to cell surface	Biological Process	1	P78559
5	GO:0017157	regulation of exocytosis	Biological Process	7	O43747,P62760,P04899,Q15042,Q4J6C6,Q96EV8,Q9P253
5	GO:0042996	regulation of Golgi to plasma membrane protein transport	Biological Process	1	O95573
5	GO:0050764	regulation of phagocytosis	Biological Process	1	Q08722
5	GO:0060628	regulation of ER to Golgi vesicle-mediated transport	Biological Process	2	Q8TD08,Q9HCU5
5	GO:1905279	regulation of retrograde transport, endosome to Golgi	Biological Process	1	Q93009
5	GO:2000641	regulation of early endosome to late endosome transport	Biological Process	1	P27361
5	GO:0060735	regulation of eIF2 alpha phosphorylation by dsRNA	Biological Process	1	P06748
5	GO:0070302	regulation of stress-activated protein kinase signaling cascade	Biological Process	4	P27361,Q14596,P19525,Q9BUZ4
5	GO:0106049	regulation of cellular response to osmotic stress	Biological Process	1	Q92974
5	GO:1900034	regulation of cellular response to heat	Biological Process	2	P42345,Q96EB6
5	GO:1900407	regulation of cellular response to oxidative stress	Biological Process	3	Q96IZ0,Q96EB6,Q96PN6
5	GO:1905089	regulation of parkin-mediated stimulation of mitophagy in response to mitochondrial depolarization	Biological Process	1	Q709C8
5	GO:1905897	regulation of response to endoplasmic reticulum stress	Biological Process	5	Q96EB6,P11021,O94874,P57088,P46379
5	GO:2001020	regulation of response to DNA damage stimulus	Biological Process	16	P38398,P49848,Q9NXR7,P04637,P06748,O43324,Q96EB6,P61254,Q96QE3,Q96K76,P29590,P35659,Q86U86,O96028,P78527,Q02880
5	GO:1903844	regulation of cellular response to transforming growth factor beta stimulus	Biological Process	5	P04637,P11021,Q09028,Q96EB6,Q9UNH7
5	GO:0014048	regulation of glutamate secretion	Biological Process	3	Q14831,Q15042,Q96EV8
5	GO:0046928	regulation of neurotransmitter secretion	Biological Process	4	Q96EV8,Q15042,Q4J6C6,Q9P253
5	GO:0050433	regulation of catecholamine secretion	Biological Process	1	Q96EV8
5	GO:0050708	regulation of protein secretion	Biological Process	3	P62760,Q8WZ42,P50416
5	GO:0006839	mitochondrial transport	Biological Process	8	Q99797,P50416,Q8WWC4,P04637,Q9NZJ7,O95376,Q96PN6,Q9UJS0
5	GO:0006886	intracellular protein transport	Biological Process	56	P29590,P62258,Q96RT1,Q9UID3,O15397,O60518,O95373,P04637,P52292,Q15648,Q8N1F7,Q96P70,Q9BW27,Q9UI26,Q9Y5L0,O14980,P38646,Q9UIA9,O60725,P41743,P09132,P37108,P49458,P46379,P49754,Q709C8,O43933,Q99797,Q96CS3,P11021,Q9HCU5,Q8WWC4,Q9GZM8,O95817,Q9UMX1,Q9NZJ7,Q92688,P11142,Q9BT40,Q96Q89,P78559,O95376,Q96PN6,Q8TCT9,O43592,O43747,O60749,P06748,Q13596,Q92572,Q92974,Q96L92,Q9P253,Q9UBF2,Q9UNH7,Q9Y5X3
5	GO:0006888	endoplasmic reticulum to Golgi vesicle-mediated transport	Biological Process	6	Q8TD08,Q9HCU5,O00743,O15498,Q08379,Q9UBF2
5	GO:0007034	vacuolar transport	Biological Process	8	P49754,Q709C8,O43747,Q92572,Q9UID3,Q96L92,Q9P253,P11142
5	GO:0007097	nuclear migration	Biological Process	1	Q9Y613
5	GO:0016182	synaptic vesicle budding from endosome	Biological Process	1	O43747
5	GO:0016197	endosomal transport	Biological Process	15	O43747,Q96L92,Q9NQA3,Q9UID3,O60749,Q13596,O15498,Q4J6C6,Q9UNH7,Q9Y5X3,Q93009,P78537,Q2M389,Q2VPB7,Q6IAA8
5	GO:0016482	cytosolic transport	Biological Process	15	P57737,Q709C8,Q7Z3U7,O60749,Q13596,O15498,Q4J6C6,Q9NQA3,Q9UID3,Q9UNH7,Q9Y5X3,Q562E7,O43747,Q93009,P27361
5	GO:0030705	cytoskeleton-dependent intracellular transport	Biological Process	17	P78537,Q8TDH9,Q92572,Q96EV8,Q9NUP1,Q9GZM8,O00160,P42858,Q66K74,Q92845,Q9BQS8,Q9UBF2,O95817,P78559,P11142,P07437,Q9BQE3
5	GO:0032365	intracellular lipid transport	Biological Process	3	P50416,P28288,Q9UID3
5	GO:0036466	synaptic vesicle recycling via endosome	Biological Process	1	O43747
5	GO:0043485	endosome to pigment granule transport	Biological Process	2	O43747,Q8TDH9
5	GO:0043574	peroxisomal transport	Biological Process	2	O43933,P28288
5	GO:0051169	nuclear transport	Biological Process	27	O14980,P06748,Q6I9Y2,Q9BW27,O43592,P05455,O15397,O60518,O95373,P04637,P29590,P52292,Q15648,Q8N1F7,Q96P70,Q9UI26,Q9Y5L0,P38646,Q9UIA9,P39687,Q8NFH4,O95817,Q9UMX1,P62258,Q92688,O60524,Q2M389
5	GO:1903513	endoplasmic reticulum to cytosol transport	Biological Process	2	Q96CS3,Q8TCT9
5	GO:0033750	ribosome localization	Biological Process	2	O14980,P06748
5	GO:0050000	chromosome localization	Biological Process	6	Q14807,Q8NI77,Q9UJX2,Q9GZM8,Q66K74,Q96EB6
5	GO:0051646	mitochondrion localization	Biological Process	3	Q66K74,O75153,Q9P0L2
5	GO:0051647	nucleus localization	Biological Process	3	Q9Y613,Q96EB6,P42345
5	GO:0051648	vesicle localization	Biological Process	15	Q8TD08,Q9HCU5,O15498,O43747,Q92572,O00160,Q8TDH9,P42858,Q9GZM8,O00743,P78537,Q96EV8,Q9NUP1,Q92845,Q9BQS8
5	GO:0060151	peroxisome localization	Biological Process	1	O43933
5	GO:1990849	vacuolar localization	Biological Process	3	P78537,Q6IAA8,Q9GZM8
5	GO:0007269	neurotransmitter secretion	Biological Process	4	Q96EV8,Q15042,Q4J6C6,Q9P253
5	GO:0016079	synaptic vesicle exocytosis	Biological Process	4	Q15042,Q4J6C6,Q96EV8,Q9P253
5	GO:0035773	insulin secretion involved in cellular response to glucose stimulus	Biological Process	1	P62760
5	GO:0036465	synaptic vesicle recycling	Biological Process	4	O43747,Q92572,Q99961,P27824
5	GO:0051303	establishment of chromosome localization	Biological Process	6	Q14807,Q8NI77,Q9UJX2,Q66K74,Q96EB6,Q9GZM8
5	GO:0051650	establishment of vesicle localization	Biological Process	15	Q8TD08,Q9HCU5,O15498,O43747,Q92572,O00160,Q8TDH9,P42858,Q9GZM8,O00743,P78537,Q96EV8,Q9NUP1,Q92845,Q9BQS8
5	GO:0051660	establishment of centrosome localization	Biological Process	1	Q9Y613
5	GO:0060402	calcium ion transport into cytosol	Biological Process	3	P29590,P42858,P19174
5	GO:0090151	establishment of protein localization to mitochondrial membrane	Biological Process	2	Q8WWC4,Q9NZJ7
5	GO:0099504	synaptic vesicle cycle	Biological Process	9	O43747,Q92572,Q99961,P27824,Q9UI12,Q15042,Q4J6C6,Q96EV8,Q9P253
5	GO:0140238	presynaptic endocytosis	Biological Process	4	Q92572,Q99961,O43747,P27824
5	GO:0140239	postsynaptic endocytosis	Biological Process	1	Q8NBU5
5	GO:0072657	protein localization to membrane	Biological Process	16	O60725,P41743,P09132,P37108,P49458,P46379,P11021,Q8WWC4,Q9Y575,O95573,Q4J6C6,Q9NZJ7,Q9BT40,Q15042,Q8NBU5,Q6IAA8
5	GO:0098876	vesicle-mediated transport to the plasma membrane	Biological Process	6	Q9Y6D5,Q96L92,Q9NQA3,Q9UID3,O95573,Q4J6C6
5	GO:0034613	cellular protein localization	Biological Process	89	P29590,P62258,Q96RT1,Q9UID3,O15397,O60518,O95373,P04637,P52292,Q15648,Q8N1F7,Q96P70,Q9BW27,Q9UI26,Q9Y5L0,O14980,P38646,Q9UIA9,O60725,P41743,P09132,P37108,P49458,P46379,P49754,Q709C8,O43933,Q99797,O43592,O43747,O60749,P06748,Q13596,Q92572,Q92974,Q96L92,Q9P253,Q9UBF2,Q9UNH7,Q9Y5X3,Q96CS3,P11021,Q9HCU5,Q8WWC4,Q9GZM8,P50851,Q7Z3C6,O43660,Q96Q89,Q9Y575,O95817,Q9UMX1,O95573,Q4J6C6,Q9NZJ7,Q92688,P11142,…
5	GO:0045053	protein retention in Golgi apparatus	Biological Process	1	Q709C8
5	GO:0072595	maintenance of protein localization in organelle	Biological Process	2	P11021,P29590
5	GO:0051658	maintenance of nucleus location	Biological Process	1	Q96EB6
5	GO:0006880	intracellular sequestering of iron ion	Biological Process	2	P02792,P02794
5	GO:0006974	cellular response to DNA damage stimulus	Biological Process	54	P49917,Q96EB6,O94874,Q96RU2,Q99459,Q9UMS4,Q01831,P38398,O75419,P49736,Q9BRT9,Q15054,O60264,O75367,O75717,P06748,P20585,P32780,P35250,P35251,P50613,Q13112,Q14807,Q149N8,Q16531,Q96K58,P49848,Q9NXR7,Q93009,Q96K76,P04637,O60216,O96028,P78527,Q56NI9,Q96AY2,Q9Y4F3,P29590,P61254,Q13362,Q9NYZ3,Q9BXW9,P49005,P27361,Q96QE3,P46379,O43324,Q9H4I0,P35659,Q86U86,Q02880,P42345,Q13564,Q8TD08
5	GO:0009267	cellular response to starvation	Biological Process	14	P18847,P19525,P27361,P42345,O43159,P04637,P08243,P11021,Q96EB6,Q9BQG0,Q9Y4P3,P11142,P15104,P49754
5	GO:0010610	regulation of mRNA stability involved in response to stress	Biological Process	1	Q9NZI8
5	GO:0031102	neuron projection regeneration	Biological Process	1	Q99707
5	GO:0034605	cellular response to heat	Biological Process	6	P42345,Q96EB6,O95817,P17066,P62258,Q9UER7
5	GO:0034976	response to endoplasmic reticulum stress	Biological Process	17	P04637,P11021,P27824,P46379,Q8IXB1,Q96CS3,Q9H8Y5,P18847,P19525,Q9Y4P3,Q9NXW2,P29590,Q96EB6,O94874,P57088,Q8TCT9,Q13144
5	GO:0035967	cellular response to topologically incorrect protein	Biological Process	11	P11021,P18847,P19525,Q9Y4P3,O95817,Q9UER7,Q8IXB1,Q9NXW2,P46379,O94874,P57088
5	GO:0043555	regulation of translation in response to stress	Biological Process	2	P29590,P06748
5	GO:0043620	regulation of DNA-templated transcription in response to stress	Biological Process	4	P04637,O95817,P11021,P18847
5	GO:0062197	cellular response to chemical stress	Biological Process	16	P29590,O75569,Q8TCT9,Q9BXW9,O15111,P27361,Q9UER7,Q02880,Q15910,Q96EB6,Q9H8Y5,P42345,Q92974,P04637,Q96IZ0,Q96PN6
5	GO:0071456	cellular response to hypoxia	Biological Process	5	P04637,P35520,P42345,Q96EB6,Q9Y4P3
5	GO:0098780	response to mitochondrial depolarisation	Biological Process	1	Q709C8
5	GO:0140467	integrated stress response signaling	Biological Process	2	P11021,P57088
5	GO:0031670	cellular response to nutrient	Biological Process	2	Q15648,P42345
5	GO:0060326	cell chemotaxis	Biological Process	3	P27361,P40429,Q9BW27
5	GO:0071229	cellular response to acid chemical	Biological Process	2	P42345,Q6IAA8
5	GO:0071236	cellular response to antibiotic	Biological Process	2	Q15910,P04637
5	GO:0071241	cellular response to inorganic substance	Biological Process	6	O15111,P27361,Q9UER7,P49917,Q99707,Q96PN6
5	GO:0071243	cellular response to arsenic-containing substance	Biological Process	1	Q9UER7
5	GO:0071310	cellular response to organic substance	Biological Process	66	Q96DX7,Q15648,O00507,O15198,P04637,P29590,Q96EB6,P27361,Q92572,Q9GZM8,Q2Q1W2,P32780,P11021,Q09028,Q9UNH7,Q8TDD1,Q9UER7,P18847,P19525,Q9Y4P3,P41743,P42224,P42345,P78527,Q9BT40,O94874,P38398,Q9P253,O15111,O95817,P62760,Q15910,Q92839,Q8IXB1,P19338,Q92610,P04899,Q9Y5X3,Q92558,Q96F07,Q96EV8,Q9UIV1,Q9Y6K5,P06748,Q9NXW2,Q92974,Q6IAA8,Q02880,Q96RR1,P40429,Q08722,Q02952,P39023,P49736,Q96RT1,O14730,P19174,…
5	GO:0071453	cellular response to oxygen levels	Biological Process	5	P04637,P35520,P42345,Q96EB6,Q9Y4P3
5	GO:0071466	cellular response to xenobiotic stimulus	Biological Process	3	Q9BQB6,Q9UMX1,P04637
5	GO:0097237	cellular response to toxic substance	Biological Process	1	Q12923
5	GO:1901522	positive regulation of transcription from RNA polymerase II promoter involved in cellular response to chemical stimulus	Biological Process	2	P04637,O15198
5	GO:1901699	cellular response to nitrogen compound	Biological Process	25	P04899,P27361,Q92572,Q9GZM8,P41743,P42224,P42345,P78527,Q9BT40,Q15910,P19338,Q92610,Q96EB6,Q9Y5X3,Q96EV8,P06748,Q92974,Q6IAA8,Q02880,O14730,P38398,Q99707,P04637,Q9UER7,Q9UNH7
5	GO:1901701	cellular response to oxygen-containing compound	Biological Process	30	P04899,P27361,Q92572,Q9GZM8,P41743,P42224,P42345,P78527,Q9BT40,O15111,P62760,Q15910,P19338,Q92610,Q96EB6,Q9Y5X3,Q96EV8,Q02880,Q9H8Y5,Q15648,Q92974,Q6IAA8,Q96RR1,Q8NI77,P50416,P38398,Q99707,P04637,Q96IZ0,Q9UNH7
5	GO:1902075	cellular response to salt	Biological Process	1	Q9UER7
5	GO:0071219	cellular response to molecule of bacterial origin	Biological Process	1	P27361
5	GO:0072396	response to cell cycle checkpoint signaling	Biological Process	1	Q96AY2
5	GO:0015749	monosaccharide transmembrane transport	Biological Process	2	Q9BT40,P41743
5	GO:0098655	cation transmembrane transport	Biological Process	9	P42858,Q8WWC4,P19174,Q9UI12,P30825,Q9BWM7,P62258,Q9H2H9,Q15758
5	GO:0098656	anion transmembrane transport	Biological Process	6	Q9UJS0,P30825,Q15758,Q9BWM7,Q9H2H9,Q96PN6
5	GO:0098660	inorganic ion transmembrane transport	Biological Process	5	P42858,Q8WWC4,P19174,Q9UI12,P62258
5	GO:0089709	L-histidine transmembrane transport	Biological Process	1	P30825
5	GO:0044743	protein transmembrane import into intracellular organelle	Biological Process	1	O43933
5	GO:0065002	intracellular protein transmembrane transport	Biological Process	2	O43933,P11021
5	GO:1990544	mitochondrial ATP transmembrane transport	Biological Process	1	Q96PN6
5	GO:0089718	amino acid import across plasma membrane	Biological Process	3	P30825,Q15758,Q9H2H9
5	GO:1990034	calcium ion export across plasma membrane	Biological Process	1	P62258
5	GO:1905039	carboxylic acid transmembrane transport	Biological Process	7	Q9H2H9,P50416,Q9UJS0,P28288,P30825,Q15758,Q9BWM7
5	GO:0006851	mitochondrial calcium ion transmembrane transport	Biological Process	1	Q8WWC4
5	GO:0006853	carnitine shuttle	Biological Process	1	P50416
5	GO:0035927	RNA import into mitochondrion	Biological Process	2	Q16762,Q9H0U6
5	GO:0043490	malate-aspartate shuttle	Biological Process	1	Q9UJS0
5	GO:0140300	serine import into mitochondrion	Biological Process	1	Q9BWM7
5	GO:0000422	autophagy of mitochondrion	Biological Process	6	P04637,P50851,Q96PN6,P42858,Q709C8,Q7Z3C6
5	GO:0010506	regulation of autophagy	Biological Process	16	P42345,Q08379,O94874,Q96EB6,Q9UI12,Q9UNH7,Q9Y5X3,Q9BQS8,Q96PN6,P04637,P42858,P27361,Q709C8,O95817,Q15042,Q8TD08
5	GO:0010507	negative regulation of autophagy	Biological Process	3	P42345,P04637,Q08379
5	GO:0010508	positive regulation of autophagy	Biological Process	7	Q96EB6,Q9BQS8,P42858,P27361,O95817,Q15042,O94874
5	GO:0016236	macroautophagy	Biological Process	19	O95817,Q7Z3C6,P04637,P50851,Q96EB6,P42345,Q9UI12,Q9UNH7,Q9Y5X3,Q562E7,O94874,P27361,Q9BQS8,Q96PN6,P42858,Q709C8,Q15042,P49754,Q14596
5	GO:0044804	autophagy of nucleus	Biological Process	1	Q7Z3C6
5	GO:0061684	chaperone-mediated autophagy	Biological Process	2	P11142,O95817
5	GO:0061738	late endosomal microautophagy	Biological Process	1	P11142
5	GO:0071211	protein targeting to vacuole involved in autophagy	Biological Process	1	P11142
5	GO:0006325	chromatin organization	Biological Process	42	O43159,O60264,Q96EB6,Q9UIF9,O75367,P06748,P07305,P16403,P49736,Q09028,Q13112,Q149N8,Q15020,Q8WXX5,Q92522,Q92688,Q9BQ67,Q9NRL2,Q9UER7,O75475,P11387,P28370,P35659,Q06587,Q68DK7,Q86U86,Q9BQG0,Q9NR30,P49711,P38398,Q01780,Q15022,Q15910,Q96SB4,Q9Y483,P04637,Q9Y3T9,P42898,O60216,P46379,Q9NQZ2,Q9NXR7
5	GO:0006996	organelle organization	Biological Process	198	P05388,P27635,P46087,P46777,P62750,P83731,Q02878,Q14137,Q9NVX2,Q9Y3A4,O95817,Q7Z3C6,Q86XI2,Q8NI77,Q9BXS6,P42858,Q9GZM8,O43159,O60264,Q96EB6,Q9UIF9,P07437,P68366,P78559,Q15813,Q3KQU3,Q66K74,Q7Z4H7,Q9BQE3,Q9BTW9,Q9P0L2,P04637,P50851,Q02880,Q96AY2,P78527,Q8TD08,Q9HCU5,Q96RR1,P11387,O75419,P49736,Q14691,Q9BRT9,Q9BRX5,P46379,Q15910,Q9NQZ2,Q9NXR7,Q9Y483,O75367,P06748,P07305,P16403,Q09028,Q13112,Q149N8,…
5	GO:0010256	endomembrane system organization	Biological Process	22	Q8N1F7,Q8TD08,P42858,P57737,Q08379,Q14155,Q9UID3,Q2M389,Q6IAA8,Q9P253,Q9Y6D5,Q9UI12,O43747,P78537,Q92572,Q96EV8,P57088,P46379,P27361,Q9UKS6,Q5VU43,Q15042
5	GO:0022411	cellular component disassembly	Biological Process	18	Q7Z3C6,P04637,P50851,Q9BQ67,Q8NI77,Q92974,Q99961,P78559,Q66K74,Q9Y3A4,O94874,P11142,Q08379,Q9BQS8,Q96PN6,Q9HAN9,P42858,Q709C8
5	GO:0022607	cellular component assembly	Biological Process	130	P05388,P27635,P46087,P46777,P62750,P83731,Q02878,Q14137,Q9NVX2,Q9Y3A4,O95817,Q7Z3C6,O43159,O60264,Q96EB6,Q9UIF9,Q15020,Q9UMS4,P78362,Q96SB4,O75475,Q12872,Q53T94,Q8TD08,Q9HCU5,O75367,P06748,P07305,P16403,P49736,Q09028,Q13112,Q149N8,Q8WXX5,Q92522,Q92688,Q9BQ67,Q9NRL2,Q9UER7,P09132,Q08379,Q9GZM8,P17987,Q15813,Q9BTW9,Q16531,P46379,Q9UBW8,P42345,Q9NYB9,Q9Y2A7,Q504Q3,O94927,Q7Z4H7,Q9BT25,P38646,Q9Y3D0,…
5	GO:0030030	cell projection organization	Biological Process	40	P78559,Q02880,Q66K74,Q8TER5,Q96F07,Q9BPU6,P42345,Q9NYB9,Q9Y2A7,Q9GZM8,Q9P0L2,P41743,Q14155,Q9BW27,Q99707,P78537,Q8TDH9,Q96EV8,Q9NUP1,P83731,Q92845,P42858,Q96PN6,Q96Q89,Q6SZW1,Q15813,Q16181,Q7Z3E5,Q9Y3A4,Q14831,O60749,Q13459,Q13596,Q92558,Q9BT40,Q9NZI8,Q9HCE1,Q15910,Q8TD08,Q9NYC9
5	GO:0032535	regulation of cellular component size	Biological Process	7	P06748,P42345,Q86VI3,Q96F07,Q9Y2A7,Q96PN6,P78537
5	GO:0034330	cell junction organization	Biological Process	10	Q9BTW9,Q9NYB9,P41743,Q14155,P07437,Q96EV8,Q92558,P40123,P11142,Q12923
5	GO:0043062	extracellular structure organization	Biological Process	2	Q15582,Q92839
5	GO:0043933	protein-containing complex organization	Biological Process	99	P05388,P27635,P46087,P46777,P62750,P83731,Q02878,Q14137,Q9NVX2,Q9Y3A4,Q15020,Q9UMS4,P78362,Q96SB4,O75475,Q12872,Q53T94,Q9UIF9,Q8TD08,Q9HCU5,O60264,O75367,P06748,P07305,P16403,P49736,Q09028,Q13112,Q149N8,Q8WXX5,Q92522,Q92688,Q9BQ67,Q9NRL2,Q9UER7,P09132,Q8NI77,Q08379,Q9GZM8,P17987,Q15813,Q9BTW9,Q92974,Q9UBW8,O94927,Q7Z4H7,Q9BT25,Q99961,P57737,Q92558,Q8WZ42,Q96F07,P42345,Q9Y2A7,P78559,Q66K74,O14730,…
5	GO:0045229	external encapsulating structure organization	Biological Process	2	Q15582,Q92839
5	GO:0061024	membrane organization	Biological Process	18	Q8TD08,Q9HCU5,Q8N1F7,P38646,Q6UXV4,Q8WWC4,O43747,Q92572,P49754,Q9P253,P04637,Q9NZJ7,P41743,O00743,P46379,Q9UKS6,P11142,P57088
5	GO:0097435	supramolecular fiber organization	Biological Process	35	O00160,P40123,P41743,Q01518,Q92974,Q8NI77,Q08379,Q9GZM8,Q9NYB9,O94927,Q7Z4H7,Q9BT25,P57737,Q92558,Q8WZ42,Q96F07,P42345,Q9Y2A7,Q5VU43,P78559,Q66K74,Q9BTW9,Q8IYT4,Q9NQA3,Q2M389,P49407,Q7Z3Y8,Q96IZ0,Q9Y613,Q08722,Q9BT40,P52952,P11142,Q86VI3,Q14155
5	GO:0099172	presynapse organization	Biological Process	1	P40123
5	GO:0099173	postsynapse organization	Biological Process	3	Q9NYB9,Q96EV8,P11142
5	GO:1990700	nucleolar chromatin organization	Biological Process	4	O43159,O60264,Q96EB6,Q9UIF9
5	GO:0017126	nucleologenesis	Biological Process	1	Q9H9Y6
5	GO:0022613	ribonucleoprotein complex biogenesis	Biological Process	88	P05388,P27635,P46087,P46777,P62750,P83731,Q02878,Q14137,Q9NVX2,Q9Y3A4,O14980,P06748,Q6IN84,Q9H0A0,Q15020,Q9UMS4,P78362,Q96SB4,O75475,Q12872,Q9Y324,O95478,P78527,Q01780,Q9H9Y2,O15213,P62241,Q8IY37,Q969X6,Q9H583,Q9NQZ2,O00541,P18124,P42766,Q6DKI1,Q9BYG3,Q9BZE4,Q9NVP1,Q06265,P62424,P62906,Q9BRU9,O43159,O75817,O95707,P18077,P50914,P61254,P61353,P62753,P62847,Q13601,Q13610,Q8NDF8,Q8TDD1,Q8TED0,Q96GQ7,…
5	GO:0030262	apoptotic nuclear changes	Biological Process	1	Q9HAN9
5	GO:0006887	exocytosis	Biological Process	10	O15498,Q9P253,O43747,P62760,P04899,Q15042,Q4J6C6,Q96EV8,Q9NQA3,Q9Y6D5
5	GO:0009306	protein secretion	Biological Process	7	P62760,Q8WZ42,P50416,O43747,P27824,Q9HCU5,Q9UBF2
5	GO:0010585	glutamine secretion	Biological Process	1	Q15758
5	GO:0014047	glutamate secretion	Biological Process	3	Q14831,Q15042,Q96EV8
5	GO:0050432	catecholamine secretion	Biological Process	1	Q96EV8
5	GO:0046813	receptor-mediated virion attachment to host cell	Biological Process	1	Q9H2X3
5	GO:0075732	viral penetration into host nucleus	Biological Process	1	P52292
5	GO:0039692	single stranded viral RNA replication via double stranded DNA intermediate	Biological Process	3	Q9BT40,Q9NRW3,Q02880
5	GO:0045091	regulation of single stranded viral RNA replication via double stranded DNA intermediate	Biological Process	3	Q9BT40,Q9NRW3,Q02880
5	GO:0045870	positive regulation of single stranded viral RNA replication via double stranded DNA intermediate	Biological Process	1	Q02880
5	GO:0045869	negative regulation of single stranded viral RNA replication via double stranded DNA intermediate	Biological Process	2	Q9BT40,Q9NRW3
5	GO:0019065	receptor-mediated endocytosis of virus by host cell	Biological Process	1	Q9H2X3
5	GO:0046543	development of secondary female sexual characteristics	Biological Process	1	Q15648
5	GO:0008406	gonad development	Biological Process	5	Q13144,Q96EB6,Q9Y2H6,Q8NI77,Q8IY37
5	GO:0046545	development of primary female sexual characteristics	Biological Process	2	Q13144,Q96EB6
5	GO:0046546	development of primary male sexual characteristics	Biological Process	3	Q9Y2H6,Q8NI77,Q8IY37
5	GO:0001541	ovarian follicle development	Biological Process	1	Q13144
5	GO:0001890	placenta development	Biological Process	2	Q15648,P62753
5	GO:0072520	seminiferous tubule development	Biological Process	1	Q8NI77
5	GO:1901995	positive regulation of meiotic cell cycle phase transition	Biological Process	1	Q8TD08
5	GO:0090306	meiotic spindle assembly	Biological Process	2	Q16531,Q08379
5	GO:0000712	resolution of meiotic recombination intermediates	Biological Process	2	Q02880,Q96AY2
5	GO:0044785	metaphase/anaphase transition of meiotic cell cycle	Biological Process	1	Q8TD08
5	GO:0045143	homologous chromosome segregation	Biological Process	2	Q9BXW9,P46379
5	GO:0045144	meiotic sister chromatid segregation	Biological Process	2	O60216,P30153
5	GO:0007127	meiosis I	Biological Process	5	Q02880,Q96AY2,Q9BXW9,P46379,O60216
5	GO:1990949	metaphase/anaphase transition of meiosis I	Biological Process	1	Q8TD08
5	GO:0007135	meiosis II	Biological Process	2	O60216,P30153
5	GO:0007129	homologous chromosome pairing at meiosis	Biological Process	2	P46379,Q9BXW9
5	GO:0007130	synaptonemal complex assembly	Biological Process	1	P46379
5	GO:1902102	regulation of metaphase/anaphase transition of meiotic cell cycle	Biological Process	1	Q8TD08
5	GO:2000018	regulation of male gonad development	Biological Process	1	Q8IY37
5	GO:1902104	positive regulation of metaphase/anaphase transition of meiotic cell cycle	Biological Process	1	Q8TD08
5	GO:2000020	positive regulation of male gonad development	Biological Process	1	Q8IY37
5	GO:0014046	dopamine secretion	Biological Process	1	Q96EV8
5	GO:0046879	hormone secretion	Biological Process	2	P62760,P50416
5	GO:0099643	signal release from synapse	Biological Process	4	Q96EV8,Q15042,Q4J6C6,Q9P253
5	GO:0099537	trans-synaptic signaling	Biological Process	14	Q96EV8,P39086,Q14831,Q9H2H9,P78559,Q15042,P19174,P27361,Q02952,P04899,Q15910,Q8NBU5,Q4J6C6,Q9P253
5	GO:0016055	Wnt signaling pathway	Biological Process	10	P30153,P67775,B7ZLD0,P52952,P78368,Q38SD2,Q96K76,Q9NVX2,Q16531,Q9P0L2
5	GO:0099565	chemical synaptic transmission, postsynaptic	Biological Process	1	Q15042
5	GO:0090276	regulation of peptide hormone secretion	Biological Process	2	P62760,P50416
5	GO:0050804	modulation of chemical synaptic transmission	Biological Process	13	Q96EV8,Q9H2H9,P78559,Q15042,P04899,P39086,Q14831,Q8NBU5,Q4J6C6,Q9P253,P19174,P27361,Q02952
5	GO:0090277	positive regulation of peptide hormone secretion	Biological Process	1	P62760
5	GO:0051968	positive regulation of synaptic transmission, glutamatergic	Biological Process	2	Q15042,Q96EV8
5	GO:0090278	negative regulation of peptide hormone secretion	Biological Process	1	P62760
5	GO:0051967	negative regulation of synaptic transmission, glutamatergic	Biological Process	1	Q8NBU5
5	GO:0086091	regulation of heart rate by cardiac conduction	Biological Process	1	P62258
5	GO:0030500	regulation of bone mineralization	Biological Process	1	Q14596
5	GO:0001958	endochondral ossification	Biological Process	1	P35520
5	GO:0048754	branching morphogenesis of an epithelial tube	Biological Process	2	P29590,Q15648
[truncated: 3,038 more rows]

## Sheet: MF
Level	GO_ID	Term	Type	Seqs_Num	Sequences
1	GO:0003674	molecular_function	Molecular Function	526	O43592,O60524,O60841,P05455,P18077,P49588,Q13325,Q7Z2T5,Q92552,Q9H0A0,Q9Y2Z4,P30825,Q6IAN0,O00160,Q13459,Q01780,O00411,Q06265,Q504Q3,Q9UIV1,Q9UNQ2,O75367,Q9NXR7,A4D1E9,P78362,Q96PN6,Q96SB4,Q9P0L2,Q9HAN9,Q01831,O95817,P04637,P18847,P20226,P38398,P49711,P52952,P42224,Q3KP31,Q8TF47,Q8WY36,Q96QR8,Q99459,Q9Y483,Q9Y6Q3,O15198,O95625,P11387,P51814,Q09028,Q15022,Q15648,Q15776,Q15910,Q32MZ4,Q6ZN55,Q8TF39,…
2	GO:0003774	cytoskeletal motor activity	Molecular Function	7	O00160,Q13459,A0A6Q8PFA6,Q14807,Q96Q89,Q9NYC9,Q8NI77
2	GO:0003824	catalytic activity	Molecular Function	198	Q6IAN0,O00411,Q01780,Q06265,Q504Q3,Q9UIV1,Q9UNQ2,Q9HAN9,O15160,Q9Y6K5,P49588,Q7L2E3,Q96RR1,P35251,Q6P158,Q8IY37,Q8NHQ9,Q8TDD1,Q96GQ7,Q9BQ39,Q9GZR7,Q9H0S4,Q9NR30,Q9NVP1,Q13427,Q5T1M5,O60725,Q8NDF8,P52434,Q4G0F4,Q9H1D9,Q9H9Y6,Q9NW08,P49917,P11387,Q02880,A4D1E9,O60841,P01111,P04899,P07437,Q16181,Q9BZE4,Q9HCN4,Q9UPQ3,Q6IA69,Q6SZW1,Q16795,P11310,Q96PN6,P08243,P50416,P35520,Q9NRW3,Q6UB28,Q93009,Q99797,…
2	GO:0005198	structural molecule activity	Molecular Function	85	A8K7N0,F8W7C6,P05386,P05387,P05388,P15880,P18077,P18124,P18621,P26373,P27635,P30050,P35268,P36578,P39023,P40429,P42766,P46776,P46777,P46778,P46779,P46781,P47914,P49207,P50914,P61247,P61254,P61353,P61927,P62241,P62266,P62280,P62424,P62750,P62753,P62847,P62888,P62899,P62906,P62910,P62917,P82912,P82914,P82930,P83731,P83881,P84098,Q02543,Q02878,Q07020,Q6DKI1,Q6FG99,Q6IPH7,Q8N5C6,Q8TCC3,Q969Q0,Q96EL2,…
2	GO:0005215	transporter activity	Molecular Function	14	P30825,Q9H2H9,Q9UJS0,P28288,Q16795,Q9BWM7,Q6P4Q7,Q15758,P39086,Q7Z3C6,Q9H2V7,Q9UI12,O43933,Q8NBU5
2	GO:0005488	binding	Molecular Function	477	O43592,O60524,O60841,P05455,P18077,P49588,Q13325,Q7Z2T5,Q92552,Q9H0A0,Q9Y2Z4,Q01780,O75367,Q9NXR7,A4D1E9,P78362,Q96PN6,Q96SB4,Q9P0L2,Q01831,O95817,P04637,P18847,P20226,P38398,P49711,P52952,P42224,Q3KP31,Q8TF47,Q8WY36,Q96QR8,Q99459,Q9Y483,Q9Y6Q3,O15198,O95625,P11387,P51814,Q09028,Q15022,Q15648,Q15776,Q15910,Q32MZ4,Q6ZN55,Q8TF39,Q96EB6,Q96K58,P42345,O00411,P06748,P17480,Q53T94,Q15370,P30825,Q15758,…
2	GO:0031386	protein tag	Molecular Function	1	Q15843
2	GO:0044183	protein folding chaperone	Molecular Function	11	P11021,P11142,P17066,P17987,P38646,P40227,P49368,P50990,P50991,P78371,Q99832
2	GO:0045182	translation regulator activity	Molecular Function	10	O60841,Q13144,Q14232,P19525,Q8NE71,Q2Q1W2,O00425,P27635,P46781,Q9NZI8
2	GO:0060089	molecular transducer activity	Molecular Function	10	Q9NQS5,Q14831,Q8NGH5,Q9BT40,P39086,Q9H2X3,Q15758,Q9P2E9,B7ZLD0,Q08722
2	GO:0060090	molecular adaptor activity	Molecular Function	22	O15498,P78559,Q9NYB9,P11142,Q13428,Q13617,Q15054,Q16531,Q86VM9,Q9P253,Q6SZW1,O43747,Q6IAA8,P06748,Q9UER7,Q9UJX3,Q9HAN9,A7E2V4,Q9Y4B6,P29590,Q16181,Q5VU43
2	GO:0098772	molecular function regulator activity	Molecular Function	47	O95817,Q8IXB1,P01111,P49407,P06748,O94887,Q13144,Q14155,Q15042,Q8TER5,Q92974,Q9HCU5,Q9Y6D5,A7KAX9,Q13459,Q86VI3,Q86X10,Q8IZ81,Q8TC07,Q9BTW9,Q9UPQ3,P62258,O75569,P35251,Q15022,Q9UKL3,Q14831,Q9UKS6,P19525,P30153,P63151,Q13362,Q14738,Q8TF05,Q9UI12,O75367,P05386,Q9UER7,O95373,Q562E7,P04637,Q96CS3,P61289,Q16186,Q06587,P46777,P61927
2	GO:0140104	molecular carrier activity	Molecular Function	11	O14980,Q9UIA9,Q9NZJ7,O60518,P52292,Q96P70,Q9UI26,Q9Y5L0,O95817,P11142,Q13610
2	GO:0140110	transcription regulator activity	Molecular Function	49	O15198,O95625,P04637,P18847,P42224,P51814,P52952,Q15776,Q32MZ4,Q3KP31,Q8TF39,Q8WY36,Q96QR8,Q99459,Q9Y2D9,P49711,Q8TF47,Q96K58,Q9Y6Q3,Q6ZN55,Q2TB10,Q8N1G0,Q92610,Q96ME7,Q9ULD5,Q13643,Q15648,Q9NPJ6,O75475,P06748,P29590,P38398,P49407,P49848,Q01831,Q96EB6,Q9UER7,Q15910,Q6IAN0,Q8TDD1,Q96IZ0,Q96T58,Q9BQ70,Q9BQG0,Q9UDR5,Q9UIV1,Q9UKL3,Q9UMX1,Q9Y3T9
2	GO:0140223	general transcription initiation factor activity	Molecular Function	6	P20226,Q12789,Q8WUA4,Q9Y5Q9,P17480,P49848
2	GO:0140299	small molecule sensor activity	Molecular Function	2	Q01831,P20585
2	GO:0140313	molecular sequestering activity	Molecular Function	2	P62258,P02794
2	GO:0140657	ATP-dependent activity	Molecular Function	53	O00160,Q13459,Q7L2E3,Q96RR1,P35251,Q6P158,Q8IY37,Q8NHQ9,Q8TDD1,Q96GQ7,Q9BQ39,Q9GZR7,Q9H0S4,Q9NR30,Q9NVP1,A0A6Q8PFA6,Q14807,Q96Q89,Q02880,O60264,P28370,P49736,Q149N8,Q9H6S0,O95573,P50613,Q8IYT4,Q9NYC9,Q8NI77,O43933,P11021,P11142,P17066,P17987,P28288,P35250,P38646,P40227,P49368,P50990,P50991,P78371,Q8NB90,Q8NBU5,Q8NE71,Q96QE3,Q99832,Q9HCE1,Q9HCN4,Q9NTK5,P04637,Q9UI12,P20585
3	GO:0000146	microfilament motor activity	Molecular Function	2	O00160,Q13459
3	GO:0003777	microtubule motor activity	Molecular Function	5	Q9NYC9,Q8NI77,Q96Q89,A0A6Q8PFA6,Q14807
3	GO:0009975	cyclase activity	Molecular Function	1	Q96PN6
3	GO:0016491	oxidoreductase activity	Molecular Function	12	Q6IAN0,Q16795,P11310,P02794,P43304,P42898,Q9UDR5,Q9UBM7,Q8IXB1,Q9BQB6,Q9NVH6,P35520
3	GO:0016740	transferase activity	Molecular Function	84	Q9UNQ2,Q9HAN9,O15160,Q9Y6K5,O60725,Q8NDF8,O00411,P52434,Q4G0F4,Q9H1D9,Q9H9Y6,Q9NW08,P50416,Q06210,Q56NI9,O15111,P10398,P19525,P41743,P42345,P50613,P78527,Q13523,Q8TD08,Q96SB4,O14730,P11387,P27361,P78362,P78368,Q38SD2,Q8WZ42,Q9P0L2,P46020,Q07002,Q16762,Q7Z2T5,O95376,P38398,P61081,P62256,Q13617,Q149N8,Q2Q1W2,Q5TA31,Q75N03,Q7Z569,Q9UJX2,Q9UJX5,Q9UMS4,Q9Y4D8,Q9Y4X5,Q9H0A0,Q9NQV6,Q7L2J0,Q8NAT1,Q99707,…
3	GO:0016787	hydrolase activity	Molecular Function	91	O00411,Q01780,Q06265,Q504Q3,Q9UIV1,P49588,A4D1E9,O60841,P01111,P04899,P07437,Q16181,Q9BZE4,Q9HCN4,Q9UPQ3,Q6SZW1,Q9NRW3,Q6UB28,Q93009,Q99797,P48147,Q4J6C6,Q6IA69,Q96EB6,O60502,P19174,Q9BT40,Q96AY2,Q9H8Y5,O75817,O95707,Q9Y4F3,Q8IY17,P67775,Q14738,O00743,P30153,Q12923,O00507,Q96K76,Q96RU2,Q8TCT9,Q9H857,Q8IXW5,Q9BPU6,O43933,O60264,P11021,P11142,P17066,P17987,P28288,P35250,P35251,P38646,P40227,P49368,…
3	GO:0016829	lyase activity	Molecular Function	2	Q96PN6,P35520
3	GO:0016853	isomerase activity	Molecular Function	7	Q13427,Q5T1M5,P11387,Q02880,Q9NPH2,Q8N0Z8,Q8IYT4
3	GO:0016874	ligase activity	Molecular Function	10	P49917,Q6IA69,P08243,P15104,O95573,Q9HCC0,O15067,P49588,Q9Y2Z4,Q13564
3	GO:0140096	catalytic activity, acting on a protein	Molecular Function	72	Q13427,Q5T1M5,O60725,Q6UB28,Q93009,Q99797,P48147,Q4J6C6,Q96EB6,O15111,P10398,P19525,P41743,P42345,P50613,P78527,Q13523,Q8TD08,Q96SB4,O14730,P11387,P27361,P78362,P78368,Q38SD2,Q8WZ42,Q9P0L2,P46020,Q07002,P67775,Q14738,O00743,P30153,Q12923,Q13564,O95376,P38398,P61081,P62256,Q13617,Q149N8,Q2Q1W2,Q5TA31,Q75N03,Q7Z569,Q9UJX2,Q9UJX5,Q9UMS4,Q9Y4D8,Q9Y4X5,O00507,Q96K76,Q96RU2,Q8TCT9,Q8IXW5,Q8IYT4,Q8IXB1,…
3	GO:0140640	catalytic activity, acting on a nucleic acid	Molecular Function	53	O00411,Q01780,Q06265,Q504Q3,Q9UIV1,Q9UNQ2,O15160,P49588,Q7L2E3,Q96RR1,P35251,Q6P158,Q8IY37,Q8NHQ9,Q8TDD1,Q96GQ7,Q9BQ39,Q9GZR7,Q9H0S4,Q9NR30,Q9NVP1,Q8NDF8,P52434,Q4G0F4,Q9H1D9,Q9H9Y6,Q9NW08,P49917,P11387,Q02880,O60264,P28370,P49736,Q149N8,Q9H6S0,Q9H8Y5,O75817,O95707,Q9Y4F3,Q7Z2T5,Q9Y2Z4,P50613,Q7L2J0,Q9H5U6,P46087,Q96P11,Q9BVS5,Q6IN84,Q96GJ1,Q9HCE1,Q5TAX3,Q96QE3,P20585
3	GO:0003735	structural constituent of ribosome	Molecular Function	67	A8K7N0,F8W7C6,P05386,P05387,P05388,P15880,P18077,P18124,P18621,P26373,P27635,P30050,P35268,P36578,P39023,P40429,P42766,P46776,P46777,P46778,P46779,P46781,P47914,P49207,P50914,P61247,P61254,P61353,P61927,P62241,P62266,P62280,P62424,P62750,P62753,P62847,P62888,P62899,P62906,P62910,P62917,P82912,P82914,P82930,P83731,P83881,P84098,Q02543,Q02878,Q07020,Q6DKI1,Q6FG99,Q6IPH7,Q8N5C6,Q8TCC3,Q969Q0,Q96EL2,…
3	GO:0005200	structural constituent of cytoskeleton	Molecular Function	5	P07437,P11171,P68366,Q96RT1,Q9BQE3
3	GO:0005201	extracellular matrix structural constituent	Molecular Function	1	Q15582
3	GO:0008307	structural constituent of muscle	Molecular Function	1	Q8WZ42
3	GO:0017056	structural constituent of nuclear pore	Molecular Function	2	Q8N1F7,Q9BW27
3	GO:0030527	structural constituent of chromatin	Molecular Function	4	O75367,P07305,P16403,Q92522
3	GO:0097493	structural molecule activity conferring elasticity	Molecular Function	1	Q8WZ42
3	GO:0005319	lipid transporter activity	Molecular Function	2	P28288,Q7Z3C6
3	GO:0022857	transmembrane transporter activity	Molecular Function	11	P30825,Q9H2H9,Q9UJS0,Q16795,Q9BWM7,Q6P4Q7,Q15758,P39086,P28288,Q9UI12,Q9H2V7
3	GO:0140318	protein transporter activity	Molecular Function	2	Q8NBU5,O43933
3	GO:0003682	chromatin binding	Molecular Function	35	O75367,P07305,P16403,Q15022,Q15648,Q15910,O60264,P28370,Q9Y3T9,Q92522,P49711,P04637,P42224,Q96EB6,O60216,O75419,O75475,O75717,O96028,P06748,P11387,P17480,P32780,P52952,Q02880,Q06587,Q13112,Q68DK7,Q7L2E3,Q86U86,Q8IXK0,Q8TD08,Q9BQ67,Q9H4I0,Q9Y483
3	GO:0003823	antigen binding	Molecular Function	2	Q9H2X3,P30153
3	GO:0005515	protein binding	Molecular Function	255	P20226,P04637,P42345,P49711,P42224,Q15022,Q15370,Q15910,Q9Y483,Q15648,P04899,P11142,P49407,P27361,Q16186,Q8WZ42,Q96RR1,P38398,P42858,P61289,Q93009,Q96EB6,Q9UER7,A0A0A0MRA8,A0A590UJG2,D3DPU2,O00160,P11171,P40123,P57737,P78559,Q01518,Q13459,Q13643,Q5T1M5,Q66K74,Q8NI77,Q92558,Q96IZ0,Q9NQA3,Q9P253,P46379,Q8TDD1,Q96RT1,Q9UKL3,O60749,Q13596,Q9BUZ4,Q9NXR7,P19174,Q15582,I3L213,P46020,Q02952,Q86VI3,Q93100…
3	GO:0008289	lipid binding	Molecular Function	13	P11142,Q9P0L2,P41743,Q9UKS6,Q9UPQ3,P11171,Q9Y5X3,Q96L92,O60749,Q13596,Q9UNH7,A7KAX9,Q99961
3	GO:0030246	carbohydrate binding	Molecular Function	2	Q9H2X3,P27824
3	GO:0033218	amide binding	Molecular Function	7	Q9NXR7,O60518,P52292,Q7Z569,Q13427,P37108,Q9H2X3
3	GO:0036094	small molecule binding	Molecular Function	110	Q01780,O95817,A0A6Q8PFA6,O00160,O14730,O15067,O15111,O43933,O60264,O95573,P08243,P10398,P11021,P11142,P11387,P15104,P17066,P17987,P19525,P20585,P27361,P28288,P28370,P35250,P35251,P38646,P40227,P41743,P42345,P49368,P49588,P49736,P49917,P50613,P50990,P50991,P61081,P62256,P78362,P78368,P78371,P78527,Q02880,Q07002,Q13459,Q13523,Q14807,Q149N8,Q38SD2,Q6IA69,Q6P158,Q7L2E3,Q8IY37,Q8IYT4,Q8NB90,Q8NBU5,Q8N…
3	GO:0043167	ion binding	Molecular Function	189	A4D1E9,P78362,Q96PN6,Q96SB4,Q9P0L2,P02792,P02794,Q9NVH6,P04637,A0A590UJG2,P11021,P19174,P27824,P43304,P62760,Q14831,Q8WZ42,Q9UJS0,A0A6Q8PFA6,O00160,O14730,O15067,O15111,O43933,O60264,O95573,P08243,P10398,P11142,P11387,P15104,P17066,P17987,P19525,P20585,P27361,P28288,P28370,P35250,P35251,P38646,P40227,P41743,P42345,P49368,P49588,P49736,P49917,P50613,P50990,P50991,P61081,P62256,P78368,P78371,P78527…
3	GO:0043515	kinetochore binding	Molecular Function	1	Q9H3R5
3	GO:0044877	protein-containing complex binding	Molecular Function	57	P04637,P49458,O60749,Q13596,Q15582,O43747,P11142,P62258,P11171,O60264,P28370,Q9Y3T9,O75367,P07305,P16403,Q92522,P04899,O00541,P05386,Q02880,Q14137,Q15910,P11021,P42345,P46379,Q8NE71,Q8WWC4,O60524,P06748,Q9NTK5,Q96EY7,O00160,Q13459,Q66K74,Q86VI3,Q8WZ42,Q9Y613,Q16186,Q92558,Q92552,Q92845,Q86VM9,P62750,Q9Y4F3,Q96EB6,Q8NB90,Q9BZE4,O15111,O43933,O95817,P01111,P07437,P42898,Q01831,Q13617,Q16531,Q16795
3	GO:0046790	virion binding	Molecular Function	1	Q9H2X3
3	GO:0048038	quinone binding	Molecular Function	1	Q9BQB6
3	GO:0050840	extracellular matrix binding	Molecular Function	1	Q15582
3	GO:0070025	carbon monoxide binding	Molecular Function	1	P35520
3	GO:0070026	nitric oxide binding	Molecular Function	1	P35520
3	GO:0072341	modified amino acid binding	Molecular Function	4	P11142,Q9P0L2,P35520,P42898
3	GO:0097159	organic cyclic compound binding	Molecular Function	329	O43592,O60524,O60841,P05455,P18077,P49588,Q13325,Q7Z2T5,Q92552,Q9H0A0,Q9Y2Z4,Q01780,O75367,Q01831,O95817,P04637,P18847,P20226,P38398,P49711,P52952,P42224,Q3KP31,Q8TF47,Q8WY36,Q96QR8,Q99459,Q9Y483,Q9Y6Q3,O15198,O95625,P11387,P51814,Q09028,Q15022,Q15648,Q15776,Q15910,Q32MZ4,Q6ZN55,Q8TF39,Q96EB6,Q96K58,P42345,O00411,P06748,P17480,Q53T94,Q7L2E3,P67809,Q504Q3,Q7Z569,Q99551,Q9H5U6,O15160,O43422,O60216,…
3	GO:0097367	carbohydrate derivative binding	Molecular Function	104	A0A6Q8PFA6,O00160,O14730,O15067,O15111,O43933,O60264,O95573,P08243,P10398,P11021,P11142,P11387,P15104,P17066,P17987,P19525,P20585,P27361,P28288,P28370,P35250,P35251,P38646,P40227,P41743,P42345,P49368,P49588,P49736,P49917,P50613,P50990,P50991,P61081,P62256,P78362,P78368,P78371,P78527,Q02880,Q07002,Q13459,Q13523,Q14807,Q149N8,Q38SD2,Q6IA69,Q6P158,Q7L2E3,Q8IY37,Q8IYT4,Q8NB90,Q8NBU5,Q8NE71,Q8NHQ9,Q8N…
3	GO:0140272	exogenous protein binding	Molecular Function	3	P30825,Q15758,Q9H2X3
3	GO:1901363	heterocyclic compound binding	Molecular Function	329	O43592,O60524,O60841,P05455,P18077,P49588,Q13325,Q7Z2T5,Q92552,Q9H0A0,Q9Y2Z4,Q01780,O75367,Q01831,O95817,P04637,P18847,P20226,P38398,P49711,P52952,P42224,Q3KP31,Q8TF47,Q8WY36,Q96QR8,Q99459,Q9Y483,Q9Y6Q3,O15198,O95625,P11387,P51814,Q09028,Q15022,Q15648,Q15776,Q15910,Q32MZ4,Q6ZN55,Q8TF39,Q96EB6,Q96K58,P42345,O00411,P06748,P17480,Q53T94,Q7L2E3,P67809,Q504Q3,Q7Z569,Q99551,Q9H5U6,O15160,O43422,O60216,…
3	GO:1901681	sulfur compound binding	Molecular Function	4	P35268,P47914,P35520,Q9H5U6
3	GO:0140662	ATP-dependent protein folding chaperone	Molecular Function	11	P11021,P11142,P17066,P17987,P38646,P40227,P49368,P50990,P50991,P78371,Q99832
3	GO:0004694	eukaryotic translation initiation factor 2alpha kinase activity	Molecular Function	1	P19525
3	GO:0030371	translation repressor activity	Molecular Function	1	Q2Q1W2
3	GO:0090079	translation regulator activity, nucleic acid binding	Molecular Function	4	O60841,Q13144,Q14232,Q8NE71
3	GO:0038023	signaling receptor activity	Molecular Function	10	Q9NQS5,Q14831,Q8NGH5,Q9BT40,P39086,Q9H2X3,B7ZLD0,Q08722,Q15758,Q9P2E9
3	GO:0030674	protein-macromolecule adaptor activity	Molecular Function	19	O15498,P78559,Q9NYB9,Q6SZW1,O43747,Q6IAA8,P06748,Q9UER7,Q9UJX3,Q9HAN9,A7E2V4,Q9Y4B6,P11142,Q13428,Q13617,Q15054,Q16531,Q86VM9,Q9P253
3	GO:0003925	G protein activity	Molecular Function	1	P01111
3	GO:0016247	channel regulator activity	Molecular Function	2	P62258,Q9UKS6
3	GO:0030234	enzyme regulator activity	Molecular Function	42	P49407,P06748,O94887,Q13144,Q14155,Q15042,Q8TER5,Q92974,Q9HCU5,Q9Y6D5,A7KAX9,Q13459,Q86VI3,Q86X10,Q8IZ81,Q8TC07,Q9BTW9,Q9UPQ3,O75569,P35251,Q15022,Q9UKL3,Q14831,P19525,P30153,P63151,Q13362,Q14738,Q8TF05,O75367,P05386,Q9UER7,O95373,Q562E7,P04637,Q96CS3,P61289,Q16186,Q06587,P46777,P61927,Q9UI12
3	GO:0060590	ATPase regulator activity	Molecular Function	1	O95817
3	GO:0140677	molecular function activator activity	Molecular Function	2	Q8IXB1,P04637
3	GO:0140678	molecular function inhibitor activity	Molecular Function	3	Q9UKS6,Q9UER7,Q16186
3	GO:0140142	nucleocytoplasmic carrier activity	Molecular Function	7	O14980,Q9UIA9,O60518,P52292,Q96P70,Q9UI26,Q9Y5L0
3	GO:0140597	protein carrier chaperone	Molecular Function	5	Q9NZJ7,Q13610,Q96P70,O95817,P11142
3	GO:0003700	DNA-binding transcription factor activity	Molecular Function	25	O15198,O95625,P04637,P18847,P42224,P51814,P52952,Q15776,Q32MZ4,Q3KP31,Q8TF39,Q8WY36,Q96QR8,Q99459,Q9Y2D9,P49711,Q8TF47,Q96K58,Q9Y6Q3,Q6ZN55,Q2TB10,Q8N1G0,Q92610,Q96ME7,Q9ULD5
3	GO:0003712	transcription coregulator activity	Molecular Function	24	O75475,P06748,P29590,P38398,P49407,P49848,Q01831,Q15648,Q96EB6,Q9NPJ6,Q9UER7,Q15910,Q6IAN0,Q8TDD1,Q96IZ0,Q96T58,Q9BQ70,Q9BQG0,Q9UDR5,Q9UIV1,Q9UKL3,Q9UMX1,Q9Y3T9,Q13643
3	GO:0000995	RNA polymerase III general transcription initiation factor activity	Molecular Function	4	P20226,Q12789,Q8WUA4,Q9Y5Q9
3	GO:0001181	RNA polymerase I general transcription initiation factor activity	Molecular Function	1	P17480
3	GO:0016251	RNA polymerase II general transcription initiation factor activity	Molecular Function	2	P20226,P49848
3	GO:0140612	DNA damage sensor activity	Molecular Function	2	P20585,Q01831
3	GO:0140311	protein sequestering activity	Molecular Function	1	P62258
3	GO:0140487	metal ion sequestering activity	Molecular Function	1	P02794
3	GO:0004386	helicase activity	Molecular Function	18	Q7L2E3,Q96RR1,Q6P158,Q8IY37,Q8NHQ9,Q8TDD1,Q96GQ7,Q9BQ39,Q9GZR7,Q9H0S4,Q9NR30,Q9NVP1,Q9HCE1,Q9H6S0,O60264,P28370,P49736,Q149N8
3	GO:0008094	ATP-dependent activity, acting on DNA	Molecular Function	10	Q7L2E3,Q96RR1,P35251,Q02880,Q96QE3,O60264,P28370,Q149N8,P20585,P50613
3	GO:0008186	ATP-dependent activity, acting on RNA	Molecular Function	13	Q6P158,Q7L2E3,Q8IY37,Q8NHQ9,Q8TDD1,Q96GQ7,Q9BQ39,Q9GZR7,Q9H0S4,Q9NR30,Q9NVP1,Q9HCE1,Q9H6S0
3	GO:0008568	microtubule-severing ATPase activity	Molecular Function	1	Q8IYT4
3	GO:0015645	fatty acid ligase activity	Molecular Function	1	O95573
3	GO:0016887	ATP hydrolysis activity	Molecular Function	43	O43933,O60264,P11021,P11142,P17066,P17987,P28288,P35250,P35251,P38646,P40227,P49368,P49736,P50990,P50991,P78371,Q13459,Q14807,Q6P158,Q7L2E3,Q8IY37,Q8IYT4,Q8NB90,Q8NBU5,Q8NE71,Q8NHQ9,Q8NI77,Q8TDD1,Q96GQ7,Q96Q89,Q96QE3,Q96RR1,Q99832,Q9BQ39,Q9GZR7,Q9H0S4,Q9H6S0,Q9HCE1,Q9HCN4,Q9NR30,Q9NTK5,Q9NVP1,Q9NYC9
3	GO:0036310	ATP-dependent DNA/DNA annealing activity	Molecular Function	2	P04637,P28370
3	GO:0042626	ATPase-coupled transmembrane transporter activity	Molecular Function	2	Q9UI12,P28288
3	GO:0070463	tubulin-dependent ATPase activity	Molecular Function	1	Q8NI77
3	GO:0140545	protein disaggregase activity	Molecular Function	1	P11142
3	GO:0140567	transmembrane protein dislocase activity	Molecular Function	1	Q8NBU5
3	GO:1990833	clathrin-uncoating ATPase activity	Molecular Function	1	P11142
4	GO:0008569	minus-end-directed microtubule motor activity	Molecular Function	1	Q9NYC9
4	GO:0008574	plus-end-directed microtubule motor activity	Molecular Function	2	Q8NI77,Q96Q89
4	GO:0004016	adenylate cyclase activity	Molecular Function	1	Q96PN6
4	GO:0009055	electron transfer activity	Molecular Function	1	Q16795
4	GO:0016614	oxidoreductase activity, acting on CH-OH group of donors	Molecular Function	3	Q6IAN0,P43304,Q9BQB6
4	GO:0016627	oxidoreductase activity, acting on the CH-CH group of donors	Molecular Function	2	P11310,Q9UBM7
4	GO:0016645	oxidoreductase activity, acting on the CH-NH group of donors	Molecular Function	2	P42898,Q9UDR5
4	GO:0016651	oxidoreductase activity, acting on NAD(P)H	Molecular Function	1	Q16795
4	GO:0016661	oxidoreductase activity, acting on other nitrogenous compounds as donors	Molecular Function	1	P35520
4	GO:0016667	oxidoreductase activity, acting on a sulfur group of donors	Molecular Function	1	Q8IXB1
4	GO:0016705	oxidoreductase activity, acting on paired donors, with incorporation or reduction of molecular oxygen	Molecular Function	1	Q9NVH6
4	GO:0016722	oxidoreductase activity, acting on metal ions	Molecular Function	1	P02794
4	GO:0051213	dioxygenase activity	Molecular Function	1	Q9NVH6
4	GO:0016741	transferase activity, transferring one-carbon groups	Molecular Function	17	Q9UNQ2,O60725,Q7Z2T5,Q9NQV6,Q7L2J0,Q99707,B2RD09,O43159,Q9H5U6,P46087,Q96P11,Q15910,Q9BVS5,Q6IN84,Q96GJ1,Q15022,O96028
4	GO:0016746	acyltransferase activity	Molecular Function	7	P50416,Q56NI9,Q9H0A0,O15498,P15104,Q96PB1,Q96EB6
4	GO:0016757	glycosyltransferase activity	Molecular Function	2	Q8NAT1,Q92839
4	GO:0016769	transferase activity, transferring nitrogenous groups	Molecular Function	1	Q06210
4	GO:0016772	transferase activity, transferring phosphorus-containing groups	Molecular Function	33	Q9HAN9,O15160,Q9Y6K5,Q8NDF8,O00411,P52434,Q4G0F4,Q9H1D9,Q9H9Y6,Q9NW08,O15111,P10398,P19525,P41743,P42345,P50613,P78527,Q13523,Q8TD08,Q96SB4,O14730,P11387,P27361,P78362,P78368,Q38SD2,Q8WZ42,Q9P0L2,P46020,Q07002,Q9BWH6,Q5TAX3,Q9Y4B6
4	GO:0016782	transferase activity, transferring sulphur-containing groups	Molecular Function	1	Q16762
4	GO:0019787	ubiquitin-like protein transferase activity	Molecular Function	22	O95376,P38398,P61081,P62256,Q13617,Q149N8,Q2Q1W2,Q5TA31,Q75N03,Q7Z569,Q9UJX2,Q9UJX5,Q9UMS4,Q9Y4D8,Q9Y4X5,P29590,Q06587,Q15648,Q96DX7,Q96JN8,Q9P253,O94874
4	GO:0008233	peptidase activity	Molecular Function	9	Q6UB28,Q93009,Q99797,P48147,Q4J6C6,O00507,Q96K76,Q96RU2,Q8TCT9
4	GO:0016788	hydrolase activity, acting on ester bonds	Molecular Function	22	O00411,Q01780,Q06265,Q504Q3,Q9UIV1,P49588,P19174,Q9BT40,Q96AY2,Q9H8Y5,O75817,O95707,Q9Y4F3,Q8IY17,P67775,Q14738,O00743,P30153,Q12923,Q9H857,Q8IXW5,P28288
4	GO:0016798	hydrolase activity, acting on glycosyl bonds	Molecular Function	2	Q6SZW1,O60502
4	GO:0016810	hydrolase activity, acting on carbon-nitrogen (but not peptide) bonds	Molecular Function	4	Q9NRW3,Q6IA69,Q96EB6,Q9BPU6
4	GO:0016817	hydrolase activity, acting on acid anhydrides	Molecular Function	51	A4D1E9,O60841,P01111,P04899,P07437,Q16181,Q9BZE4,Q9HCN4,Q9UPQ3,O43933,O60264,P11021,P11142,P17066,P17987,P28288,P35250,P35251,P38646,P40227,P49368,P49736,P50990,P50991,P78371,Q13459,Q14807,Q6P158,Q7L2E3,Q8IY37,Q8IYT4,Q8NB90,Q8NBU5,Q8NE71,Q8NHQ9,Q8NI77,Q8TDD1,Q96GQ7,Q96Q89,Q96QE3,Q96RR1,Q99832,Q9BQ39,Q9GZR7,Q9H0S4,Q9H6S0,Q9HCE1,Q9NR30,Q9NTK5,Q9NVP1,Q9NYC9
4	GO:0017171	serine hydrolase activity	Molecular Function	2	P48147,Q4J6C6
4	GO:0019213	deacetylase activity	Molecular Function	1	Q96EB6
4	GO:0019239	deaminase activity	Molecular Function	1	Q9NRW3
4	GO:0016835	carbon-oxygen lyase activity	Molecular Function	1	P35520
4	GO:0016849	phosphorus-oxygen lyase activity	Molecular Function	1	Q96PN6
4	GO:0003916	DNA topoisomerase activity	Molecular Function	2	P11387,Q02880
4	GO:0016859	cis-trans isomerase activity	Molecular Function	2	Q13427,Q5T1M5
4	GO:0016866	intramolecular transferase activity	Molecular Function	1	Q8N0Z8
4	GO:0016872	intramolecular lyase activity	Molecular Function	1	Q9NPH2
4	GO:0016875	ligase activity, forming carbon-oxygen bonds	Molecular Function	2	P49588,Q9Y2Z4
4	GO:0016877	ligase activity, forming carbon-sulfur bonds	Molecular Function	2	O95573,Q13564
4	GO:0016879	ligase activity, forming carbon-nitrogen bonds	Molecular Function	4	Q6IA69,P08243,P15104,O15067
4	GO:0016885	ligase activity, forming carbon-carbon bonds	Molecular Function	1	Q9HCC0
4	GO:0016886	ligase activity, forming phosphoric ester bonds	Molecular Function	1	P49917
4	GO:0003755	peptidyl-prolyl cis-trans isomerase activity	Molecular Function	2	Q13427,Q5T1M5
4	GO:0004672	protein kinase activity	Molecular Function	21	O14730,O15111,P10398,P11387,P19525,P27361,P41743,P42345,P50613,P78362,P78368,P78527,Q13523,Q38SD2,Q8TD08,Q8WZ42,Q96SB4,Q9P0L2,P46020,Q07002,Q9Y4B6
4	GO:0004721	phosphoprotein phosphatase activity	Molecular Function	6	O00743,P30153,P67775,Q12923,Q8IXW5,Q14738
4	GO:0008276	protein methyltransferase activity	Molecular Function	4	O60725,Q15910,Q15022,O96028
4	GO:0008641	ubiquitin-like modifier activating enzyme activity	Molecular Function	1	Q13564
4	GO:0015035	protein-disulfide reductase activity	Molecular Function	1	Q8IXB1
4	GO:0019707	protein-cysteine S-acyltransferase activity	Molecular Function	2	O15498,P15104
4	GO:0033558	protein lysine deacetylase activity	Molecular Function	1	Q96EB6
4	GO:0061733	peptide-lysine-N-acetyltransferase activity	Molecular Function	1	Q56NI9
4	GO:0097363	protein O-GlcNAc transferase activity	Molecular Function	1	Q8NAT1
4	GO:0140097	catalytic activity, acting on DNA	Molecular Function	13	Q7L2E3,Q96RR1,P35251,Q8NDF8,P49917,P11387,Q02880,O60264,P50613,Q96QE3,P28370,Q149N8,P20585
4	GO:0140098	catalytic activity, acting on RNA	Molecular Function	40	O00411,Q01780,Q06265,Q504Q3,Q9UIV1,Q9UNQ2,O15160,P49588,Q6P158,Q7L2E3,Q8IY37,Q8NHQ9,Q8TDD1,Q96GQ7,Q9BQ39,Q9GZR7,Q9H0S4,Q9NR30,Q9NVP1,P52434,Q4G0F4,Q9H1D9,Q9H9Y6,Q9NW08,Q9H8Y5,O75817,O95707,Q9Y4F3,Q7Z2T5,Q9Y2Z4,Q7L2J0,Q9H5U6,P46087,Q96P11,Q9BVS5,Q6IN84,Q96GJ1,Q9HCE1,Q9H6S0,Q5TAX3
4	GO:0005324	long-chain fatty acid transporter activity	Molecular Function	1	P28288
4	GO:0005548	phospholipid transporter activity	Molecular Function	1	Q7Z3C6
4	GO:0140303	intramembrane lipid transporter activity	Molecular Function	1	Q7Z3C6
4	GO:0005342	organic acid transmembrane transporter activity	Molecular Function	5	P30825,Q9H2H9,Q9UJS0,Q15758,Q9BWM7
4	GO:0015075	ion transmembrane transporter activity	Molecular Function	8	P30825,Q9H2H9,Q9UJS0,Q6P4Q7,Q15758,P39086,Q9BWM7,Q9UI12
4	GO:0015318	inorganic molecular entity transmembrane transporter activity	Molecular Function	4	Q9H2H9,Q6P4Q7,P39086,Q9UI12
4	GO:0022803	passive transmembrane transporter activity	Molecular Function	2	P39086,Q15758
4	GO:0022804	active transmembrane transporter activity	Molecular Function	5	Q9H2H9,Q16795,Q15758,P28288,Q9UI12
4	GO:1901474	azole transmembrane transporter activity	Molecular Function	1	P30825
4	GO:0031490	chromatin DNA binding	Molecular Function	8	O75367,P07305,P16403,Q92522,P49711,Q15022,Q15648,Q15910
4	GO:0031491	nucleosome binding	Molecular Function	7	O75367,P07305,P16403,Q92522,O60264,P28370,Q9Y3T9
4	GO:1990841	promoter-specific chromatin binding	Molecular Function	7	O75367,P04637,P42224,Q15022,Q15648,Q15910,Q96EB6
4	GO:0042605	peptide antigen binding	Molecular Function	1	Q9H2X3
4	GO:1990405	protein antigen binding	Molecular Function	1	P30153
4	GO:0000149	SNARE binding	Molecular Function	2	Q08379,Q9P253
4	GO:0001098	basal transcription machinery binding	Molecular Function	2	P20226,P04637
4	GO:0002039	p53 binding	Molecular Function	7	P04637,P38398,P42858,P61289,Q93009,Q96EB6,Q9UER7
4	GO:0005102	signaling receptor binding	Molecular Function	25	P04899,P11142,P49407,Q9UKL3,O60749,Q13596,P42224,Q9BUZ4,Q9NXR7,P19174,Q96RT1,Q15582,P20226,P49848,P04637,Q9Y5X3,Q9UNH7,P07437,Q15648,Q13459,P67775,Q9Y6D5,O15111,P46379,Q8TDD1
4	GO:0005516	calmodulin binding	Molecular Function	9	I3L213,O00160,P11171,P46020,Q02952,Q13459,Q86VI3,Q8WZ42,Q93100
4	GO:0005522	profilin binding	Molecular Function	1	P42858
4	GO:0008013	beta-catenin binding	Molecular Function	1	Q9UMX1
4	GO:0008092	cytoskeletal protein binding	Molecular Function	50	A0A0A0MRA8,A0A590UJG2,D3DPU2,O00160,P11171,P40123,P57737,P78559,Q01518,Q13459,Q13643,Q5T1M5,Q66K74,Q8NI77,Q92558,Q96IZ0,Q9NQA3,Q9P253,A0A6Q8PFA6,P49754,Q08379,Q14807,Q7Z4H7,Q8IYT4,Q92974,Q96BD8,Q96Q89,Q96SI9,Q9BT25,Q9BXS6,Q9GZM8,Q9NYZ3,P38398,Q9Y6D5,O43747,Q92845,Q8WZ42,P42858,Q9UNH7,Q9Y5X3,Q15813,Q14155,P67775,Q9P0L2,Q9BTW9,Q86VI3,Q9Y613,Q96QZ7,O94887,Q9UKS6
4	GO:0008134	transcription factor binding	Molecular Function	35	P20226,P04637,P42345,P49711,P42224,Q15022,Q15370,Q15910,Q9Y483,Q15648,Q96EB6,Q9UIF9,Q53T94,P49848,Q8TDD1,Q9Y4B6,P06748,Q9NPJ6,Q86XI2,P32780,Q9UER7,O94888,P28370,P52952,P78527,Q01831,Q06265,Q96T58,O60216,O75475,P27361,Q6IAN0,Q96QR8,Q9UIV1,Q9Y3T9
4	GO:0017147	Wnt-protein binding	Molecular Function	1	B7ZLD0
4	GO:0019838	growth factor binding	Molecular Function	1	P15880
4	GO:0019899	enzyme binding	Molecular Function	99	P04637,Q16186,Q8WZ42,Q96RR1,P40123,Q01518,Q02952,P42858,Q9NYB9,O75367,O94874,O95573,P06748,P19174,P50851,P62753,P68366,Q08379,Q14155,Q9BUZ4,Q9UER7,Q9UMX1,Q9Y4P3,A8K8P3,P27361,P62258,Q92845,Q9UJX3,Q9UJX4,Q9UJX5,O14980,O15397,O43592,O43747,O95373,Q13459,Q15042,Q86VI3,Q92974,Q96F07,Q96P70,Q9UI26,Q9UIA9,Q9Y5L0,O95376,Q9UBW7,Q9Y4X5,A8K9U1,O94888,P07437,P11021,P11142,P17066,P17987,P29590,P35520,P38398,…
4	GO:0019904	protein domain specific binding	Molecular Function	24	Q8TD08,Q9NYB9,Q14831,P19338,Q92610,Q96EB6,Q96IZ0,Q15648,Q96Q89,Q9BUZ4,P11142,P40227,Q16531,Q96K76,Q99459,P04637,O95573,P07437,P11021,P11387,P35251,P62258,P78527,Q9Y613
4	GO:0030276	clathrin binding	Molecular Function	1	O43747
4	GO:0030742	GTP-dependent protein binding	Molecular Function	1	O43747
4	GO:0031072	heat shock protein binding	Molecular Function	10	P46379,Q8IXB1,Q9NXW2,P11021,P11142,P17066,P38646,P42858,Q8WXX5,Q9UER7
4	GO:0031369	translation initiation factor binding	Molecular Function	3	P62847,Q13144,Q9Y4P3
4	GO:0032182	ubiquitin-like protein binding	Molecular Function	5	P29590,Q9UKL3,O94888,Q14596,Q96CS3
4	GO:0032794	GTPase activating protein binding	Molecular Function	1	P07437
4	GO:0042393	histone binding	Molecular Function	24	O43159,Q15022,Q86XI2,Q9Y483,Q96EB6,Q9UIF9,Q13610,O95373,P06748,P35659,P39687,P42224,P49736,Q09028,Q13112,Q15020,Q8IXK0,Q8WXX5,Q92688,Q96P70,Q9BQ67,Q9UDR5,Q9UER7,Q9Y3T9
4	GO:0042802	identical protein binding	Molecular Function	65	O15111,O60749,O75569,P06748,P18847,P28288,P29590,P35520,P42224,P52952,Q13596,Q32MZ4,Q8TCT9,Q96Q89,Q9UER7,Q9UL63,Q9UNH7,Q9Y2Z4,O60502,P02792,P02794,P04637,P11310,P15104,P18124,P19338,P19525,P27361,P35268,P38398,P40123,P42345,P42858,P46379,P49754,P50416,P61289,P62258,Q08379,Q14232,Q15582,Q16181,Q38SD2,Q66K74,Q6SZW1,Q75N03,Q7Z569,Q8IXK0,Q8WZ42,Q92839,Q96EB6,Q96RR1,Q99459,Q99961,Q9BUZ4,Q9GZM8,Q9HAN9,…
4	GO:0043548	phosphatidylinositol 3-kinase binding	Molecular Function	1	Q12923
4	GO:0043560	insulin receptor substrate binding	Molecular Function	2	P19338,Q92610
4	GO:0043621	protein self-association	Molecular Function	4	P04637,P28288,Q8WZ42,Q9Y613
4	GO:0044325	transmembrane transporter binding	Molecular Function	2	P42858,P62258
4	GO:0045505	dynein intermediate chain binding	Molecular Function	3	O95817,P42858,Q9NYC9
4	GO:0046332	SMAD binding	Molecular Function	5	O00507,O15198,O95373,P29590,Q96QR8
4	GO:0046983	protein dimerization activity	Molecular Function	30	O15111,O60749,O75569,P06748,P18847,P28288,P29590,P35520,P42224,P52952,Q13596,Q32MZ4,Q8TCT9,Q96Q89,Q9UER7,Q9UL63,Q9UNH7,Q9Y2Z4,O75367,P04637,P30153,P49848,P62258,P67775,Q13428,Q13564,Q86X10,O15160,O43422,Q14831
4	GO:0048306	calcium-dependent protein binding	Molecular Function	1	Q9H2X3
4	GO:0050839	cell adhesion molecule binding	Molecular Function	27	Q15582,O15498,O60749,O95817,P11021,P11142,P15880,P42224,P47914,P49207,P50914,P50990,P62258,P62424,P62750,P83731,Q02878,Q08379,Q13596,Q16181,Q32MZ4,Q7Z2W4,Q92522,Q99961,Q9NTK5,Q9Y5X3,Q08722
4	GO:0051018	protein kinase A binding	Molecular Function	3	Q92558,Q9Y6D5,Q02952
4	GO:0051082	unfolded protein binding	Molecular Function	14	P06748,P11021,P11142,P17066,P17987,P27824,P38646,P40227,P49368,P50990,P50991,P78371,Q13112,Q99832
4	GO:0051087	chaperone binding	Molecular Function	8	O95817,P04637,P11021,P11142,Q15813,Q8IXB1,Q8WXX5,Q9BTW9
4	GO:0051219	phosphoprotein binding	Molecular Function	5	P27361,P62258,P11171,P42345,Q9Y4P3
4	GO:0051787	misfolded protein binding	Molecular Function	3	P11021,P46379,Q8IXB1
4	GO:0051959	dynein light intermediate chain binding	Molecular Function	1	Q9NYC9
4	GO:0061676	importin-alpha family protein binding	Molecular Function	1	Q08379
4	GO:0070064	proline-rich region binding	Molecular Function	1	Q9NYB9
4	GO:0071889	14-3-3 protein binding	Molecular Function	2	P04637,P78362
4	GO:0097110	scaffold protein binding	Molecular Function	4	O15111,P17480,P62258,Q13428
4	GO:0097371	MDM2/MDM4 family protein binding	Molecular Function	3	P04637,P61289,P61927
4	GO:0097602	cullin family protein binding	Molecular Function	1	Q16531
4	GO:0140030	modification-dependent protein binding	Molecular Function	14	P46379,Q9NXR7,O43159,Q15022,Q86XI2,Q9Y483,Q562E7,Q96EB6,Q9UIF9,O43933,P29590,Q9UER7,O75367,Q13610
4	GO:1990763	arrestin family protein binding	Molecular Function	1	P49407
4	GO:0005543	phospholipid binding	Molecular Function	12	P11142,Q9P0L2,P11171,Q9Y5X3,Q96L92,O60749,Q13596,Q9UNH7,A7KAX9,P41743,Q9UKS6,Q9UPQ3
4	GO:0048029	monosaccharide binding	Molecular Function	1	Q9H2X3
4	GO:0042277	peptide binding	Molecular Function	7	Q9NXR7,O60518,P52292,Q7Z569,Q13427,P37108,Q9H2X3
4	GO:0000166	nucleotide binding	Molecular Function	104	O95817,A0A6Q8PFA6,O00160,O14730,O15067,O15111,O43933,O60264,O95573,P08243,P10398,P11021,P11142,P11387,P15104,P17066,P17987,P19525,P20585,P27361,P28288,P28370,P35250,P35251,P38646,P40227,P41743,P42345,P49368,P49588,P49736,P49917,P50613,P50990,P50991,P61081,P62256,P78362,P78368,P78371,P78527,Q02880,Q07002,Q13459,Q13523,Q14807,Q149N8,Q38SD2,Q6IA69,Q6P158,Q7L2E3,Q8IY37,Q8IYT4,Q8NB90,Q8NBU5,Q8NE71,Q8N…
4	GO:0001882	nucleoside binding	Molecular Function	2	Q9H9Y6,Q9NW08
4	GO:0019825	oxygen binding	Molecular Function	1	P35520
4	GO:0019842	vitamin binding	Molecular Function	2	P35520,Q99707
4	GO:0043177	organic acid binding	Molecular Function	3	Q14831,P49588,Q9Y2Z4
4	GO:0043168	anion binding	Molecular Function	105	A0A6Q8PFA6,O00160,O14730,O15067,O15111,O43933,O60264,O95573,P08243,P10398,P11021,P11142,P11387,P15104,P17066,P17987,P19525,P20585,P27361,P28288,P28370,P35250,P35251,P38646,P40227,P41743,P42345,P49368,P49588,P49736,P49917,P50613,P50990,P50991,P61081,P62256,P78362,P78368,P78371,P78527,Q02880,Q07002,Q13459,Q13523,Q14807,Q149N8,Q38SD2,Q6IA69,Q6P158,Q7L2E3,Q8IY37,Q8IYT4,Q8NB90,Q8NBU5,Q8NE71,Q8NHQ9,Q8N…
4	GO:0043169	cation binding	Molecular Function	116	A4D1E9,P78362,Q96PN6,Q96SB4,Q9P0L2,P02792,P02794,Q9NVH6,P04637,A0A590UJG2,P11021,P19174,P27824,P43304,P62760,Q14831,Q8WZ42,Q9UJS0,A7E2V4,O60941,O95376,P29590,P38398,P49588,P49711,Q14596,Q2Q1W2,Q5F1R6,Q5TAX3,Q6ZN17,Q7Z569,Q8IXK0,Q92974,Q96DX7,Q99707,Q9BUZ4,Q9H5U6,Q9NP64,Q9NRW3,Q9UBW7,Q9Y4X5,Q9Y6Q3,Q9UL16,O00743,O14730,O15067,O15198,O43422,O60841,O95625,O96028,P04899,P07437,P10398,P15104,P35520,P41…
4	GO:0001094	TFIID-class transcription factor complex binding	Molecular Function	1	P04637
4	GO:0005158	insulin receptor binding	Molecular Function	2	O60749,Q13596
4	GO:0005178	integrin binding	Molecular Function	1	Q15582
4	GO:0005518	collagen binding	Molecular Function	2	O43747,Q15582
4	GO:0019215	intermediate filament binding	Molecular Function	1	Q96EB6
4	GO:0023023	MHC protein complex binding	Molecular Function	2	P11142,P62258
4	GO:0030507	spectrin binding	Molecular Function	1	P11171
4	GO:0031683	G-protein beta/gamma-subunit complex binding	Molecular Function	1	P04899
4	GO:0043021	ribonucleoprotein complex binding	Molecular Function	18	P49458,P11021,P42345,P46379,Q8NE71,Q8WWC4,O60524,P06748,Q9NTK5,Q96EY7,Q92552,Q8NB90,Q9BZE4,O00541,P05386,Q02880,Q14137,Q15910
4	GO:0051015	actin filament binding	Molecular Function	6	O00160,Q13459,Q66K74,Q86VI3,Q8WZ42,Q9Y613
4	GO:0070628	proteasome binding	Molecular Function	2	P46379,Q16186
4	GO:0071933	Arp2/3 complex binding	Molecular Function	1	Q92558
4	GO:0120170	intraciliary transport particle B binding	Molecular Function	1	Q92845
4	GO:0140262	mRNA cap binding complex binding	Molecular Function	1	Q86VM9
4	GO:1904841	TORC2 complex binding	Molecular Function	1	P62750
4	GO:1905762	CCR4-NOT complex binding	Molecular Function	1	Q9Y4F3
4	GO:0001786	phosphatidylserine binding	Molecular Function	2	P11142,Q9P0L2
4	GO:0003676	nucleic acid binding	Molecular Function	273	O43592,O60524,O60841,P05455,P18077,P49588,Q13325,Q7Z2T5,Q92552,Q9H0A0,Q9Y2Z4,O75367,Q01831,P04637,P18847,P20226,P38398,P49711,P52952,P42224,Q3KP31,Q8TF47,Q8WY36,Q96QR8,Q99459,Q9Y483,Q9Y6Q3,O15198,O95625,P11387,P51814,Q09028,Q15022,Q15648,Q15776,Q15910,Q32MZ4,Q6ZN55,Q8TF39,Q96EB6,Q96K58,P42345,O00411,P06748,P17480,Q53T94,Q7L2E3,O15160,O43422,O60216,O60264,O75717,P18124,P28370,P29590,P35250,P35251,…
4	GO:0046906	tetrapyrrole binding	Molecular Function	2	P35520,Q99707
4	GO:0070279	vitamin B6 binding	Molecular Function	1	P35520
4	GO:0072545	tyrosine binding	Molecular Function	1	Q9Y2Z4
4	GO:0072570	ADP-D-ribose binding	Molecular Function	1	O75367
4	GO:1901265	nucleoside phosphate binding	Molecular Function	104	Q01780,O95817,A0A6Q8PFA6,O00160,O14730,O15067,O15111,O43933,O60264,O95573,P08243,P10398,P11021,P11142,P11387,P15104,P17066,P17987,P19525,P20585,P27361,P28288,P28370,P35250,P35251,P38646,P40227,P41743,P42345,P49368,P49588,P49736,P49917,P50613,P50990,P50991,P61081,P62256,P78362,P78368,P78371,P78527,Q02880,Q07002,Q13459,Q13523,Q14807,Q149N8,Q38SD2,Q6IA69,Q6P158,Q7L2E3,Q8IY37,Q8IYT4,Q8NB90,Q8NBU5,Q8N…
4	GO:0005539	glycosaminoglycan binding	Molecular Function	2	P35268,P47914
4	GO:0032553	ribonucleotide binding	Molecular Function	98	A0A6Q8PFA6,O00160,O14730,O15067,O15111,O43933,O60264,O95573,P08243,P10398,P11021,P11142,P11387,P15104,P17066,P17987,P19525,P20585,P27361,P28288,P28370,P35250,P35251,P38646,P40227,P41743,P42345,P49368,P49588,P49736,P49917,P50613,P50990,P50991,P61081,P62256,P78362,P78368,P78371,P78527,Q02880,Q07002,Q13459,Q13523,Q14807,Q149N8,Q38SD2,Q6IA69,Q6P158,Q7L2E3,Q8IY37,Q8IYT4,Q8NB90,Q8NBU5,Q8NE71,Q8NHQ9,Q8N…
4	GO:0001618	virus receptor activity	Molecular Function	3	P30825,Q15758,Q9H2X3
4	GO:0008201	heparin binding	Molecular Function	2	P35268,P47914
4	GO:1904047	S-adenosyl-L-methionine binding	Molecular Function	2	P35520,Q9H5U6
4	GO:0008135	translation factor activity, RNA binding	Molecular Function	4	O60841,Q13144,Q14232,Q8NE71
4	GO:0008494	translation activator activity	Molecular Function	1	Q8NE71
4	GO:0001653	peptide receptor activity	Molecular Function	2	Q9NQS5,Q9BT40
4	GO:0004888	transmembrane signaling receptor activity	Molecular Function	7	Q9NQS5,Q14831,Q8NGH5,Q9BT40,P39086,Q9H2X3,B7ZLD0
4	GO:0015026	coreceptor activity	Molecular Function	1	B7ZLD0
4	GO:0030594	neurotransmitter receptor activity	Molecular Function	1	P39086
4	GO:0070053	thrombospondin receptor activity	Molecular Function	1	Q08722
4	GO:0005484	SNAP receptor activity	Molecular Function	1	O15498
4	GO:0008093	cytoskeletal anchor activity	Molecular Function	2	P78559,Q9NYB9
4	GO:0035591	signaling adaptor activity	Molecular Function	2	Q6SZW1,Q9NYB9
4	GO:0043495	protein-membrane adaptor activity	Molecular Function	1	Q6IAA8
4	GO:0140312	cargo adaptor activity	Molecular Function	1	O43747
4	GO:0140693	molecular condensate scaffold activity	Molecular Function	2	P06748,Q9UER7
4	GO:0140767	enzyme-substrate adaptor activity	Molecular Function	4	Q9HAN9,A7E2V4,Q9Y4B6,Q9UJX3
4	GO:0016248	channel inhibitor activity	Molecular Function	1	Q9UKS6
4	GO:0099106	ion channel regulator activity	Molecular Function	2	P62258,Q9UKS6
4	GO:0004857	enzyme inhibitor activity	Molecular Function	7	P06748,Q14831,O75367,Q96CS3,P46777,P61927,P49407
4	GO:0008047	enzyme activator activity	Molecular Function	22	A7KAX9,P49407,Q13459,Q15042,Q86VI3,Q86X10,Q8IZ81,Q8TC07,Q9BTW9,Q9HCU5,Q9UPQ3,Q9UKL3,P05386,Q9UER7,P61289,Q16186,Q13362,Q14738,Q06587,O75569,P35251,Q15022
4	GO:0010851	cyclase regulator activity	Molecular Function	1	Q14831
4	GO:0019207	kinase regulator activity	Molecular Function	5	P06748,O75367,P05386,Q9UER7,Q562E7
4	GO:0019208	phosphatase regulator activity	Molecular Function	6	P19525,P30153,P63151,Q13362,Q14738,Q8TF05
4	GO:0035033	histone deacetylase regulator activity	Molecular Function	1	P04637
4	GO:0043028	cysteine-type endopeptidase regulator activity involved in apoptotic process	Molecular Function	1	Q9UKL3
4	GO:0055106	ubiquitin-protein transferase regulator activity	Molecular Function	3	Q06587,P46777,P61927
4	GO:0060589	nucleoside-triphosphatase regulator activity	Molecular Function	18	O94887,Q13144,Q14155,Q15042,Q8TER5,Q92974,Q9HCU5,Q9Y6D5,A7KAX9,P49407,Q13459,Q86VI3,Q86X10,Q8IZ81,Q8TC07,Q9BTW9,Q9UPQ3,O95373
4	GO:0061134	peptidase regulator activity	Molecular Function	3	Q9UKL3,P61289,Q16186
4	GO:0000774	adenyl-nucleotide exchange factor activity	Molecular Function	1	O95817
4	GO:0001671	ATPase activator activity	Molecular Function	1	Q8IXB1
4	GO:0140416	transcription regulator inhibitor activity	Molecular Function	1	Q9UER7
4	GO:0005049	nuclear export signal receptor activity	Molecular Function	2	O14980,Q9UIA9
4	GO:0061608	nuclear import signal receptor activity	Molecular Function	5	O60518,P52292,Q96P70,Q9UI26,Q9Y5L0
4	GO:0032977	membrane insertase activity	Molecular Function	1	Q9NZJ7
4	GO:0140713	histone chaperone activity	Molecular Function	2	Q13610,Q96P70
4	GO:0000981	DNA-binding transcription factor activity, RNA polymerase II-specific	Molecular Function	20	P04637,P18847,P49711,Q32MZ4,Q8TF47,Q96K58,Q96QR8,Q9Y6Q3,P52952,Q6ZN55,Q99459,O15198,O95625,P42224,P51814,Q15776,Q3KP31,Q8TF39,Q8WY36,Q9Y2D9
4	GO:0001216	DNA-binding transcription activator activity	Molecular Function	6	P04637,P18847,P52952,Q6ZN55,Q96K58,Q99459
4	GO:0001217	DNA-binding transcription repressor activity	Molecular Function	8	P04637,P18847,P49711,Q32MZ4,Q8TF47,Q96K58,Q96QR8,Q9Y6Q3
4	GO:0003713	transcription coactivator activity	Molecular Function	11	Q15648,Q9NPJ6,O75475,P06748,P29590,P38398,P49407,P49848,Q01831,Q96EB6,Q9UER7
4	GO:0003714	transcription corepressor activity	Molecular Function	15	Q15648,Q15910,Q6IAN0,Q8TDD1,Q96EB6,Q96IZ0,Q96T58,Q9BQ70,Q9BQG0,Q9UDR5,Q9UER7,Q9UIV1,Q9UKL3,Q9UMX1,Q9Y3T9
4	GO:0140664	ATP-dependent DNA damage sensor activity	Molecular Function	1	P20585
4	GO:0140315	iron ion sequestering activity	Molecular Function	1	P02794
4	GO:0003678	DNA helicase activity	Molecular Function	2	Q96RR1,Q7L2E3
4	GO:0003724	RNA helicase activity	Molecular Function	13	Q9HCE1,Q9H6S0,Q6P158,Q7L2E3,Q8IY37,Q8NHQ9,Q8TDD1,Q96GQ7,Q9BQ39,Q9GZR7,Q9H0S4,Q9NR30,Q9NVP1
4	GO:0003689	DNA clamp loader activity	Molecular Function	1	P35251
4	GO:0003918	DNA topoisomerase type II (double strand cut, ATP-hydrolyzing) activity	Molecular Function	1	Q02880
4	GO:0061860	DNA clamp unloader activity	Molecular Function	2	P35251,Q96QE3
4	GO:0140658	ATP-dependent chromatin remodeler activity	Molecular Function	3	O60264,P28370,Q149N8
4	GO:0004467	long-chain fatty acid-CoA ligase activity	Molecular Function	1	O95573
4	GO:0031956	medium-chain fatty acid-CoA ligase activity	Molecular Function	1	O95573
4	GO:0019829	ATPase-coupled cation transmembrane transporter activity	Molecular Function	1	Q9UI12
4	GO:0042625	ATPase-coupled ion transmembrane transporter activity	Molecular Function	1	Q9UI12
4	GO:0140359	ABC-type transporter activity	Molecular Function	1	P28288
5	GO:0008137	NADH dehydrogenase (ubiquinone) activity	Molecular Function	1	Q16795
5	GO:0016616	oxidoreductase activity, acting on the CH-OH group of donors, NAD or NADP as acceptor	Molecular Function	1	Q6IAN0
5	GO:0016900	oxidoreductase activity, acting on the CH-OH group of donors, disulfide as acceptor	Molecular Function	1	Q9BQB6
5	GO:0016901	oxidoreductase activity, acting on the CH-OH group of donors, quinone or similar compound as acceptor	Molecular Function	1	P43304
5	GO:0003995	acyl-CoA dehydrogenase activity	Molecular Function	1	P11310
5	GO:0009918	sterol delta7 reductase activity	Molecular Function	1	Q9UBM7
5	GO:0016628	oxidoreductase activity, acting on the CH-CH group of donors, NAD or NADP as acceptor	Molecular Function	1	Q9UBM7
5	GO:0016646	oxidoreductase activity, acting on the CH-NH group of donors, NAD or NADP as acceptor	Molecular Function	2	P42898,Q9UDR5
5	GO:0003954	NADH dehydrogenase activity	Molecular Function	1	Q16795
5	GO:0016655	oxidoreductase activity, acting on NAD(P)H, quinone or similar compound as acceptor	Molecular Function	1	Q16795
5	GO:0016662	oxidoreductase activity, acting on other nitrogenous compounds as donors, cytochrome as acceptor	Molecular Function	1	P35520
5	GO:0098809	nitrite reductase activity	Molecular Function	1	P35520
5	GO:0015036	disulfide oxidoreductase activity	Molecular Function	1	Q8IXB1
5	GO:0016671	oxidoreductase activity, acting on a sulfur group of donors, disulfide as acceptor	Molecular Function	1	Q8IXB1
5	GO:0016706	2-oxoglutarate-dependent dioxygenase activity	Molecular Function	1	Q9NVH6
5	GO:0016724	oxidoreductase activity, acting on metal ions, oxygen as acceptor	Molecular Function	1	P02794
5	GO:0008168	methyltransferase activity	Molecular Function	17	Q9UNQ2,O60725,Q7Z2T5,Q7L2J0,Q99707,B2RD09,O43159,Q9H5U6,P46087,Q96P11,Q15910,Q9BVS5,Q6IN84,Q96GJ1,Q15022,O96028,Q9NQV6
5	GO:0016747	acyltransferase activity, transferring groups other than amino-acyl groups	Molecular Function	7	P50416,Q56NI9,Q9H0A0,O15498,P15104,Q96PB1,Q96EB6
5	GO:0008194	UDP-glycosyltransferase activity	Molecular Function	2	Q8NAT1,Q92839
5	GO:0016758	hexosyltransferase activity	Molecular Function	2	Q8NAT1,Q92839
5	GO:0008483	transaminase activity	Molecular Function	1	Q06210
5	GO:0016301	kinase activity	Molecular Function	21	O15111,P10398,P19525,P41743,P42345,P50613,P78527,Q13523,Q8TD08,Q96SB4,O14730,P11387,P27361,P78362,P78368,Q38SD2,Q8WZ42,Q9P0L2,P46020,Q07002,Q9Y4B6
5	GO:0016773	phosphotransferase activity, alcohol group as acceptor	Molecular Function	21	O15111,P10398,P19525,P41743,P42345,P50613,P78527,Q13523,Q8TD08,Q96SB4,O14730,P11387,P27361,P78362,P78368,Q38SD2,Q8WZ42,Q9P0L2,P46020,Q07002,Q9Y4B6
5	GO:0016779	nucleotidyltransferase activity	Molecular Function	12	Q9HAN9,O15160,Q9Y6K5,Q8NDF8,O00411,P52434,Q4G0F4,Q9H1D9,Q9H9Y6,Q9NW08,Q5TAX3,Q9BWH6
5	GO:0016783	sulfurtransferase activity	Molecular Function	1	Q16762
5	GO:0004842	ubiquitin-protein transferase activity	Molecular Function	20	Q9UMS4,O95376,Q06587,Q149N8,Q15648,Q2Q1W2,Q75N03,Q7Z569,Q96DX7,Q96JN8,Q9P253,Q9Y4X5,P62256,P38398,P61081,Q13617,Q5TA31,Q9UJX2,Q9UJX5,Q9Y4D8
5	GO:0019788	NEDD8 transferase activity	Molecular Function	1	P61081
5	GO:0019789	SUMO transferase activity	Molecular Function	1	P29590
5	GO:0061650	ubiquitin-like protein conjugating enzyme activity	Molecular Function	2	P62256,P61081
5	GO:0061659	ubiquitin-like protein ligase activity	Molecular Function	14	Q9UMS4,O95376,Q06587,Q149N8,Q15648,Q2Q1W2,Q75N03,Q7Z569,Q96DX7,Q96JN8,Q9P253,Q9Y4X5,O94874,P29590
5	GO:0071568	UFM1 transferase activity	Molecular Function	1	O94874
5	GO:0004175	endopeptidase activity	Molecular Function	5	Q93009,Q99797,P48147,Q4J6C6,Q8TCT9
5	GO:0008234	cysteine-type peptidase activity	Molecular Function	4	Q93009,O00507,Q96K76,Q96RU2
5	GO:0008236	serine-type peptidase activity	Molecular Function	2	P48147,Q4J6C6
5	GO:0008237	metallopeptidase activity	Molecular Function	2	Q99797,Q6UB28
5	GO:0008238	exopeptidase activity	Molecular Function	1	Q6UB28
5	GO:0019783	ubiquitin-like protein peptidase activity	Molecular Function	4	O00507,Q93009,Q96K76,Q96RU2
5	GO:0070001	aspartic-type peptidase activity	Molecular Function	1	Q8TCT9
5	GO:0004518	nuclease activity	Molecular Function	10	O00411,Q01780,Q06265,Q504Q3,Q9UIV1,Q96AY2,Q9H8Y5,O75817,O95707,Q9Y4F3
5	GO:0016298	lipase activity	Molecular Function	2	P19174,Q8IY17
5	GO:0016790	thiolester hydrolase activity	Molecular Function	1	P28288
5	GO:0042578	phosphoric ester hydrolase activity	Molecular Function	9	P19174,Q9BT40,P67775,Q14738,O00743,P30153,Q12923,Q9H857,Q8IXW5
5	GO:0052689	carboxylic ester hydrolase activity	Molecular Function	2	P49588,Q8IY17
5	GO:0004553	hydrolase activity, hydrolyzing O-glycosyl compounds	Molecular Function	1	O60502
5	GO:0016799	hydrolase activity, hydrolyzing N-glycosyl compounds	Molecular Function	1	Q6SZW1
5	GO:0016811	hydrolase activity, acting on carbon-nitrogen (but not peptide) bonds, in linear amides	Molecular Function	2	Q6IA69,Q96EB6
5	GO:0016812	hydrolase activity, acting on carbon-nitrogen (but not peptide) bonds, in cyclic amides	Molecular Function	1	Q9BPU6
5	GO:0016814	hydrolase activity, acting on carbon-nitrogen (but not peptide) bonds, in cyclic amidines	Molecular Function	1	Q9NRW3
5	GO:0016818	hydrolase activity, acting on acid anhydrides, in phosphorus-containing anhydrides	Molecular Function	51	A4D1E9,O60841,P01111,P04899,P07437,Q16181,Q9BZE4,Q9HCN4,Q9UPQ3,O43933,O60264,P11021,P11142,P17066,P17987,P28288,P35250,P35251,P38646,P40227,P49368,P49736,P50990,P50991,P78371,Q13459,Q14807,Q6P158,Q7L2E3,Q8IY37,Q8IYT4,Q8NB90,Q8NBU5,Q8NE71,Q8NHQ9,Q8NI77,Q8TDD1,Q96GQ7,Q96Q89,Q96QE3,Q96RR1,Q99832,Q9BQ39,Q9GZR7,Q9H0S4,Q9H6S0,Q9HCE1,Q9NR30,Q9NTK5,Q9NVP1,Q9NYC9
5	GO:0004126	cytidine deaminase activity	Molecular Function	1	Q9NRW3
5	GO:0047844	deoxycytidine deaminase activity	Molecular Function	1	Q9NRW3
5	GO:0016836	hydro-lyase activity	Molecular Function	1	P35520
5	GO:0003917	DNA topoisomerase type I (single strand cut, ATP-independent) activity	Molecular Function	1	P11387
5	GO:0009982	pseudouridine synthase activity	Molecular Function	1	Q8N0Z8
5	GO:0004512	inositol-3-phosphate synthase activity	Molecular Function	1	Q9NPH2
5	GO:0004812	aminoacyl-tRNA ligase activity	Molecular Function	2	P49588,Q9Y2Z4
5	GO:0016405	CoA-ligase activity	Molecular Function	1	O95573
5	GO:0016878	acid-thiol ligase activity	Molecular Function	1	O95573
5	GO:0016880	acid-ammonia (or amide) ligase activity	Molecular Function	1	P15104
5	GO:0016884	carbon-nitrogen ligase activity, with glutamine as amido-N-donor	Molecular Function	3	Q6IA69,P08243,O15067
5	GO:0016421	CoA carboxylase activity	Molecular Function	1	Q9HCC0
5	GO:0003909	DNA ligase activity	Molecular Function	1	P49917
5	GO:0004674	protein serine/threonine kinase activity	Molecular Function	21	P78527,P46020,P50613,Q07002,P19525,P41743,P27361,Q8TD08,P10398,O15111,Q9Y4B6,O14730,P11387,P42345,P78362,P78368,Q13523,Q38SD2,Q8WZ42,Q96SB4,Q9P0L2
5	GO:0004712	protein serine/threonine/tyrosine kinase activity	Molecular Function	1	P27361
5	GO:0004713	protein tyrosine kinase activity	Molecular Function	2	P19525,Q8WZ42
5	GO:0010857	calcium-dependent protein kinase activity	Molecular Function	1	P41743
5	GO:0035173	histone kinase activity	Molecular Function	1	Q9Y4B6
5	GO:0050321	tau-protein kinase activity	Molecular Function	1	Q9P0L2
5	GO:0097472	cyclin-dependent protein kinase activity	Molecular Function	2	P50613,Q07002
5	GO:0106310	protein serine kinase activity	Molecular Function	18	O14730,P10398,P19525,P27361,P41743,P42345,P50613,P78362,P78368,P78527,Q07002,Q13523,Q38SD2,Q8TD08,Q8WZ42,Q96SB4,Q9P0L2,Q9Y4B6
5	GO:0004722	protein serine/threonine phosphatase activity	Molecular Function	4	Q8IXW5,O00743,P67775,P30153
5	GO:0004725	protein tyrosine phosphatase activity	Molecular Function	2	P67775,Q12923
5	GO:0016279	protein-lysine N-methyltransferase activity	Molecular Function	2	O96028,Q15910
5	GO:0042054	histone methyltransferase activity	Molecular Function	3	O96028,Q15910,Q15022
5	GO:0051998	protein carboxyl O-methyltransferase activity	Molecular Function	1	O60725
5	GO:0004839	ubiquitin activating enzyme activity	Molecular Function	1	Q13564
5	GO:0019781	NEDD8 activating enzyme activity	Molecular Function	1	Q13564
5	GO:0019706	protein-cysteine S-palmitoyltransferase activity	Molecular Function	2	O15498,P15104
5	GO:0004407	histone deacetylase activity	Molecular Function	1	Q96EB6
5	GO:0034979	NAD-dependent protein deacetylase activity	Molecular Function	1	Q96EB6
5	GO:0034061	DNA polymerase activity	Molecular Function	1	Q8NDF8
5	GO:0004540	ribonuclease activity	Molecular Function	9	O00411,Q01780,Q06265,Q504Q3,Q9UIV1,Q9H8Y5,O75817,O95707,Q9Y4F3
5	GO:0008173	RNA methyltransferase activity	Molecular Function	9	Q9UNQ2,Q7Z2T5,Q9H5U6,P46087,Q96P11,Q9BVS5,Q6IN84,Q96GJ1,Q7L2J0
5	GO:0050265	RNA uridylyltransferase activity	Molecular Function	1	Q5TAX3
5	GO:0097747	RNA polymerase activity	Molecular Function	7	O15160,O00411,P52434,Q4G0F4,Q9H1D9,Q9H9Y6,Q9NW08
5	GO:0140101	catalytic activity, acting on a tRNA	Molecular Function	8	P49588,O75817,O95707,Q7Z2T5,Q9Y2Z4,Q9BVS5,Q96GJ1,Q9H8Y5
5	GO:0140102	catalytic activity, acting on a rRNA	Molecular Function	7	Q9UNQ2,Q9H5U6,P46087,Q96P11,Q9BVS5,Q6IN84,Q96GJ1
5	GO:0017128	phospholipid scramblase activity	Molecular Function	1	Q7Z3C6
5	GO:0005343	organic acid:sodium symporter activity	Molecular Function	1	Q9H2H9
5	GO:0046943	carboxylic acid transmembrane transporter activity	Molecular Function	5	P30825,Q9H2H9,Q9UJS0,Q15758,Q9BWM7
5	GO:0005216	ion channel activity	Molecular Function	1	P39086
5	GO:0008324	cation transmembrane transporter activity	Molecular Function	7	P30825,Q9H2H9,Q6P4Q7,Q15758,P39086,Q9BWM7,Q9UI12
5	GO:0008509	anion transmembrane transporter activity	Molecular Function	5	P30825,Q9UJS0,Q15758,Q9H2H9,Q9BWM7
5	GO:0022853	active ion transmembrane transporter activity	Molecular Function	2	Q9H2H9,Q9UI12
5	GO:0022890	inorganic cation transmembrane transporter activity	Molecular Function	4	Q9H2H9,Q6P4Q7,P39086,Q9UI12
5	GO:0015267	channel activity	Molecular Function	2	P39086,Q15758
5	GO:0015291	secondary active transmembrane transporter activity	Molecular Function	2	Q9H2H9,Q15758
5	GO:0015399	primary active transmembrane transporter activity	Molecular Function	3	Q16795,P28288,Q9UI12
5	GO:0005290	L-histidine transmembrane transporter activity	Molecular Function	1	P30825
5	GO:0031492	nucleosomal DNA binding	Molecular Function	4	O75367,P07305,P16403,Q92522
5	GO:0043035	chromatin insulator sequence binding	Molecular Function	1	P49711
5	GO:0019905	syntaxin binding	Molecular Function	2	Q08379,Q9P253
5	GO:0001099	basal RNA polymerase II transcription machinery binding	Molecular Function	2	P20226,P04637
5	GO:0001664	G protein-coupled receptor binding	Molecular Function	5	P49407,P42224,Q9Y5X3,P04899,P11142
5	GO:0005126	cytokine receptor binding	Molecular Function	6	Q9UKL3,P42224,Q9BUZ4,Q9NXR7,P19174,Q9UNH7
5	GO:0005159	insulin-like growth factor receptor binding	Molecular Function	1	P49407
5	GO:0005176	ErbB-2 class receptor binding	Molecular Function	1	Q96RT1
5	GO:0017162	aryl hydrocarbon receptor binding	Molecular Function	2	P20226,P49848
5	GO:0030971	receptor tyrosine kinase binding	Molecular Function	2	P04637,P19174
5	GO:0035254	glutamate receptor binding	Molecular Function	1	P19174
5	GO:0042287	MHC protein binding	Molecular Function	1	P07437
5	GO:0042975	peroxisome proliferator activated receptor binding	Molecular Function	1	Q15648
5	GO:0048495	Roundabout binding	Molecular Function	1	Q13459
5	GO:0050811	GABA receptor binding	Molecular Function	2	P67775,Q9Y6D5
5	GO:0070851	growth factor receptor binding	Molecular Function	2	O60749,Q13596
5	GO:1990459	transferrin receptor binding	Molecular Function	3	O15111,O60749,Q13596
5	GO:1990460	leptin receptor binding	Molecular Function	2	O60749,Q13596
5	GO:0003779	actin binding	Molecular Function	21	O00160,Q13459,Q66K74,Q86VI3,Q8WZ42,Q9Y613,A0A0A0MRA8,A0A590UJG2,D3DPU2,P11171,P40123,P57737,P78559,Q01518,Q13643,Q5T1M5,Q8NI77,Q92558,Q96IZ0,Q9NQA3,Q9P253
5	GO:0015631	tubulin binding	Molecular Function	24	A0A590UJG2,A0A6Q8PFA6,P49754,P78559,Q08379,Q14807,Q66K74,Q7Z4H7,Q8IYT4,Q8NI77,Q92974,Q96BD8,Q96Q89,Q96SI9,Q9BT25,Q9BXS6,Q9GZM8,Q9NYZ3,Q15813,Q9NQA3,Q14155,P42858,Q9BTW9,P38398
5	GO:0017022	myosin binding	Molecular Function	2	Q86VI3,Q9Y6D5
5	GO:0019894	kinesin binding	Molecular Function	2	O43747,Q92845
5	GO:0031433	telethonin binding	Molecular Function	1	Q8WZ42
5	GO:0034452	dynactin binding	Molecular Function	3	P42858,Q9UNH7,Q9Y5X3
5	GO:0042805	actinin binding	Molecular Function	2	Q8WZ42,Q96QZ7
5	GO:0048156	tau protein binding	Molecular Function	3	P67775,P78559,Q9P0L2
5	GO:0001221	transcription coregulator binding	Molecular Function	7	P42224,Q15022,Q15370,Q15910,Q9Y483,Q15648,P49711
5	GO:0140296	general transcription initiation factor binding	Molecular Function	5	P20226,P04637,P42345,Q53T94,Q15648
5	GO:0140297	DNA-binding transcription factor binding	Molecular Function	28	P42224,Q15648,Q96EB6,Q9UIF9,P20226,P49848,Q8TDD1,Q9Y4B6,P06748,Q9NPJ6,Q86XI2,P32780,Q9UER7,O94888,P04637,P28370,P52952,P78527,Q01831,Q06265,Q96T58,O60216,O75475,P27361,Q6IAN0,Q96QR8,Q9UIV1,Q9Y3T9
5	GO:0017134	fibroblast growth factor binding	Molecular Function	1	P15880
5	GO:0002020	protease binding	Molecular Function	7	O14730,P46379,Q15020,P04637,Q16186,Q8WZ42,Q96RR1
5	GO:0008179	adenylate cyclase binding	Molecular Function	3	P40123,Q01518,Q02952
5	GO:0019900	kinase binding	Molecular Function	20	O75367,O94874,O95573,P06748,P19174,P50851,P62753,P68366,Q08379,Q14155,Q8WZ42,Q9BUZ4,Q9UER7,Q9UMX1,Q9Y4P3,P04637,Q14596,Q96EB6,P42858,Q9NYB9
5	GO:0019902	phosphatase binding	Molecular Function	9	P62258,Q92845,Q9UJX3,Q9UJX4,Q9UJX5,P04637,P42224,A8K8P3,P27361
5	GO:0031996	thioesterase binding	Molecular Function	1	Q9BUZ4
5	GO:0035035	histone acetyltransferase binding	Molecular Function	2	P42224,Q15648
5	GO:0035473	lipase binding	Molecular Function	1	Q96CS3
5	GO:0042826	histone deacetylase binding	Molecular Function	4	P04637,P52292,P62258,Q09028
5	GO:0044389	ubiquitin-like protein ligase binding	Molecular Function	29	A8K9U1,O94888,P04637,P07437,P11021,P11142,P17066,P17987,P29590,P35520,P38398,P38646,P46379,P46777,P49407,P62258,P78371,Q13564,Q13617,Q149N8,Q15370,Q15843,Q8TCT9,Q96CS3,Q9BUZ4,Q9NYB9,Q9UER7,Q9Y4X5,P42224
5	GO:0044390	ubiquitin-like protein conjugating enzyme binding	Molecular Function	3	O95376,Q9UBW7,Q9Y4X5
5	GO:0044547	DNA topoisomerase binding	Molecular Function	1	P19338
5	GO:0051020	GTPase binding	Molecular Function	17	O14980,O15397,O43592,O43747,O95373,Q13459,Q15042,Q86VI3,Q92974,Q96F07,Q96P70,Q9UI26,Q9UIA9,Q9Y5L0,P67809,Q6IAA8,Q9HCU5
5	GO:0051117	ATPase binding	Molecular Function	2	Q8IXB1,Q96PN6
5	GO:0070063	RNA polymerase binding	Molecular Function	4	Q8IXW5,P38398,Q92688,Q9H6S0
5	GO:0070182	DNA polymerase binding	Molecular Function	2	Q9BXW9,Q9H0A0
5	GO:0017124	SH3 domain binding	Molecular Function	2	Q8TD08,Q9NYB9
5	GO:0030165	PDZ domain binding	Molecular Function	1	Q14831
5	GO:0030275	LRR domain binding	Molecular Function	1	Q96IZ0
5	GO:0042731	PH domain binding	Molecular Function	2	P19338,Q92610
5	GO:0043398	HLH domain binding	Molecular Function	1	Q96EB6
5	GO:0050693	LBD domain binding	Molecular Function	1	Q15648
5	GO:0050699	WW domain binding	Molecular Function	2	Q96Q89,Q9BUZ4
5	GO:0055131	C3HC4-type RING finger domain binding	Molecular Function	1	P11142
5	GO:0071987	WD40-repeat domain binding	Molecular Function	4	P40227,Q16531,Q96K76,Q99459
5	GO:0097718	disordered domain specific binding	Molecular Function	1	P04637
5	GO:0035615	clathrin adaptor activity	Molecular Function	1	O43747
5	GO:0030544	Hsp70 protein binding	Molecular Function	3	P46379,Q8IXB1,Q9NXW2
5	GO:0032183	SUMO binding	Molecular Function	2	Q9UKL3,P29590
5	GO:0043130	ubiquitin binding	Molecular Function	3	O94888,Q14596,Q96CS3
5	GO:0035064	methylated histone binding	Molecular Function	5	Q13610,O43159,Q15022,Q86XI2,Q9Y483
5	GO:0070577	lysine-acetylated histone binding	Molecular Function	2	Q96EB6,Q9UIF9
5	GO:0042803	protein homodimerization activity	Molecular Function	18	O15111,O60749,O75569,P06748,P18847,P28288,P29590,P35520,P42224,P52952,Q13596,Q32MZ4,Q8TCT9,Q96Q89,Q9UER7,Q9UL63,Q9UNH7,Q9Y2Z4
5	GO:0036312	phosphatidylinositol 3-kinase regulatory subunit binding	Molecular Function	1	Q12923
5	GO:0070410	co-SMAD binding	Molecular Function	1	O00507
5	GO:0070411	I-SMAD binding	Molecular Function	1	O15198
5	GO:0046982	protein heterodimerization activity	Molecular Function	14	O15111,O60749,O75367,P04637,P18847,P29590,P30153,P49848,P62258,P67775,Q13428,Q13564,Q13596,Q86X10
5	GO:0045296	cadherin binding	Molecular Function	25	O15498,O60749,O95817,P11021,P11142,P15880,P42224,P47914,P49207,P50914,P50990,P62258,P62424,P62750,P83731,Q02878,Q08379,Q13596,Q16181,Q32MZ4,Q7Z2W4,Q92522,Q99961,Q9NTK5,Q9Y5X3
5	GO:0098631	cell adhesion mediator activity	Molecular Function	1	Q08722
5	GO:0034237	protein kinase A regulatory subunit binding	Molecular Function	2	Q92558,Q9Y6D5
5	GO:0045309	protein phosphorylated amino acid binding	Molecular Function	2	P27361,P62258
5	GO:0031593	polyubiquitin modification-dependent protein binding	Molecular Function	3	Q562E7,P46379,Q9NXR7
5	GO:0140033	acetylation-dependent protein binding	Molecular Function	2	Q96EB6,Q9UIF9
5	GO:0140034	methylation-dependent protein binding	Molecular Function	5	O43159,Q15022,Q86XI2,Q9Y483,Q13610
5	GO:0140035	ubiquitination-like modification-dependent protein binding	Molecular Function	3	O43933,P29590,Q9UER7
5	GO:0160002	ADP-D-ribose modification-dependent protein binding	Molecular Function	1	O75367
5	GO:0035091	phosphatidylinositol binding	Molecular Function	8	P11171,Q9P0L2,Q9Y5X3,Q96L92,A7KAX9,O60749,Q13596,Q9UNH7
5	GO:0070300	phosphatidic acid binding	Molecular Function	1	Q9P0L2
5	GO:0005537	mannose binding	Molecular Function	1	Q9H2X3
5	GO:0005048	signal sequence binding	Molecular Function	5	Q9NXR7,O60518,P52292,Q7Z569,P37108
5	GO:0016018	cyclosporin A binding	Molecular Function	1	Q13427
5	GO:0017076	purine nucleotide binding	Molecular Function	99	O95817,A0A6Q8PFA6,O00160,O14730,O15067,O15111,O43933,O60264,O95573,P08243,P10398,P11021,P11142,P11387,P15104,P17066,P17987,P19525,P20585,P27361,P28288,P28370,P35250,P35251,P38646,P40227,P41743,P42345,P49368,P49588,P49736,P49917,P50613,P50990,P50991,P61081,P62256,P78362,P78368,P78371,P78527,Q02880,Q07002,Q13459,Q13523,Q14807,Q149N8,Q38SD2,Q6IA69,Q6P158,Q7L2E3,Q8IY37,Q8IYT4,Q8NB90,Q8NBU5,Q8NE71,Q8N…
5	GO:0050660	flavin adenine dinucleotide binding	Molecular Function	2	P42898,P11310
5	GO:0050661	NADP binding	Molecular Function	2	P42898,Q9UBM7
5	GO:0051287	NAD binding	Molecular Function	1	Q96EB6
5	GO:0032549	ribonucleoside binding	Molecular Function	2	Q9H9Y6,Q9NW08
5	GO:0031419	cobalamin binding	Molecular Function	1	Q99707
5	GO:0016597	amino acid binding	Molecular Function	3	Q14831,Q9Y2Z4,P49588
5	GO:0005546	phosphatidylinositol-4,5-bisphosphate binding	Molecular Function	1	Q9P0L2
5	GO:0016208	AMP binding	Molecular Function	1	Q9UL16
5	GO:0019003	GDP binding	Molecular Function	1	P01111
5	GO:0030170	pyridoxal phosphate binding	Molecular Function	1	P35520
5	GO:0031406	carboxylic acid binding	Molecular Function	1	Q14831
5	GO:0035639	purine ribonucleoside triphosphate binding	Molecular Function	97	A0A6Q8PFA6,O00160,O14730,O15067,O15111,O43933,O60264,O95573,P08243,P10398,P11021,P11142,P11387,P15104,P17066,P17987,P19525,P20585,P27361,P28288,P28370,P35250,P35251,P38646,P40227,P41743,P42345,P49368,P49588,P49736,P49917,P50613,P50990,P50991,P61081,P62256,P78362,P78368,P78371,P78527,Q02880,Q07002,Q13459,Q13523,Q14807,Q149N8,Q38SD2,Q6IA69,Q6P158,Q7L2E3,Q8IY37,Q8IYT4,Q8NB90,Q8NBU5,Q8NE71,Q8NHQ9,Q8N…
5	GO:0043531	ADP binding	Molecular Function	1	Q13459
5	GO:0070403	NAD+ binding	Molecular Function	1	Q96EB6
5	GO:0071890	bicarbonate binding	Molecular Function	1	Q96PN6
5	GO:0080025	phosphatidylinositol-3,5-bisphosphate binding	Molecular Function	1	Q9Y5X3
5	GO:0046872	metal ion binding	Molecular Function	115	A4D1E9,P78362,Q96PN6,Q96SB4,Q9P0L2,P02792,P02794,Q9NVH6,P04637,A0A590UJG2,P11021,P19174,P27824,P43304,P62760,Q14831,Q8WZ42,Q9UJS0,A7E2V4,O60941,O95376,P29590,P38398,P49588,P49711,Q14596,Q2Q1W2,Q5F1R6,Q5TAX3,Q6ZN17,Q7Z569,Q8IXK0,Q92974,Q96DX7,Q99707,Q9BUZ4,Q9H5U6,Q9NP64,Q9NRW3,Q9UBW7,Q9Y4X5,Q9Y6Q3,O00743,O14730,O15067,O15198,O43422,O60841,O95625,O96028,P04899,P07437,P10398,P15104,P35520,P41743,P49…
5	GO:0070905	serine binding	Molecular Function	1	Q14831
5	GO:1990254	keratin filament binding	Molecular Function	1	Q96EB6
5	GO:0023026	MHC class II protein complex binding	Molecular Function	2	P11142,P62258
5	GO:0005047	signal recognition particle binding	Molecular Function	1	P49458
5	GO:0043022	ribosome binding	Molecular Function	6	Q92552,P11021,P42345,P46379,Q8NE71,Q8WWC4
5	GO:0043023	ribosomal large subunit binding	Molecular Function	3	O60524,P06748,Q9NTK5
5	GO:0043024	ribosomal small subunit binding	Molecular Function	2	P06748,Q96EY7
5	GO:1990275	preribosome binding	Molecular Function	2	Q8NB90,Q9BZE4
5	GO:0001067	transcription regulatory region nucleic acid binding	Molecular Function	35	O75367,P04637,P18847,P20226,P38398,P49711,P52952,P42224,Q3KP31,Q8TF47,Q8WY36,Q96QR8,Q99459,Q9Y483,Q9Y6Q3,O15198,O95625,P11387,P51814,Q09028,Q15022,Q15648,Q15776,Q15910,Q32MZ4,Q6ZN55,Q8TF39,Q96EB6,Q96K58,P42345,O00411,P06748,P17480,Q53T94,Q9BQG0
5	GO:0003677	DNA binding	Molecular Function	102	O75367,Q01831,P04637,P18847,P20226,P38398,P49711,P52952,P42224,Q3KP31,Q8TF47,Q8WY36,Q96QR8,Q99459,Q9Y483,Q9Y6Q3,O15198,O95625,P11387,P51814,Q09028,Q15022,Q15648,Q15776,Q15910,Q32MZ4,Q6ZN55,Q8TF39,Q96EB6,Q96K58,P42345,O00411,P06748,P17480,Q53T94,P07305,Q16531,O75419,P49736,Q9BQ67,P16403,P20585,P35251,P67809,P78527,Q13325,Q92522,Q99551,Q9H1D9,P52434,Q96RR1,P28370,P19338,O96028,Q9BQG0,O75475,Q6ZN17,…
5	GO:0003723	RNA binding	Molecular Function	198	O43592,O60524,O60841,P05455,P18077,P49588,Q13325,Q7Z2T5,Q92552,Q9H0A0,Q9Y2Z4,Q7L2E3,O75569,P19525,Q32MZ4,Q96SI9,Q9NR30,Q9Y6K5,Q01780,O75153,P15880,P18124,P40429,P42766,P83731,Q4G0J3,Q6ZN17,Q8N5C6,Q8WVV9,Q96QR8,Q96T58,Q9NZI8,O00425,P04637,P46777,Q9BRU9,Q16762,Q9H0U6,P09132,P37108,P49458,Q7L2J0,Q15020,P06748,P46781,P61927,P62280,P62750,P62917,Q96EY7,Q9H583,O75817,O95707,P78527,Q8IY37,P67809,Q2Q1W2,…
5	GO:0140666	annealing activity	Molecular Function	2	P04637,P28370
5	GO:0020037	heme binding	Molecular Function	1	P35520
5	GO:0032555	purine ribonucleotide binding	Molecular Function	98	A0A6Q8PFA6,O00160,O14730,O15067,O15111,O43933,O60264,O95573,P08243,P10398,P11021,P11142,P11387,P15104,P17066,P17987,P19525,P20585,P27361,P28288,P28370,P35250,P35251,P38646,P40227,P41743,P42345,P49368,P49588,P49736,P49917,P50613,P50990,P50991,P61081,P62256,P78362,P78368,P78371,P78527,Q02880,Q07002,Q13459,Q13523,Q14807,Q149N8,Q38SD2,Q6IA69,Q6P158,Q7L2E3,Q8IY37,Q8IYT4,Q8NB90,Q8NBU5,Q8NE71,Q8NHQ9,Q8N…
5	GO:0003743	translation initiation factor activity	Molecular Function	3	O60841,Q13144,Q14232
5	GO:0008528	G protein-coupled peptide receptor activity	Molecular Function	2	Q9NQS5,Q9BT40
5	GO:0004930	G protein-coupled receptor activity	Molecular Function	4	Q9NQS5,Q14831,Q9BT40,Q8NGH5
5	GO:0004984	olfactory receptor activity	Molecular Function	1	Q8NGH5
5	GO:0008066	glutamate receptor activity	Molecular Function	2	Q14831,P39086
5	GO:0030369	ICAM-3 receptor activity	Molecular Function	1	Q9H2X3
5	GO:0042813	Wnt-activated receptor activity	Molecular Function	1	B7ZLD0
5	GO:0071936	coreceptor activity involved in Wnt signaling pathway	Molecular Function	1	B7ZLD0
5	GO:0022835	transmitter-gated channel activity	Molecular Function	1	P39086
5	GO:0098960	postsynaptic neurotransmitter receptor activity	Molecular Function	1	P39086
5	GO:0140768	protein ADP-ribosyltransferase-substrate adaptor activity	Molecular Function	1	Q9HAN9
5	GO:1990756	ubiquitin ligase-substrate adaptor activity	Molecular Function	2	A7E2V4,Q9Y4B6
5	GO:0008200	ion channel inhibitor activity	Molecular Function	1	Q9UKS6
5	GO:0005246	calcium channel regulator activity	Molecular Function	2	Q9UKS6,P62258
5	GO:0015459	potassium channel regulator activity	Molecular Function	1	P62258
5	GO:0010852	cyclase inhibitor activity	Molecular Function	1	Q14831
5	GO:0019210	kinase inhibitor activity	Molecular Function	2	P06748,O75367
5	GO:0055102	lipase inhibitor activity	Molecular Function	1	Q96CS3
5	GO:0055105	ubiquitin-protein transferase inhibitor activity	Molecular Function	2	P46777,P61927
5	GO:0005096	GTPase activator activity	Molecular Function	11	A7KAX9,P49407,Q13459,Q15042,Q86VI3,Q86X10,Q8IZ81,Q8TC07,Q9BTW9,Q9HCU5,Q9UPQ3
5	GO:0016504	peptidase activator activity	Molecular Function	3	Q9UKL3,P61289,Q16186
5	GO:0019209	kinase activator activity	Molecular Function	2	P05386,Q9UER7
5	GO:0019211	phosphatase activator activity	Molecular Function	2	Q13362,Q14738
5	GO:0097027	ubiquitin-protein transferase activator activity	Molecular Function	1	Q06587
5	GO:0019887	protein kinase regulator activity	Molecular Function	4	P06748,O75367,P05386,Q9UER7
5	GO:0035014	phosphatidylinositol 3-kinase regulator activity	Molecular Function	1	Q562E7
5	GO:0019888	protein phosphatase regulator activity	Molecular Function	6	Q13362,Q14738,P19525,P30153,P63151,Q8TF05
5	GO:0008656	cysteine-type endopeptidase activator activity involved in apoptotic process	Molecular Function	1	Q9UKL3
5	GO:0030695	GTPase regulator activity	Molecular Function	18	O94887,Q13144,Q14155,Q15042,Q8TER5,Q92974,Q9HCU5,Q9Y6D5,A7KAX9,P49407,Q13459,Q86VI3,Q86X10,Q8IZ81,Q8TC07,Q9BTW9,Q9UPQ3,O95373
5	GO:0061135	endopeptidase regulator activity	Molecular Function	2	P61289,Q16186
5	GO:0001227	DNA-binding transcription repressor activity, RNA polymerase II-specific	Molecular Function	8	P04637,P18847,P49711,Q32MZ4,Q8TF47,Q96K58,Q96QR8,Q9Y6Q3
5	GO:0001228	DNA-binding transcription activator activity, RNA polymerase II-specific	Molecular Function	6	P04637,P18847,P52952,Q6ZN55,Q96K58,Q99459
5	GO:0030374	nuclear receptor coactivator activity	Molecular Function	2	Q15648,Q9NPJ6
5	GO:0043139	5'-3' DNA helicase activity	Molecular Function	1	Q96RR1
5	GO:0032574	5'-3' RNA helicase activity	Molecular Function	1	Q9HCE1
5	GO:0034458	3'-5' RNA helicase activity	Molecular Function	1	Q9H6S0
5	GO:0140751	histone octamer slider activity	Molecular Function	1	O60264
5	GO:0047676	arachidonate-CoA ligase activity	Molecular Function	1	O95573
5	GO:0090433	palmitoyl-CoA ligase activity	Molecular Function	1	O95573
5	GO:0046961	proton-transporting ATPase activity, rotational mechanism	Molecular Function	1	Q9UI12
5	GO:0044769	ATPase activity, coupled to transmembrane movement of ions, rotational mechanism	Molecular Function	1	Q9UI12
6	GO:0000140	acylglycerone-phosphate reductase activity	Molecular Function	1	Q6IAN0
6	GO:0047057	vitamin-K-epoxide reductase (warfarin-sensitive) activity	Molecular Function	1	Q9BQB6
6	GO:0047058	vitamin-K-epoxide reductase (warfarin-insensitive) activity	Molecular Function	1	Q9BQB6
6	GO:0004368	glycerol-3-phosphate dehydrogenase (quinone) activity	Molecular Function	1	P43304
6	GO:0070991	medium-chain-acyl-CoA dehydrogenase activity	Molecular Function	1	P11310
6	GO:0047598	7-dehydrocholesterol reductase activity	Molecular Function	1	Q9UBM7
6	GO:0004489	methylenetetrahydrofolate reductase (NAD(P)H) activity	Molecular Function	1	P42898
6	GO:0004753	saccharopine dehydrogenase activity	Molecular Function	1	Q9UDR5
6	GO:0050136	NADH dehydrogenase (quinone) activity	Molecular Function	1	Q16795
6	GO:0003955	NAD(P)H dehydrogenase (quinone) activity	Molecular Function	1	Q16795
6	GO:0050421	nitrite reductase (NO-forming) activity	Molecular Function	1	P35520
6	GO:0050353	trimethyllysine dioxygenase activity	Molecular Function	1	Q9NVH6
6	GO:0004322	ferroxidase activity	Molecular Function	1	P02794
6	GO:0008169	C-methyltransferase activity	Molecular Function	3	P46087,Q96P11,Q96GJ1
6	GO:0008170	N-methyltransferase activity	Molecular Function	5	Q9UNQ2,Q7Z2T5,Q9H5U6,Q15910,O96028
6	GO:0008171	O-methyltransferase activity	Molecular Function	3	O60725,Q6IN84,Q7L2J0
6	GO:0008172	S-methyltransferase activity	Molecular Function	1	Q99707
6	GO:0008757	S-adenosylmethionine-dependent methyltransferase activity	Molecular Function	14	Q9UNQ2,O60725,Q7Z2T5,Q9H5U6,P46087,Q96P11,Q15910,Q9BVS5,Q6IN84,Q96GJ1,O96028,Q7L2J0,B2RD09,O43159
6	GO:0042084	5-methyltetrahydrofolate-dependent methyltransferase activity	Molecular Function	1	Q99707
6	GO:0008374	O-acyltransferase activity	Molecular Function	2	P50416,Q96PB1
6	GO:0016407	acetyltransferase activity	Molecular Function	3	Q56NI9,Q9H0A0,Q96PB1
6	GO:0016409	palmitoyltransferase activity	Molecular Function	3	P50416,O15498,P15104
6	GO:0016410	N-acyltransferase activity	Molecular Function	3	Q56NI9,Q9H0A0,Q96EB6
6	GO:0016417	S-acyltransferase activity	Molecular Function	2	O15498,P15104
6	GO:0160011	NAD-dependent protein decrotonylase activity	Molecular Function	1	Q96EB6
6	GO:1990698	palmitoleoyltransferase activity	Molecular Function	1	P50416
6	GO:0008375	acetylglucosaminyltransferase activity	Molecular Function	1	Q8NAT1
6	GO:0050501	hyaluronan synthase activity	Molecular Function	1	Q92839
6	GO:0070548	L-glutamine aminotransferase activity	Molecular Function	1	Q06210
6	GO:0070566	adenylyltransferase activity	Molecular Function	3	Q9HAN9,Q9Y6K5,Q8NDF8
6	GO:0070568	guanylyltransferase activity	Molecular Function	1	Q8NDF8
6	GO:0070569	uridylyltransferase activity	Molecular Function	1	Q5TAX3
6	GO:0004792	thiosulfate sulfurtransferase activity	Molecular Function	1	Q16762
6	GO:0061630	ubiquitin protein ligase activity	Molecular Function	12	Q9UMS4,O95376,Q06587,Q149N8,Q15648,Q2Q1W2,Q75N03,Q7Z569,Q96DX7,Q96JN8,Q9P253,Q9Y4X5
6	GO:0061631	ubiquitin conjugating enzyme activity	Molecular Function	1	P62256
6	GO:0061654	NEDD8 conjugating enzyme activity	Molecular Function	1	P61081
6	GO:0061666	UFM1 ligase activity	Molecular Function	1	O94874
6	GO:0004190	aspartic-type endopeptidase activity	Molecular Function	1	Q8TCT9
6	GO:0004197	cysteine-type endopeptidase activity	Molecular Function	1	Q93009
6	GO:0004222	metalloendopeptidase activity	Molecular Function	1	Q99797
6	GO:0004252	serine-type endopeptidase activity	Molecular Function	2	P48147,Q4J6C6
6	GO:0070012	oligopeptidase activity	Molecular Function	1	P48147
6	GO:0004843	cysteine-type deubiquitinase activity	Molecular Function	4	O00507,Q93009,Q96K76,Q96RU2
6	GO:0008235	metalloexopeptidase activity	Molecular Function	1	Q6UB28
6	GO:0004177	aminopeptidase activity	Molecular Function	1	Q6UB28
6	GO:0101005	deubiquitinase activity	Molecular Function	4	O00507,Q93009,Q96K76,Q96RU2
6	GO:0004519	endonuclease activity	Molecular Function	4	Q9H8Y5,O75817,O95707,Q96AY2
6	GO:0004527	exonuclease activity	Molecular Function	5	O00411,Q01780,Q06265,Q504Q3,Q9UIV1
6	GO:0004620	phospholipase activity	Molecular Function	2	P19174,Q8IY17
6	GO:0016289	CoA hydrolase activity	Molecular Function	1	P28288
6	GO:0008081	phosphoric diester hydrolase activity	Molecular Function	1	P19174
6	GO:0016791	phosphatase activity	Molecular Function	8	Q9BT40,P67775,Q14738,O00743,P30153,Q12923,Q9H857,Q8IXW5
6	GO:0002161	aminoacyl-tRNA editing activity	Molecular Function	1	P49588
6	GO:0004622	lysophospholipase activity	Molecular Function	1	Q8IY17
6	GO:0102545	phosphatidyl phospholipase B activity	Molecular Function	1	Q8IY17
6	GO:0015929	hexosaminidase activity	Molecular Function	1	O60502
6	GO:0102166	[protein]-3-O-(N-acetyl-D-glucosaminyl)-L-threonine O-N-acetyl-alpha-D-glucosaminase activity	Molecular Function	1	O60502
6	GO:0102167	[protein]-3-O-(N-acetyl-D-glucosaminyl)-L-serine O-N-acetyl-alpha-D-glucosaminase activity	Molecular Function	1	O60502
6	GO:0102571	[protein]-3-O-(N-acetyl-D-glucosaminyl)-L-serine/L-threonine O-N-acetyl-alpha-D-glucosaminase activity	Molecular Function	1	O60502
6	GO:0003953	NAD+ nucleosidase activity	Molecular Function	1	Q6SZW1
6	GO:0050135	NAD(P)+ nucleosidase activity	Molecular Function	1	Q6SZW1
6	GO:0004359	glutaminase activity	Molecular Function	1	Q6IA69
6	GO:0016462	pyrophosphatase activity	Molecular Function	51	A4D1E9,O60841,P01111,P04899,P07437,Q16181,Q9BZE4,Q9HCN4,Q9UPQ3,O43933,O60264,P11021,P11142,P17066,P17987,P28288,P35250,P35251,P38646,P40227,P49368,P49736,P50990,P50991,P78371,Q13459,Q14807,Q6P158,Q7L2E3,Q8IY37,Q8IYT4,Q8NB90,Q8NBU5,Q8NE71,Q8NHQ9,Q8NI77,Q8TDD1,Q96GQ7,Q96Q89,Q96QE3,Q96RR1,Q99832,Q9BQ39,Q9GZR7,Q9H0S4,Q9H6S0,Q9HCE1,Q9NR30,Q9NTK5,Q9NVP1,Q9NYC9
6	GO:0004122	cystathionine beta-synthase activity	Molecular Function	1	P35520
6	GO:0004813	alanine-tRNA ligase activity	Molecular Function	1	P49588
6	GO:0004831	tyrosine-tRNA ligase activity	Molecular Function	1	Q9Y2Z4
6	GO:0016211	ammonia ligase activity	Molecular Function	1	P15104
6	GO:0003952	NAD+ synthase (glutamine-hydrolyzing) activity	Molecular Function	1	Q6IA69
6	GO:0004066	asparagine synthase (glutamine-hydrolyzing) activity	Molecular Function	1	P08243
6	GO:0004642	phosphoribosylformylglycinamidine synthase activity	Molecular Function	1	O15067
6	GO:0004485	methylcrotonoyl-CoA carboxylase activity	Molecular Function	1	Q9HCC0
6	GO:0003910	DNA ligase (ATP) activity	Molecular Function	1	P49917
6	GO:0004677	DNA-dependent protein kinase activity	Molecular Function	1	P78527
6	GO:0004683	calmodulin-dependent protein kinase activity	Molecular Function	1	P46020
6	GO:0004693	cyclin-dependent protein serine/threonine kinase activity	Molecular Function	2	P50613,Q07002
6	GO:0004697	protein kinase C activity	Molecular Function	1	P41743
6	GO:0004707	MAP kinase activity	Molecular Function	2	P27361,Q8TD08
6	GO:0004709	MAP kinase kinase kinase activity	Molecular Function	1	P10398
6	GO:0008353	RNA polymerase II CTD heptapeptide repeat kinase activity	Molecular Function	1	P50613
6	GO:0008384	IkappaB kinase activity	Molecular Function	1	O15111
6	GO:0009931	calcium-dependent protein serine/threonine kinase activity	Molecular Function	1	P41743
6	GO:0035184	histone threonine kinase activity	Molecular Function	1	Q9Y4B6
6	GO:0004708	MAP kinase kinase activity	Molecular Function	1	P27361
6	GO:0004715	non-membrane spanning protein tyrosine kinase activity	Molecular Function	1	P19525
6	GO:0008420	RNA polymerase II CTD heptapeptide repeat phosphatase activity	Molecular Function	1	Q8IXW5
6	GO:0017018	myosin phosphatase activity	Molecular Function	3	O00743,P67775,Q8IXW5
6	GO:0018024	histone-lysine N-methyltransferase activity	Molecular Function	2	O96028,Q15910
6	GO:0003880	protein C-terminal carboxyl O-methyltransferase activity	Molecular Function	1	O60725
6	GO:0017136	NAD-dependent histone deacetylase activity	Molecular Function	1	Q96EB6
6	GO:0031078	histone deacetylase activity (H3-K14 specific)	Molecular Function	1	Q96EB6
6	GO:0032129	histone deacetylase activity (H3-K9 specific)	Molecular Function	1	Q96EB6
6	GO:0034739	histone deacetylase activity (H4-K16 specific)	Molecular Function	1	Q96EB6
6	GO:0003887	DNA-directed DNA polymerase activity	Molecular Function	1	Q8NDF8
6	GO:0004521	endoribonuclease activity	Molecular Function	3	O75817,O95707,Q9H8Y5
6	GO:0004532	exoribonuclease activity	Molecular Function	5	O00411,Q01780,Q06265,Q504Q3,Q9UIV1
6	GO:0004549	tRNA-specific ribonuclease activity	Molecular Function	2	O75817,O95707
6	GO:0008174	mRNA methyltransferase activity	Molecular Function	1	Q9BVS5
6	GO:0008175	tRNA methyltransferase activity	Molecular Function	3	Q7Z2T5,Q9BVS5,Q96GJ1
6	GO:0008649	rRNA methyltransferase activity	Molecular Function	7	Q9UNQ2,Q9H5U6,P46087,Q96P11,Q9BVS5,Q6IN84,Q96GJ1
6	GO:0062105	RNA 2'-O-methyltransferase activity	Molecular Function	1	Q6IN84
6	GO:1990276	RNA 5'-methyltransferase activity	Molecular Function	1	Q7L2J0
6	GO:0034062	5'-3' RNA polymerase activity	Molecular Function	7	O15160,O00411,P52434,Q4G0F4,Q9H1D9,Q9H9Y6,Q9NW08
6	GO:0005283	amino acid:sodium symporter activity	Molecular Function	1	Q9H2H9
6	GO:0005310	dicarboxylic acid transmembrane transporter activity	Molecular Function	2	Q15758,Q9UJS0
6	GO:0015171	amino acid transmembrane transporter activity	Molecular Function	5	P30825,Q9H2H9,Q9UJS0,Q15758,Q9BWM7
6	GO:0005261	cation channel activity	Molecular Function	1	P39086
6	GO:0015276	ligand-gated ion channel activity	Molecular Function	1	P39086
6	GO:0000064	L-ornithine transmembrane transporter activity	Molecular Function	1	P30825
6	GO:0015186	L-glutamine transmembrane transporter activity	Molecular Function	2	Q15758,Q9H2H9
6	GO:0015187	glycine transmembrane transporter activity	Molecular Function	1	Q9H2H9
6	GO:0015189	L-lysine transmembrane transporter activity	Molecular Function	1	P30825
6	GO:0022858	alanine transmembrane transporter activity	Molecular Function	1	Q9H2H9
6	GO:0022889	serine transmembrane transporter activity	Molecular Function	2	Q15758,Q9BWM7
6	GO:0061459	L-arginine transmembrane transporter activity	Molecular Function	1	P30825
6	GO:0008514	organic anion transmembrane transporter activity	Molecular Function	5	P30825,Q9UJS0,Q15758,Q9H2H9,Q9BWM7
6	GO:0009678	pyrophosphate hydrolysis-driven proton transmembrane transporter activity	Molecular Function	1	Q9UI12
6	GO:0015294	solute:cation symporter activity	Molecular Function	1	Q9H2H9
6	GO:0015078	proton transmembrane transporter activity	Molecular Function	1	Q9UI12
6	GO:0046873	metal ion transmembrane transporter activity	Molecular Function	3	Q9H2H9,Q6P4Q7,P39086
6	GO:0022836	gated channel activity	Molecular Function	2	P39086,Q15758
6	GO:0015293	symporter activity	Molecular Function	2	Q9H2H9,Q15758
6	GO:0015297	antiporter activity	Molecular Function	1	Q15758
6	GO:0015453	oxidoreduction-driven active transmembrane transporter activity	Molecular Function	1	Q16795
6	GO:0001091	RNA polymerase II general transcription initiation factor binding	Molecular Function	2	P20226,P04637
6	GO:0031701	angiotensin receptor binding	Molecular Function	1	P49407
6	GO:0042379	chemokine receptor binding	Molecular Function	1	P42224
6	GO:0050780	dopamine receptor binding	Molecular Function	1	Q9Y5X3
6	GO:0005160	transforming growth factor beta receptor binding	Molecular Function	1	Q9UNH7
6	GO:0005165	neurotrophin receptor binding	Molecular Function	1	P19174
6	GO:0032813	tumor necrosis factor receptor superfamily binding	Molecular Function	4	Q9UKL3,P42224,Q9BUZ4,Q9NXR7
6	GO:0042288	MHC class I protein binding	Molecular Function	1	P07437
6	GO:0005154	epidermal growth factor receptor binding	Molecular Function	2	O60749,Q13596
6	GO:0008017	microtubule binding	Molecular Function	18	Q8NI77,A0A590UJG2,A0A6Q8PFA6,P49754,P78559,Q08379,Q14807,Q66K74,Q7Z4H7,Q8IYT4,Q92974,Q96BD8,Q96Q89,Q96SI9,Q9BT25,Q9BXS6,Q9GZM8,Q9NYZ3
6	GO:0043014	alpha-tubulin binding	Molecular Function	3	Q15813,Q9GZM8,Q9NQA3
6	GO:0043015	gamma-tubulin binding	Molecular Function	2	Q14155,Q9NQA3
6	GO:0048487	beta-tubulin binding	Molecular Function	4	P42858,Q66K74,Q9BTW9,Q9GZM8
6	GO:0032027	myosin light chain binding	Molecular Function	1	Q86VI3
6	GO:0070853	myosin VI binding	Molecular Function	1	Q86VI3
6	GO:0051393	alpha-actinin binding	Molecular Function	2	Q8WZ42,Q96QZ7
6	GO:0001222	transcription corepressor binding	Molecular Function	5	P42224,Q15022,Q15370,Q15910,Q9Y483
6	GO:0001223	transcription coactivator binding	Molecular Function	2	P42224,Q15648
6	GO:0001025	RNA polymerase III general transcription initiation factor binding	Molecular Function	1	P42345
6	GO:0017025	TBP-class protein binding	Molecular Function	1	Q53T94
6	GO:0043425	bHLH transcription factor binding	Molecular Function	2	Q86XI2,Q96EB6
6	GO:0061629	RNA polymerase II-specific DNA-binding transcription factor binding	Molecular Function	20	P42224,Q15648,Q96EB6,Q9UIF9,P20226,P49848,Q8TDD1,Q9Y4B6,P06748,Q9NPJ6,P32780,Q9UER7,O94888,P04637,P28370,P52952,P78527,Q01831,Q06265,Q96T58
6	GO:0089720	caspase binding	Molecular Function	1	O14730
6	GO:1990381	ubiquitin-specific protease binding	Molecular Function	2	P46379,Q15020
6	GO:0019901	protein kinase binding	Molecular Function	18	P04637,P19174,Q14596,Q96EB6,O75367,O94874,O95573,P06748,P50851,P62753,P68366,Q08379,Q14155,Q8WZ42,Q9BUZ4,Q9UER7,Q9UMX1,Q9Y4P3
6	GO:0019903	protein phosphatase binding	Molecular Function	7	P04637,P42224,P62258,Q92845,Q9UJX3,Q9UJX4,Q9UJX5
6	GO:0031625	ubiquitin protein ligase binding	Molecular Function	28	A8K9U1,O94888,P04637,P07437,P11021,P11142,P17066,P17987,P29590,P35520,P38398,P38646,P46379,P46777,P49407,P62258,P78371,Q13564,Q13617,Q149N8,Q15370,Q15843,Q8TCT9,Q96CS3,Q9BUZ4,Q9NYB9,Q9UER7,Q9Y4X5
6	GO:0031624	ubiquitin conjugating enzyme binding	Molecular Function	3	O95376,Q9UBW7,Q9Y4X5
6	GO:0031267	small GTPase binding	Molecular Function	14	O14980,O15397,O43592,O43747,O95373,Q13459,Q15042,Q86VI3,Q92974,Q96F07,Q96P70,Q9UI26,Q9UIA9,Q9Y5L0
6	GO:0043175	RNA polymerase core enzyme binding	Molecular Function	1	Q8IXW5
6	GO:0043522	leucine zipper domain binding	Molecular Function	1	Q96IZ0
6	GO:0032184	SUMO polymer binding	Molecular Function	1	Q9UKL3
6	GO:1990889	H4K20me3 modified histone binding	Molecular Function	1	Q13610
6	GO:0098632	cell-cell adhesion mediator activity	Molecular Function	1	Q08722
6	GO:0001784	phosphotyrosine residue binding	Molecular Function	1	P27361
6	GO:0050815	phosphoserine residue binding	Molecular Function	1	P62258
6	GO:0070530	K63-linked polyubiquitin modification-dependent protein binding	Molecular Function	1	Q562E7
6	GO:0140036	ubiquitin-dependent protein binding	Molecular Function	1	O43933
6	GO:0140037	sumo-dependent protein binding	Molecular Function	2	P29590,Q9UER7
6	GO:0160004	poly-ADP-D-ribose modification-dependent protein binding	Molecular Function	1	O75367
6	GO:0005545	1-phosphatidylinositol binding	Molecular Function	1	P11171
6	GO:1901981	phosphatidylinositol phosphate binding	Molecular Function	4	Q9P0L2,Q9Y5X3,Q96L92,A7KAX9
6	GO:0000268	peroxisome targeting sequence binding	Molecular Function	1	Q9NXR7
6	GO:0008139	nuclear localization sequence binding	Molecular Function	3	O60518,P52292,Q7Z569
6	GO:0030942	endoplasmic reticulum signal peptide binding	Molecular Function	1	P37108
6	GO:0019001	guanyl nucleotide binding	Molecular Function	15	A4D1E9,O60841,P01111,P04899,P07437,P68366,Q16181,Q38SD2,Q9BQE3,Q9BVP2,Q9BZE4,Q9HCN4,Q9NTK5,Q9NVN8,Q9UPQ3
6	GO:0030554	adenyl nucleotide binding	Molecular Function	86	O95817,A0A6Q8PFA6,O00160,O14730,O15067,O15111,O43933,O60264,O95573,P08243,P10398,P11021,P11142,P11387,P15104,P17066,P17987,P19525,P20585,P27361,P28288,P28370,P35250,P35251,P38646,P40227,P41743,P42345,P49368,P49588,P49736,P49917,P50613,P50990,P50991,P61081,P62256,P78362,P78368,P78371,P78527,Q02880,Q07002,Q13459,Q13523,Q14807,Q149N8,Q38SD2,Q6IA69,Q6P158,Q7L2E3,Q8IY37,Q8IYT4,Q8NB90,Q8NBU5,Q8NE71,Q8N…
6	GO:0071949	FAD binding	Molecular Function	1	P42898
6	GO:0016595	glutamate binding	Molecular Function	1	Q14831
6	GO:0005524	ATP binding	Molecular Function	84	A0A6Q8PFA6,O00160,O14730,O15067,O15111,O43933,O60264,O95573,P08243,P10398,P11021,P11142,P11387,P15104,P17066,P17987,P19525,P20585,P27361,P28288,P28370,P35250,P35251,P38646,P40227,P41743,P42345,P49368,P49588,P49736,P49917,P50613,P50990,P50991,P61081,P62256,P78362,P78368,P78371,P78527,Q02880,Q07002,Q13459,Q13523,Q14807,Q149N8,Q38SD2,Q6IA69,Q6P158,Q7L2E3,Q8IY37,Q8IYT4,Q8NB90,Q8NBU5,Q8NE71,Q8NHQ9,Q8N…
6	GO:0005525	GTP binding	Molecular Function	15	A4D1E9,O60841,P01111,P04899,P07437,P68366,Q16181,Q38SD2,Q9BQE3,Q9BVP2,Q9BZE4,Q9HCN4,Q9NTK5,Q9NVN8,Q9UPQ3
6	GO:0000287	magnesium ion binding	Molecular Function	5	A4D1E9,P78362,Q96PN6,Q96SB4,Q9P0L2
6	GO:0005509	calcium ion binding	Molecular Function	9	A0A590UJG2,P11021,P19174,P27824,P43304,P62760,Q14831,Q8WZ42,Q9UJS0
6	GO:0046914	transition metal ion binding	Molecular Function	29	P02792,P02794,Q9NVH6,P04637,A7E2V4,O60941,O95376,P29590,P38398,P49588,P49711,Q14596,Q2Q1W2,Q5F1R6,Q5TAX3,Q6ZN17,Q7Z569,Q8IXK0,Q92974,Q96DX7,Q99707,Q9BUZ4,Q9H5U6,Q9NP64,Q9NRW3,Q9UBW7,Q9Y4X5,Q9Y6Q3,Q96PN6
6	GO:0097177	mitochondrial ribosome binding	Molecular Function	1	Q92552
6	GO:0000976	transcription cis-regulatory region binding	Molecular Function	35	O75367,P18847,P42224,Q3KP31,Q8TF47,Q8WY36,Q96QR8,Q99459,Q9Y483,Q9Y6Q3,O15198,O95625,P04637,P11387,P20226,P49711,P51814,P52952,Q09028,Q15022,Q15648,Q15776,Q15910,Q32MZ4,Q6ZN55,Q8TF39,Q96EB6,Q96K58,P42345,O00411,P06748,P17480,Q53T94,Q9BQG0,P38398
6	GO:0000217	DNA secondary structure binding	Molecular Function	2	Q01831,P07305
6	GO:0003684	damaged DNA binding	Molecular Function	3	P38398,Q01831,Q16531
6	GO:0003690	double-stranded DNA binding	Molecular Function	51	O75367,Q01831,P04637,P18847,P20226,P38398,P49711,P52952,P42224,Q3KP31,Q8TF47,Q8WY36,Q96QR8,Q99459,Q9Y483,Q9Y6Q3,O15198,O95625,P11387,P51814,Q09028,Q15022,Q15648,Q15776,Q15910,Q32MZ4,Q6ZN55,Q8TF39,Q96EB6,Q96K58,P42345,O00411,P06748,P17480,Q53T94,O75419,P49736,Q9BQ67,P20585,Q9BQG0,O75475,P67809,Q6ZN17,P07305,P16403,P35251,P78527,Q13325,Q92522,Q99551,Q9H1D9
6	GO:0003697	single-stranded DNA binding	Molecular Function	9	P04637,P28370,O75419,P11387,P49736,P52434,Q01831,Q96QR8,Q96RR1
6	GO:0008301	DNA binding, bending	Molecular Function	1	P11387
6	GO:0043565	sequence-specific DNA binding	Molecular Function	43	O75367,P04637,P18847,P20226,P38398,P49711,P52952,P42224,Q3KP31,Q8TF47,Q8WY36,Q96QR8,Q99459,Q9Y483,Q9Y6Q3,O15198,O95625,P11387,P51814,Q09028,Q15022,Q15648,Q15776,Q15910,Q32MZ4,Q6ZN55,Q8TF39,Q96EB6,Q96K58,P42345,O00411,P06748,P17480,Q53T94,O75419,P49736,Q9BQ67,P19338,Q9BQG0,P67809,Q6ZN17,O96028,P35251
6	GO:0000049	tRNA binding	Molecular Function	11	O43592,O60524,O60841,P05455,P18077,P49588,Q13325,Q7Z2T5,Q92552,Q9H0A0,Q9Y2Z4
6	GO:0000339	RNA cap binding	Molecular Function	1	Q13325
6	GO:0002151	G-quadruplex RNA binding	Molecular Function	1	Q7L2E3
6	GO:0003725	double-stranded RNA binding	Molecular Function	7	O75569,P19525,Q32MZ4,Q7L2E3,Q96SI9,Q9NR30,Q9Y6K5
6	GO:0003727	single-stranded RNA binding	Molecular Function	4	P05455,Q13325,Q01780,Q96SI9
6	GO:0003729	mRNA binding	Molecular Function	23	O00425,P04637,P46777,Q9BRU9,Q9NZI8,Q06265,P19338,P61247,P61254,Q9BVP2,P05455,O75153,P15880,P18124,P40429,P42766,P83731,Q4G0J3,Q6ZN17,Q8N5C6,Q8WVV9,Q96QR8,Q96T58
6	GO:0008312	7S RNA binding	Molecular Function	3	P09132,P37108,P49458
6	GO:0017069	snRNA binding	Molecular Function	4	Q15020,Q4G0J3,Q7L2J0,Q9NR30
6	GO:0019843	rRNA binding	Molecular Function	16	P46777,Q16762,Q9H0U6,Q9H9Y2,P05388,P30050,Q9BRU9,P46781,P06748,P61927,P62280,P62750,P62917,Q92552,Q96EY7,Q9NR30
6	GO:0030515	snoRNA binding	Molecular Function	4	P78527,Q8IY37,Q9H583,Q9NR30
6	GO:0033204	ribonuclease P RNA binding	Molecular Function	2	O75817,O95707
6	GO:0061980	regulatory RNA binding	Molecular Function	5	O75569,P67809,Q2Q1W2,Q5TAX3,Q9NR30
6	GO:0062153	C5-methylcytidine-containing RNA binding	Molecular Function	1	P67809
6	GO:0070034	telomerase RNA binding	Molecular Function	2	Q01780,Q8NDF8
6	GO:0070878	primary miRNA binding	Molecular Function	1	Q15910
6	GO:0070883	pre-miRNA binding	Molecular Function	1	O75569
6	GO:0106222	lncRNA binding	Molecular Function	3	O60216,Q15022,Q15910
6	GO:1904678	alpha-aminoacyl-tRNA binding	Molecular Function	1	O60524
6	GO:1990247	N6-methyladenosine-containing RNA binding	Molecular Function	3	O00425,Q9H6S0,Q9NZI8
6	GO:1990814	DNA/DNA annealing activity	Molecular Function	2	P04637,P28370
6	GO:0032559	adenyl ribonucleotide binding	Molecular Function	85	A0A6Q8PFA6,O00160,O14730,O15067,O15111,O43933,O60264,O95573,P08243,P10398,P11021,P11142,P11387,P15104,P17066,P17987,P19525,P20585,P27361,P28288,P28370,P35250,P35251,P38646,P40227,P41743,P42345,P49368,P49588,P49736,P49917,P50613,P50990,P50991,P61081,P62256,P78362,P78368,P78371,P78527,Q02880,Q07002,Q13459,Q13523,Q14807,Q149N8,Q38SD2,Q6IA69,Q6P158,Q7L2E3,Q8IY37,Q8IYT4,Q8NB90,Q8NBU5,Q8NE71,Q8NHQ9,Q8N…
6	GO:0032561	guanyl ribonucleotide binding	Molecular Function	15	A4D1E9,O60841,P01111,P04899,P07437,P68366,Q16181,Q38SD2,Q9BQE3,Q9BVP2,Q9BZE4,Q9HCN4,Q9NTK5,Q9NVN8,Q9UPQ3
6	GO:0001604	urotensin II receptor activity	Molecular Function	1	Q9NQS5
6	GO:0005000	vasopressin receptor activity	Molecular Function	1	Q9BT40
6	GO:0098988	G protein-coupled glutamate receptor activity	Molecular Function	1	Q14831
6	GO:0004970	ionotropic glutamate receptor activity	Molecular Function	1	P39086
6	GO:0022824	transmitter-gated ion channel activity	Molecular Function	1	P39086
6	GO:0099529	neurotransmitter receptor activity involved in regulation of postsynaptic membrane potential	Molecular Function	1	P39086
6	GO:0019855	calcium channel inhibitor activity	Molecular Function	1	Q9UKS6
6	GO:0010854	adenylate cyclase regulator activity	Molecular Function	1	Q14831
6	GO:0004860	protein kinase inhibitor activity	Molecular Function	2	O75367,P06748
6	GO:1990948	ubiquitin ligase inhibitor activity	Molecular Function	2	P46777,P61927
6	GO:0016505	peptidase activator activity involved in apoptotic process	Molecular Function	1	Q9UKL3
6	GO:0061133	endopeptidase activator activity	Molecular Function	2	P61289,Q16186
6	GO:0030295	protein kinase activator activity	Molecular Function	2	P05386,Q9UER7
6	GO:0072542	protein phosphatase activator activity	Molecular Function	2	Q13362,Q14738
6	GO:0005085	guanyl-nucleotide exchange factor activity	Molecular Function	8	O94887,Q13144,Q14155,Q15042,Q8TER5,Q92974,Q9HCU5,Q9Y6D5
7	GO:0052590	sn-glycerol-3-phosphate:ubiquinone oxidoreductase activity	Molecular Function	1	P43304
7	GO:0106313	methylenetetrahydrofolate reductase NADPH activity	Molecular Function	1	P42898
7	GO:0004754	saccharopine dehydrogenase (NAD+, L-lysine-forming) activity	Molecular Function	1	Q9UDR5
7	GO:0047130	saccharopine dehydrogenase (NADP+, L-lysine-forming) activity	Molecular Function	1	Q9UDR5
7	GO:0047131	saccharopine dehydrogenase (NAD+, L-glutamate-forming) activity	Molecular Function	1	Q9UDR5
7	GO:0009383	rRNA (cytosine-C5-)-methyltransferase activity	Molecular Function	2	P46087,Q96P11
7	GO:0070041	rRNA (uridine-C5-)-methyltransferase activity	Molecular Function	1	Q96GJ1
7	GO:0000179	rRNA (adenine-N6,N6-)-dimethyltransferase activity	Molecular Function	1	Q9UNQ2
7	GO:0004809	tRNA (guanine-N2-)-methyltransferase activity	Molecular Function	1	Q7Z2T5
7	GO:0008988	rRNA (adenine-N6-)-methyltransferase activity	Molecular Function	1	Q9H5U6
7	GO:0016278	lysine N-methyltransferase activity	Molecular Function	2	Q15910,O96028
7	GO:0010340	carboxyl-O-methyltransferase activity	Molecular Function	1	O60725
7	GO:0008705	methionine synthase activity	Molecular Function	1	Q99707
7	GO:0004671	protein C-terminal S-isoprenylcysteine carboxyl O-methyltransferase activity	Molecular Function	1	O60725
7	GO:0016423	tRNA (guanine) methyltransferase activity	Molecular Function	1	Q7Z2T5
7	GO:0016426	tRNA (adenine) methyltransferase activity	Molecular Function	1	Q9BVS5
7	GO:0030697	S-adenosylmethionine-dependent tRNA (m5U54) methyltransferase activity	Molecular Function	1	Q96GJ1
7	GO:0016406	carnitine O-acyltransferase activity	Molecular Function	1	P50416
7	GO:0016413	O-acetyltransferase activity	Molecular Function	1	Q96PB1
7	GO:0016416	O-palmitoyltransferase activity	Molecular Function	1	P50416
7	GO:0008080	N-acetyltransferase activity	Molecular Function	2	Q56NI9,Q9H0A0
7	GO:0106231	protein-propionyllysine depropionylase activity	Molecular Function	1	Q96EB6
7	GO:0160012	NAD-dependent histone decrotonylase activity	Molecular Function	1	Q96EB6
7	GO:0004360	glutamine-fructose-6-phosphate transaminase (isomerizing) activity	Molecular Function	1	Q06210
7	GO:0000309	nicotinamide-nucleotide adenylyltransferase activity	Molecular Function	1	Q9HAN9
7	GO:0001730	2'-5'-oligoadenylate synthetase activity	Molecular Function	1	Q9Y6K5
7	GO:0004515	nicotinate-nucleotide adenylyltransferase activity	Molecular Function	1	Q9HAN9
7	GO:0004652	polynucleotide adenylyltransferase activity	Molecular Function	1	Q8NDF8
7	GO:0034450	ubiquitin-ubiquitin ligase activity	Molecular Function	1	Q9UMS4
7	GO:0042500	aspartic endopeptidase activity, intramembrane cleaving	Molecular Function	1	Q8TCT9
7	GO:0070006	metalloaminopeptidase activity	Molecular Function	1	Q6UB28
7	GO:1990380	Lys48-specific deubiquitinase activity	Molecular Function	1	Q93009
7	GO:0016893	endonuclease activity, active with either ribo- or deoxyribonucleic acids and producing 5'-phosphomonoesters	Molecular Function	2	O75817,O95707
7	GO:0008408	3'-5' exonuclease activity	Molecular Function	5	O00411,Q01780,Q06265,Q504Q3,Q9UIV1
7	GO:0016796	exonuclease activity, active with either ribo- or deoxyribonucleic acids and producing 5'-phosphomonoesters	Molecular Function	5	O00411,Q01780,Q06265,Q504Q3,Q9UIV1
7	GO:0004629	phospholipase C activity	Molecular Function	1	P19174
7	GO:0047617	acyl-CoA hydrolase activity	Molecular Function	1	P28288
7	GO:0008252	nucleotidase activity	Molecular Function	1	Q9H857
7	GO:0042577	lipid phosphatase activity	Molecular Function	1	Q9BT40
7	GO:0052745	inositol phosphate phosphatase activity	Molecular Function	1	Q9BT40
7	GO:0052866	phosphatidylinositol phosphate phosphatase activity	Molecular Function	1	Q9BT40
7	GO:0002196	Ser-tRNA(Ala) hydrolase activity	Molecular Function	1	P49588
7	GO:0004415	hyalurononglucosaminidase activity	Molecular Function	1	O60502
7	GO:0004563	beta-N-acetylhexosaminidase activity	Molecular Function	1	O60502
7	GO:0061809	NAD+ nucleotidase, cyclic ADP-ribose generating	Molecular Function	1	Q6SZW1
7	GO:0017111	nucleoside-triphosphatase activity	Molecular Function	51	A4D1E9,O60841,P01111,P04899,P07437,Q16181,Q9BZE4,Q9HCN4,Q9UPQ3,O43933,O60264,P11021,P11142,P17066,P17987,P28288,P35250,P35251,P38646,P40227,P49368,P49736,P50990,P50991,P78371,Q13459,Q14807,Q6P158,Q7L2E3,Q8IY37,Q8IYT4,Q8NB90,Q8NBU5,Q8NE71,Q8NHQ9,Q8NI77,Q8TDD1,Q96GQ7,Q96Q89,Q96QE3,Q96RR1,Q99832,Q9BQ39,Q9GZR7,Q9H0S4,Q9H6S0,Q9HCE1,Q9NR30,Q9NTK5,Q9NVP1,Q9NYC9
7	GO:0004356	glutamate-ammonia ligase activity	Molecular Function	1	P15104
7	GO:0004689	phosphorylase kinase activity	Molecular Function	1	P46020
7	GO:0004698	calcium-dependent protein kinase C activity	Molecular Function	1	P41743
7	GO:1990244	histone kinase activity (H2A-T120 specific)	Molecular Function	1	Q9Y4B6
7	GO:0042799	histone methyltransferase activity (H4-K20 specific)	Molecular Function	1	O96028
7	GO:0046975	histone methyltransferase activity (H3-K36 specific)	Molecular Function	1	O96028
7	GO:0046976	histone methyltransferase activity (H3-K27 specific)	Molecular Function	1	Q15910
7	GO:0032041	NAD-dependent histone deacetylase activity (H3-K14 specific)	Molecular Function	1	Q96EB6
7	GO:0046969	NAD-dependent histone deacetylase activity (H3-K9 specific)	Molecular Function	1	Q96EB6
7	GO:0046970	NAD-dependent histone deacetylase activity (H4-K16 specific)	Molecular Function	1	Q96EB6
7	GO:0016891	endoribonuclease activity, producing 5'-phosphomonoesters	Molecular Function	2	O75817,O95707
7	GO:0016896	exoribonuclease activity, producing 5'-phosphomonoesters	Molecular Function	5	O00411,Q01780,Q06265,Q504Q3,Q9UIV1
7	GO:0004526	ribonuclease P activity	Molecular Function	2	O75817,O95707
7	GO:0061953	mRNA (adenine-N1-)-methyltransferase activity	Molecular Function	1	Q9BVS5
7	GO:0016300	tRNA (uracil) methyltransferase activity	Molecular Function	1	Q96GJ1
7	GO:0016433	rRNA (adenine) methyltransferase activity	Molecular Function	3	Q9UNQ2,Q9H5U6,Q9BVS5
7	GO:0016434	rRNA (cytosine) methyltransferase activity	Molecular Function	2	P46087,Q96P11
7	GO:0016435	rRNA (guanine) methyltransferase activity	Molecular Function	1	Q6IN84
7	GO:0016436	rRNA (uridine) methyltransferase activity	Molecular Function	1	Q96GJ1
7	GO:0070039	rRNA (guanosine-2'-O-)-methyltransferase activity	Molecular Function	1	Q6IN84
7	GO:0003899	DNA-directed 5'-3' RNA polymerase activity	Molecular Function	7	O15160,O00411,P52434,Q4G0F4,Q9H1D9,Q9H9Y6,Q9NW08
7	GO:0005295	neutral amino acid:sodium symporter activity	Molecular Function	1	Q9H2H9
7	GO:0005298	proline:sodium symporter activity	Molecular Function	1	Q9H2H9
7	GO:0015655	alanine:sodium symporter activity	Molecular Function	1	Q9H2H9
7	GO:0015183	L-aspartate transmembrane transporter activity	Molecular Function	2	Q15758,Q9UJS0
7	GO:0005416	amino acid:cation symporter activity	Molecular Function	1	Q9H2H9
7	GO:0015172	acidic amino acid transmembrane transporter activity	Molecular Function	2	Q9UJS0,Q15758
7	GO:0015173	aromatic amino acid transmembrane transporter activity	Molecular Function	1	P30825
7	GO:0015174	basic amino acid transmembrane transporter activity	Molecular Function	1	P30825
7	GO:0015175	neutral amino acid transmembrane transporter activity	Molecular Function	3	Q9H2H9,Q15758,Q9BWM7
7	GO:0015179	L-amino acid transmembrane transporter activity	Molecular Function	4	P30825,Q9UJS0,Q15758,Q9H2H9
7	GO:0005267	potassium channel activity	Molecular Function	1	P39086
7	GO:0005272	sodium channel activity	Molecular Function	1	P39086
7	GO:0099094	ligand-gated cation channel activity	Molecular Function	1	P39086
7	GO:0005230	extracellular ligand-gated ion channel activity	Molecular Function	1	P39086
7	GO:0015375	glycine:sodium symporter activity	Molecular Function	1	Q9H2H9
7	GO:0015194	L-serine transmembrane transporter activity	Molecular Function	1	Q15758
7	GO:0005313	L-glutamate transmembrane transporter activity	Molecular Function	1	Q9UJS0
7	GO:0015556	C4-dicarboxylate transmembrane transporter activity	Molecular Function	2	Q15758,Q9UJS0
7	GO:0015370	solute:sodium symporter activity	Molecular Function	1	Q9H2H9
7	GO:0015079	potassium ion transmembrane transporter activity	Molecular Function	1	P39086
7	GO:0015081	sodium ion transmembrane transporter activity	Molecular Function	3	Q9H2H9,P39086,Q6P4Q7
7	GO:0015095	magnesium ion transmembrane transporter activity	Molecular Function	1	Q6P4Q7
7	GO:0022834	ligand-gated channel activity	Molecular Function	2	P39086,Q15758
7	GO:0001093	TFIIB-class transcription factor binding	Molecular Function	1	P20226
7	GO:0048020	CCR chemokine receptor binding	Molecular Function	1	P42224
7	GO:0031748	D1 dopamine receptor binding	Molecular Function	1	Q9Y5X3
7	GO:0034713	type I transforming growth factor beta receptor binding	Molecular Function	1	Q9UNH7
7	GO:0005167	neurotrophin TRK receptor binding	Molecular Function	1	P19174
7	GO:0005123	death receptor binding	Molecular Function	1	Q9UKL3
7	GO:0005164	tumor necrosis factor receptor binding	Molecular Function	3	P42224,Q9BUZ4,Q9NXR7
7	GO:0051010	microtubule plus-end binding	Molecular Function	1	Q8NI77
7	GO:0070856	myosin VI light chain binding	Molecular Function	1	Q86VI3
7	GO:0051371	muscle alpha-actinin binding	Molecular Function	1	Q8WZ42
7	GO:0001156	TFIIIC-class transcription factor complex binding	Molecular Function	1	P42345
7	GO:0016922	nuclear receptor binding	Molecular Function	9	Q15648,Q8TDD1,Q9Y4B6,Q9NPJ6,P32780,Q9UER7,P42224,Q96EB6,Q9UIF9
7	GO:0030957	Tat protein binding	Molecular Function	1	P06748
7	GO:0051059	NF-kappaB binding	Molecular Function	1	P06748
7	GO:0051019	mitogen-activated protein kinase binding	Molecular Function	2	Q14596,Q96EB6
7	GO:1990782	protein tyrosine kinase binding	Molecular Function	2	P04637,P19174
7	GO:0051721	protein phosphatase 2A binding	Molecular Function	2	P04637,P42224
7	GO:0086080	protein binding involved in heterotypic cell-cell adhesion	Molecular Function	1	Q08722
7	GO:0010314	phosphatidylinositol-5-phosphate binding	Molecular Function	1	Q9Y5X3
7	GO:0032266	phosphatidylinositol-3-phosphate binding	Molecular Function	1	Q96L92
7	GO:0070273	phosphatidylinositol-4-phosphate binding	Molecular Function	1	Q9Y5X3
7	GO:1902936	phosphatidylinositol bisphosphate binding	Molecular Function	2	Q9P0L2,Q9Y5X3
7	GO:0005506	iron ion binding	Molecular Function	3	P02792,P02794,Q9NVH6
7	GO:0005507	copper ion binding	Molecular Function	1	P04637
7	GO:0008270	zinc ion binding	Molecular Function	25	A7E2V4,O60941,O95376,P04637,P29590,P38398,P49588,P49711,Q14596,Q2Q1W2,Q5F1R6,Q5TAX3,Q6ZN17,Q7Z569,Q8IXK0,Q92974,Q96DX7,Q99707,Q9BUZ4,Q9H5U6,Q9NP64,Q9NRW3,Q9UBW7,Q9Y4X5,Q9Y6Q3
7	GO:0030145	manganese ion binding	Molecular Function	1	Q96PN6
7	GO:0050897	cobalt ion binding	Molecular Function	1	P29590
7	GO:0000977	RNA polymerase II transcription regulatory region sequence-specific DNA binding	Molecular Function	29	O15198,O95625,P04637,P11387,P18847,P20226,P42224,P49711,P51814,P52952,Q09028,Q15022,Q15648,Q15776,Q15910,Q32MZ4,Q6ZN55,Q8TF39,Q96EB6,Q96K58,Q9BQG0,O75367,Q3KP31,Q8TF47,Q8WY36,Q96QR8,Q99459,Q9Y483,Q9Y6Q3
7	GO:0000987	cis-regulatory region sequence-specific DNA binding	Molecular Function	22	O15198,O95625,P04637,P11387,P18847,P20226,P42224,P49711,P51814,P52952,Q09028,Q15022,Q15648,Q15776,Q15910,Q32MZ4,Q6ZN55,Q8TF39,Q96EB6,Q96K58,P42345,Q9BQG0
7	GO:0001016	RNA polymerase III transcription regulatory region sequence-specific DNA binding	Molecular Function	1	P42345
7	GO:0001018	mitochondrial promoter sequence-specific DNA binding	Molecular Function	1	O00411
7	GO:0001046	core promoter sequence-specific DNA binding	Molecular Function	7	P20226,P42224,Q15910,P17480,Q53T94,P04637,P06748
7	GO:0001163	RNA polymerase I transcription regulatory region sequence-specific DNA binding	Molecular Function	2	P17480,Q53T94
7	GO:0032422	purine-rich negative regulatory element binding	Molecular Function	1	Q96QR8
7	GO:0000404	heteroduplex DNA loop binding	Molecular Function	1	Q01831
7	GO:0000405	bubble DNA binding	Molecular Function	1	Q01831
7	GO:0003680	minor groove of adenine-thymine-rich DNA binding	Molecular Function	1	P07305
7	GO:0010385	double-stranded methylated DNA binding	Molecular Function	1	O75367
7	GO:0030983	mismatched DNA binding	Molecular Function	2	Q01831,P20585
7	GO:0097100	supercoiled DNA binding	Molecular Function	2	O75475,P11387
7	GO:1990837	sequence-specific double-stranded DNA binding	Molecular Function	40	O75367,P04637,P18847,P20226,P38398,P49711,P52952,P42224,Q3KP31,Q8TF47,Q8WY36,Q96QR8,Q99459,Q9Y483,Q9Y6Q3,O15198,O95625,P11387,P51814,Q09028,Q15022,Q15648,Q15776,Q15910,Q32MZ4,Q6ZN55,Q8TF39,Q96EB6,Q96K58,P42345,O00411,P06748,P17480,Q53T94,O75419,P49736,Q9BQ67,Q9BQG0,P67809,Q6ZN17
7	GO:0042162	telomeric DNA binding	Molecular Function	1	P19338
7	GO:0008187	poly-pyrimidine tract binding	Molecular Function	2	P05455,Q13325
7	GO:0003730	mRNA 3'-UTR binding	Molecular Function	6	Q06265,O00425,P04637,P46777,Q9BRU9,Q9NZI8
7	GO:0048027	mRNA 5'-UTR binding	Molecular Function	8	O00425,P19338,P46777,P61247,P61254,Q9BRU9,Q9BVP2,Q9NZI8
7	GO:1990825	sequence-specific mRNA binding	Molecular Function	1	P05455
7	GO:0017070	U6 snRNA binding	Molecular Function	2	Q15020,Q4G0J3
7	GO:0030621	U4 snRNA binding	Molecular Function	1	Q15020
7	GO:0030624	U6atac snRNA binding	Molecular Function	1	Q15020
7	GO:0097322	7SK snRNA binding	Molecular Function	3	Q4G0J3,Q7L2J0,Q9NR30
7	GO:0008097	5S rRNA binding	Molecular Function	3	P46777,Q16762,Q9H0U6
7	GO:0042134	rRNA primary transcript binding	Molecular Function	1	Q9H9Y2
7	GO:0070180	large ribosomal subunit rRNA binding	Molecular Function	2	P05388,P30050
7	GO:0070181	small ribosomal subunit rRNA binding	Molecular Function	1	Q9BRU9
7	GO:1990932	5.8S rRNA binding	Molecular Function	1	P46781
7	GO:0034511	U3 snoRNA binding	Molecular Function	2	P78527,Q8IY37
7	GO:0035197	siRNA binding	Molecular Function	1	O75569
7	GO:0035198	miRNA binding	Molecular Function	4	P67809,Q2Q1W2,Q5TAX3,Q9NR30
7	GO:0001640	adenylate cyclase inhibiting G protein-coupled glutamate receptor activity	Molecular Function	1	Q14831
7	GO:0015277	kainate selective glutamate receptor activity	Molecular Function	1	P39086
7	GO:1904315	transmitter-gated ion channel activity involved in regulation of postsynaptic membrane potential	Molecular Function	1	P39086
7	GO:0010855	adenylate cyclase inhibitor activity	Molecular Function	1	Q14831
7	GO:0030291	protein serine/threonine kinase inhibitor activity	Molecular Function	1	O75367
8	GO:0052591	sn-glycerol-3-phosphate:ubiquinone-8 oxidoreductase activity	Molecular Function	1	P43304
8	GO:0052909	18S rRNA (adenine(1779)-N(6)/adenine(1780)-N(6))-dimethyltransferase activity	Molecular Function	1	Q9UNQ2
8	GO:0016429	tRNA (adenine-N1-)-methyltransferase activity	Molecular Function	1	Q9BVS5
8	GO:0004095	carnitine O-palmitoyltransferase activity	Molecular Function	1	P50416
8	GO:0047186	N-acetylneuraminate 7-O(or 9-O)-acetyltransferase activity	Molecular Function	1	Q96PB1
8	GO:0004468	lysine N-acetyltransferase activity, acting on acetyl phosphate as donor	Molecular Function	1	Q56NI9
8	GO:0034212	peptide N-acetyltransferase activity	Molecular Function	1	Q56NI9
8	GO:0106162	mRNA N-acetyltransferase activity	Molecular Function	1	Q9H0A0
8	GO:1990883	rRNA cytidine N-acetyltransferase activity	Molecular Function	1	Q9H0A0
8	GO:1990817	RNA adenylyltransferase activity	Molecular Function	1	Q8NDF8
8	GO:0000175	3'-5'-exoribonuclease activity	Molecular Function	5	Q504Q3,Q9UIV1,O00411,Q01780,Q06265
8	GO:0004435	phosphatidylinositol phospholipase C activity	Molecular Function	1	P19174
8	GO:0050429	calcium-dependent phospholipase C activity	Molecular Function	1	P19174
8	GO:0008253	5'-nucleotidase activity	Molecular Function	1	Q9H857
8	GO:0016312	inositol bisphosphate phosphatase activity	Molecular Function	1	Q9BT40
8	GO:0046030	inositol trisphosphate phosphatase activity	Molecular Function	1	Q9BT40
8	GO:0052743	inositol tetrakisphosphate phosphatase activity	Molecular Function	1	Q9BT40
8	GO:0034593	phosphatidylinositol bisphosphate phosphatase activity	Molecular Function	1	Q9BT40
8	GO:0034594	phosphatidylinositol trisphosphate phosphatase activity	Molecular Function	1	Q9BT40
8	GO:0034595	phosphatidylinositol phosphate 5-phosphatase activity	Molecular Function	1	Q9BT40
8	GO:0016231	beta-N-acetylglucosaminidase activity	Molecular Function	1	O60502
8	GO:0003924	GTPase activity	Molecular Function	9	P01111,A4D1E9,O60841,P04899,P07437,Q16181,Q9BZE4,Q9HCN4,Q9UPQ3
8	GO:0030696	tRNA (m5U54) methyltransferase activity	Molecular Function	1	Q96GJ1
8	GO:0001054	RNA polymerase I activity	Molecular Function	1	O15160
8	GO:0001056	RNA polymerase III activity	Molecular Function	1	O15160
8	GO:0003896	DNA primase activity	Molecular Function	1	O00411
8	GO:0031730	CCR5 chemokine receptor binding	Molecular Function	1	P42224
8	GO:0005168	neurotrophin TRKA receptor binding	Molecular Function	1	P19174
8	GO:0030331	nuclear estrogen receptor binding	Molecular Function	3	Q15648,Q8TDD1,Q9Y4B6
8	GO:0042809	nuclear vitamin D receptor binding	Molecular Function	2	Q15648,Q9NPJ6
8	GO:0042974	nuclear retinoic acid receptor binding	Molecular Function	1	Q15648
8	GO:0046966	nuclear thyroid hormone receptor binding	Molecular Function	3	P32780,Q15648,Q9NPJ6
8	GO:0050681	nuclear androgen receptor binding	Molecular Function	1	Q9UER7
8	GO:0008198	ferrous iron binding	Molecular Function	2	P02792,P02794
8	GO:0008199	ferric iron binding	Molecular Function	2	P02792,P02794
8	GO:0000978	RNA polymerase II cis-regulatory region sequence-specific DNA binding	Molecular Function	21	Q9BQG0,O15198,O95625,P04637,P11387,P18847,P20226,P42224,P49711,P51814,P52952,Q09028,Q15022,Q15648,Q15776,Q15910,Q32MZ4,Q6ZN55,Q8TF39,Q96EB6,Q96K58
8	GO:0000979	RNA polymerase II core promoter sequence-specific DNA binding	Molecular Function	3	P20226,P42224,Q15910
8	GO:0000992	RNA polymerase III cis-regulatory region sequence-specific DNA binding	Molecular Function	1	P42345
8	GO:0001164	RNA polymerase I core promoter sequence-specific DNA binding	Molecular Function	2	P17480,Q53T94
8	GO:0001165	RNA polymerase I cis-regulatory region sequence-specific DNA binding	Molecular Function	1	P17480
8	GO:0032135	DNA insertion or deletion binding	Molecular Function	1	Q01831
8	GO:0000182	rDNA binding	Molecular Function	2	P42345,O75367
8	GO:0003688	DNA replication origin binding	Molecular Function	3	O75419,P49736,Q9BQ67
8	GO:0008266	poly(U) RNA binding	Molecular Function	2	P05455,Q13325
8	GO:0035925	mRNA 3'-UTR AU-rich region binding	Molecular Function	1	Q06265
8	GO:0001642	group III metabotropic glutamate receptor activity	Molecular Function	1	Q14831
9	GO:0004535	poly(A)-specific ribonuclease activity	Molecular Function	2	Q504Q3,Q9UIV1
9	GO:0004445	inositol-polyphosphate 5-phosphatase activity	Molecular Function	1	Q9BT40
9	GO:0052658	inositol-1,4,5-trisphosphate 5-phosphatase activity	Molecular Function	1	Q9BT40
9	GO:0052659	inositol-1,3,4,5-tetrakisphosphate 5-phosphatase activity	Molecular Function	1	Q9BT40
9	GO:0106019	phosphatidylinositol-4,5-bisphosphate phosphatase activity	Molecular Function	1	Q9BT40
9	GO:0034485	phosphatidylinositol-3,4,5-trisphosphate 5-phosphatase activity	Molecular Function	1	Q9BT40
9	GO:0004439	phosphatidylinositol-4,5-bisphosphate 5-phosphatase activity	Molecular Function	1	Q9BT40
9	GO:0070888	E-box binding	Molecular Function	1	Q9BQG0
9	GO:0001002	RNA polymerase III type 1 promoter sequence-specific DNA binding	Molecular Function	1	P42345
9	GO:0001003	RNA polymerase III type 2 promoter sequence-specific DNA binding	Molecular Function	1	P42345
9	GO:0001006	RNA polymerase III type 3 promoter sequence-specific DNA binding	Molecular Function	1	P42345
9	GO:0080084	5S rDNA binding	Molecular Function	1	P42345

## Sheet: CC
Level	GO_ID	Term	Type	Seqs_Num	Sequences
1	GO:0005575	cellular_component	Cellular Component	566	Q01831,Q09028,P49848,Q12789,Q8WUA4,Q9Y5Q9,Q08379,A7KAX9,O15498,O43747,P01111,P41743,P42345,P49407,P52292,P57737,Q7Z3C6,Q96PB1,Q9UBF2,Q9UI12,Q9Y2H6,Q9Y6D5,O95376,P38398,Q06587,Q15648,Q75N03,Q7Z569,Q9UL63,Q9Y4X5,Q9NXR7,P30153,P63151,P67775,Q13362,Q14738,O75817,O95707,Q01780,Q06265,O75367,Q86U86,Q9NRL2,P17987,Q6I9Y2,Q14596,Q562E7,Q4G0F4,Q9BWH6,P32780,P50613,P61289,Q16186,O60216,P49711,Q9NTI5,Q9UER7,…
2	GO:0032991	protein-containing complex	Cellular Component	334	Q01831,Q09028,P49848,Q12789,Q8WUA4,Q9Y5Q9,O95376,P38398,Q06587,Q15648,Q75N03,Q7Z569,Q9UL63,Q9Y4X5,Q9NXR7,P30153,P63151,P67775,Q13362,Q14738,O75817,O95707,Q01780,Q06265,Q9UI12,Q6I9Y2,Q4G0F4,Q9BWH6,P32780,P50613,P61289,Q16186,O75367,P07305,P16403,Q149N8,Q92522,Q86XI2,Q14691,Q9BRT9,Q9BRX5,Q9UID3,Q71F23,Q9H3R5,Q96BD8,O43660,O75934,P11142,Q8WYA6,Q99459,Q9UMS4,P38646,Q6UXV4,Q9HCC0,P17987,P49368,P50990,…
2	GO:0110165	cellular anatomical entity	Cellular Component	563	Q01831,Q09028,P49848,Q08379,A7KAX9,O15498,O43747,P01111,P41743,P42345,P49407,P52292,P57737,Q7Z3C6,Q96PB1,Q9UBF2,Q9UI12,Q9Y2H6,Q9Y6D5,P38398,Q9NXR7,Q01780,Q06265,O75367,Q86U86,Q9NRL2,P17987,Q6I9Y2,Q14596,Q562E7,P32780,P50613,O60216,P30153,P49711,P67775,Q13362,Q9NTI5,Q9UER7,O14980,Q14807,Q16181,Q8NFH4,Q8NI77,Q96BD8,Q9BW27,Q9GZM8,Q9H3R5,P05455,P29590,P49736,P49917,P78527,Q15910,Q16531,Q9H0A0,O15198,…
3	GO:0000808	origin recognition complex	Cellular Component	1	P49736
3	GO:0000930	gamma-tubulin complex	Cellular Component	1	P38398
3	GO:0000939	inner kinetochore	Cellular Component	2	Q71F23,Q9H3R5
3	GO:0000940	outer kinetochore	Cellular Component	1	Q96BD8
3	GO:0000974	Prp19 complex	Cellular Component	6	O43660,O75934,P11142,Q8WYA6,Q99459,Q9UMS4
[truncated: 775 more rows]

## Sheet: Enrichment
GO_id	Term	Category	Test	Ref	TestAll	RefAll	Test_per	Ref_per	Over_Under	TestSeqs	RefSeqs	p.value	FDR	richFactor
[truncated: 6,794 more rows]
